# Supplementary material
Source: publisher figshare collection journal article supplement (https://gsapubs.figshare.com/ndownloader/files/31208278)
Supplement: Supplementary file 1 [file 31208278]

## Sheet: Supplemental Material
This Supplemental Material accompanies Lund Snee, J.-E., and Miller, E.L., 2021, Magmatism,
migrating topography, and the transition from Sevier shortening to Basin and Range extension, western United States,
in Craddock, J.P., Malone, D.H., Foreman, B.Z., and Konstantinou, A., eds., Tectonic Evolution of the Sevier-Laramide
Hinterland, Thrust Belt, and Foreland, and Postorogenic Slab Rollback (180–20 Ma): Geological
Society of America Special Paper 555, https://doi.org/10.1130/2021.2555(13).

## Sheet: TableS1_Sample_localities
Table S1. U-Pb detrital zircon localities, lithologies, and ages from this study
			Stratigraphic height		Coordinates		Analyses
Sample	Section	Stratigraphic	above section base	Rock	Latitude	Longitude	Preferred age	Absolute error	Mean square	Age	Age
name	name	unit	(m)	type	(º in NAD27*)	(º in NAD27*)	(Ma)	(± 2σ Ma)	weighted deviation	type	method
15JLS002	Composite western base Humboldt Formation (southern part)	Humboldt Formation	5	Sandstone	40.4898	-115.885	25.08	0.19	0.42	Maximum depositional	Weighted mean (32 grains)
15JLS004	Composite western base Humboldt Formation (southern part)	Humboldt Formation	88.9	Pebble conglomerate	40.493	-115.883	21.73	0.12	0.99	Maximum depositional	Weighted mean (75 grains)
15JLS015	Sedimentary rocks below the tuff of Hackwood Ranch	Eocene–Oligocene sedimentary rocks	81.2	Medium–coarse sandstone	40.483	-115.918	29.91	0.2	1.02	Maximum depositional	Weighted mean (45 grains)
15JLS017	Composite western base Humboldt Formation (southern part)	Humboldt Formation	171.8	Ashy sandstone	40.4958	-115.879	16.59	0.31	0.86	Maximum depositional	Weighted mean (8 grains)
15JLS027A	Composite western base Humboldt Formation (northern part)	Humboldt Formation	72.3	Pebble conglomerate	40.5083	-115.882	N/A				No MDA (1 young grain)
15JLS029	Composite western base Humboldt Formation (northern part)	Humboldt Formation	101.4	Pebble conglomerate	40.51	-115.878	18.4	2.5	2.4	Maximum depositional	Weighted mean (3 grains)
15JLS036B	Eastern base Humboldt Formation	Humboldt Formation	292.5	Marl	40.5134	-115.78	N/A				No MDA (1 young grain)
15JLS037	Middle–upper Humboldt Formation (west of Lee township)	Humboldt Formation	324.7	Silty sandstone	40.6093	-115.683	12.44	0.95	0.86	Maximum depositional	Weighted mean (3 grains)
15JLS041	Middle–upper Humboldt Formation (west of Lee township)	Humboldt Formation	0	Tuff	40.6103	-115.694	14.87	0.16	0.56	Maximum depositional	Weighted mean (86 grains)
*NAD27—North American Datum 1927

## Sheet: TableS2_Detrital_zircon_ages
Table S2. Isotopic data used to calculate detrital zircon U-Pb ages
			Isotopic ratios								Apparent ages
Analysis name	206Pb	204Pb	207Pb	± 2σ	207Pb	± 2σ	206Pb	± 2σ	Error correlation	207Pb correction	206Pb*	± 2σ*	207Pb	± 2σ	207Pb	± 2σ	Best age	± 2σ	Instrument	Comments
	(cps)	(cps)	206Pb	(abs)	235U	(abs)	238U	(abs)		(Ma)	238U	(Ma)	235U	(Ma)	206Pb	(Ma)		(Ma)
Mount Dromedary tertiary standard ("Drom"):
Drom_1	26920	22	0.0497	0.0025	0.1015	0.0067	0.01511	0.00061	0.22911	-0.14	96.5	3.9	98.3	6.1	188	100	96.5	3.9	UC Santa Cruz
Drom_2	77100	70	0.0485	0.0021	0.0966	0.0058	0.01487	0.00056	0.48214	-0.02	95.1	3.6	93.5	5.3	121	87	95.1	3.6	UC Santa Cruz
Drom_3	22940	7	0.0525	0.003	0.1074	0.0075	0.01496	0.00061	0.1535	-0.52	95.2	3.9	103.3	6.8	286	120	95.2	3.9	UC Santa Cruz
Drom_4	23780	44	0.0487	0.0026	0.1021	0.0073	0.01549	0.00065	0.47954	-0.1	99	4.1	98.4	6.7	135	100	99	4.1	UC Santa Cruz
Drom_5	73800	41	0.0476	0.0021	0.101	0.0062	0.01576	0.0006	0.14393	0.06	100.9	3.8	97.5	5.7	80	85	100.9	3.8	UC Santa Cruz
Drom_6	35170	48	0.0485	0.0023	0.1012	0.0063	0.01524	0.00061	0.24343	-0.06	97.4	3.9	98	5.9	131	95	97.4	3.9	UC Santa Cruz
Drom_7	36400	36	0.0469	0.0023	0.0968	0.0063	0.01509	0.00061	0.43229	0.18	96.7	3.9	93.6	5.8	56	93	96.7	3.9	UC Santa Cruz
Drom_8	16780	40	0.0489	0.0035	0.1004	0.0081	0.01475	0.00059	0.053448	-0.13	94.3	3.8	96.6	7.4	110	130	94.3	3.8	UC Santa Cruz
Drom_9	71900	58	0.0486	0.002	0.1011	0.0058	0.01509	0.00059	0.36479	-0.03	96.5	3.8	97.7	5.4	132	85	96.5	3.8	UC Santa Cruz
Drom_10	37700	39	0.0524	0.0034	0.1149	0.0088	0.01573	0.00064	-0.030911	-0.54	100.1	4.1	110	7.7	247	110	100.1	4.1	UC Santa Cruz
Drom_11	45500	48	0.0488	0.0021	0.1044	0.0063	0.01527	0.0006	0.35861	-0.11	97.6	3.8	100.7	5.8	137	88	97.6	3.8	UC Santa Cruz
Drom_12	18290	19	0.0478	0.003	0.1009	0.0076	0.01512	0.00065	-0.057936	0.06	96.8	4.2	97.8	6.9	140	120	96.8	4.2	UC Santa Cruz
Drom_13	28700	21	0.0471	0.0024	0.0984	0.0066	0.01491	0.0006	0.33109	-0.1	95.5	3.8	95.1	6.1	73	98	95.5	3.8	UC Santa Cruz
Drom_14	63700	25	0.0467	0.002	0.1021	0.0062	0.01595	0.00064	0.50514	0.18	102.2	4.1	98.6	5.7	51	84	102.2	4.1	UC Santa Cruz
Drom_15	23750	23	0.0465	0.0028	0.0968	0.0069	0.015	0.0006	0.15433	0.15	96.2	3.8	93.5	6.4	59	110	96.2	3.8	UC Santa Cruz
Drom_16	30660	-13	0.047	0.0026	0.0996	0.0067	0.01528	0.0006	0.24572	0.17	97.9	3.8	96.2	6.1	112	110	97.9	3.8	UC Santa Cruz
Drom_17	88300	93	0.047	0.0018	0.0963	0.0055	0.01514	0.00057	0.43994	0.18	97	3.6	93.3	5.1	56	79	97	3.6	UC Santa Cruz
Drom_18	31090	-9	0.0497	0.0025	0.1036	0.0066	0.01513	0.0006	-0.079262	-0.21	96.6	3.8	99.9	6.1	165	99	96.6	3.8	UC Santa Cruz
Drom_19	10150	38	0.0437	0.0035	0.0946	0.0085	0.0153	0.00069	0.2165	0.61	98.4	4.4	91.2	7.9	-50	140	98.4	4.4	UC Santa Cruz
Drom_20	44000	32	0.047	0.0023	0.0974	0.0063	0.01474	0.00058	0.24704	0.13	94.4	3.7	94.2	5.8	48	88	94.4	3.7	UC Santa Cruz
Drom_21	29800	36	0.0463	0.0025	0.0998	0.0067	0.01548	0.00066	-0.041197	0.24	99.2	4.2	96.4	6.2	34	100	99.2	4.2	UC Santa Cruz
Drom_22	41300	-2	0.0483	0.0022	0.0989	0.006	0.01507	0.00058	0.31373	-0.02	96.4	3.7	95.7	5.5	126	92	96.4	3.7	UC Santa Cruz
Drom_23	17430	10	0.0495	0.0032	0.1034	0.0082	0.01523	0.00065	-0.02643	-0.25	97.3	4.1	99.4	7.5	150	120	97.3	4.1	UC Santa Cruz
Drom_24	51880	19	0.0501	0.0021	0.1018	0.006	0.01503	0.00058	0.36589	-0.29	95.9	3.7	98.3	5.6	193	87	95.9	3.7	UC Santa Cruz
Drom_25	45250	1	0.048	0.002	0.0968	0.006	0.01479	0.0006	0.50943	-0.17	94.6	3.8	93.7	5.5	106	83	94.6	3.8	UC Santa Cruz
Drom_26	19920	16	0.0464	0.0025	0.0963	0.0067	0.01532	0.00062	0.28579	0.2	98.2	4	93.1	6.2	42	100	98.2	4	UC Santa Cruz
Drom_27	30820	-6	0.0495	0.0027	0.1025	0.0068	0.01482	0.00059	0.17858	-0.35	94.6	3.8	98.8	6.3	169	110	94.6	3.8	UC Santa Cruz
Drom_28	21720	49	0.0524	0.0029	0.1074	0.0072	0.0146	0.00059	0.10165	-0.49	92.9	3.8	104.2	6.4	272	110	92.9	3.8	UC Santa Cruz
Drom_29	25390	-14	0.0498	0.0027	0.1024	0.0069	0.0151	0.00059	0.19506	-0.21	96.4	3.8	98.8	6.3	176	110	96.4	3.8	UC Santa Cruz
Drom_30	63400	19	0.0486	0.002	0.1018	0.006	0.01514	0.00059	0.45227	-0.11	96.8	3.8	98.3	5.5	130	86	96.8	3.8	UC Santa Cruz
Drom_31	27790	0	0.0489	0.0026	0.099	0.0068	0.01519	0.00064	-0.16031	-0.13	97.1	4.1	96.8	6.2	142	100	97.1	4.1	UC Santa Cruz
Drom_32	68010	47	0.0488	0.002	0.0974	0.0056	0.01447	0.00055	0.36783	-0.1	92.5	3.5	94.3	5.2	140	85	92.5	3.5	UC Santa Cruz
Drom_33	58500	-10	0.0477	0.0022	0.0989	0.0059	0.01481	0.00057	0.3058	0	94.8	3.6	95.7	5.5	93	90	94.8	3.6	UC Santa Cruz
Drom_34	86000	59	0.0485	0.0019	0.0991	0.0057	0.01489	0.00058	0.43087	-0.09	95.2	3.7	95.8	5.3	124	82	95.2	3.7	UC Santa Cruz
Drom_35	47200	20	0.0473	0.0022	0.0983	0.0061	0.01514	0.00058	-0.018048	0.15	96.9	3.7	95.1	5.7	77	89	96.9	3.7	UC Santa Cruz
Drom_36	42600	-7	0.047	0.0021	0.0996	0.0061	0.01521	0.0006	0.26111	0.13	97.4	3.8	96.3	5.6	65	87	97.4	3.8	UC Santa Cruz
Drom_37	44030	26	0.0486	0.0021	0.1007	0.0061	0.01518	0.0006	0.44211	-0.06	97	3.8	97.6	5.5	140	90	97	3.8	UC Santa Cruz
Drom_38	28280	28	0.0457	0.0023	0.0942	0.0062	0.01503	0.00061	0.38148	0.24	96.4	3.9	92	5.6	11	95	96.4	3.9	UC Santa Cruz
Drom_39	26650	-40	0.0485	0.0028	0.0977	0.0067	0.01492	0.0006	-0.087121	-0.1	95.4	3.8	94.4	6.2	116	110	95.4	3.8	UC Santa Cruz
Drom_40	17900	94	0.0579	0.004	0.1226	0.01	0.01539	0.00063	0.11163	-1.17	97.2	4	116.6	9.1	470	140	97.2	4	UC Santa Cruz
Drom_41	55100	52	0.0472	0.0021	0.0943	0.0057	0.01473	0.00056	0.39306	0.15	94.3	3.6	91.3	5.3	78	88	94.3	3.6	UC Santa Cruz
Drom_42	56200	66	0.0472	0.0021	0.0965	0.0059	0.01447	0.0006	0.44057	0.09	92.7	3.8	93.4	5.5	71	88	92.7	3.8	UC Santa Cruz
Drom_43	38100	8	0.0489	0.0024	0.0998	0.0066	0.01447	0.00063	-0.042949	-0.11	92.5	4	96.4	6.1	132	97	92.5	4	UC Santa Cruz
Drom_44	33590	28	0.0481	0.0024	0.1002	0.0064	0.01513	0.0006	0.33669	-0.01	96.8	3.8	96.8	5.9	127	99	96.8	3.8	UC Santa Cruz
Drom_45	8600	29	0.0484	0.004	0.0975	0.0086	0.01466	0.00065	0.12054	-0.04	93.8	4.2	93.9	8	100	150	93.8	4.2	UC Santa Cruz
Drom_46	23000	-12	0.0472	0.0028	0.0978	0.007	0.01508	0.00061	0.33086	0.08	96.6	3.9	94.5	6.4	73	110	96.6	3.9	UC Santa Cruz
Drom_47	18070	9	0.0488	0.0029	0.1008	0.0074	0.01484	0.0006	0.23429	-0.14	94.9	3.8	97.2	6.8	150	120	94.9	3.8	UC Santa Cruz
Drom_48	18420	26	0.0511	0.0031	0.1049	0.0078	0.01517	0.00063	0.15543	-0.42	96.7	4	100.9	7.1	250	120	96.7	4	UC Santa Cruz
Drom_49	35450	24	0.048	0.0024	0.0957	0.006	0.01446	0.00057	0.2719	0.03	92.5	3.6	92.6	5.6	103	97	92.5	3.6	UC Santa Cruz
Drom_50	70900	-20	0.0482	0.002	0.0942	0.0056	0.0141	0.00054	0.53447	-0.08	90.2	3.4	91.6	5.1	114	85	90.2	3.4	UC Santa Cruz
Humboldt Formation composite western section sample 15JLS002:
15JLS002_1	10360	49	0.0417	0.0037	0.023	0.0022	0.004084	0.00017	0.036013	0.16	26.4	1.1	23.1	2.2	-140	140	26.4	1.1	UC Santa Cruz
15JLS002_2	7960	-9	0.0473	0.0038	0.0268	0.0023	0.00415	0.00018	0.023621	-0.03	26.7	1.2	26.8	2.3	70	140	26.7	1.2	UC Santa Cruz
15JLS002_3	4650	18	0.0451	0.0056	0.0251	0.0032	0.00408	0.0002	0.080038	0.04	26.3	1.3	25	3.1	-50	200	26.3	1.3	UC Santa Cruz
15JLS002_4	4950	-13	0.0531	0.0057	0.0292	0.0031	0.00406	0.00021	0.03649	-0.24	25.9	1.4	29.1	3	300	190	25.9	1.4	UC Santa Cruz
15JLS002_5	28600	14	0.0466	0.0025	0.0269	0.0018	0.004236	0.00016	0.14838	0	27.2	1	26.9	1.8	51	100	27.2	1	UC Santa Cruz
15JLS002_6	9510	37	0.0463	0.0039	0.026	0.0023	0.00419	0.00023	-0.0124	0.06	27	1.5	26	2.2	80	150	27	1.5	UC Santa Cruz
15JLS002_7	7510	-13	0.0467	0.0045	0.0261	0.0027	0.00418	0.00018	0.048212	0.03	26.9	1.2	26.1	2.6	30	160	26.9	1.2	UC Santa Cruz
15JLS002_8	2090	38	0.056	0.011	0.0293	0.0056	0.00397	0.00024	-0.057307	-0.26	25.2	1.6	28.9	5.5	180	320	25.2	1.6	UC Santa Cruz
15JLS002_9	15490	43	0.0504	0.003	0.0267	0.0019	0.003951	0.00016	0.24895	-0.12	25.3	1	26.7	1.9	208	120	25.3	1	UC Santa Cruz
15JLS002_10	4620	46	0.154	0.012	0.1013	0.0079	0.00482	0.00024	-0.0086011	-4.2	26.8	1.4	98.2	7.4	2410	140	26.8	1.4	UC Santa Cruz	high 207 corr
15JLS002_11	20160	31	0.0478	0.0029	0.0265	0.0019	0.004063	0.00016	0.031562	-0.04	26.1	1	26.5	1.8	115	110	26.1	1	UC Santa Cruz
15JLS002_12	31140	86	0.0621	0.0034	0.0357	0.0025	0.004181	0.00016	0.32492	-0.53	26.4	1	35.6	2.4	650	120	26.4	1	UC Santa Cruz
15JLS002_13	10850	-27	0.0469	0.0036	0.0245	0.0021	0.003846	0.00016	0.010088	-0.01	24.7	1	24.6	2.1	40	140	24.7	1	UC Santa Cruz
15JLS002_14	20500	28	0.0451	0.0025	0.0252	0.0017	0.004193	0.00017	0.27365	0.05	27	1.1	25.3	1.7	-16	99	27	1.1	UC Santa Cruz
15JLS002_15	12690	-15	0.049	0.0039	0.0262	0.0022	0.003963	0.00016	-0.0091385	-0.08	25.4	1	26.2	2.2	100	140	25.4	1	UC Santa Cruz
15JLS002_16	23390	3	0.0459	0.0025	0.0252	0.0017	0.003987	0.00015	0.14892	0.02	25.7	1	25.3	1.7	24	100	25.7	1	UC Santa Cruz
15JLS002_17	14650	-2	0.0448	0.0033	0.0241	0.002	0.003966	0.00017	-0.046802	0.06	25.6	1.1	24.1	2	-30	130	25.6	1.1	UC Santa Cruz
15JLS002_18	28340	16	0.0482	0.0025	0.0263	0.0017	0.003966	0.00015	0.065141	-0.1	25.5	1	26.4	1.7	117	100	25.5	1	UC Santa Cruz
15JLS002_19	129100	-9	0.0476	0.0018	0.02755	0.0015	0.004236	0.00016	0.31617	-0.04	27.2	1	27.59	1.5	80	75	27.2	1	UC Santa Cruz
15JLS002_20	124400	90	0.0493	0.0019	0.02758	0.0015	0.004088	0.00015	0.42129	-0.09	26.2	1	27.68	1.5	162	81	26.2	1	UC Santa Cruz
15JLS002_21	70000	-48	0.0481	0.002	0.02642	0.0015	0.003983	0.00015	0.37162	-0.05	25.6	1	26.47	1.5	106	85	25.6	1	UC Santa Cruz
15JLS002_22	1570	18	0.053	0.013	0.0252	0.0064	0.00377	0.00026	-0.041008	-0.24	24.1	1.7	24.7	6.2	-30	340	24.1	1.7	UC Santa Cruz
15JLS002_23	9890	-4	0.0499	0.0042	0.0281	0.0025	0.0041	0.00017	0.090849	-0.11	26.3	1.1	28.1	2.5	230	150	26.3	1.1	UC Santa Cruz
15JLS002_24	22650	62	0.0492	0.0028	0.0272	0.0018	0.004033	0.00016	0.09137	-0.09	25.9	1	27.2	1.8	157	110	25.9	1	UC Santa Cruz
15JLS002_25	7530	17	0.0464	0.0041	0.0266	0.0025	0.00428	0.00019	0.015576	-0.01	27.5	1.2	26.6	2.5	70	160	27.5	1.2	UC Santa Cruz
15JLS002_26	8880	4	0.0507	0.0037	0.0284	0.0024	0.00405	0.00018	0.21695	-0.11	25.9	1.2	28.4	2.4	200	140	25.9	1.2	UC Santa Cruz
15JLS002_27	18050	81	0.0944	0.0057	0.0573	0.0043	0.004407	0.00018	0.34538	-1.71	26.6	1.1	57	4.2	1480	120	26.6	1.1	UC Santa Cruz
15JLS002_28	9790	-39	0.0513	0.0044	0.0284	0.0027	0.00409	0.00018	0.034339	-0.13	26.2	1.2	28.4	2.7	180	160	26.2	1.2	UC Santa Cruz
15JLS002_29	20770	19	0.0498	0.003	0.0269	0.002	0.003927	0.00017	0.27718	-0.1	25.2	1.1	26.9	2	193	110	25.2	1.1	UC Santa Cruz
15JLS002_30	7240	66	0.0603	0.005	0.0355	0.0032	0.00433	0.0002	0.12945	-0.5	27.4	1.3	35.4	3.2	530	160	27.4	1.3	UC Santa Cruz
15JLS002_31	32060	-7	0.0464	0.0023	0.02515	0.0016	0.003936	0.00015	0.20199	0	25.3	1	25.21	1.6	37	94	25.3	1	UC Santa Cruz
15JLS002_32	5930	58	0.055	0.015	0.031	0.0069	0.00419	0.00037	0.11223	-0.23	26.7	2.4	30.9	6.8	350	480	26.7	2.4	UC Santa Cruz	zoned:TRIM
15JLS002_33	12980	33	0.094	0.079	0.059	0.055	0.0042	0.00018	0.10636	-1.59	25.4	2.9	31.1	2.1	400	260	25.4	2.9	UC Santa Cruz
15JLS002_34	14050	70	0.0507	0.0032	0.0299	0.0024	0.00446	0.0002	0.31084	-0.15	28.5	1.3	30.1	2.3	220	120	28.5	1.3	UC Santa Cruz	zoned:TRIM
15JLS002_35	9	43																	UC Santa Cruz
15JLS002_36	24730	4	0.0481	0.0027	0.0255	0.0017	0.003879	0.00015	0.10476	-0.04	24.9	1	25.6	1.7	111	110	24.9	1	UC Santa Cruz
15JLS002_37	9840	5	0.0529	0.004	0.0293	0.0024	0.004103	0.00017	0.00034476	-0.21	26.2	1.1	29.5	2.4	280	150	26.2	1.1	UC Santa Cruz
15JLS002_38	7490	-34	0.0451	0.0043	0.0247	0.0025	0.00395	0.00019	0.11562	0.02	25.5	1.2	24.7	2.5	-10	160	25.5	1.2	UC Santa Cruz
15JLS002_39	4800	80	0.0568	0.0062	0.0315	0.0035	0.0043	0.0002	-0.0074125	-0.35	27.3	1.3	31.7	3.4	360	190	27.3	1.3	UC Santa Cruz
15JLS002_40	26560	68	0.0468	0.0027	0.0255	0.0017	0.0039	0.00015	0.085795	-0.01	25.1	1	25.6	1.7	70	110	25.1	1	UC Santa Cruz
15JLS002_41	9850	70	0.0471	0.0039	0.0265	0.0024	0.0041	0.00017	0.011877	-0.04	26.4	1.1	26.5	2.4	80	150	26.4	1.1	UC Santa Cruz
15JLS002_42	9580	14	0.057	0.0094	0.0341	0.0064	0.00431	0.00021	0.35351	-0.38	27.4	1.4	33.7	6.2	360	280	27.4	1.4	UC Santa Cruz	zoned:TRIM
15JLS002_43	4900	8	0.0525	0.0067	0.029	0.0038	0.00412	0.0002	0.074019	-0.18	26.3	1.3	28.9	3.7	110	210	26.3	1.3	UC Santa Cruz
15JLS002_44	16030	-20	0.045	0.0031	0.0251	0.002	0.004076	0.00017	-0.04787	0.05	26.3	1.1	25.1	2	-30	120	26.3	1.1	UC Santa Cruz
15JLS002_45	887	4	0.079	0.028	0.037	0.012	0.00388	0.00029	0.0095026	-0.96	23.9	2	35	11	-100	510	23.9	2	UC Santa Cruz
15JLS002_46	11120	11	0.0487	0.0041	0.0264	0.0024	0.00395	0.00017	0.042227	-0.07	25.3	1.1	26.4	2.3	80	140	25.3	1.1	UC Santa Cruz	fair
15JLS002_47	11850	-26	0.0474	0.0037	0.0268	0.0024	0.004048	0.00017	0.11608	-0.03	26	1.1	26.8	2.4	120	140	26	1.1	UC Santa Cruz
15JLS002_48	116600	52	0.0501	0.002	0.02962	0.0017	0.004293	0.00016	0.43294	-0.13	27.5	1	29.62	1.7	197	86	27.5	1	UC Santa Cruz
15JLS002_49	23310	-8	0.0496	0.0029	0.0268	0.0019	0.003902	0.00016	0.30138	-0.1	25	1	26.8	1.9	161	110	25	1	UC Santa Cruz
15JLS002_50	5540	25	0.0483	0.0056	0.026	0.003	0.00408	0.00019	-0.047266	-0.08	26.2	1.2	26.3	3	120	200	26.2	1.2	UC Santa Cruz
15JLS002_51	6340	-52	0.0506	0.0051	0.0268	0.0028	0.00395	0.00018	0.0012298	-0.11	25.3	1.2	26.8	2.8	160	180	25.3	1.2	UC Santa Cruz
15JLS002_52	13670	21	0.0448	0.0036	0.0254	0.0023	0.004157	0.00017	0.094654	0.06	26.8	1.1	25.4	2.3	-40	140	26.8	1.1	UC Santa Cruz	fair
15JLS002_53	5780	-16	0.0657	0.0071	0.0367	0.0044	0.00414	0.00018	0.26295	-0.65	26	1.2	36.4	4.3	550	200	26	1.2	UC Santa Cruz
15JLS002_54	10510	1	0.0452	0.0032	0.025	0.0021	0.00391	0.00017	0.27252	0.04	25.2	1.1	25	2.1	10	130	25.2	1.1	UC Santa Cruz	fair
15JLS002_55	6270	20	0.0454	0.0044	0.0259	0.0026	0.00408	0.00018	-0.016077	0.03	26.3	1.2	25.9	2.6	0	170	26.3	1.2	UC Santa Cruz
15JLS002_56	82	47																	UC Santa Cruz
15JLS002_57	10820	15	0.0466	0.0038	0.0252	0.0022	0.004	0.00017	0.10413	-0.01	25.7	1.1	25.4	2.3	50	150	25.7	1.1	UC Santa Cruz
15JLS002_58	11840	-17	0.0481	0.0034	0.0268	0.0021	0.00406	0.00017	0.042016	-0.02	26.1	1.1	26.8	2	90	130	26.1	1.1	UC Santa Cruz
15JLS002_59	13390	28	0.0649	0.0044	0.037	0.003	0.00413	0.00017	0.23048	-0.62	26	1.1	36.8	2.9	730	140	26	1.1	UC Santa Cruz
15JLS002_60	9370	-37	0.0511	0.004	0.0284	0.0025	0.00411	0.00017	0.1042	-0.15	26.3	1.1	28.3	2.5	230	140	26.3	1.1	UC Santa Cruz
15JLS002_61	14940	66	0.0462	0.0031	0.0259	0.002	0.004157	0.00017	0.12373	0.01	26.8	1.1	26	2	30	120	26.8	1.1	UC Santa Cruz
15JLS002_62	19200	-42	0.0495	0.0047	0.0276	0.0027	0.00415	0.00019	-0.091545	-0.08	26.6	1.2	27.6	2.6	140	180	26.6	1.2	UC Santa Cruz	zoned:TRIM
15JLS002_63	24670	14	0.0482	0.0025	0.0245	0.0016	0.003776	0.00015	0.16429	-0.06	24.2	1	24.6	1.6	108	100	24.2	1	UC Santa Cruz
15JLS002_64	14820	41	0.0558	0.0049	0.0359	0.0036	0.00464	0.00022	0.31526	-0.33	29.5	1.4	35.7	3.6	430	180	29.5	1.4	UC Santa Cruz	zoned:TRIM
15JLS002_65	6780	56	0.0472	0.0045	0.0254	0.0025	0.00412	0.00017	0.023448	-0.02	26.5	1.1	25.4	2.5	50	160	26.5	1.1	UC Santa Cruz
15JLS002_66	3400	23	0.0527	0.0069	0.0298	0.0042	0.00427	0.00021	0.13225	-0.23	27.3	1.4	29.5	4.2	240	240	27.3	1.4	UC Santa Cruz
15JLS002_67	4380	97	0.187	0.014	0.1243	0.0095	0.005	0.00025	0.11336	-5.64	26.5	1.4	118.4	8.5	2650	120	26.5	1.4	UC Santa Cruz	high 207 corr
15JLS002_68	19800	39	0.047	0.0028	0.0254	0.0018	0.003979	0.00016	0.19503	-0.02	25.6	1	25.4	1.8	67	110	25.6	1	UC Santa Cruz
15JLS002_69	7420	39	0.0418	0.0041	0.0253	0.0027	0.00438	0.0002	0.13114	0.17	28.3	1.3	25.5	2.6	-60	160	28.3	1.3	UC Santa Cruz
15JLS002_70	4960	0	0.0441	0.0044	0.0248	0.0026	0.00417	0.0002	0.097618	0.07	26.9	1.3	24.8	2.6	-70	160	26.9	1.3	UC Santa Cruz
15JLS002_71	25000	59	0.0621	0.0057	0.0375	0.0041	0.00425	0.00019	0.29803	-0.56	26.8	1.2	36.7	3.9	580	170	26.8	1.2	UC Santa Cruz	fair
15JLS002_72	37890	-23	0.0462	0.0023	0.02582	0.0016	0.004148	0.00016	0.20537	0.01	26.7	1	25.88	1.6	31	92	26.7	1	UC Santa Cruz
15JLS002_73	34700	32	0.0493	0.0027	0.0285	0.0019	0.004213	0.00016	0.11222	-0.09	27	1	28.5	1.9	155	110	27	1	UC Santa Cruz	zoned:TRIM
15JLS002_74	14230	-1	0.0484	0.0033	0.0267	0.002	0.004119	0.00017	0.036368	-0.06	26.4	1.1	26.8	2	110	130	26.4	1.1	UC Santa Cruz
15JLS002_75	11520	18	0.0463	0.003	0.0259	0.0019	0.004067	0.00017	0.15372	0.01	26.2	1.1	26	1.9	50	120	26.2	1.1	UC Santa Cruz
15JLS002_76	15480	-3	0.0558	0.0036	0.031	0.0023	0.00406	0.00017	0.25821	-0.31	25.8	1.1	31	2.3	410	130	25.8	1.1	UC Santa Cruz
15JLS002_77	38	56																	UC Santa Cruz
15JLS002_78	92900	-2	0.049	0.0019	0.0267	0.0015	0.004028	0.00015	0.39291	-0.09	25.8	1	26.75	1.5	146	82	25.8	1	UC Santa Cruz
15JLS002_79	136700	42	0.04708	0.0017	0.02673	0.0015	0.004212	0.00016	0.093702	-0.01	27.1	1	26.78	1.5	64	75	27.1	1	UC Santa Cruz
15JLS002_80	10780	-2	0.0433	0.0039	0.0251	0.0025	0.004261	0.00018	0.10566	0.11	27.5	1.2	25.1	2.5	-30	150	27.5	1.2	UC Santa Cruz
15JLS002_81	10430	87	0.1497	0.011	0.0989	0.0087	0.00466	0.0002	0.39588	-3.91	26.1	1.2	95.7	8.1	2340	130	26.1	1.2	UC Santa Cruz	high 207 corr
15JLS002_82	15030	17	0.0471	0.0033	0.0256	0.002	0.004072	0.00017	0.1036	-0.02	26.2	1.1	25.6	2	90	130	26.2	1.1	UC Santa Cruz	fair
15JLS002_83	14030	-63	0.048	0.0031	0.0263	0.002	0.004054	0.00017	0.22317	-0.05	26	1.1	26.3	2	130	120	26	1.1	UC Santa Cruz
15JLS002_84	44850	-18	0.0475	0.0021	0.02611	0.0016	0.004042	0.00015	0.26054	-0.04	26	1	26.16	1.6	91	89	26	1	UC Santa Cruz
15JLS002_85	26200	8	0.0467	0.0024	0.0266	0.0017	0.004177	0.00017	0.17187	0	26.9	1.1	26.8	1.7	68	100	26.9	1.1	UC Santa Cruz	zoned:TRIM
15JLS002_86	12430	-18	0.0451	0.0034	0.0248	0.0021	0.00407	0.00018	0.28532	0.04	26.2	1.2	24.8	2.1	10	130	26.2	1.2	UC Santa Cruz
15JLS002_87	9810	5	0.0619	0.0051	0.0373	0.0036	0.00437	0.00019	0.22002	-0.56	27.6	1.2	37.1	3.5	580	160	27.6	1.2	UC Santa Cruz
15JLS002_88	6300	86	0.043	0.0044	0.0245	0.0026	0.0042	0.00019	0.037067	0.1	27.1	1.2	24.6	2.6	-40	170	27.1	1.2	UC Santa Cruz
15JLS002_89	31760	39	0.0494	0.0026	0.0283	0.0018	0.004267	0.00016	0.2744	-0.1	27.4	1	28.3	1.8	158	100	27.4	1	UC Santa Cruz
15JLS002_90	6440	-18	0.0535	0.0047	0.0301	0.0029	0.0042	0.00019	0.25571	-0.21	26.8	1.2	30.3	2.9	280	170	26.8	1.2	UC Santa Cruz
15JLS002_91	13380	-6	0.0469	0.0033	0.0271	0.0021	0.004315	0.00018	0.11163	-0.01	27.7	1.2	27.1	2.1	50	130	27.7	1.2	UC Santa Cruz
15JLS002_92	52600	3	0.0475	0.0021	0.02651	0.0016	0.004116	0.00016	0.40409	-0.03	26.4	1	26.55	1.6	84	89	26.4	1	UC Santa Cruz	fair
15JLS002_93	10400	63	0.0444	0.0035	0.0248	0.0022	0.00412	0.00018	0.18561	0.09	26.6	1.2	25	2.2	-50	130	26.6	1.2	UC Santa Cruz
15JLS002_94	23600	54	0.0653	0.0042	0.0389	0.0031	0.00439	0.00018	0.38543	-0.66	27.6	1.1	38.6	3	710	140	27.6	1.1	UC Santa Cruz	fair
15JLS002_95	9000	115	0.0497	0.0045	0.0265	0.0025	0.003937	0.00017	0.074539	-0.1	25.2	1.1	26.5	2.5	180	160	25.2	1.1	UC Santa Cruz
15JLS002_96	9140	64	0.0432	0.0035	0.025	0.0022	0.00435	0.00018	0.17222	0.09	28.1	1.2	25	2.2	-90	140	28.1	1.2	UC Santa Cruz
15JLS002_97	85500	35	0.0466	0.002	0.02687	0.0016	0.004266	0.00016	0.26372	0	27.4	1	26.92	1.5	45	83	27.4	1	UC Santa Cruz
15JLS002_98	3620	50	0.0662	0.0075	0.0378	0.0045	0.00432	0.00022	0.13135	-0.7	27.1	1.4	38.2	4.3	680	210	27.1	1.4	UC Santa Cruz
15JLS002_99	2950	65	0.044	0.01	0.0234	0.0055	0.00435	0.00035	0.1662	0.07	28.1	2.3	23.3	5.4	20	370	28.1	2.3	UC Santa Cruz	zoned:TRIM
15JLS002_100	101000	35	0.04652	0.0018	0.02634	0.0015	0.004214	0.00016	0.46982	0	27.1	1	26.39	1.5	26	79	27.1	1	UC Santa Cruz
15JLS002_101	8210	14	0.0456	0.0042	0.0254	0.0025	0.00418	0.00019	0.13734	0.01	26.9	1.2	25.4	2.5	10	160	26.9	1.2	UC Santa Cruz
15JLS002_102	84100	-52	0.0476	0.002	0.02776	0.0017	0.004289	0.00017	0.4438	-0.04	27.6	1.1	27.79	1.6	88	87	27.6	1.1	UC Santa Cruz	zoned:TRIM
15JLS002_103	62230	67	0.0489	0.002	0.02858	0.0017	0.004301	0.00017	0.51522	-0.08	27.6	1.1	28.6	1.7	136	85	27.6	1.1	UC Santa Cruz
15JLS002_104	5700	1	0.0477	0.0053	0.0275	0.0033	0.00416	0.0002	0.10544	-0.03	26.7	1.3	27.5	3.2	110	190	26.7	1.3	UC Santa Cruz
15JLS002_105	8040	-24	0.0446	0.004	0.026	0.0024	0.00412	0.00018	0.057566	0.09	26.6	1.2	26	2.3	-20	140	26.6	1.2	UC Santa Cruz
15JLS002_106	6550	-13	0.0479	0.0044	0.0274	0.0027	0.00415	0.00018	0.046303	-0.01	26.7	1.2	27.6	2.7	130	170	26.7	1.2	UC Santa Cruz
15JLS002_107	5590	22	0.0531	0.0048	0.0293	0.0028	0.00404	0.00019	0.11557	-0.24	25.8	1.2	29.3	2.8	270	170	25.8	1.2	UC Santa Cruz
15JLS002_108	183000	32	0.04723	0.0017	0.02691	0.0015	0.004125	0.00015	0.53431	-0.03	26.5	1	26.96	1.5	69	75	26.5	1	UC Santa Cruz
15JLS002_109	35200	26	0.0478	0.0026	0.028	0.0018	0.004309	0.00017	0.057992	-0.04	27.7	1.1	28	1.8	100	100	27.7	1.1	UC Santa Cruz
15JLS002_110	17530	-31	0.0504	0.0034	0.0273	0.0021	0.003982	0.00016	0.26005	-0.13	25.5	1	27.3	2.1	200	120	25.5	1	UC Santa Cruz
15JLS002_111	5660	29	0.0541	0.0053	0.0319	0.0033	0.00424	0.00019	0.082722	-0.28	27	1.2	31.7	3.3	330	180	27	1.2	UC Santa Cruz
15JLS002_112	9030	13	0.0451	0.0037	0.0257	0.0022	0.00416	0.00018	0.053333	0.06	26.8	1.2	25.9	2.2	10	140	26.8	1.2	UC Santa Cruz
15JLS002_113	9310	-42	0.0468	0.0039	0.0255	0.0023	0.00404	0.00018	0.064216	-0.03	26	1.2	25.5	2.3	60	150	26	1.2	UC Santa Cruz
15JLS002_114	26580	-29	0.0506	0.0027	0.0264	0.0017	0.003813	0.00015	0.2191	-0.13	24.4	1	26.4	1.7	203	110	24.4	1	UC Santa Cruz	moved
15JLS002_115	7860	-18	0.0477	0.0043	0.0258	0.0026	0.00394	0.00018	0.13808	-0.06	25.3	1.2	26.1	2.6	120	160	25.3	1.2	UC Santa Cruz	moved
15JLS002_116	358000	137	0.05009	0.0017	0.02911	0.0016	0.00424	0.00016	0.60703	-0.12	27.2	1	29.13	1.6	194	77	27.2	1	UC Santa Cruz
15JLS002_117	141700	31	0.04695	0.0017	0.02675	0.0014	0.004165	0.00015	0.43699	-0.02	26.8	1	26.8	1.4	58	74	26.8	1	UC Santa Cruz
15JLS002_118	21000	13	0.0472	0.0028	0.0264	0.002	0.004022	0.00016	-0.047226	-0.03	25.9	1	26.4	2	62	110	25.9	1	UC Santa Cruz
15JLS002_119	8300	-27	0.1036	0.0066	0.0613	0.0046	0.0044	0.00018	0.13625	-2.05	26.3	1.1	60.6	4.3	1680	120	26.3	1.1	UC Santa Cruz
15JLS002_120	7790	11	0.0522	0.0052	0.0297	0.003	0.00416	0.00018	-0.11612	-0.16	26.6	1.2	29.6	2.9	240	170	26.6	1.2	UC Santa Cruz
15JLS002_121	10570	-51	0.0517	0.0048	0.0283	0.0029	0.00395	0.00018	-0.0023825	-0.19	25.2	1.2	28.3	2.9	180	160	25.2	1.2	UC Santa Cruz
15JLS002_122	82950	-26	0.0485	0.002	0.02592	0.0015	0.003882	0.00014	0.29599	-0.06	24.9	0.9	25.97	1.5	127	85	24.9	0.9	UC Santa Cruz
15JLS002_123	7380	25	0.0536	0.0049	0.0306	0.003	0.00422	0.00019	0.10751	-0.25	26.9	1.2	30.5	2.9	260	170	26.9	1.2	UC Santa Cruz
15JLS002_124	11080	74	0.0503	0.004	0.0285	0.0024	0.004111	0.00016	-0.0057166	-0.12	26.3	1	28.5	2.4	170	140	26.3	1	UC Santa Cruz
15JLS002_125	29950	10	0.0476	0.0022	0.02571	0.0016	0.003964	0.00016	0.44474	-0.03	25.5	1	25.76	1.6	97	91	25.5	1	UC Santa Cruz
15JLS002_126	8310	-18	0.0474	0.0044	0.026	0.0025	0.004087	0.00017	-0.17512	-0.03	26.3	1.1	26	2.4	80	170	26.3	1.1	UC Santa Cruz
15JLS002_127	13080	138	0.1989	0.012	0.1452	0.011	0.00538	0.00024	0.60363	-6.67	27.9	1.4	136.9	9.7	2772	93	27.9	1.4	UC Santa Cruz	fair; high 207Pb corr
15JLS002_128	13990	193	0.2326	0.012	0.1859	0.014	0.00572	0.00025	0.62435	-8.6	28.1	1.3	173.9	12	3051	88	28.1	1.3	UC Santa Cruz	fair; high 207Pb corr
15JLS002_129	6340	35	0.0493	0.0043	0.0283	0.0027	0.00418	0.00018	0.074742	-0.09	26.8	1.2	28.3	2.7	180	160	26.8	1.2	UC Santa Cruz
15JLS002_130	17560	2	0.0477	0.0032	0.0262	0.002	0.004017	0.00016	-0.0073546	-0.03	25.8	1	26.3	2	90	130	25.8	1	UC Santa Cruz
15JLS002_131	15570	40	0.0467	0.0034	0.0255	0.0022	0.003903	0.00015	0.3203	0	25.1	1	25.6	2.2	80	140	25.1	1	UC Santa Cruz
15JLS002_132	32460	50	0.0468	0.0027	0.026	0.0018	0.004024	0.00016	-2.2254e-07	-0.01	25.9	1	26.1	1.8	42	100	25.9	1	UC Santa Cruz
15JLS002_133	-13	-4																	UC Santa Cruz
15JLS002_134	7650	-4	0.0485	0.0049	0.0285	0.003	0.00424	0.00019	0.027904	-0.06	27.2	1.2	28.4	3	130	180	27.2	1.2	UC Santa Cruz
15JLS002_135	8800	9	0.0506	0.0041	0.0291	0.0026	0.00417	0.00018	0.16728	-0.16	26.7	1.2	29.3	2.5	180	150	26.7	1.2	UC Santa Cruz
15JLS002_136	8120	29	0.0447	0.0039	0.0257	0.0024	0.00423	0.00018	0.18989	0.07	27.3	1.2	25.7	2.4	-20	150	27.3	1.2	UC Santa Cruz
15JLS002_137	29620	33	0.0483	0.0026	0.0265	0.0018	0.003958	0.00016	0.10362	-0.05	25.4	1	26.6	1.7	114	100	25.4	1	UC Santa Cruz
15JLS002_138	0	36										0							UC Santa Cruz
15JLS002_139	7660	0	0.0488	0.0039	0.0288	0.0027	0.00432	0.0002	-0.17607	-0.05	27.7	1.3	29	2.7	180	160	27.7	1.3	UC Santa Cruz
15JLS002_140	-8	64																	UC Santa Cruz
15JLS002_142	9	82																	UC Santa Cruz
15JLS002_143	10	4																	UC Santa Cruz
15JLS002_144	11610	-20	0.0647	0.005	0.0379	0.0034	0.00421	0.00018	0.20326	-0.62	26.5	1.1	37.7	3.3	700	160	26.5	1.1	UC Santa Cruz
15JLS002_145	9870	28	0.0443	0.0039	0.0266	0.0025	0.00426	0.00018	-0.11329	0.07	27.5	1.2	26.6	2.5	-40	140	27.5	1.2	UC Santa Cruz
15JLS002_146	9800	-5	0.0482	0.0046	0.0289	0.0028	0.00429	0.00019	-0.028993	-0.07	27.5	1.2	28.8	2.8	100	160	27.5	1.2	UC Santa Cruz
15JLS002_147	75900	47	0.0469	0.0019	0.02654	0.0015	0.004084	0.00015	0.46749	-0.01	26.3	1	26.59	1.5	57	79	26.3	1	UC Santa Cruz
15JLS002_148	7860	34	0.0454	0.0041	0.0258	0.0024	0.00414	0.00018	-0.037793	0.04	26.7	1.2	26	2.4	0	150	26.7	1.2	UC Santa Cruz	fair
15JLS002_149	6820	5	0.102	0.022	0.058	0.012	0.00456	0.00053	0.21883	-2.02	27.3	3.3	57	11	1510	390	27.3	3.3	UC Santa Cruz	zoned:TRIM
15JLS002_150	11940	41	0.045	0.0033	0.0264	0.0022	0.00414	0.00018	0.24647	0.03	26.7	1.2	26.4	2.2	10	130	26.7	1.2	UC Santa Cruz
15JLS002_151	7550	18	0.0497	0.004	0.0273	0.0024	0.00402	0.00018	0.11114	-0.1	25.8	1.2	27.3	2.4	180	150	25.8	1.2	UC Santa Cruz
15JLS002_152	79400	44	0.0485	0.0019	0.02731	0.0015	0.004032	0.00015	0.5014	-0.06	25.9	1	27.35	1.5	126	80	25.9	1	UC Santa Cruz
15JLS002_153	12060	-5	0.0604	0.0044	0.0349	0.0031	0.00416	0.00018	0.35113	-0.46	26.3	1.1	34.7	3	600	140	26.3	1.1	UC Santa Cruz
15JLS002_154	56800	-16	0.0467	0.002	0.02618	0.0016	0.003988	0.00016	0.46052	-0.01	25.7	1	26.22	1.6	55	86	25.7	1	UC Santa Cruz
15JLS002_155	6430	-3	0.0469	0.0049	0.0262	0.0028	0.00403	0.00019	0.0063446	-0.03	25.9	1.2	26.2	2.8	70	170	25.9	1.2	UC Santa Cruz
15JLS002_156	6970	62	0.0487	0.0048	0.0275	0.0029	0.004078	0.00017	0.16179	-0.07	26.2	1.1	27.5	2.9	70	170	26.2	1.1	UC Santa Cruz
15JLS002_157	71600	49	0.0481	0.002	0.02657	0.0016	0.003957	0.00015	0.27233	-0.05	25.4	1	26.7	1.6	105	87	25.4	1	UC Santa Cruz
15JLS002_158	5260	8	0.0424	0.0051	0.0263	0.0032	0.00431	0.0002	0.12909	0.12	27.9	1.3	26.2	3.2	-20	190	27.9	1.3	UC Santa Cruz
15JLS002_159	14190	21	0.0448	0.0029	0.0276	0.0022	0.004375	0.00018	0.2321	0.07	28.2	1.2	27.6	2.2	0	120	28.2	1.2	UC Santa Cruz
15JLS002_160	9530	36	0.0486	0.0043	0.0266	0.0026	0.003872	0.00016	0.080459	-0.06	24.8	1	26.6	2.6	130	160	24.8	1	UC Santa Cruz
15JLS002_161	4280	-5	0.0527	0.0061	0.028	0.0031	0.00396	0.0002	0.016651	-0.18	25.3	1.3	28.3	3	260	200	25.3	1.3	UC Santa Cruz
15JLS002_162	20700	66	0.0481	0.0029	0.0279	0.002	0.004132	0.00016	0.25062	-0.05	26.5	1	27.9	2	127	110	26.5	1	UC Santa Cruz
15JLS002_163	23530	5	0.0477	0.0027	0.0268	0.0018	0.004053	0.00017	0.14097	-0.03	26	1.1	26.8	1.8	89	110	26	1.1	UC Santa Cruz
15JLS002_164	36900	43	0.051	0.0026	0.0285	0.0018	0.004017	0.00016	0.09197	-0.14	25.7	1	28.5	1.8	228	100	25.7	1	UC Santa Cruz
15JLS002_165	10110	-12	0.0483	0.0041	0.0276	0.0026	0.004191	0.00017	0.075704	-0.06	26.9	1.1	27.6	2.5	90	150	26.9	1.1	UC Santa Cruz
15JLS002_166	125300	-4	0.04591	0.0017	0.0263	0.0015	0.004115	0.00015	0.37244	0.02	26.5	1	26.35	1.4	14	74	26.5	1	UC Santa Cruz
15JLS002_167	13630	36	0.0478	0.0038	0.0272	0.0024	0.00413	0.00017	-0.0043996	-0.03	26.5	1.1	27.2	2.3	70	140	26.5	1.1	UC Santa Cruz
15JLS002_168	5040	38	0.0527	0.0052	0.0311	0.0033	0.00424	0.0002	0.16085	-0.25	27.1	1.3	31.3	3.3	350	180	27.1	1.3	UC Santa Cruz
15JLS002_169	7740	0	0.0467	0.0047	0.0269	0.0028	0.00421	0.00019	0.071006	0.02	27.1	1.2	26.9	2.8	20	170	27.1	1.2	UC Santa Cruz
15JLS002_170	12020	27	0.0493	0.0035	0.0277	0.0023	0.004095	0.00017	0.26651	-0.09	26.3	1.1	27.7	2.3	180	130	26.3	1.1	UC Santa Cruz
15JLS002_171	10740	-36	0.0437	0.0036	0.025	0.0023	0.00408	0.00018	0.030191	0.09	26.3	1.2	25	2.2	-50	140	26.3	1.2	UC Santa Cruz
15JLS002_172	3540	29	0.0601	0.0086	0.0341	0.005	0.00421	0.0002	0.2563	-0.47	26.6	1.3	33.7	4.9	470	250	26.6	1.3	UC Santa Cruz
15JLS002_173	12240	-18	0.0458	0.003	0.0259	0.002	0.00409	0.00017	0.11717	0.03	26.3	1.1	26	1.9	40	120	26.3	1.1	UC Santa Cruz
15JLS002_174	3770	-36	0.0559	0.006	0.0337	0.0039	0.00433	0.00021	0.18993	-0.33	27.5	1.3	33.5	3.8	360	200	27.5	1.3	UC Santa Cruz
15JLS002_175	12620	14	0.0478	0.0036	0.0268	0.0022	0.00407	0.00017	0.081458	-0.04	26.1	1.1	26.8	2.2	130	140	26.1	1.1	UC Santa Cruz
15JLS002_176	5580	-16	0.06	0.0077	0.0355	0.0048	0.00419	0.00021	0.16299	-0.4	26.5	1.4	35.2	4.7	480	240	26.5	1.4	UC Santa Cruz	zoned:TRIM
15JLS002_177	7160	9	0.0514	0.0048	0.0301	0.0031	0.0042	0.00018	0.066573	-0.18	26.9	1.2	30.2	3.1	230	170	26.9	1.2	UC Santa Cruz
15JLS002_178	6370	34	0.0526	0.006	0.0288	0.0035	0.00396	0.00018	-0.08044	-0.22	25.3	1.2	28.7	3.4	150	190	25.3	1.2	UC Santa Cruz
15JLS002_179	0	26																	UC Santa Cruz
15JLS002_180	18	-7																	UC Santa Cruz
15JLS002_181	52	-16																	UC Santa Cruz
15JLS002_182	78	72																	UC Santa Cruz
15JLS002_183	-1	6																	UC Santa Cruz
15JLS002_184	49	35																	UC Santa Cruz
15JLS002_185	35	19																	UC Santa Cruz
15JLS002_186	16800	52	0.0496	0.0032	0.0271	0.002	0.003944	0.00016	0.24627	-0.1	25.3	1	27.1	2	150	120	25.3	1	UC Santa Cruz
15JLS002_187	11740	15	0.049	0.0035	0.0294	0.0023	0.004381	0.00018	0.060151	-0.09	28.1	1.2	29.4	2.3	160	130	28.1	1.2	UC Santa Cruz
15JLS002_188	4010	52	0.0477	0.0058	0.0267	0.0032	0.00417	0.0002	-0.16728	-0.01	26.8	1.3	26.6	3.2	20	190	26.8	1.3	UC Santa Cruz
15JLS002_189	31	48																	UC Santa Cruz
15JLS002_190	19640	21	0.0465	0.003	0.0258	0.0019	0.003938	0.00016	0.040942	0	25.3	1	25.8	1.9	30	120	25.3	1	UC Santa Cruz
15JLS002_191	9220	28	0.068	0.0055	0.0411	0.0038	0.00434	0.00018	0.17709	-0.76	27.2	1.1	40.8	3.7	830	160	27.2	1.1	UC Santa Cruz
15JLS002_192	5900	47	0.0539	0.0065	0.0317	0.0039	0.0042	0.00022	0.12302	-0.23	26.8	1.4	31.6	3.8	320	220	26.8	1.4	UC Santa Cruz	zoned:TRIM
15JLS002_193	21300	49	0.0448	0.0027	0.0283	0.0021	0.00447	0.00018	0.20561	0.04	28.8	1.2	28.3	2.1	-18	110	28.8	1.2	UC Santa Cruz
15JLS002_194	19020	20	0.0474	0.003	0.0263	0.002	0.003948	0.00016	0.17587	-0.03	25.4	1	26.3	2	90	120	25.4	1	UC Santa Cruz
15JLS002_195	5880	24	0.043	0.0042	0.0262	0.0027	0.00416	0.00019	5.7257e-05	0.1	26.9	1.2	26.2	2.6	-60	160	26.9	1.2	UC Santa Cruz
15JLS002_196	2400	-4	0.0472	0.0084	0.0279	0.0051	0.0041	0.00022	0.26219	-0.05	26.4	1.4	27.6	5	90	280	26.4	1.4	UC Santa Cruz
15JLS002_197	9070	14	0.0553	0.0055	0.0297	0.0031	0.003967	0.00017	0.22151	-0.28	25.2	1.1	29.6	3	290	170	25.2	1.1	UC Santa Cruz
15JLS002_198	17940	6	0.0492	0.003	0.0262	0.0019	0.003842	0.00015	0.21397	-0.08	24.6	1	26.2	1.9	170	120	24.6	1	UC Santa Cruz
15JLS002_199	18880	-10	0.047	0.0027	0.0265	0.0019	0.00402	0.00016	0.27074	-0.01	25.8	1	26.6	1.9	79	110	25.8	1	UC Santa Cruz
15JLS002_200	7110	25	0.0471	0.0047	0.0275	0.0029	0.00414	0.0002	0.17387	-0.04	26.6	1.3	27.5	2.8	80	170	26.6	1.3	UC Santa Cruz
Humboldt Formation composite western section sample 15JLS004:
15JLS004_1	6450	49	0.0465	0.0062	0.0158	0.0021	0.00244	0.00014	0.18884	-0.03	15.7	0.9	16.2	2	70	220	15.7	0.9	UC Santa Cruz	zoned:DEL
15JLS004_2	5630	49	0.0437	0.0046	0.0206	0.0022	0.00337	0.00015	0.054834	0.07	21.8	1	20.9	2.2	-20	170	21.8	1	UC Santa Cruz
15JLS004_3	17270	48	0.0471	0.0031	0.0214	0.0016	0.003289	0.00013	0.13161	-0.02	21.2	0.8	21.4	1.6	90	120	21.2	0.8	UC Santa Cruz
15JLS004_4	8130	51	0.0585	0.0054	0.0275	0.0028	0.00341	0.00017	0.29964	-0.3	21.6	1.1	27.5	2.7	470	170	21.6	1.1	UC Santa Cruz
15JLS004_5	3690	68	0.0479	0.0061	0.0234	0.0033	0.00339	0.00017	0.12225	-0.04	21.8	1.1	23.3	3.2	150	220	21.8	1.1	UC Santa Cruz
15JLS004_6	2600	8	0.0422	0.0074	0.021	0.0036	0.00342	0.0002	0.16703	0.13	22.1	1.3	21	3.6	-110	240	22.1	1.3	UC Santa Cruz
15JLS004_7	5610	-43	0.0535	0.0059	0.0241	0.0028	0.00331	0.00016	-0.099109	-0.2	21.1	1	24.1	2.8	200	190	21.1	1	UC Santa Cruz
15JLS004_8	4480	44	0.0479	0.0056	0.0231	0.0028	0.00345	0.00016	-0.027259	-0.06	22.2	1	23.1	2.8	60	200	22.2	1	UC Santa Cruz
15JLS004_9	-21	22																	UC Santa Cruz
15JLS004_10	2290	91	0.057	0.011	0.0286	0.0051	0.00359	0.00021	0.011606	-0.31	22.8	1.4	28.3	5.1	270	310	22.8	1.4	UC Santa Cruz
15JLS004_11	1744	95	0.23	0.026	0.134	0.014	0.00431	0.00029	0.11671	-6.4	21.3	1.7	128	13	3000	190	21.3	1.7	UC Santa Cruz	high 207 corr
15JLS004_12	3022	40	0.0496	0.0072	0.0241	0.0035	0.00339	0.00016	0.073795	-0.08	21.7	1	24	3.5	250	230	21.7	1	UC Santa Cruz
15JLS004_13	4930	48	0.0537	0.0054	0.0256	0.0027	0.0035	0.00017	0.15506	-0.19	22.3	1.1	25.6	2.7	290	190	22.3	1.1	UC Santa Cruz
15JLS004_14	6870	44	0.0501	0.005	0.0229	0.0025	0.00338	0.00016	0.22516	-0.08	21.7	1	22.9	2.4	150	180	21.7	1	UC Santa Cruz
15JLS004_15	11550	17	0.0446	0.0034	0.0205	0.0018	0.003332	0.00014	0.12869	0.05	21.5	0.9	20.6	1.8	-30	130	21.5	0.9	UC Santa Cruz
15JLS004_16	2830	23	0.0458	0.0079	0.0217	0.0039	0.00351	0.00017	0.20106	0.04	22.6	1.1	21.6	3.8	-20	270	22.6	1.1	UC Santa Cruz
15JLS004_17	4760	33	0.0445	0.005	0.0207	0.0025	0.00353	0.00017	0.11862	0.06	22.8	1.1	20.9	2.4	-10	180	22.8	1.1	UC Santa Cruz
15JLS004_18	3950	15	0.0519	0.0074	0.0232	0.0031	0.00351	0.00019	-0.11942	-0.14	22.4	1.2	23.1	3.1	230	220	22.4	1.2	UC Santa Cruz
15JLS004_19	5690	-14	0.0476	0.0049	0.0214	0.0024	0.003327	0.00015	0.056456	-0.03	21.4	1	21.4	2.3	60	180	21.4	1	UC Santa Cruz
15JLS004_20	137600	42	0.0897	0.0032	3.126	0.17	0.2517	0.0095	0.51888	0	1449	49	1439	42	1426	67	1426	67	UC Santa Cruz
15JLS004_21	2810	46	0.0469	0.0085	0.02	0.0036	0.00324	0.00018	0.071164	0.01	20.8	1.2	19.9	3.6	10	280	20.8	1.2	UC Santa Cruz
15JLS004_22	4310	-4	0.0513	0.0092	0.0254	0.0045	0.0036	0.00023	-0.040094	-0.18	23	1.5	25.3	4.4	170	310	23	1.5	UC Santa Cruz	zoned:TRIM
15JLS004_23	3080	31	0.0487	0.0093	0.0226	0.0042	0.00338	0.00018	0.14016	-0.09	21.7	1.2	22.5	4.1	-140	270	21.7	1.2	UC Santa Cruz
15JLS004_24	4780	-24	0.0461	0.006	0.0233	0.0031	0.00363	0.00017	0.029175	-0.01	23.4	1.1	23.2	3.1	0	200	23.4	1.1	UC Santa Cruz
15JLS004_25	4190	21	0.0454	0.0058	0.0208	0.0027	0.00342	0.00017	0.076744	0.04	22	1.1	20.8	2.6	-60	200	22	1.1	UC Santa Cruz
15JLS004_26	3830	-20	0.054	0.0068	0.025	0.0031	0.00342	0.00018	0.02215	-0.18	21.8	1.2	25.6	3.1	300	220	21.8	1.2	UC Santa Cruz
15JLS004_27	4830	5	0.0482	0.0053	0.0251	0.0029	0.00371	0.00018	0.039714	-0.04	23.8	1.2	25.1	2.9	140	200	23.8	1.2	UC Santa Cruz
15JLS004_28	30480	-16	0.0475	0.0024	0.02357	0.0015	0.003617	0.00014	0.31535	-0.02	23.2	0.9	23.65	1.5	96	98	23.2	0.9	UC Santa Cruz
15JLS004_29	4070	27	0.0546	0.0065	0.0248	0.003	0.00327	0.00016	0.050488	-0.22	20.8	1	24.8	2.9	300	210	20.8	1	UC Santa Cruz
15JLS004_30	11500	59	0.0457	0.0034	0.0214	0.0018	0.003394	0.00014	0.078347	0.02	21.9	0.9	21.4	1.8	30	120	21.9	0.9	UC Santa Cruz
15JLS004_31	9460	19	0.05	0.0041	0.0218	0.0019	0.003265	0.00014	0.078416	-0.09	20.9	0.9	21.9	1.9	150	150	20.9	0.9	UC Santa Cruz
15JLS004_32	6730	3	0.0472	0.0046	0.0208	0.0021	0.003344	0.00015	0.14799	-0.02	21.5	1	20.9	2.1	60	160	21.5	1	UC Santa Cruz
15JLS004_33	2960	26	0.0482	0.0071	0.0241	0.0036	0.00354	0.00019	0.141	-0.07	22.7	1.2	24	3.6	140	240	22.7	1.2	UC Santa Cruz
15JLS004_34	15900	16	0.0495	0.0033	0.0242	0.0019	0.003561	0.00015	0.26592	-0.08	22.8	1	24.3	1.9	170	130	22.8	1	UC Santa Cruz	fair
15JLS004_35	43500	11	0.0746	0.0032	1.687	0.1	0.1634	0.0066	0.19566	0	975	36	1004	38	1051	85	975	36	UC Santa Cruz
15JLS004_36	2370	16	0.0528	0.01	0.0231	0.0044	0.00352	0.0002	-0.11447	-0.13	22.5	1.3	22.9	4.3	100	290	22.5	1.3	UC Santa Cruz
15JLS004_37	4860	8	0.0477	0.0057	0.0225	0.0027	0.00348	0.00016	-0.055007	-0.04	22.4	1	22.5	2.7	80	200	22.4	1	UC Santa Cruz
15JLS004_38	5020	19	0.05	0.0047	0.0255	0.0025	0.00352	0.00017	0.095848	-0.13	22.6	1.1	25.5	2.5	220	170	22.6	1.1	UC Santa Cruz
15JLS004_39	3800	37	0.0518	0.0066	0.0242	0.0032	0.00329	0.00017	0.091603	-0.16	21	1.1	24.2	3.2	300	220	21	1.1	UC Santa Cruz
15JLS004_40	6240	5	0.0445	0.0048	0.0208	0.0023	0.00335	0.00016	0.055517	0.07	21.6	1	20.8	2.3	0	180	21.6	1	UC Santa Cruz
15JLS004_41	9610	-27	0.0437	0.0038	0.0197	0.0018	0.00339	0.00014	0.039554	0.07	21.9	0.9	19.8	1.8	-60	150	21.9	0.9	UC Santa Cruz
15JLS004_42	6890	32	0.0467	0.0046	0.0218	0.0023	0.003407	0.00015	0.14155	-0.01	21.9	1	21.8	2.3	30	170	21.9	1	UC Santa Cruz
15JLS004_43	5630	47	0.0488	0.0049	0.0226	0.0023	0.00344	0.00017	0.082801	-0.1	22.1	1.1	22.6	2.3	130	180	22.1	1.1	UC Santa Cruz
15JLS004_44	103300	5	0.0496	0.002	0.1279	0.01	0.0185	0.0013	0.52414	-0.11	118	8.2	121.4	9.4	171	85	118	8.2	UC Santa Cruz
15JLS004_45	78400	38	0.0784	0.003	2.056	0.12	0.1873	0.0075	0.58858	0	1106	40	1131	40	1155	79	1155	79	UC Santa Cruz	fair
15JLS004_46	2640	36	0.069	0.011	0.0318	0.0048	0.00342	0.00019	-0.0054401	-0.62	21.4	1.2	31.5	4.7	440	270	21.4	1.2	UC Santa Cruz
15JLS004_47	37	30																	UC Santa Cruz
15JLS004_48	133200	26	0.1941	0.0066	14.28	0.78	0.5261	0.02	0.77332	0	2726	87	2768	52	2777	54	2777	54	UC Santa Cruz
15JLS004_49	74400	17	0.0558	0.0035	0.516	0.044	0.0667	0.0043	0.66916	-0.11	415.9	26.3	420	30	420	140	415.9	26.3	UC Santa Cruz	zoned:TRIM
15JLS004_50	8190	65	0.0465	0.0039	0.0214	0.002	0.003413	0.00015	0.15777	0	22	1	21.5	1.9	50	150	22	1	UC Santa Cruz
15JLS004_51	7660	40	0.0471	0.0046	0.0212	0.0022	0.003356	0.00015	0.071417	-0.02	21.6	1	21.5	2.2	130	170	21.6	1	UC Santa Cruz
15JLS004_52	4180	54	0.0464	0.0058	0.0213	0.003	0.00342	0.00016	0.1547	0	22	1	21.3	2.9	90	210	22	1	UC Santa Cruz
15JLS004_53	7480	11	0.0443	0.0038	0.022	0.0021	0.00353	0.00016	0.095859	0.1	22.8	1	22.1	2.1	-10	140	22.8	1	UC Santa Cruz
15JLS004_54	644000	39	0.1098	0.0036	4.546	0.24	0.2998	0.011	0.83019	0	1689	57	1736	45	1795	59	1795	59	UC Santa Cruz
15JLS004_55	369200	47	0.1266	0.0043	5.94	0.33	0.3418	0.014	0.84548	0	1897	65	1971	46	2046	60	2046	60	UC Santa Cruz	76 fair
15JLS004_56	4420	8	0.0564	0.0058	0.0276	0.0031	0.00359	0.00017	0.17288	-0.28	22.8	1.1	27.5	3	420	190	22.8	1.1	UC Santa Cruz
15JLS004_57	6930	20	0.0554	0.0053	0.0292	0.0039	0.00362	0.00018	0.50306	-0.28	23	1.2	29	3.8	290	170	23	1.2	UC Santa Cruz	fair
15JLS004_58	3100	-9	0.0527	0.0083	0.036	0.0056	0.00496	0.00035	0.19631	-0.25	31.7	2.3	35.6	5.5	240	260	31.7	2.3	UC Santa Cruz	zoned:TRIM
15JLS004_59	2380	80	0.054	0.01	0.023	0.0043	0.0034	0.0002	0.048234	-0.23	21.7	1.3	22.9	4.2	200	290	21.7	1.3	UC Santa Cruz
15JLS004_60	4290	84	0.0495	0.0055	0.0364	0.0044	0.00528	0.00025	0.15236	-0.17	33.8	1.6	36.5	4.2	140	200	33.8	1.6	UC Santa Cruz
15JLS004_61	2078	41	0.0471	0.0097	0.0228	0.0047	0.00349	0.0002	0.23771	-0.06	22.4	1.3	22.6	4.6	90	310	22.4	1.3	UC Santa Cruz
15JLS004_62	5590	22	0.0516	0.0056	0.0242	0.0028	0.00346	0.00017	-0.10181	-0.13	22.1	1.1	24.2	2.7	140	190	22.1	1.1	UC Santa Cruz
15JLS004_63	4880	47	0.0438	0.0057	0.0209	0.0028	0.0035	0.00017	0.065381	0.09	22.6	1.1	20.9	2.7	-80	200	22.6	1.1	UC Santa Cruz
15JLS004_64	2270	11	0.058	0.014	0.0442	0.01	0.00554	0.00036	-0.1019	-0.49	35.1	2.4	42.5	9.8	370	370	35.1	2.4	UC Santa Cruz
15JLS004_65	4350	40	0.0483	0.0069	0.0241	0.0033	0.00351	0.00018	-0.11379	-0.02	22.5	1.2	24.4	3.2	220	220	22.5	1.2	UC Santa Cruz
15JLS004_66	3990	12	0.0444	0.0057	0.0209	0.0026	0.00346	0.00018	-0.00089923	0.04	22.3	1.2	20.9	2.6	-20	200	22.3	1.2	UC Santa Cruz
15JLS004_67	6130	65	0.0453	0.0045	0.0202	0.0022	0.00345	0.00017	0.16113	0.06	22.2	1.1	20.3	2.1	-30	170	22.2	1.1	UC Santa Cruz
15JLS004_68	11250	21	0.0462	0.0039	0.0219	0.002	0.003535	0.00015	0.066343	0.01	22.8	1	22	1.9	60	150	22.8	1	UC Santa Cruz
15JLS004_69	3840	9	0.0437	0.0057	0.0214	0.0028	0.003386	0.00015	-0.03815	0.08	21.9	1	21.4	2.8	-40	200	21.9	1	UC Santa Cruz
15JLS004_70	12850	27	0.0481	0.0035	0.0226	0.0018	0.003382	0.00014	0.050276	-0.04	21.7	0.9	22.7	1.8	120	130	21.7	0.9	UC Santa Cruz
15JLS004_71	5210	-11	0.0442	0.0046	0.0342	0.0037	0.00552	0.00026	0.060804	0.1	35.6	1.7	34	3.6	30	170	35.6	1.7	UC Santa Cruz
15JLS004_72	7680	26	0.0481	0.0043	0.0219	0.0021	0.00347	0.00016	0.18298	-0.08	22.3	1	22	2.1	80	160	22.3	1	UC Santa Cruz
15JLS004_73	28460	41	0.0712	0.0035	1.187	0.076	0.1219	0.0048	0.30966	-5.8	735.2	28.2	801	35	945	100	735.2	28.2	UC Santa Cruz
15JLS004_74	11080	20	0.0506	0.0036	0.024	0.002	0.003376	0.00014	0.34348	-0.12	21.6	0.9	24	2	210	130	21.6	0.9	UC Santa Cruz
15JLS004_75	14360	50	0.0621	0.0034	0.824	0.058	0.0952	0.004	0.36904	-1.59	584.4	24	606	32	633	120	584.4	24	UC Santa Cruz
15JLS004_76	108700	44	0.0753	0.0046	1.57	0.13	0.1597	0.0087	0.66007	0	954	49	953	54	1103	110	954	49	UC Santa Cruz	zoned:TRIM
15JLS004_77	8470	0	0.0697	0.0069	0.0334	0.0037	0.003493	0.00015	0.35472	-0.66	21.8	1	33.2	3.6	800	200	21.8	1	UC Santa Cruz
15JLS004_78	6690	48	0.0476	0.0044	0.0219	0.0022	0.00339	0.00016	0.21731	-0.03	21.8	1	22.2	2.2	70	160	21.8	1	UC Santa Cruz
15JLS004_79	1500	46	0.04	0.013	0.0205	0.0062	0.00372	0.00022	0.0099598	0.23	24.1	1.5	20	6.1	-230	380	24.1	1.5	UC Santa Cruz
15JLS004_80	4220	-50	0.0572	0.0073	0.0262	0.0032	0.00355	0.00018	0.052087	-0.28	22.5	1.2	26.7	3.3	410	220	22.5	1.2	UC Santa Cruz
15JLS004_81	175000	15	0.1113	0.0039	4.76	0.26	0.3068	0.012	0.75163	0	1723	61	1775	47	1815	63	1815	63	UC Santa Cruz	76 good
15JLS004_82	11700	43	0.0495	0.0039	0.0239	0.002	0.003581	0.00016	0.12915	-0.08	23	1	24	2	170	140	23	1	UC Santa Cruz
15JLS004_83	200000	-22	0.101	0.0035	4.202	0.23	0.3075	0.012	0.72325	0	1730	59	1672	44	1639	65	1639	65	UC Santa Cruz	76 good
15JLS004_84	17400	-40	0.0468	0.0031	0.0207	0.0016	0.003203	0.00013	0.34945	-0.01	20.6	0.8	20.8	1.6	80	130	20.6	0.8	UC Santa Cruz
15JLS004_85	1398	9	0.061	0.015	0.0262	0.0062	0.00356	0.00027	0.02212	-0.41	22.5	1.8	27	6.3	120	380	22.5	1.8	UC Santa Cruz
15JLS004_86	3200	-27	0.07	0.011	0.0316	0.0047	0.00336	0.00019	0.024313	-0.64	21	1.2	31.4	4.5	500	260	21	1.2	UC Santa Cruz
15JLS004_87	125300	48	0.0853	0.003	2.581	0.15	0.2185	0.0086	0.74359	0	1273	46	1294	40	1315	70	1315	70	UC Santa Cruz
15JLS004_88	5520	13	0.0505	0.0053	0.0222	0.0023	0.00331	0.00016	-0.010358	-0.13	21.2	1	22.2	2.3	190	190	21.2	1	UC Santa Cruz
15JLS004_89	6200	21	0.0527	0.0053	0.0255	0.0025	0.00361	0.00019	0.13094	-0.15	23	1.2	25.5	2.5	270	180	23	1.2	UC Santa Cruz
15JLS004_91	132500	36	0.0963	0.0034	2.862	0.16	0.2141	0.0087	0.7764	0	1249	46	1373	42	1554	66	1554	66	UC Santa Cruz
15JLS004_92	10320	37	0.0445	0.0036	0.0216	0.0019	0.00339	0.00015	0.19195	0.06	21.9	1	21.7	1.9	-10	140	21.9	1	UC Santa Cruz
15JLS004_93	7910	12	0.0513	0.0046	0.0241	0.0023	0.00342	0.00016	0.059899	-0.16	21.9	1	24.1	2.3	230	170	21.9	1	UC Santa Cruz
15JLS004_94	4130	31	0.0493	0.0062	0.0235	0.0029	0.00353	0.0002	0.018479	-0.1	22.6	1.3	23.5	2.9	140	210	22.6	1.3	UC Santa Cruz
15JLS004_95	7450	-1	0.0429	0.0048	0.0205	0.0022	0.00341	0.00017	0.044413	0.12	22	1.1	20.6	2.2	-80	170	22	1.1	UC Santa Cruz
15JLS004_96	4970	47	0.0509	0.0048	0.0231	0.0024	0.00332	0.00016	0.12818	-0.13	21.2	1	23.1	2.4	230	170	21.2	1	UC Santa Cruz
15JLS004_97	2710	-28	0.0387	0.0079	0.0211	0.0041	0.00381	0.00021	0.030115	0.26	24.8	1.4	20.9	4.1	-230	280	24.8	1.4	UC Santa Cruz
15JLS004_98	4340	19	0.0426	0.0053	0.0205	0.0028	0.00346	0.00017	0.19425	0.12	22.4	1.1	20.5	2.8	-40	200	22.4	1.1	UC Santa Cruz
15JLS004_99	6910	26	0.0521	0.0049	0.0234	0.0023	0.003312	0.00014	-0.055805	-0.16	21.2	0.9	23.5	2.3	260	180	21.2	0.9	UC Santa Cruz
15JLS004_100	5960	63	0.0646	0.0067	0.0312	0.0034	0.00351	0.00017	0.015222	-0.52	22.1	1.1	31.1	3.4	550	200	22.1	1.1	UC Santa Cruz
15JLS004_101	6930	6	0.046	0.0042	0.0211	0.0021	0.003369	0.00015	0.017242	0.01	21.7	1	21.1	2.1	10	160	21.7	1	UC Santa Cruz
15JLS004_102	4670	38	0.39	0.67	0.27	0.48	0.00369	0.00019	-0.11292	-10.32	13.4	20.1	28.1	3.1	1100	1600	13.4	20.1	UC Santa Cruz	high 207 corr
15JLS004_103	5180	20	0.0543	0.0053	0.0244	0.0027	0.003303	0.00015	0.25503	-0.21	21	1	24.4	2.6	290	180	21	1	UC Santa Cruz
15JLS004_104	1527	-25	0.05	0.013	0.0227	0.0056	0.00326	0.00024	0.11685	-0.11	20.9	1.6	22.4	5.6	30	370	20.9	1.6	UC Santa Cruz	fair
15JLS004_105	5890	-14	0.0431	0.0046	0.0204	0.0023	0.00349	0.00017	-0.0674	0.11	22.6	1.1	20.4	2.3	-100	170	22.6	1.1	UC Santa Cruz
15JLS004_106	5900	46	0.0458	0.0049	0.0214	0.0024	0.00333	0.00015	-0.07198	-0.01	21.4	1	21.4	2.3	40	180	21.4	1	UC Santa Cruz
15JLS004_107	4650	0	0.0454	0.0055	0.0209	0.0026	0.00333	0.00015	-0.038164	0	21.5	1	21	2.6	-10	200	21.5	1	UC Santa Cruz
15JLS004_108	7510	32	0.0436	0.004	0.0189	0.0018	0.003313	0.00014	0.05949	0.08	21.4	0.9	19	1.8	-90	150	21.4	0.9	UC Santa Cruz
15JLS004_109	1249	7	0.071	0.018	0.0283	0.0063	0.00323	0.00024	0.0052748	-0.66	20.1	1.6	27.8	6.2	350	390	20.1	1.6	UC Santa Cruz	fair
15JLS004_110	5480	40	0.094	0.011	0.0458	0.006	0.00351	0.00017	0.36074	-1.38	21.2	1.1	45.1	5.8	1220	240	21.2	1.1	UC Santa Cruz	fair
15JLS004_111	3440	46	0.0473	0.0067	0.0221	0.0032	0.0034	0.00018	0.049186	0.01	21.9	1.2	22.1	3.2	20	220	21.9	1.2	UC Santa Cruz
15JLS004_112	3010	13	0.062	0.014	0.0282	0.0052	0.00375	0.00022	-0.035584	-0.54	23.7	1.5	27.9	5.1	90	290	23.7	1.5	UC Santa Cruz
15JLS004_113	2900	18	0.0536	0.0081	0.0236	0.0035	0.00324	0.00018	-0.033876	-0.17	20.7	1.2	23.8	3.5	290	250	20.7	1.2	UC Santa Cruz
15JLS004_114	3510	-17	0.0528	0.0071	0.0401	0.0056	0.00544	0.00027	0.16063	-0.29	34.7	1.7	39.5	5.5	300	220	34.7	1.7	UC Santa Cruz	fair
15JLS004_115	7080	32	0.0409	0.0042	0.0203	0.0021	0.00353	0.00016	0.019553	0.14	22.9	1	20.4	2.1	-160	160	22.9	1	UC Santa Cruz
15JLS004_116	8560	57	0.0466	0.0041	0.0216	0.0021	0.0034	0.00016	0.14754	0.03	21.9	1	21.7	2	90	160	21.9	1	UC Santa Cruz
15JLS004_117	3240	-25	0.0471	0.0072	0.023	0.0035	0.00344	0.00019	0.098619	0	22.1	1.2	22.9	3.5	110	250	22.1	1.2	UC Santa Cruz
15JLS004_118	4180	7	0.0412	0.0059	0.0203	0.0029	0.00355	0.00017	0.12618	0.18	23	1.1	20.3	2.9	-90	220	23	1.1	UC Santa Cruz
15JLS004_119	4820	35	0.055	0.0062	0.0267	0.0031	0.00352	0.00017	0.14506	-0.25	22.4	1.1	26.6	3.1	370	200	22.4	1.1	UC Santa Cruz
15JLS004_120	5890	-1	0.0625	0.0079	0.0306	0.0042	0.00344	0.00017	0.024559	-0.48	21.7	1.1	30.4	4.1	520	240	21.7	1.1	UC Santa Cruz
Eocene–Oligocene sedimentary rocks below the tuff of Hackwood Ranch sample 15JLS015:
15JLS015_1	1314	38	0.114	0.049	0.074	0.047	0.00574	0.0004	0.015962	-3.13	33.8	3.3	49	11	300	450	33.8	3.3	UC Santa Cruz
15JLS015_2	1880	19	0.048	0.011	0.0389	0.0078	0.00557	0.00034	0.030567	-0.05	35.7	2.2	39.6	7.6	180	320	35.7	2.2	UC Santa Cruz
15JLS015_3	8090	38	0.0453	0.0038	0.0374	0.0035	0.00587	0.00026	0.11733	0.1	37.8	1.7	37.2	3.4	20	150	37.8	1.7	UC Santa Cruz
15JLS015_4	1859	18	0.056	0.011	0.0404	0.0082	0.00559	0.00034	0.003737	-0.38	35.5	2.2	39.4	7.9	190	330	35.5	2.2	UC Santa Cruz
15JLS015_5	7490	-20	0.0464	0.0046	0.0325	0.0034	0.00524	0.00023	-0.029848	0.03	33.7	1.5	32.4	3.4	50	170	33.7	1.5	UC Santa Cruz
15JLS015_6	35510	-17	0.0476	0.0023	0.0372	0.0024	0.005681	0.00021	0.49312	-0.04	36.5	1.4	37	2.4	95	96	36.5	1.4	UC Santa Cruz
15JLS015_8	7	49																	UC Santa Cruz
15JLS015_9	46500	-12	0.0461	0.0021	0.02993	0.0018	0.004801	0.00018	0.14566	0.03	30.9	1.2	29.93	1.7	23	86	30.9	1.2	UC Santa Cruz
15JLS015_10	2720	12	0.0553	0.009	0.0452	0.0071	0.00592	0.00032	0.1576	-0.46	37.6	2.1	44.3	6.9	340	270	37.6	2.1	UC Santa Cruz
15JLS015_11	11110	14	0.0505	0.0038	0.0317	0.0026	0.00463	0.00019	0.04873	-0.17	29.6	1.2	31.7	2.6	230	140	29.6	1.2	UC Santa Cruz
15JLS015_12	22400	9	0.0467	0.0028	0.0303	0.0022	0.004785	0.00019	-0.049549	0	30.8	1.2	30.2	2.2	56	110	30.8	1.2	UC Santa Cruz
15JLS015_14	1720	21	0.07	0.017	0.049	0.011	0.00548	0.00034	-0.03473	-1	34.2	2.2	47	11	100	380	34.2	2.2	UC Santa Cruz
15JLS015_15	5580	44	0.0508	0.0053	0.036	0.0038	0.00525	0.00025	0.076711	-0.22	33.6	1.6	35.8	3.7	220	180	33.6	1.6	UC Santa Cruz
15JLS015_16	7600	3	0.0401	0.004	0.0312	0.0033	0.00579	0.00026	0.088541	0.33	37.5	1.7	31.4	3.3	-200	160	37.5	1.7	UC Santa Cruz
15JLS015_17	3700	-18	0.0499	0.0068	0.0325	0.0044	0.00468	0.00024	-0.11549	-0.23	30	1.6	33	4.2	230	230	30	1.6	UC Santa Cruz
15JLS015_18	23350	13	0.0477	0.0025	0.0347	0.0023	0.005372	0.0002	0.18547	-0.05	34.5	1.3	34.8	2.3	94	100	34.5	1.3	UC Santa Cruz
15JLS015_19	10700	-1	0.045	0.0059	0.0285	0.0038	0.00462	0.00024	0.05508	0.07	29.8	1.6	28.5	3.7	10	240	29.8	1.6	UC Santa Cruz	zoned:TRIM
15JLS015_20	9840	-19	0.052	0.0039	0.0331	0.0027	0.00463	0.00019	0.13288	-0.19	29.6	1.2	33	2.7	290	140	29.6	1.2	UC Santa Cruz
15JLS015_21	726	3	0.076	0.035	0.035	0.017	0.00519	0.00047	-0.19483	-1.16	32.1	3.3	31	16	-480	650	32.1	3.3	UC Santa Cruz	fair
15JLS015_22	3700	29	0.0413	0.0064	0.0274	0.0042	0.00493	0.00026	-0.095112	0.22	31.9	1.7	27.2	4.1	-60	230	31.9	1.7	UC Santa Cruz
15JLS015_23	4610	10	0.0533	0.0066	0.0377	0.0047	0.0052	0.00025	0.0011726	-0.34	33.2	1.6	37.8	4.6	290	200	33.2	1.6	UC Santa Cruz
15JLS015_24	4480	-17	0.0484	0.0068	0.033	0.0046	0.00512	0.00024	-0.0069949	-0.05	32.9	1.6	32.7	4.5	-30	210	32.9	1.6	UC Santa Cruz
15JLS015_25	9250	32	0.047	0.0043	0.0297	0.0029	0.00469	0.0002	0.08677	-0.02	30.1	1.3	29.7	2.8	70	160	30.1	1.3	UC Santa Cruz	zoned:TRIM
15JLS015_26	1050	31	0.064	0.016	0.0352	0.0095	0.00457	0.00032	0.08864	-0.65	28.7	2.1	33.9	9.3	340	420	28.7	2.1	UC Santa Cruz	fair
15JLS015_27	8850	32	0.0456	0.0038	0.0329	0.003	0.00523	0.00022	0.11411	0.02	33.7	1.4	33	3	10	150	33.7	1.4	UC Santa Cruz	fair
15JLS015_28	7340	-15	0.0462	0.0048	0.0289	0.0033	0.00448	0.0002	0.12957	0.01	28.8	1.3	28.8	3.3	60	170	28.8	1.3	UC Santa Cruz
15JLS015_29	101300	55	0.0473	0.0018	0.03565	0.002	0.005466	0.0002	0.48979	-0.03	35.1	1.3	35.64	1.9	74	77	35.1	1.3	UC Santa Cruz
15JLS015_30	6880	-3	0.0439	0.0056	0.0345	0.0044	0.00579	0.00028	0.058716	0.15	37.4	1.8	34.7	4.3	30	190	37.4	1.8	UC Santa Cruz
15JLS015_31	1640	-3	0.058	0.013	0.0369	0.0086	0.00481	0.00029	0.098155	-0.41	30.5	1.9	35.8	8.3	110	370	30.5	1.9	UC Santa Cruz
15JLS015_32	24880	10	0.0486	0.0026	0.0383	0.0026	0.005705	0.00022	0.16515	-0.08	36.6	1.4	38.1	2.5	121	100	36.6	1.4	UC Santa Cruz
15JLS015_33	37610	-22	0.0465	0.0022	0.0347	0.0022	0.005337	0.0002	0.17802	0.01	34.3	1.3	34.6	2.1	49	92	34.3	1.3	UC Santa Cruz
15JLS015_34	10340	9	0.0511	0.0039	0.0328	0.0028	0.00481	0.00021	0.19053	-0.19	30.8	1.3	33	2.7	210	140	30.8	1.3	UC Santa Cruz
15JLS015_35	1590	22	0.071	0.014	0.0508	0.0098	0.00503	0.00032	0.0014021	-1.05	31.4	2.1	49.2	9.4	590	370	31.4	2.1	UC Santa Cruz	fair
15JLS015_36	39380	33	0.0473	0.0021	0.0317	0.0019	0.004952	0.00018	0.23515	-0.02	31.8	1.2	31.6	1.9	75	88	31.8	1.2	UC Santa Cruz
15JLS015_37	9240	18	0.0478	0.0043	0.0327	0.0031	0.005	0.0002	0.12145	-0.01	32.1	1.3	32.6	3.1	70	160	32.1	1.3	UC Santa Cruz
15JLS015_38	2480	14	0.0546	0.01	0.0417	0.0074	0.0054	0.00028	0.012242	-0.33	34.4	1.8	40.8	7.2	360	300	34.4	1.8	UC Santa Cruz	fair
15JLS015_39	10680	19	0.0474	0.0036	0.0353	0.003	0.00521	0.00022	0.056179	-0.03	33.5	1.4	35.1	2.9	120	140	33.5	1.4	UC Santa Cruz
15JLS015_40	1390	5	0.036	0.014	0.028	0.011	0.00592	0.00041	0.11216	0.57	38.6	2.7	26	11	-310	410	38.6	2.7	UC Santa Cruz	fair
15JLS015_41	14530	-32	0.0446	0.0031	0.0363	0.0029	0.00573	0.00023	0.12467	0.07	36.9	1.5	36.2	2.8	-10	120	36.9	1.5	UC Santa Cruz
15JLS015_42	26990	60	0.0496	0.0042	0.0312	0.003	0.00449	0.0002	-0.22575	-0.13	28.8	1.3	31.2	3	150	160	28.8	1.3	UC Santa Cruz	zoned:DEL
15JLS015_43	28850	0	0.076	0.0032	1.6	0.097	0.1505	0.006	0.53553	0	903	34	964	38	1084	87	903	34	UC Santa Cruz	fair
15JLS015_44	1047	19	0.064	0.02	0.041	0.011	0.00445	0.00033	0.077814	-0.61	28	2.2	40	11	310	460	28	2.2	UC Santa Cruz	fair
15JLS015_45	2250	11	0.066	0.011	0.0439	0.0069	0.005	0.00031	-0.028838	-0.73	31.4	2	43	6.7	700	280	31.4	2	UC Santa Cruz	fair
15JLS015_46	3880	-38	0.044	0.013	0.0328	0.0098	0.00557	0.00043	-0.14765	0.13	35.9	2.8	32.4	9.6	-80	460	35.9	2.8	UC Santa Cruz	zoned:TRIM
15JLS015_47	1391	-28	0.053	0.015	0.036	0.011	0.00532	0.00037	0.060064	-0.27	33.9	2.4	34	10	-30	410	33.9	2.4	UC Santa Cruz	fair
15JLS015_48	723	21	0.091	0.033	0.04	0.014	0.0044	0.00042	-0.011764	-1.59	26.7	2.8	38	13	140	600	26.7	2.8	UC Santa Cruz	fair
15JLS015_49	2760	3	0.0528	0.0093	0.0382	0.0068	0.00545	0.00031	-0.063195	-0.23	34.8	2	37.4	6.6	90	270	34.8	2	UC Santa Cruz	fair
15JLS015_50	11770	-28	0.0483	0.0034	0.0378	0.0029	0.0056	0.00023	0.0043428	-0.09	35.9	1.5	37.6	2.8	120	120	35.9	1.5	UC Santa Cruz
15JLS015_51	9610	35	0.0475	0.0039	0.0301	0.0027	0.00462	0.00019	0.098864	-0.03	29.7	1.2	30.1	2.6	70	150	29.7	1.2	UC Santa Cruz
15JLS015_52	3420	32	0.0494	0.0066	0.0364	0.0049	0.00534	0.00025	0.060554	-0.08	34.2	1.6	36.5	4.7	170	220	34.2	1.6	UC Santa Cruz
15JLS015_53	1961	66	0.045	0.01	0.0383	0.0078	0.00543	0.00031	0.15144	0.09	35	2	37.4	7.6	30	310	35	2	UC Santa Cruz
15JLS015_54	2010	30	0.043	0.011	0.0304	0.0073	0.00542	0.00033	-0.099977	0.21	35	2.2	30.5	7	-60	330	35	2.2	UC Santa Cruz
15JLS015_55	9070	24	0.0479	0.0044	0.033	0.0033	0.00489	0.00021	0.17398	-0.02	31.4	1.4	32.9	3.3	120	170	31.4	1.4	UC Santa Cruz
15JLS015_56	1515	37	0.046	0.011	0.0315	0.0081	0.00536	0.00035	0.0049927	0.09	34.5	2.3	30.6	7.9	-140	350	34.5	2.3	UC Santa Cruz
15JLS015_57	10760	37	0.0438	0.0038	0.0295	0.0029	0.00473	0.00022	0.25409	0.11	30.5	1.4	29.4	2.8	-40	150	30.5	1.4	UC Santa Cruz	zoned:TRIM
15JLS015_58	2430	-9	0.053	0.01	0.0312	0.0058	0.00448	0.00025	-0.093349	-0.22	28.6	1.6	30.7	5.7	10	290	28.6	1.6	UC Santa Cruz	fair
15JLS015_59	24230	-20	0.0531	0.0029	0.257	0.016	0.03482	0.0013	0.041372	-0.65	220	8.2	231.1	13	313	110	220	8.2	UC Santa Cruz	fair
15JLS015_60	6710	-9	0.0537	0.0051	0.0344	0.0034	0.00465	0.0002	0.0027732	-0.27	29.6	1.3	34.3	3.4	270	180	29.6	1.3	UC Santa Cruz
15JLS015_61	7540	37	0.0495	0.0048	0.0392	0.0039	0.00576	0.00026	0.12702	-0.1	36.9	1.7	38.9	3.8	110	170	36.9	1.7	UC Santa Cruz
15JLS015_62	15180	40	0.1071	0.0092	0.0769	0.0078	0.00494	0.0002	0.52316	-2.42	29.3	1.2	74.6	7.4	1610	190	29.3	1.2	UC Santa Cruz	fair
15JLS015_63	2670	50	0.0482	0.0088	0.038	0.0071	0.00579	0.0003	0.025101	-0.05	37.1	2	37.2	6.9	20	290	37.1	2	UC Santa Cruz
15JLS015_64	2470	-7	0.051	0.012	0.0299	0.0078	0.00447	0.00023	-0.062441	-0.11	28.6	1.5	29.6	7.3	40	270	28.6	1.5	UC Santa Cruz	204 spk:TRIM
15JLS015_65	16630	-8	0.0442	0.0032	0.0289	0.0023	0.004611	0.00018	0.023046	0.1	29.7	1.2	28.9	2.3	-20	130	29.7	1.2	UC Santa Cruz
15JLS015_66	2840	18	0.0537	0.008	0.0409	0.006	0.00552	0.0003	0.077926	-0.33	35.2	1.9	40.2	5.8	120	240	35.2	1.9	UC Santa Cruz
15JLS015_67	13910	-1	0.0464	0.003	0.0303	0.0023	0.004585	0.00018	0.19218	0.01	29.5	1.2	30.3	2.2	50	120	29.5	1.2	UC Santa Cruz
15JLS015_68	5270	-17	0.0489	0.006	0.0335	0.0042	0.00498	0.00026	-0.029427	-0.17	31.9	1.7	33.7	4.1	130	200	31.9	1.7	UC Santa Cruz	fair
15JLS015_69	5370	25	0.0504	0.0054	0.0329	0.0036	0.00473	0.00022	0.039049	-0.13	30.3	1.4	32.8	3.5	150	190	30.3	1.4	UC Santa Cruz
15JLS015_70	25830	29	0.0627	0.0042	0.0478	0.0039	0.00538	0.00021	0.38435	-0.72	33.9	1.3	47.2	3.7	630	140	33.9	1.3	UC Santa Cruz
15JLS015_71	4950	12	0.0513	0.0061	0.0411	0.0048	0.00572	0.00026	-0.10531	-0.24	36.6	1.7	40.6	4.6	230	210	36.6	1.7	UC Santa Cruz
15JLS015_72	2070	12	0.059	0.011	0.0414	0.0085	0.00488	0.00029	0.10781	-0.51	30.9	1.9	40.4	8.1	430	320	30.9	1.9	UC Santa Cruz	zoned:TRIM
15JLS015_73	3120	-7	0.053	0.0071	0.0359	0.005	0.00489	0.00026	0.18013	-0.21	31.2	1.7	35.5	4.9	250	230	31.2	1.7	UC Santa Cruz
15JLS015_74	11400	-1	0.0444	0.0037	0.0304	0.0028	0.00484	0.0002	0.1642	0.1	31.2	1.3	30.3	2.8	-20	140	31.2	1.3	UC Santa Cruz
15JLS015_75	21380	24	0.0545	0.0035	0.04	0.0031	0.00528	0.00021	0.13456	-0.32	33.6	1.3	39.8	3	340	130	33.6	1.3	UC Santa Cruz
15JLS015_76	37400	-7	0.046	0.0022	0.0309	0.002	0.00487	0.00019	0.2764	0.02	31.3	1.2	30.9	2	30	93	31.3	1.2	UC Santa Cruz	fair
15JLS015_77	39500	33	0.0467	0.003	0.0251	0.0019	0.003672	0.00014	0.075951	-0.01	23.6	0.9	25.2	1.9	33	110	23.6	0.9	UC Santa Cruz	zoned:DEL
15JLS015_78	11230	38	0.0457	0.0038	0.0299	0.0028	0.00468	0.00019	0.14849	0.04	30.1	1.2	29.9	2.7	10	140	30.1	1.2	UC Santa Cruz
15JLS015_79	4920	10	0.046	0.011	0.0305	0.007	0.00494	0.00036	0.073316	-0.01	31.8	2.4	30.4	6.9	20	380	31.8	2.4	UC Santa Cruz	zoned:TRIM
15JLS015_80	3610	40	0.0575	0.0096	0.0451	0.0077	0.00567	0.00028	0.1221	-0.45	36	1.8	44.1	7.3	150	260	36	1.8	UC Santa Cruz
15JLS015_81	7420	-2	0.048	0.0047	0.0358	0.0036	0.00555	0.00025	-0.031714	-0.08	35.6	1.6	35.5	3.5	90	170	35.6	1.6	UC Santa Cruz
15JLS015_82	4090	10	0.0441	0.0053	0.0324	0.004	0.00522	0.00024	0.10029	0.07	33.7	1.6	32.6	4	0	190	33.7	1.6	UC Santa Cruz
15JLS015_83	2960	-15	0.049	0.011	0.033	0.0076	0.00508	0.0003	0.16473	-0.13	32.6	2	32.6	7.5	180	370	32.6	2	UC Santa Cruz	zoned:TRIM
15JLS015_84	20000	-18	0.0434	0.0028	0.0362	0.0027	0.00593	0.00024	0.094954	0.15	38.3	1.6	36	2.6	-73	110	38.3	1.6	UC Santa Cruz
15JLS015_85	2240	-12	0.054	0.013	0.0376	0.0094	0.00492	0.0003	0.08018	-0.25	31.3	2	36.8	9.2	160	430	31.3	2	UC Santa Cruz	zoned:TRIM
15JLS015_86	3600	11	0.0601	0.01	0.0306	0.0048	0.00344	0.00022	-0.076872	-0.34	21.8	1.4	30.5	4.7	500	320	21.8	1.4	UC Santa Cruz	zoned:DEL
15JLS015_87	11290	21	0.0492	0.0032	0.0337	0.0028	0.00491	0.0002	0.33416	-0.09	31.5	1.3	33.6	2.7	160	120	31.5	1.3	UC Santa Cruz
15JLS015_88	8260	13	0.0535	0.0046	0.0367	0.0034	0.00483	0.00022	0.095652	-0.25	30.8	1.4	36.5	3.3	330	160	30.8	1.4	UC Santa Cruz
15JLS015_89	3630	50	0.0442	0.0063	0.0272	0.0039	0.0044	0.00022	0.061029	0.09	28.4	1.4	27	3.9	10	210	28.4	1.4	UC Santa Cruz
15JLS015_90	10820	26	0.0434	0.0033	0.0275	0.0024	0.00453	0.00019	0.1873	0.01	29.3	1.2	27.7	2.3	-70	130	29.3	1.2	UC Santa Cruz
15JLS015_91	1595	-58	0.057	0.012	0.0416	0.0085	0.00534	0.00036	-0.092542	-0.41	33.9	2.3	41.3	8.4	310	340	33.9	2.3	UC Santa Cruz
15JLS015_92	20420	11	0.0455	0.0025	0.03	0.002	0.004707	0.00019	0.143	0.05	30.3	1.2	30.2	2	20	100	30.3	1.2	UC Santa Cruz
15JLS015_93	4470	42	0.0592	0.007	0.0372	0.0043	0.0047	0.00022	0.10748	-0.5	29.7	1.4	36.9	4.2	340	200	29.7	1.4	UC Santa Cruz
15JLS015_94	13600	12	0.0442	0.0032	0.0337	0.0028	0.00542	0.00024	0.10809	0.12	35	1.6	33.6	2.7	-20	130	35	1.6	UC Santa Cruz	fair
15JLS015_95	9800	10	0.072	0.013	0.056	0.016	0.00489	0.00022	-0.023293	-1.01	30.4	1.5	52	13	490	210	30.4	1.5	UC Santa Cruz
15JLS015_96	13300	47	0.0504	0.0054	0.036	0.004	0.00537	0.00029	0.17747	-0.14	34.4	1.9	36.6	3.7	210	210	34.4	1.9	UC Santa Cruz	zoned:TRIM
15JLS015_97	154400	54	0.1081	0.0037	4.127	0.22	0.2799	0.011	0.71675	0	1590	53	1661	45	1761	63	1761	63	UC Santa Cruz	76 good
15JLS015_98	2590	29	0.0476	0.0081	0.0301	0.0052	0.00484	0.00025	-0.016211	-0.01	31.1	1.6	30.3	5.2	-30	260	31.1	1.6	UC Santa Cruz
15JLS015_99	8280	16	0.0455	0.0042	0.0359	0.0035	0.00563	0.00025	0.22761	0.08	36.2	1.6	35.7	3.4	30	160	36.2	1.6	UC Santa Cruz
15JLS015_100	1286	-10	0.061	0.017	0.036	0.01	0.00515	0.00037	0.031167	-0.58	32.5	2.4	34.9	10	90	440	32.5	2.4	UC Santa Cruz
15JLS015_101	161500	25	0.1078	0.0036	2.576	0.14	0.1762	0.0067	0.77996	0	1045	37	1294	38	1761	60	1761	60	UC Santa Cruz	discordance
15JLS015_102	12200	9	0.0467	0.0034	0.0304	0.0025	0.00485	0.0002	0.16571	0.02	31.2	1.3	30.4	2.5	50	130	31.2	1.3	UC Santa Cruz	zoned:TRIM
15JLS015_103	2190	-3	0.0396	0.0082	0.0311	0.0063	0.00559	0.0003	-0.093327	0.36	36.3	2	30.6	6.2	-270	270	36.3	2	UC Santa Cruz	fair
15JLS015_104	3470	-18	0.0471	0.0079	0.0365	0.0063	0.0058	0.00033	-0.079535	-0.03	37.3	2.1	36	6.1	-60	260	37.3	2.1	UC Santa Cruz	zoned:TRIM
15JLS015_105	4300	46	0.0502	0.0055	0.0337	0.0036	0.00479	0.00024	0.071112	-0.13	30.7	1.5	33.6	3.6	190	180	30.7	1.5	UC Santa Cruz
15JLS015_106	53710	24	0.0452	0.0019	0.03435	0.002	0.005517	0.00021	0.37829	0.07	35.5	1.4	34.28	2	-15	79	35.5	1.4	UC Santa Cruz
15JLS015_107	3190	-8	0.0481	0.0082	0.0357	0.0059	0.00563	0.00029	-0.14207	-0.07	36.1	1.9	35.2	5.8	70	270	36.1	1.9	UC Santa Cruz
15JLS015_108	12770	31	0.0493	0.0031	0.0393	0.0028	0.00586	0.00024	0.050902	-0.22	37.5	1.5	39.1	2.8	160	120	37.5	1.5	UC Santa Cruz
15JLS015_109	25280	43	0.0506	0.0027	0.0323	0.0022	0.004697	0.00018	0.2526	-0.15	30.1	1.2	32.2	2.1	221	110	30.1	1.2	UC Santa Cruz
15JLS015_110	15960	-26	0.0492	0.0039	0.0528	0.0047	0.00791	0.00032	0.1134	-0.15	50.7	2.1	52.5	4.6	160	150	50.7	2.1	UC Santa Cruz	zoned:TRIM
15JLS015_111	5460	47	0.0486	0.0051	0.03	0.0032	0.00463	0.00021	0.061336	-0.1	29.7	1.4	30.2	3.2	130	180	29.7	1.4	UC Santa Cruz	fair
15JLS015_112	1399	22	0.078	0.02	0.048	0.013	0.00484	0.00036	0.84442	-1.21	29.9	2.4	43.2	10	200	390	29.9	2.4	UC Santa Cruz	fair
15JLS015_113	3310	-5	0.0496	0.0065	0.033	0.0043	0.00497	0.00026	0.062115	-0.06	31.8	1.7	32.8	4.2	120	220	31.8	1.7	UC Santa Cruz
15JLS015_114	7320	-34	0.0514	0.0047	0.0322	0.0032	0.00462	0.0002	-0.00067141	-0.17	29.5	1.3	32.1	3.1	240	170	29.5	1.3	UC Santa Cruz
15JLS015_115	8420	51	0.0459	0.0042	0.0308	0.0031	0.00502	0.00022	0.12473	0.06	32.3	1.4	30.7	3	-10	160	32.3	1.4	UC Santa Cruz
15JLS015_116	2960	-1	0.0482	0.008	0.0346	0.0058	0.00542	0.00027	0.10379	-0.02	34.8	1.8	34.1	5.7	-20	260	34.8	1.8	UC Santa Cruz
15JLS015_117	35200	48	0.0497	0.0024	0.0398	0.0026	0.00591	0.00023	0.34749	-0.14	37.8	1.5	39.6	2.5	177	100	37.8	1.5	UC Santa Cruz
15JLS015_118	9780	47	0.0499	0.0044	0.0322	0.0029	0.00475	0.0002	-0.12275	-0.12	30.4	1.3	31.8	2.8	170	140	30.4	1.3	UC Santa Cruz
15JLS015_119	28830	9	0.045	0.0023	0.0338	0.0022	0.005479	0.00021	-0.049213	0.08	35.3	1.4	33.7	2.2	-20	94	35.3	1.4	UC Santa Cruz
15JLS015_120	5410	20	0.0513	0.0053	0.037	0.0039	0.00539	0.00025	-0.011728	-0.15	34.5	1.6	37	3.8	180	180	34.5	1.6	UC Santa Cruz
15JLS015_121	2417	14	0.0446	0.0076	0.0333	0.006	0.00556	0.00029	0.031793	0.14	35.8	1.9	32.8	5.9	-10	260	35.8	1.9	UC Santa Cruz
15JLS015_122	151600	21	0.04678	0.0017	0.03015	0.0017	0.004731	0.00017	0.50923	-0.01	30.4	1.1	30.15	1.7	51	75	30.4	1.1	UC Santa Cruz
15JLS015_123	31100	9	0.0478	0.0029	0.0365	0.0026	0.00561	0.00023	0.16151	-0.05	36	1.5	36.4	2.6	90	110	36	1.5	UC Santa Cruz	fair
15JLS015_124	10770	46	0.0981	0.0072	0.0852	0.0074	0.00619	0.00026	0.25915	-2.57	37.2	1.6	82.6	6.9	1560	140	37.2	1.6	UC Santa Cruz	fair
15JLS015_125	7130	38	0.0437	0.0049	0.0282	0.0034	0.0048	0.00022	0.093518	0.09	31	1.4	28.1	3.3	-80	180	31	1.4	UC Santa Cruz	zoned:TRIM
15JLS015_126	5670	1	0.0444	0.0045	0.0345	0.0037	0.00569	0.00027	-0.2074	0.08	36.7	1.7	34.3	3.6	-50	170	36.7	1.7	UC Santa Cruz
15JLS015_127	9170	13	0.0481	0.0036	0.0307	0.0026	0.00471	0.00019	0.16729	-0.08	30.2	1.2	30.6	2.6	100	140	30.2	1.2	UC Santa Cruz
15JLS015_128	2730	40	0.0379	0.0075	0.0264	0.0054	0.00541	0.00029	-0.04099	0.37	35.2	1.9	26.7	5.4	-270	270	35.2	1.9	UC Santa Cruz
15JLS015_129	6330	42	0.0488	0.0048	0.0357	0.004	0.00548	0.00026	0.32035	-0.06	35.1	1.7	35.8	3.9	100	170	35.1	1.7	UC Santa Cruz
15JLS015_130	3140	10	0.0655	0.009	0.0474	0.0067	0.00543	0.00029	-0.063255	-0.82	34.1	1.9	46.5	6.5	430	250	34.1	1.9	UC Santa Cruz
15JLS015_131	2170	40	0.0396	0.0099	0.0239	0.0059	0.0045	0.00025	0.041237	0.3	29.2	1.7	23.5	5.8	-250	330	29.2	1.7	UC Santa Cruz
15JLS015_132	3340	51	0.0427	0.0068	0.0337	0.0052	0.00601	0.00032	-0.063142	0.23	38.8	2.1	33.9	5.2	-60	240	38.8	2.1	UC Santa Cruz
15JLS015_133	5150	-1	0.0521	0.0055	0.0319	0.0036	0.00461	0.00021	0.12448	-0.2	29.4	1.4	31.8	3.5	240	190	29.4	1.4	UC Santa Cruz
15JLS015_134	17330	6	0.0468	0.003	0.0297	0.0022	0.00464	0.00019	0.13945	0	29.8	1.2	29.6	2.2	60	120	29.8	1.2	UC Santa Cruz
15JLS015_136	4440	58	0.0424	0.006	0.028	0.0042	0.00507	0.00023	0.15152	0.18	32.8	1.5	27.8	4.2	-130	220	32.8	1.5	UC Santa Cruz	fair
15JLS015_137	18000	12	0.046	0.003	0.03	0.0023	0.004738	0.00019	0.18241	0.03	30.5	1.2	29.9	2.3	40	120	30.5	1.2	UC Santa Cruz
15JLS015_138	6600	23	0.0519	0.0062	0.0363	0.0042	0.0052	0.00025	0.038531	-0.19	33.2	1.6	36	4.1	200	180	33.2	1.6	UC Santa Cruz	fair
15JLS015_139	10950	32	0.0447	0.0038	0.0338	0.0031	0.00555	0.00022	0.09317	0.11	35.8	1.4	34	3	0	140	35.8	1.4	UC Santa Cruz
15JLS015_140	10280	10	0.0453	0.0034	0.0341	0.0029	0.00556	0.00022	0.14184	0.05	35.8	1.4	34	2.8	20	130	35.8	1.4	UC Santa Cruz
15JLS015_141	19210	64	0.0474	0.0025	0.0327	0.0022	0.005071	0.0002	0.053268	-0.03	32.6	1.3	32.6	2.1	104	99	32.6	1.3	UC Santa Cruz
15JLS015_142	2780	-34	0.0546	0.0087	0.0381	0.0059	0.00546	0.0003	0.080103	-0.35	34.8	1.9	37.5	5.8	280	250	34.8	1.9	UC Santa Cruz	fair
15JLS015_143	27700	-16	0.0448	0.0025	0.0287	0.0019	0.004638	0.00018	0.047843	0.07	29.9	1.2	28.7	1.9	-15	99	29.9	1.2	UC Santa Cruz
15JLS015_144	10060	9	0.0465	0.0036	0.0379	0.0033	0.00599	0.00024	0.14402	0.02	38.5	1.5	37.9	3.3	60	140	38.5	1.5	UC Santa Cruz
15JLS015_145	5220	-20	0.048	0.017	0.044	0.015	0.00633	0.00051	0.25323	0.02	40.6	3.4	43	14	130	620	40.6	3.4	UC Santa Cruz	zoned:TRIM
15JLS015_146	8660	40	0.0463	0.004	0.0302	0.0029	0.00484	0.00022	0.01258	0.03	31.1	1.4	30.2	2.8	40	150	31.1	1.4	UC Santa Cruz
15JLS015_147	33500	35	0.0477	0.0024	0.031	0.002	0.004876	0.00019	-0.18063	-0.05	31.3	1.2	31	1.9	92	95	31.3	1.2	UC Santa Cruz	fair
15JLS015_148	2980	-10	0.0444	0.0071	0.0359	0.0058	0.00578	0.00028	0.075645	0.16	37.3	1.8	35.4	5.7	50	250	37.3	1.8	UC Santa Cruz
15JLS015_149	4680	-14	0.0521	0.0071	0.0385	0.0051	0.00564	0.00027	-0.10356	-0.29	36	1.8	38.1	5	100	210	36	1.8	UC Santa Cruz
15JLS015_150	5140	45	0.0493	0.0056	0.0383	0.0045	0.0058	0.00027	0.064979	-0.24	37.2	1.7	38	4.4	140	190	37.2	1.7	UC Santa Cruz
15JLS015_151	6490	38	0.0542	0.0055	0.035	0.0037	0.00481	0.00021	-0.024866	-0.42	30.6	1.4	34.8	3.6	240	180	30.6	1.4	UC Santa Cruz
15JLS015_152	26700	1	0.046	0.0024	0.0296	0.002	0.00474	0.00019	0.18439	0.03	30.5	1.2	29.6	1.9	32	99	30.5	1.2	UC Santa Cruz
15JLS015_153	9910	-7	0.0473	0.0038	0.0307	0.0027	0.00488	0.00021	0.17839	-0.04	31.4	1.4	30.6	2.7	60	150	31.4	1.4	UC Santa Cruz
15JLS015_154	51500	22	0.0757	0.003	1.819	0.1	0.1779	0.007	0.42373	0	1055	39	1052	37	1080	81	1080	81	UC Santa Cruz
15JLS015_155	1800	48	0.0433	0.0092	0.0301	0.0058	0.00493	0.0003	0.10082	0.14	31.8	2	29.7	5.7	0	290	31.8	2	UC Santa Cruz
Humboldt Formation composite western section sample 15JLS017:
15JLS017_1	3390	26	0.0438	0.0067	0.0304	0.0045	0.00495	0.00027	-0.017135	0.15	31.9	1.8	30.5	4.5	10	230	31.9	1.8	UC Santa Cruz
15JLS017_2	1957	-8	0.0521	0.0096	0.0237	0.0044	0.00341	0.00018	0.079882	-0.13	21.8	1.2	24	4.5	160	300	21.8	1.2	UC Santa Cruz
15JLS017_3	13070	7	0.0446	0.0032	0.022	0.0018	0.003626	0.00015	0.010904	0.06	23.4	1	22.2	1.7	-20	130	23.4	1	UC Santa Cruz
15JLS017_4	3940	76	0.0538	0.0062	0.0419	0.0049	0.00585	0.00027	0.061903	-0.33	37.3	1.7	41.4	4.7	230	200	37.3	1.7	UC Santa Cruz
15JLS017_5	10430	-9	0.0453	0.0033	0.0207	0.0018	0.003412	0.00014	0.12387	0.03	22	0.9	20.8	1.8	10	130	22	0.9	UC Santa Cruz	fair
15JLS017_6	311000	29	0.04648	0.0016	0.02351	0.0013	0.003769	0.00014	0.71387	0	24.3	0.9	23.59	1.3	31	70	24.3	0.9	UC Santa Cruz
15JLS017_7	162000	32	0.1054	0.0036	2.364	0.13	0.1656	0.007	0.85951	0	986	39	1231	40	1727	64	986	39	UC Santa Cruz	76 good; discordance
15JLS017_8	2890	21	0.0632	0.0083	0.0299	0.004	0.0036	0.0002	0.039772	-0.45	22.7	1.3	29.7	4	650	230	22.7	1.3	UC Santa Cruz
15JLS017_9	18	22																	UC Santa Cruz
15JLS017_10	12230	41	0.0465	0.0035	0.0356	0.0029	0.00579	0.00024	0.0014504	0.03	37.2	1.5	35.7	2.9	50	140	37.2	1.5	UC Santa Cruz
15JLS017_11	145700	45	0.06387	0.0022	0.807	0.044	0.0939	0.0036	0.58644	-2.89	575.4	21.6	602.4	25	731	73	575.4	21.6	UC Santa Cruz
15JLS017_14	4400	54	0.0484	0.006	0.0222	0.0028	0.00357	0.00017	0.042278	-0.07	22.9	1.1	22.4	2.7	40	200	22.9	1.1	UC Santa Cruz
15JLS017_15	4810	22	0.0484	0.0058	0.0349	0.0045	0.00568	0.00027	0.15731	-0.06	36.4	1.7	35	4.3	40	200	36.4	1.7	UC Santa Cruz
15JLS017_16	3330	90	0.309	0.02	0.343	0.024	0.0083	0.00042	0.11486	-17.5	35.7	2.2	297	18	3449	110	35.7	2.2	UC Santa Cruz	high 207 corr
15JLS017_17	5770	-46	0.049	0.0053	0.0224	0.0024	0.00351	0.00017	0.0084706	-0.09	22.5	1.1	22.5	2.4	120	190	22.5	1.1	UC Santa Cruz
15JLS017_18	176800	31	0.092	0.0031	2.796	0.15	0.2251	0.0083	0.57973	0	1308	44	1355	39	1468	64	1468	64	UC Santa Cruz
15JLS017_19	165100	49	0.04758	0.0018	0.03694	0.002	0.005731	0.00021	0.36206	-0.04	36.8	1.3	36.83	2	86	78	36.8	1.3	UC Santa Cruz
15JLS017_20	9450	20	0.0604	0.0064	0.0297	0.0033	0.0036	0.0002	0.098983	-0.44	22.8	1.3	29.7	3.2	520	220	22.8	1.3	UC Santa Cruz	zoned:TRIM
15JLS017_21	22900	27	0.0466	0.0025	0.02061	0.0014	0.00327	0.00013	0.14087	-0.01	21	0.8	20.7	1.4	54	98	21	0.8	UC Santa Cruz
15JLS017_22	5900	9	0.0475	0.0045	0.024	0.0025	0.00382	0.00018	0.30975	-0.01	24.5	1.2	24	2.5	110	170	24.5	1.2	UC Santa Cruz
15JLS017_23	6120	34	0.048	0.0045	0.0943	0.0095	0.01448	0.00065	0.01657	-0.04	92.7	4.2	90.7	8.8	140	170	92.7	4.2	UC Santa Cruz
15JLS017_24	17160	64	0.0482	0.003	0.0363	0.0028	0.00564	0.00023	0.32151	-0.04	36.2	1.5	36.1	2.7	120	120	36.2	1.5	UC Santa Cruz
15JLS017_25	36000	9	0.048	0.0022	0.02586	0.0016	0.003938	0.00015	0.34652	-0.05	25.3	1	25.91	1.6	117	92	25.3	1	UC Santa Cruz
15JLS017_26	8030	11	0.0503	0.0041	0.0277	0.0025	0.00414	0.00018	0.14187	-0.09	26.5	1.2	27.6	2.5	170	150	26.5	1.2	UC Santa Cruz
15JLS017_27	259700	14	0.04813	0.0017	0.02462	0.0013	0.003781	0.00014	0.5316	-0.05	24.3	0.9	24.69	1.3	107	76	24.3	0.9	UC Santa Cruz
15JLS017_28	30010	0	0.0468	0.0026	0.02193	0.0014	0.003458	0.00013	0.16653	-0.01	22.2	0.8	22.11	1.5	59	100	22.2	0.8	UC Santa Cruz
15JLS017_29	30400	82	0.0471	0.0025	0.0347	0.0023	0.00548	0.00022	0.35883	-0.02	35.2	1.4	34.6	2.3	65	100	35.2	1.4	UC Santa Cruz
15JLS017_30	24510	30	0.0479	0.0028	0.0233	0.0016	0.003571	0.00014	0.61789	-0.04	22.9	0.9	23.3	1.6	98	110	22.9	0.9	UC Santa Cruz
15JLS017_31	6110	62	0.0449	0.0043	0.0221	0.0022	0.00358	0.00016	0.0091422	0.04	23.1	1	22.1	2.2	30	170	23.1	1	UC Santa Cruz
15JLS017_32	2121	58	0.0597	0.0099	0.0437	0.0073	0.00568	0.00031	0.15913	-0.58	35.9	2	42.8	7.1	410	270	35.9	2	UC Santa Cruz
15JLS017_33	9450	-33	0.0483	0.004	0.0358	0.0033	0.00553	0.00023	0.15296	-0.14	35.5	1.5	35.6	3.2	100	150	35.5	1.5	UC Santa Cruz
15JLS017_34	6880	50	0.044	0.0045	0.0331	0.0036	0.00555	0.00024	0.16239	0.15	35.8	1.6	32.9	3.6	-50	170	35.8	1.6	UC Santa Cruz
15JLS017_35	29600	45	0.0507	0.003	0.038	0.0027	0.0056	0.00022	0.3251	-0.16	35.8	1.4	37.9	2.7	220	120	35.8	1.4	UC Santa Cruz
15JLS017_36	7570	12	0.0622	0.0052	0.0323	0.003	0.00373	0.00017	0.16419	-0.47	23.5	1.1	32.2	3	640	170	23.5	1.1	UC Santa Cruz
15JLS017_37	23430	10	0.0608	0.0039	0.0452	0.0034	0.0056	0.00023	0.4057	-0.61	35.4	1.5	44.9	3.3	590	130	35.4	1.5	UC Santa Cruz
15JLS017_38	7550	43	0.0494	0.0047	0.0219	0.0021	0.003368	0.00015	0.065923	-0.08	21.6	1	22	2.1	120	160	21.6	1	UC Santa Cruz
15JLS017_39	1791	45	0.057	0.013	0.0182	0.004	0.00261	0.00016	-0.13029	-0.21	16.6	1.1	18.1	3.9	-50	330	16.6	1.1	UC Santa Cruz
15JLS017_40	5490	18	0.0539	0.0056	0.0185	0.002	0.002586	0.00012	0.014797	-0.16	16.5	0.8	18.5	2	310	190	16.5	0.8	UC Santa Cruz
15JLS017_41	7680	3	0.0454	0.0039	0.0277	0.0027	0.00444	0.0002	0.22966	0.05	28.6	1.3	27.6	2.6	20	150	28.6	1.3	UC Santa Cruz
15JLS017_42	15500	6	0.0487	0.0034	0.0239	0.0019	0.003577	0.00015	-0.01337	-0.07	23	1	23.9	1.9	150	130	23	1	UC Santa Cruz
15JLS017_43	4990	51	0.0479	0.0049	0.0164	0.0018	0.002568	0.00012	0.20609	-0.03	16.5	0.8	16.5	1.8	50	180	16.5	0.8	UC Santa Cruz
15JLS017_44	8670	8	0.0491	0.0043	0.0185	0.0018	0.002742	0.00013	0.11113	-0.06	17.6	0.8	18.6	1.7	150	150	17.6	0.8	UC Santa Cruz
15JLS017_45	6520	37	0.0437	0.0045	0.0204	0.0022	0.0034	0.00017	-0.12632	0.08	22	1.1	20.4	2.2	-50	170	22	1.1	UC Santa Cruz
15JLS017_46	2229	-22	0.0466	0.0084	0.0177	0.0031	0.00269	0.00015	-0.076719	0	17.3	1	17.7	3.1	120	290	17.3	1	UC Santa Cruz
15JLS017_47	1214	16	0.071	0.021	0.0254	0.0069	0.0027	0.00018	0.0070901	-0.51	16.8	1.2	24.8	6.7	-50	440	16.8	1.2	UC Santa Cruz
15JLS017_48	2820	76	0.055	0.0086	0.0247	0.0038	0.00344	0.00018	0.073213	-0.23	21.9	1.2	24.6	3.8	140	260	21.9	1.2	UC Santa Cruz
15JLS017_49	105200	8	0.0464	0.0018	0.0337	0.0019	0.005224	0.0002	0.43813	0.01	33.6	1.3	33.64	1.9	36	77	33.6	1.3	UC Santa Cruz
15JLS017_50	3950	46	0.0551	0.006	0.0263	0.0029	0.00345	0.00018	0.082454	-0.25	22	1.2	26.3	2.9	340	210	22	1.2	UC Santa Cruz
15JLS017_51	13360	60	0.0711	0.0054	0.0439	0.0039	0.004361	0.00018	0.27917	-0.87	27.2	1.1	43.5	3.8	820	160	27.2	1.1	UC Santa Cruz
15JLS017_52	13020	45	0.0493	0.004	0.0376	0.0036	0.00539	0.00022	0.31706	-0.09	34.5	1.4	37.3	3.5	170	150	34.5	1.4	UC Santa Cruz	fair
15JLS017_53	2750	55	0.0446	0.0095	0.0341	0.007	0.0056	0.00032	0.053174	0.1	36.1	2.1	33.4	6.9	-170	290	36.1	2.1	UC Santa Cruz
15JLS017_54	8420	10	0.0486	0.0046	0.0371	0.0037	0.00546	0.00024	-0.0028678	-0.07	35	1.5	36.9	3.6	70	160	35	1.5	UC Santa Cruz
15JLS017_55	10190	11	0.0473	0.0039	0.0221	0.0019	0.003344	0.00015	0.029735	-0.02	21.5	1	22.1	1.9	100	150	21.5	1	UC Santa Cruz
15JLS017_56	5400	29	0.0468	0.0052	0.0221	0.0024	0.00334	0.00016	0.0052255	-0.01	21.5	1	22.1	2.3	130	180	21.5	1	UC Santa Cruz
15JLS017_57	19400	46	0.0555	0.0041	0.185	0.016	0.02378	0.00094	0.30486	-1.21	150.3	5.9	171	13	340	140	150.3	5.9	UC Santa Cruz
15JLS017_58	5980	41	0.0465	0.005	0.0338	0.0039	0.00515	0.00023	0.028166	0.03	33.1	1.5	33.6	3.8	50	190	33.1	1.5	UC Santa Cruz
15JLS017_59	2105	60	0.056	0.01	0.0197	0.0036	0.0026	0.00015	0.031216	-0.19	16.5	1	19.6	3.6	210	300	16.5	1	UC Santa Cruz
15JLS017_60	93500	13	0.0787	0.0029	2.072	0.11	0.1861	0.007	0.44633	0	1100	38	1141	38	1159	74	1159	74	UC Santa Cruz
15JLS017_61	36780	21	0.0469	0.0022	0.0348	0.0021	0.005232	0.0002	0.17082	-0.01	33.6	1.3	34.7	2.1	56	91	33.6	1.3	UC Santa Cruz
15JLS017_62	3750	-41	0.0595	0.0062	0.0444	0.005	0.00535	0.00026	0.25813	-0.56	33.8	1.7	43.9	4.9	510	200	33.8	1.7	UC Santa Cruz
15JLS017_63	83400	29	0.0816	0.003	2.182	0.12	0.1918	0.0073	0.63403	0	1131	39	1171	39	1230	71	1230	71	UC Santa Cruz
15JLS017_64	4820	-10	0.0491	0.0055	0.0261	0.0032	0.00364	0.00017	0.26734	-0.05	23.3	1.1	26	3.1	140	200	23.3	1.1	UC Santa Cruz
15JLS017_65	1810	26	0.064	0.013	0.0231	0.0047	0.00274	0.00017	0.18054	-0.36	17.2	1.1	22.9	4.7	450	350	17.2	1.1	UC Santa Cruz
15JLS017_66	3710	-34	0.0475	0.006	0.0219	0.003	0.00336	0.00018	0.12531	-0.01	21.6	1.2	21.9	3	90	200	21.6	1.2	UC Santa Cruz
15JLS017_67	13450	59	0.0447	0.0028	0.0343	0.0026	0.00541	0.00023	0.22865	0.08	34.9	1.5	34.2	2.5	-15	110	34.9	1.5	UC Santa Cruz
15JLS017_68	5490	1	0.0618	0.006	0.0307	0.0031	0.00353	0.00016	0.0074621	-0.46	22.3	1	30.9	3.1	530	190	22.3	1	UC Santa Cruz
15JLS017_69	8320	35	0.0512	0.0043	0.0173	0.0015	0.002511	0.00011	-0.064303	-0.1	16.1	0.7	17.6	1.6	230	150	16.1	0.7	UC Santa Cruz
15JLS017_70	6080	-11	0.0526	0.0047	0.0382	0.0037	0.00519	0.00023	0.27006	-0.26	33.1	1.5	37.9	3.6	260	170	33.1	1.5	UC Santa Cruz
15JLS017_71	4090	-18	0.0544	0.0064	0.0394	0.0046	0.00551	0.0003	-0.11007	-0.32	35.1	1.9	39	4.4	260	210	35.1	1.9	UC Santa Cruz
15JLS017_72	15200	-18	0.0432	0.0031	0.0315	0.0025	0.00536	0.00022	0.14452	0.13	34.6	1.4	31.6	2.5	-70	120	34.6	1.4	UC Santa Cruz
15JLS017_74	9420	13	0.0482	0.0037	0.0228	0.002	0.003335	0.00014	0.24726	-0.04	21.4	0.9	22.8	2	150	140	21.4	0.9	UC Santa Cruz
15JLS017_75	23250	22	0.0455	0.0024	0.02203	0.0015	0.003534	0.00013	0.44928	0.03	22.8	0.8	22.11	1.5	-3	95	22.8	0.8	UC Santa Cruz
15JLS017_76	3090	42	0.0406	0.0063	0.0157	0.0025	0.00278	0.00015	0.17877	0.11	18	1	15.8	2.5	-160	220	18	1	UC Santa Cruz
15JLS017_77	15970	-8	0.0449	0.003	0.0339	0.0025	0.00549	0.00022	0.063241	0.08	35.4	1.4	34	2.5	20	120	35.4	1.4	UC Santa Cruz
15JLS017_78	17020	34	0.048	0.0031	0.0225	0.0016	0.003339	0.00013	0.11521	-0.04	21.4	0.8	22.6	1.6	110	120	21.4	0.8	UC Santa Cruz
15JLS017_79	2810	-3	0.0539	0.0084	0.0259	0.0042	0.00367	0.0002	-0.017015	-0.24	23.4	1.3	25.8	4.1	200	260	23.4	1.3	UC Santa Cruz
15JLS017_80	5190	-30	0.0553	0.0053	0.0262	0.0026	0.00344	0.00017	0.082812	-0.28	21.9	1.1	26.2	2.6	330	180	21.9	1.1	UC Santa Cruz
15JLS017_81	1592	31	0.054	0.013	0.0257	0.0058	0.00348	0.00024	0.015707	-0.22	22.2	1.6	25.3	5.7	140	350	22.2	1.6	UC Santa Cruz
15JLS017_82	2450	25	0.056	0.0078	0.042	0.0058	0.00555	0.00031	0.017549	-0.44	35.3	2	41.4	5.7	450	250	35.3	2	UC Santa Cruz
15JLS017_83	4060	86	0.0456	0.0054	0.0213	0.0026	0.00339	0.00018	0.02626	0	21.8	1.2	21.3	2.6	10	180	21.8	1.2	UC Santa Cruz
15JLS017_84	70100	14	0.0469	0.0019	0.0343	0.002	0.00534	0.0002	0.39206	-0.01	34.3	1.3	34.23	1.9	68	81	34.3	1.3	UC Santa Cruz
15JLS017_85	235400	85	0.0626	0.0024	0.688	0.039	0.0806	0.0032	0.52153	-3.24	496.5	19.3	531	24	703	85	496.5	19.3	UC Santa Cruz	204 spk:TRIM
15JLS017_86	15530	22	0.0495	0.0031	0.1643	0.012	0.02399	0.001	0.083899	-0.05	152.7	6.3	153.8	10	180	120	152.7	6.3	UC Santa Cruz
15JLS017_87	12600	-14	0.0471	0.0036	0.0228	0.0019	0.003618	0.00015	0.19337	-0.02	23.3	1	23.1	1.9	80	140	23.3	1	UC Santa Cruz
15JLS017_88	6690	-7	0.0428	0.0048	0.0317	0.0037	0.00566	0.00026	0.096463	0.17	36.6	1.7	31.5	3.6	-80	180	36.6	1.7	UC Santa Cruz
15JLS017_89	19400	16	0.0453	0.003	0.0345	0.0027	0.00559	0.00022	0.093634	0.07	36	1.4	34.4	2.6	0	120	36	1.4	UC Santa Cruz
15JLS017_90	3440	-1	0.0483	0.0062	0.023	0.0032	0.00348	0.00018	0.23066	-0.03	22.3	1.2	23	3.2	120	200	22.3	1.2	UC Santa Cruz
15JLS017_91	5800	-14	0.0459	0.005	0.0219	0.0024	0.00355	0.00016	0.084825	0.04	22.9	1	21.9	2.4	50	180	22.9	1	UC Santa Cruz
15JLS017_92	1580	18	0.053	0.012	0.0239	0.0055	0.00342	0.00023	-0.1135	-0.17	21.8	1.5	23.6	5.5	100	370	21.8	1.5	UC Santa Cruz
15JLS017_93	5470	28	0.0503	0.0051	0.0228	0.0024	0.003341	0.00015	-0.020301	-0.1	21.4	1	22.8	2.4	200	190	21.4	1	UC Santa Cruz
15JLS017_94	8250	42	0.0468	0.004	0.0352	0.0032	0.00553	0.00024	0.026338	0.01	35.5	1.6	35	3.2	60	150	35.5	1.6	UC Santa Cruz
15JLS017_95	4840	79	0.0498	0.0059	0.0217	0.0026	0.00328	0.00016	-0.0066304	-0.07	21	1	21.8	2.6	110	200	21	1	UC Santa Cruz
15JLS017_96	18100	1	0.0469	0.0028	0.0359	0.0027	0.00548	0.00022	0.18728	0.01	35.2	1.4	35.7	2.6	86	110	35.2	1.4	UC Santa Cruz
15JLS017_97	2630	21	0.0508	0.0079	0.0269	0.0042	0.00386	0.0002	0.0093299	-0.13	24.7	1.3	26.7	4.1	190	260	24.7	1.3	UC Santa Cruz
15JLS017_99	37110	30	0.0452	0.0022	0.0353	0.0023	0.005616	0.00021	0.32682	0.07	36.2	1.4	35.2	2.2	-11	90	36.2	1.4	UC Santa Cruz
15JLS017_100	5120	17	0.0528	0.0054	0.0392	0.0042	0.00549	0.00026	0.079914	-0.28	35	1.7	38.8	4.1	310	190	35	1.7	UC Santa Cruz
15JLS017_101	2770	11	0.0554	0.0086	0.0384	0.006	0.00569	0.0003	0.051124	-0.42	36.2	1.9	38.4	5.9	310	260	36.2	1.9	UC Santa Cruz
15JLS017_102	2770	-8	0.055	0.0088	0.0209	0.0034	0.00288	0.00014	0.039452	-0.21	18.3	0.9	20.8	3.4	140	260	18.3	0.9	UC Santa Cruz
15JLS017_103	4790	29	0.0493	0.0054	0.0232	0.0026	0.00342	0.00016	-0.033775	-0.07	21.9	1	23.2	2.6	190	200	21.9	1	UC Santa Cruz
15JLS017_104	7660	14	0.0489	0.0042	0.0369	0.0033	0.00556	0.00024	-0.093105	-0.11	35.6	1.5	36.7	3.3	120	150	35.6	1.5	UC Santa Cruz
15JLS017_105	12560	64	0.0602	0.0049	0.0298	0.0027	0.003638	0.00015	0.1837	-0.41	23	1	29.8	2.7	520	160	23	1	UC Santa Cruz
15JLS017_106	15340	50	0.0472	0.0055	0.0361	0.0047	0.00569	0.00025	0.3149	0	36.6	1.6	35.9	4.6	80	210	36.6	1.6	UC Santa Cruz	zoned:TRIM
15JLS017_107	4410	-23	0.057	0.0064	0.0344	0.0041	0.00447	0.00021	0.13057	-0.35	28.4	1.4	34.2	4	390	210	28.4	1.4	UC Santa Cruz	fair
15JLS017_108	4760	23	0.053	0.0057	0.0247	0.0028	0.00337	0.00015	0.08769	-0.2	21.5	1	24.7	2.7	270	180	21.5	1	UC Santa Cruz	fair
15JLS017_109	2050	17	0.056	0.012	0.0198	0.0048	0.00293	0.00019	0.051613	-0.17	18.6	1.2	20.6	4.9	200	340	18.6	1.2	UC Santa Cruz
15JLS017_110	131800	-8	0.0967	0.0034	3.381	0.18	0.2545	0.0094	0.51593	0	1461	48	1504	41	1558	66	1558	66	UC Santa Cruz
15JLS017_111	2100	-2	0.19	0.25	0.056	0.072	0.00264	0.00016	0.87819	-3.07	13.9	5.4	20.1	3.1	550	690	13.9	5.4	UC Santa Cruz	high 207 corr
15JLS017_112	3560	18	0.0527	0.007	0.0191	0.0025	0.00282	0.00014	-0.03415	-0.15	18	0.9	19.1	2.5	220	230	18	0.9	UC Santa Cruz
15JLS017_113	3080	60	0.0422	0.0076	0.0307	0.0057	0.00584	0.0003	0.0052102	0.25	37.8	2	30.2	5.6	-120	260	37.8	2	UC Santa Cruz
15JLS017_114	14630	-34	0.0439	0.0033	0.0326	0.0027	0.00548	0.00022	-0.084586	0.13	35.4	1.4	32.5	2.6	-80	120	35.4	1.4	UC Santa Cruz
15JLS017_115	20770	-8	0.0473	0.0031	0.0345	0.0026	0.00536	0.00021	0.3437	0	34.4	1.4	34.3	2.6	60	120	34.4	1.4	UC Santa Cruz
15JLS017_116	5330	45	0.0476	0.0054	0.0229	0.0026	0.00362	0.00017	-0.0026136	-0.05	23.3	1.1	22.9	2.6	30	190	23.3	1.1	UC Santa Cruz
15JLS017_117	66980	26	0.0477	0.0021	0.0334	0.002	0.005143	0.00019	0.43166	-0.04	33	1.2	33.3	2	91	86	33	1.2	UC Santa Cruz
15JLS017_118	3540	57	0.0437	0.0062	0.022	0.0033	0.00353	0.00017	0.11175	0.06	22.8	1.1	22	3.2	-20	220	22.8	1.1	UC Santa Cruz
15JLS017_119	19860	32	0.0528	0.0029	0.0385	0.0026	0.00537	0.00021	0.30336	-0.28	34.3	1.3	38.3	2.5	309	110	34.3	1.3	UC Santa Cruz
15JLS017_120	13560	13	0.0462	0.0032	0.022	0.0017	0.003501	0.00014	0.057193	0.01	22.5	0.9	22.2	1.7	60	130	22.5	0.9	UC Santa Cruz
15JLS017_121	13820	46	0.056	0.0037	0.0439	0.0034	0.00579	0.00025	0.21996	-0.4	36.8	1.6	43.5	3.3	420	130	36.8	1.6	UC Santa Cruz
15JLS017_122	10980	16	0.0502	0.0047	0.0385	0.0038	0.00557	0.00023	0.10163	-0.17	35.7	1.5	38.2	3.7	100	140	35.7	1.5	UC Santa Cruz
15JLS017_123	5500	73	0.0476	0.0046	0.0236	0.0024	0.00351	0.00016	0.16981	-0.05	22.6	1	23.7	2.4	90	170	22.6	1	UC Santa Cruz
15JLS017_124	19600	13	0.047	0.0028	0.0232	0.0017	0.003605	0.00015	0.17579	-0.01	23.2	1	23.2	1.7	68	110	23.2	1	UC Santa Cruz
15JLS017_125	6700	4	0.0514	0.0043	0.0398	0.0036	0.00565	0.00025	0.051987	-0.24	36.1	1.6	39.5	3.5	220	160	36.1	1.6	UC Santa Cruz
15JLS017_126	20380	35	0.0438	0.0027	0.0203	0.0015	0.003311	0.00014	0.30532	0.07	21.4	0.9	20.4	1.5	-36	110	21.4	0.9	UC Santa Cruz
15JLS017_127	3390	39	0.0514	0.0067	0.0245	0.0032	0.00367	0.00018	-0.0050117	-0.12	23.5	1.2	24.4	3.2	140	220	23.5	1.2	UC Santa Cruz
15JLS017_128	6400	51	0.0467	0.005	0.0224	0.0025	0.00366	0.00017	0.13036	0.01	23.5	1.1	22.4	2.5	20	180	23.5	1.1	UC Santa Cruz
15JLS017_129	9410	-40	0.0462	0.0038	0.0351	0.0032	0.00565	0.00025	0.068236	0	36.3	1.6	35.2	3	20	140	36.3	1.6	UC Santa Cruz
15JLS017_131	13750	5	0.05	0.011	0.0313	0.006	0.00474	0.00033	-0.1292	-0.15	30.4	2.2	31.2	5.8	80	270	30.4	2.2	UC Santa Cruz	zoned:TRIM (inclusion?)
15JLS017_132	6610	29	0.096	0.011	0.084	0.011	0.00604	0.00029	0.38232	-2.39	36.4	1.8	80.7	9.8	1270	240	36.4	1.8	UC Santa Cruz	fair
15JLS017_133	4110	-3	0.0541	0.0065	0.0428	0.0054	0.00591	0.00029	0.12974	-0.36	37.6	1.9	42.7	5.2	340	210	37.6	1.9	UC Santa Cruz	fair
15JLS017_134	2120	15	0.0494	0.0086	0.433	0.076	0.0627	0.0042	0.1457	3.46	394.5	26.3	376	53	200	270	394.5	26.3	UC Santa Cruz
15JLS017_135	12230	47	0.0459	0.0033	0.0357	0.0029	0.00554	0.00024	0.12088	0.03	35.7	1.5	35.5	2.9	40	130	35.7	1.5	UC Santa Cruz
15JLS017_136	78000	27	0.0464	0.0023	0.0344	0.0024	0.00557	0.00026	0.47531	0.02	35.8	1.7	34.3	2.3	37	99	35.8	1.7	UC Santa Cruz	zoned:TRIM
Humboldt Formation composite western section sample 15JLS027A:
15JLS027A_1	5850	48	0.065	0.0069	0.0518	0.0056	0.00596	0.00031	0.03167	-0.87	37.4	2	50.9	5.3	530	200	37.4	2	UC Santa Cruz
15JLS027A_2	7680	14	0.0463	0.0039	0.0356	0.0034	0.00572	0.00027	0.15521	-0.01	36.8	1.7	35.7	3.4	60	150	36.8	1.7	UC Santa Cruz
15JLS027A_3	56950	86	0.0488	0.0021	0.1623	0.0097	0.02415	0.00093	0.36373	0.09	153.9	5.9	152.4	8.5	142	89	153.9	5.9	UC Santa Cruz
15JLS027A_4	6380	22	0.0439	0.004	0.0335	0.0035	0.0056	0.00026	0.277	0.13	36.1	1.7	33.7	3.4	-40	160	36.1	1.7	UC Santa Cruz
15JLS027A_5	8980	31	0.088	0.0083	0.0812	0.0088	0.00636	0.00027	0.30528	-2.15	38.7	1.7	78.5	8.2	1200	190	38.7	1.7	UC Santa Cruz
15JLS027A_6	11400	57	0.0485	0.0039	0.0397	0.0036	0.00583	0.00024	0.20144	-0.08	37.4	1.5	39.4	3.5	90	140	37.4	1.5	UC Santa Cruz
15JLS027A_7	14140	71	0.0506	0.0038	0.0395	0.0033	0.00564	0.00025	-0.040835	-0.12	36.1	1.6	39.3	3.2	170	130	36.1	1.6	UC Santa Cruz
15JLS027A_8	3490	170	0.614	0.034	1.964	0.12	0.02311	0.0013	0.27609	-104.2	43	6.8	1095	41	4537	87	43	6.8	UC Santa Cruz	fair; high 207 corr
15JLS027A_9	22530	-11	0.0502	0.0033	0.0394	0.0032	0.00553	0.0003	0.3648	-0.11	35.4	1.9	39.6	3.1	220	140	35.4	1.9	UC Santa Cruz	zoned:TRIM
15JLS027A_10	8430	90	0.0849	0.0082	0.0713	0.0079	0.006	0.00029	0.40576	-1.79	36.7	1.8	69.3	7.4	1100	200	36.7	1.8	UC Santa Cruz
15JLS027A_11	5200	216	0.648	0.033	2.383	0.14	0.02714	0.0013	0.31903	-129.15	43.3	7.5	1242	42	4609	79	43.3	7.5	UC Santa Cruz	fair; high 207 corr
15JLS027A_12	3200	24	0.0503	0.0079	0.0407	0.0063	0.00593	0.0003	0.05262	-0.15	37.9	2	40.1	6.1	80	240	37.9	2	UC Santa Cruz
15JLS027A_13	1170	64	0.845	0.075	11.59	1.1	0.107	0.011	0.67875	-618.51	29.5	61.9	2550	91	5060	180	29.5	61.9	UC Santa Cruz	high 207 corr
15JLS027A_14	7080	8	0.0465	0.0043	0.0361	0.0035	0.00555	0.00025	-0.040063	-0.01	35.7	1.6	35.9	3.4	50	160	35.7	1.6	UC Santa Cruz
15JLS027A_15	-17	71																	UC Santa Cruz
15JLS027A_16	4190	42	0.0611	0.007	0.0497	0.006	0.00577	0.0003	0.094995	-0.68	36.4	1.9	49.3	5.7	610	210	36.4	1.9	UC Santa Cruz
15JLS027A_17	6450	44	0.0516	0.0052	0.0416	0.0045	0.00574	0.00027	0.1778	-0.33	36.7	1.7	41.2	4.4	210	180	36.7	1.7	UC Santa Cruz
15JLS027A_18	7340	-2	0.0472	0.0044	0.0393	0.0041	0.00607	0.00029	0.028803	-0.01	39	1.9	38.9	4	20	160	39	1.9	UC Santa Cruz
15JLS027A_19	5070	70	0.0477	0.0058	0.0383	0.0047	0.00579	0.00027	0.060358	-0.03	37.2	1.8	37.9	4.6	140	200	37.2	1.8	UC Santa Cruz
15JLS027A_20	11820	-22	0.0463	0.0036	0.0388	0.0033	0.00589	0.00025	-0.068809	0	37.9	1.6	38.5	3.2	80	140	37.9	1.6	UC Santa Cruz
15JLS027A_21	5580	-2	0.0549	0.0052	0.0433	0.0041	0.00569	0.00029	0.094909	-0.4	36.2	1.9	42.9	4	370	170	36.2	1.9	UC Santa Cruz
15JLS027A_22	5010	3	0.0474	0.0054	0.0356	0.0043	0.00553	0.00028	0.17284	0.02	35.5	1.8	35.8	4.3	80	200	35.5	1.8	UC Santa Cruz
15JLS027A_23	5020	2	0.0522	0.0061	0.0394	0.0047	0.00556	0.00027	0.14891	-0.3	35.5	1.7	39	4.5	160	200	35.5	1.7	UC Santa Cruz
15JLS027A_24	5490	14	0.0503	0.0052	0.038	0.0039	0.00559	0.00026	-0.092437	-0.13	35.8	1.7	37.7	3.8	120	180	35.8	1.7	UC Santa Cruz
15JLS027A_25	13490	26	0.0517	0.0042	0.0418	0.0039	0.00582	0.00026	-0.06846	-0.22	37.2	1.7	41.4	3.8	200	150	37.2	1.7	UC Santa Cruz
15JLS027A_26	6010	4	0.0481	0.0044	0.0369	0.0036	0.00574	0.00027	0.19675	-0.07	36.8	1.7	36.7	3.6	80	160	36.8	1.7	UC Santa Cruz
15JLS027A_27	5330	33	0.0514	0.0058	0.0448	0.0052	0.00621	0.00031	0.055969	-0.22	39.7	2	44.2	5	200	200	39.7	2	UC Santa Cruz
15JLS027A_28	15110	-10	0.0432	0.0029	0.0339	0.0027	0.00564	0.00026	0.2718	0.12	36.4	1.7	34	2.6	-70	120	36.4	1.7	UC Santa Cruz	fair
15JLS027A_29	8480	23	0.0461	0.0041	0.0366	0.0036	0.00553	0.00024	0.21472	0.01	35.6	1.6	36.7	3.5	50	150	35.6	1.6	UC Santa Cruz
15JLS027A_30	19210	-12	0.046	0.0028	0.0363	0.0027	0.00563	0.00023	0.17087	0.01	36.2	1.5	36.1	2.6	30	110	36.2	1.5	UC Santa Cruz
15JLS027A_31	7440	29	0.0471	0.0049	0.0372	0.004	0.0058	0.00026	0.021519	-0.03	37.3	1.7	36.9	4	40	180	37.3	1.7	UC Santa Cruz
15JLS027A_32	6750	234	0.603	0.028	1.968	0.12	0.02319	0.001	0.31589	-102.5	45.2	5.6	1105	38	4512	71	45.2	5.6	UC Santa Cruz	high 207 corr
15JLS027A_33	21580	26	0.0755	0.0041	1.874	0.13	0.1798	0.0079	0.344	0	1064	43	1068	45	1044	110	1044	110	UC Santa Cruz
15JLS027A_34	6040	44	0.0489	0.0053	0.0396	0.0043	0.00575	0.00027	0.004176	-0.14	36.9	1.7	39.3	4.2	160	190	36.9	1.7	UC Santa Cruz
15JLS027A_35	780	37																	UC Santa Cruz
15JLS027A_36	29	59																	UC Santa Cruz
15JLS027A_37	20460	59	0.046	0.0028	0.0342	0.0025	0.00531	0.00023	0.41238	0.02	34.2	1.5	34.1	2.5	19	110	34.2	1.5	UC Santa Cruz	fair
15JLS027A_38	9940	29	0.0492	0.0045	0.0271	0.0026	0.00395	0.00018	0.025922	-0.06	25.3	1.2	27.1	2.6	140	160	25.3	1.2	UC Santa Cruz	fair
15JLS027A_39	8620	-2	0.0421	0.0036	0.0338	0.0032	0.00561	0.00025	0.11819	0.21	36.3	1.6	33.6	3.1	-140	140	36.3	1.6	UC Santa Cruz
15JLS027A_40	21380	22	0.0449	0.0025	0.034	0.0024	0.00541	0.00023	0.41555	0.07	34.9	1.5	34	2.4	-9	100	34.9	1.5	UC Santa Cruz
15JLS027A_41	6340	6	0.0519	0.0047	0.0402	0.0041	0.00568	0.00026	0.26177	-0.23	36.3	1.7	40.2	3.9	230	170	36.3	1.7	UC Santa Cruz
15JLS027A_42	18660	5	0.0461	0.0028	0.0352	0.0025	0.00546	0.00023	0.12687	0.05	35.1	1.5	35.1	2.5	32	110	35.1	1.5	UC Santa Cruz
15JLS027A_43	6630	13	0.0425	0.0045	0.0352	0.0038	0.00589	0.00028	0.05527	0.06	38.1	1.8	35	3.7	-90	160	38.1	1.8	UC Santa Cruz
15JLS027A_44	9060	36	0.056	0.0076	0.0464	0.0072	0.00609	0.00028	0.62588	-0.41	38.7	1.8	45.5	6.7	280	210	38.7	1.8	UC Santa Cruz
15JLS027A_45	8200	13	0.0444	0.0046	0.0356	0.0039	0.00615	0.0003	0.062952	0.14	39.6	1.9	35.4	3.8	-70	170	39.6	1.9	UC Santa Cruz	zoned:TRIM
15JLS027A_46	2880	-7	0.0479	0.0076	0.0379	0.006	0.00585	0.00032	0.017443	-0.05	37.5	2.1	37.3	5.9	10	250	37.5	2.1	UC Santa Cruz
15JLS027A_47	15580	34	0.0485	0.0032	0.0376	0.0028	0.00566	0.00023	0.12584	-0.08	36.3	1.5	37.5	2.8	130	120	36.3	1.5	UC Santa Cruz
15JLS027A_48	37300	13	0.0453	0.0022	0.0358	0.0023	0.0057	0.00023	0.27669	0.07	36.7	1.5	35.6	2.2	-6	93	36.7	1.5	UC Santa Cruz
15JLS027A_49	17130	14	0.0485	0.0031	0.0368	0.0028	0.00553	0.00023	0.16102	-0.06	35.5	1.5	36.6	2.7	110	120	35.5	1.5	UC Santa Cruz
15JLS027A_50	9570	11	0.0726	0.0053	0.0628	0.0055	0.00625	0.00029	0.41241	-1.34	38.9	1.8	61.6	5.3	890	160	38.9	1.8	UC Santa Cruz	fair
15JLS027A_52	5400	-30	0.0471	0.0055	0.0379	0.0046	0.0058	0.00028	0.09464	-0.03	37.3	1.8	38.3	4.5	30	190	37.3	1.8	UC Santa Cruz
15JLS027A_53	4040	-5	0.0486	0.007	0.0369	0.0052	0.00572	0.00028	0.060077	-0.02	36.7	1.8	36.5	5.1	40	230	36.7	1.8	UC Santa Cruz
15JLS027A_54	17330	-12	0.0458	0.003	0.0374	0.003	0.006	0.00025	0.35022	0.04	38.6	1.6	37.2	3	50	120	38.6	1.6	UC Santa Cruz
15JLS027A_55	11910	-20	0.047	0.0037	0.0356	0.0031	0.00546	0.00024	0.13086	-0.02	35.1	1.5	35.4	3	50	140	35.1	1.5	UC Santa Cruz
15JLS027A_56	4640	217	0.66	0.035	2.251	0.13	0.0248	0.0013	0.20715	-120.72	37.1	7.2	1202	39	4625	86	37.1	7.2	UC Santa Cruz	high 207 corr
15JLS027A_57	4790	20	0.0562	0.006	0.0439	0.0048	0.00576	0.00028	0.019015	-0.42	36.6	1.8	43.4	4.6	360	200	36.6	1.8	UC Santa Cruz
15JLS027A_58	3540	44	0.0425	0.0066	0.0333	0.005	0.00584	0.00029	-0.045258	0.24	37.7	1.9	33.4	4.9	-40	240	37.7	1.9	UC Santa Cruz
15JLS027A_59	271800	0	0.083	0.0028	2.434	0.14	0.2127	0.0085	0.82617	0	1242	45	1252	40	1267	67	1267	67	UC Santa Cruz
15JLS027A_60	1730	24	0.056	0.012	0.0467	0.0097	0.00611	0.00044	0.016881	-0.49	38.8	2.9	47.4	9.7	320	330	38.8	2.9	UC Santa Cruz	fair
15JLS027A_61	61920	-11	0.0472	0.002	0.0366	0.0022	0.00561	0.00023	0.50996	0	36	1.5	36.5	2.2	71	85	36	1.5	UC Santa Cruz
15JLS027A_62	43	53																	UC Santa Cruz
15JLS027A_63	47800	58	0.0484	0.0025	0.0375	0.0027	0.00556	0.00025	0.60115	-0.13	35.7	1.6	37.4	2.7	136	110	35.7	1.6	UC Santa Cruz	zoned:TRIM
15JLS027A_64	3540	157	0.654	0.038	2.2	0.14	0.0256	0.0015	-0.13394	-123.44	39.6	8.1	1181	43	4623	97	39.6	8.1	UC Santa Cruz	fair; high 207 corr
15JLS027A_65	4540	-32	0.0552	0.0064	0.0415	0.0049	0.00584	0.0003	-0.0090227	-0.46	37.1	1.9	41.4	4.7	290	210	37.1	1.9	UC Santa Cruz
15JLS027A_67	3680	91	0.325	0.021	0.424	0.03	0.00931	0.00053	0.2832	-20.87	38.8	2.7	356	21	3586	100	38.8	2.7	UC Santa Cruz	high 207 corr
15JLS027A_68	-5	-9																	UC Santa Cruz
15JLS027A_69	8680	199	0.1827	0.0096	0.1726	0.011	0.00683	0.00031	0.50334	-7.53	36.4	1.7	160.9	9.7	2664	110	36.4	1.7	UC Santa Cruz	high 207 corr
Humboldt Formation composite western section sample 15JLS029:
15JLS029_1	6710	10	0.0483	0.0056	0.0424	0.0053	0.00635	0.00029	0.11552	-0.07	40.7	1.9	41.8	5.1	60	200	40.7	1.9	UC Santa Cruz
15JLS029_2	55700	55	0.0626	0.0026	0.162	0.0097	0.01914	0.00079	0.55587	-2.14	120.1	4.9	152.6	8.6	675	91	120.1	4.9	UC Santa Cruz
15JLS029_3	6460	13	0.0479	0.005	0.0439	0.0049	0.0065	0.0003	0.11509	-0.09	41.7	1.9	43.4	4.8	120	180	41.7	1.9	UC Santa Cruz
15JLS029_4	3680	36	0.0539	0.0072	0.0415	0.0054	0.0057	0.00026	-0.01405	-0.39	36.3	1.7	41	5.3	310	240	36.3	1.7	UC Santa Cruz
15JLS029_6	9820	-28	0.046	0.0036	0.0378	0.0032	0.00599	0.00027	0.19696	0.04	38.5	1.7	37.6	3.1	20	140	38.5	1.7	UC Santa Cruz
15JLS029_7	15640	-19	0.048	0.0027	0.039	0.0028	0.00591	0.00025	0.22362	-0.04	37.9	1.6	39	2.8	138	110	37.9	1.6	UC Santa Cruz
15JLS029_8	5640	9	0.0442	0.0069	0.0382	0.0067	0.00643	0.0003	-0.012223	0.16	41.5	2	37.5	6	-150	190	41.5	2	UC Santa Cruz
15JLS029_9	-1	87																	UC Santa Cruz
15JLS029_10	7430	-6	0.0421	0.0041	0.0329	0.0033	0.00573	0.00027	0.050191	0.25	37	1.8	33	3.3	-120	150	37	1.8	UC Santa Cruz
15JLS029_11	11620	75	0.0462	0.0033	0.0354	0.0029	0.00565	0.00024	0.11644	0.05	36.3	1.5	35.4	2.8	30	130	36.3	1.5	UC Santa Cruz
15JLS029_12	6980	38	0.0465	0.0048	0.036	0.0037	0.00565	0.00028	0.1308	0.03	36.3	1.8	35.8	3.6	70	170	36.3	1.8	UC Santa Cruz
15JLS029_13	21260	51	0.0498	0.0028	0.1723	0.012	0.02516	0.001	0.3463	-0.02	160.1	6.3	160.7	10	187	110	160.1	6.3	UC Santa Cruz
15JLS029_14	6080	18	0.0462	0.0047	0.0379	0.0041	0.00601	0.00027	0.14891	0.06	38.7	1.7	37.6	4	70	170	38.7	1.7	UC Santa Cruz
15JLS029_15	17	43																	UC Santa Cruz
15JLS029_16	8600	-26	0.0493	0.004	0.0401	0.0036	0.00573	0.00026	0.15528	-0.09	36.7	1.7	39.8	3.5	150	150	36.7	1.7	UC Santa Cruz
15JLS029_17	46	-5																	UC Santa Cruz
15JLS029_18	4850	0	0.052	0.0052	0.04	0.0042	0.00563	0.00028	0.056622	-0.25	36	1.8	39.6	4.1	280	190	36	1.8	UC Santa Cruz
15JLS029_19	56	-9																	UC Santa Cruz
15JLS029_20	9790	0	0.0491	0.0038	0.0405	0.0037	0.00592	0.00025	0.23821	-0.09	37.9	1.6	40.5	3.6	140	150	37.9	1.6	UC Santa Cruz
15JLS029_21	8610	24	0.0464	0.004	0.0362	0.0034	0.0058	0.00025	0.095575	0	37.3	1.6	36	3.3	60	150	37.3	1.6	UC Santa Cruz
15JLS029_22	5770	30	0.0459	0.0045	0.0363	0.0039	0.00581	0.00029	0.2445	0.09	37.4	1.9	36	3.8	60	160	37.4	1.9	UC Santa Cruz
15JLS029_23	3830	6	0.0509	0.0066	0.038	0.0049	0.00565	0.00026	0.05493	-0.17	36.1	1.7	37.6	4.7	100	210	36.1	1.7	UC Santa Cruz
15JLS029_24	58200	30	0.05	0.0022	0.1595	0.01	0.02314	0.00091	0.55377	-0.11	147.3	5.8	150.7	8.6	193	96	147.3	5.8	UC Santa Cruz	zoned:TRIM
15JLS029_25	5630	-2	0.0438	0.0043	0.0254	0.0027	0.00424	0.0002	0.19954	0.12	27.4	1.3	25.6	2.6	-40	160	27.4	1.3	UC Santa Cruz
15JLS029_26	5090	58	0.0517	0.0062	0.0386	0.0043	0.00567	0.00027	0.068647	-0.18	36.2	1.7	38.3	4.2	120	190	36.2	1.7	UC Santa Cruz
15JLS029_27	5170	9	0.0568	0.0065	0.0461	0.0052	0.00606	0.00029	0.33349	-0.44	38.5	1.9	45.5	5	320	190	38.5	1.9	UC Santa Cruz
15JLS029_28	4660	-21	0.0549	0.0065	0.0429	0.0051	0.00572	0.00027	-0.10587	-0.31	36.4	1.7	42.3	4.9	220	190	36.4	1.7	UC Santa Cruz
15JLS029_29	13720	8	0.0459	0.0029	0.0402	0.0029	0.00637	0.00028	0.16048	0.08	41	1.8	40.1	2.8	32	110	41	1.8	UC Santa Cruz
15JLS029_30	13100	36	0.047	0.003	0.0391	0.0029	0.00605	0.00027	0.13292	-0.03	38.9	1.7	38.9	2.9	70	120	38.9	1.7	UC Santa Cruz
15JLS029_31	13560	20	0.0493	0.0031	0.0369	0.0027	0.0056	0.00024	0.13613	-0.12	35.9	1.5	36.8	2.7	170	120	35.9	1.5	UC Santa Cruz
15JLS029_32	8340	15	0.0486	0.0044	0.0384	0.0035	0.00574	0.00027	0.061196	-0.09	36.8	1.7	38.2	3.4	130	160	36.8	1.7	UC Santa Cruz
15JLS029_33	5760	30	0.0429	0.0044	0.0363	0.004	0.00605	0.00029	0.070451	0.17	39.1	1.9	36	3.9	-60	170	39.1	1.9	UC Santa Cruz
15JLS029_34	8600	24	0.0531	0.0043	0.0433	0.0041	0.00591	0.00027	0.22875	-0.32	37.7	1.7	42.9	3.9	280	150	37.7	1.7	UC Santa Cruz
15JLS029_35	8710	73	0.0454	0.0042	0.0357	0.0036	0.00568	0.00026	-0.032976	0.07	36.6	1.7	35.5	3.5	-10	160	36.6	1.7	UC Santa Cruz
15JLS029_36	69600	0	0.0914	0.0035	3.13	0.18	0.2498	0.01	0.51873	0	1436	52	1440	44	1442	73	1442	73	UC Santa Cruz
15JLS029_37	3470	-8	0.0531	0.0058	0.203	0.025	0.0282	0.0016	0.29065	-0.39	178.5	10.1	184	21	330	200	178.5	10.1	UC Santa Cruz
15JLS029_38	5930	-11	0.0509	0.0053	0.0386	0.0043	0.00567	0.00029	0.33027	-0.14	36.3	1.9	38.7	4.1	180	180	36.3	1.9	UC Santa Cruz
15JLS029_39	6930	12	0.0436	0.0048	0.0346	0.0039	0.00585	0.00028	0.085987	0.15	37.8	1.8	34.4	3.8	-80	170	37.8	1.8	UC Santa Cruz
15JLS029_40	8400	38	0.0472	0.004	0.0369	0.0034	0.0058	0.00025	0.14275	0	37.3	1.6	37	3.4	100	140	37.3	1.6	UC Santa Cruz
15JLS029_41	7240	13	0.0576	0.0045	0.0486	0.0045	0.00632	0.00027	0.26097	-0.54	40.1	1.7	48	4.3	480	160	40.1	1.7	UC Santa Cruz
15JLS029_42	7700	11	0.0478	0.0041	0.0406	0.0037	0.00619	0.00029	0.076083	-0.07	39.7	1.9	40.3	3.6	100	150	39.7	1.9	UC Santa Cruz
15JLS029_43	8230	22	0.0485	0.0041	0.0381	0.0036	0.00569	0.00025	0.056253	-0.1	36.5	1.6	38.2	3.5	150	160	36.5	1.6	UC Santa Cruz
15JLS029_44	3680	68	0.048	0.0054	0.0364	0.0044	0.00549	0.00027	0.024651	-0.06	35.2	1.7	36.1	4.3	150	190	35.2	1.7	UC Santa Cruz
15JLS029_45	3530	-20	0.0569	0.0082	0.0425	0.0061	0.00554	0.00029	-0.095312	-0.44	35.2	1.9	41.8	5.9	200	230	35.2	1.9	UC Santa Cruz
15JLS029_46	6670	25	0.052	0.0046	0.0269	0.0026	0.00374	0.00017	0.051653	-0.18	23.9	1.1	26.9	2.6	270	170	23.9	1.1	UC Santa Cruz
15JLS029_47	11960	-9	0.0457	0.0044	0.0363	0.0037	0.00598	0.00028	0.31223	0.09	38.5	1.8	36.1	3.6	40	180	38.5	1.8	UC Santa Cruz	zoned:TRIM
15JLS029_48	11270	8	0.0501	0.0035	0.0405	0.0031	0.00592	0.00026	0.1643	-0.13	37.9	1.7	40.5	3	240	130	37.9	1.7	UC Santa Cruz
15JLS029_50	52500	8	0.0485	0.0023	0.0406	0.0026	0.00612	0.00023	0.063298	-0.08	39.2	1.5	40.4	2.5	125	92	39.2	1.5	UC Santa Cruz
15JLS029_51	14860	11	0.053	0.0036	0.0476	0.0037	0.00655	0.00027	0.18341	-0.3	41.8	1.7	47.1	3.6	300	130	41.8	1.7	UC Santa Cruz
15JLS029_52	11040	-26	0.0453	0.0033	0.0347	0.0029	0.00564	0.00024	0.25447	0.05	36.3	1.6	34.5	2.8	10	130	36.3	1.6	UC Santa Cruz
15JLS029_53	2420	-10	0.0593	0.0083	0.0477	0.0066	0.00582	0.00031	0.076167	-0.58	36.8	2	46.8	6.4	590	240	36.8	2	UC Santa Cruz
15JLS029_54	4200	5	0.0451	0.0053	0.0372	0.0047	0.00588	0.0003	0.08278	0.07	37.9	1.9	36.9	4.6	-20	190	37.9	1.9	UC Santa Cruz
15JLS029_55	5600	-17	0.0442	0.0054	0.0218	0.003	0.00361	0.00017	0.099585	0.09	23.3	1.1	22.4	2.9	120	190	23.3	1.1	UC Santa Cruz
15JLS029_56	4290	-13	0.046	0.011	0.0257	0.0059	0.00408	0.00035	0.23373	-0.03	26.3	2.3	25.6	5.8	-60	370	26.3	2.3	UC Santa Cruz	zoned:TRIM
15JLS029_57	3110	6	0.0516	0.0073	0.043	0.0065	0.00608	0.00031	0.14899	-0.26	38.8	2	42.2	6.3	130	240	38.8	2	UC Santa Cruz
15JLS029_58	4870	78	0.0468	0.0047	0.0368	0.004	0.00583	0.00026	0.055934	-0.03	37.5	1.7	36.5	3.9	70	180	37.5	1.7	UC Santa Cruz
15JLS029_59	8740	22	0.0499	0.0043	0.164	0.016	0.0244	0.0011	0.29868	-0.14	155.3	7	155	14	230	160	155.3	7	UC Santa Cruz
15JLS029_60	12810	1	0.0453	0.003	0.0357	0.0029	0.00571	0.00023	0.30482	0.09	36.8	1.5	35.5	2.8	50	120	36.8	1.5	UC Santa Cruz
15JLS029_61	3420	28	0.0495	0.0066	0.0382	0.0052	0.0058	0.00028	0.032815	-0.15	37.2	1.8	37.7	5	140	220	37.2	1.8	UC Santa Cruz
15JLS029_62	5250	14	0.0492	0.0053	0.0384	0.0043	0.00565	0.00026	0.089614	-0.19	36.2	1.7	38.1	4.2	150	190	36.2	1.7	UC Santa Cruz
15JLS029_63	13	51																	UC Santa Cruz
15JLS029_64	7960	33	0.0438	0.0043	0.0325	0.0034	0.00554	0.00025	0.093449	0.15	35.7	1.6	32.7	3.4	-90	160	35.7	1.6	UC Santa Cruz
15JLS029_65	21	28																	UC Santa Cruz
15JLS029_66	11	62																	UC Santa Cruz
15JLS029_67	62	1																	UC Santa Cruz
15JLS029_68	35	-40																	UC Santa Cruz
15JLS029_69	4790	37	0.0553	0.0058	0.0458	0.005	0.00612	0.00029	0.11307	-0.39	38.9	1.9	45.2	4.9	320	200	38.9	1.9	UC Santa Cruz
15JLS029_70	3080	22	0.0499	0.0081	0.0407	0.0066	0.00639	0.00036	-0.040951	-0.2	40.9	2.3	40	6.4	130	270	40.9	2.3	UC Santa Cruz
15JLS029_71	6040	7	0.0399	0.0052	0.0306	0.0042	0.00569	0.00027	0.027376	0.29	36.9	1.8	30.4	4.1	-200	200	36.9	1.8	UC Santa Cruz
15JLS029_72	7310	-4	0.0421	0.0043	0.0341	0.0037	0.00579	0.00027	0.027942	0.24	37.4	1.8	33.9	3.6	-160	160	37.4	1.8	UC Santa Cruz
15JLS029_73	6480	31	0.0452	0.0045	0.0364	0.0038	0.00605	0.0003	0.12444	0.06	39	1.9	36.1	3.7	20	170	39	1.9	UC Santa Cruz
15JLS029_74	5190	2	0.0462	0.0051	0.035	0.0041	0.00577	0.00028	0.052066	0.02	37.1	1.8	34.7	4	20	190	37.1	1.8	UC Santa Cruz
15JLS029_75	4510	41	0.0519	0.0056	0.0398	0.0043	0.00551	0.00028	-0.013572	-0.21	35.2	1.8	39.4	4.2	260	190	35.2	1.8	UC Santa Cruz
15JLS029_76	4570	6	0.0492	0.0058	0.0379	0.0048	0.00594	0.00027	0.15127	-0.14	38.1	1.7	37.5	4.7	130	200	38.1	1.7	UC Santa Cruz
15JLS029_77	13200	29	0.0465	0.0039	0.0375	0.0034	0.00598	0.00024	0.063085	0	38.4	1.6	37.3	3.3	40	150	38.4	1.6	UC Santa Cruz
15JLS029_78	8120	4	0.0451	0.0044	0.0379	0.0039	0.00623	0.00027	-0.051455	0.12	40.1	1.7	37.6	3.8	-50	160	40.1	1.7	UC Santa Cruz
15JLS029_79	6690	-6	0.047	0.0039	0.0367	0.0036	0.00583	0.00027	0.40251	-0.04	37.5	1.7	36.8	3.5	70	150	37.5	1.7	UC Santa Cruz
15JLS029_80	3610	-19	0.0527	0.0068	0.0391	0.0049	0.0056	0.00028	-0.1501	-0.27	35.7	1.8	39.5	4.7	200	220	35.7	1.8	UC Santa Cruz
15JLS029_81	5130	21	0.0437	0.0055	0.0345	0.0044	0.00572	0.0003	0.080411	0.11	36.9	1.9	34.2	4.3	-20	200	36.9	1.9	UC Santa Cruz
15JLS029_82	21	28																	UC Santa Cruz
15JLS029_83	149700	24	0.0479	0.0018	0.039	0.0022	0.006	0.00023	0.46251	-0.05	38.5	1.5	38.83	2.1	98	79	38.5	1.5	UC Santa Cruz
15JLS029_84	7210	10	0.0504	0.0042	0.0396	0.0037	0.00583	0.00025	0.17047	-0.16	37.3	1.6	39.3	3.6	200	150	37.3	1.6	UC Santa Cruz
15JLS029_85	4460	5	0.0429	0.0057	0.0364	0.0051	0.00611	0.0003	0.10526	0.16	39.5	2	36	4.9	-30	220	39.5	2	UC Santa Cruz
15JLS029_86	-3	2																	UC Santa Cruz
15JLS029_87	4660	22	0.0549	0.0062	0.0447	0.0049	0.00605	0.0003	0.0012633	-0.41	38.5	1.9	44.2	4.8	260	200	38.5	1.9	UC Santa Cruz
15JLS029_88	-35	78																	UC Santa Cruz
15JLS029_89	4440	29	0.0519	0.0065	0.0367	0.0046	0.00555	0.00028	0.067871	-0.25	35.4	1.8	36.3	4.5	140	210	35.4	1.8	UC Santa Cruz
15JLS029_90	7880	-13	0.0443	0.0042	0.0398	0.0039	0.00642	0.00028	-0.083358	0.09	41.4	1.8	39.8	3.8	80	170	41.4	1.8	UC Santa Cruz
15JLS029_91	9810	12	0.0446	0.0037	0.0353	0.0033	0.00592	0.00025	0.18387	0.13	38.2	1.6	35.1	3.2	-10	140	38.2	1.6	UC Santa Cruz
15JLS029_92	6970	-11	0.0454	0.0042	0.0378	0.0039	0.00618	0.00027	0.21864	0.09	39.8	1.7	37.5	3.8	0	160	39.8	1.7	UC Santa Cruz
15JLS029_93	11590	36	0.0487	0.004	0.0369	0.0033	0.00566	0.00025	0.12975	-0.07	36.3	1.6	36.7	3.2	150	150	36.3	1.6	UC Santa Cruz
15JLS029_94	4010	36	0.0478	0.0057	0.0406	0.0051	0.00606	0.00032	0.14835	0	38.9	2.1	40.1	5	170	200	38.9	2.1	UC Santa Cruz
15JLS029_95	6680	36	0.0458	0.0041	0.0342	0.003	0.00555	0.00025	0.039074	0.02	35.7	1.6	34	2.9	60	150	35.7	1.6	UC Santa Cruz
15JLS029_96	-4	42																	UC Santa Cruz
15JLS029_97	3330	24	0.0426	0.0097	0.146	0.034	0.0253	0.0022	0.14806	1.4	162.4	14.1	136	29	-60	380	162.4	14.1	UC Santa Cruz	zoned:TRIM
15JLS029_98	7570	29	0.0423	0.0037	0.0349	0.0033	0.00597	0.00028	0.13697	0.19	38.6	1.8	34.8	3.2	-110	140	38.6	1.8	UC Santa Cruz
15JLS029_99	7240	16	0.0449	0.0046	0.0357	0.0037	0.00597	0.00026	-0.049011	0.06	38.5	1.7	35.5	3.7	-20	170	38.5	1.7	UC Santa Cruz
15JLS029_100	5010	-3	0.047	0.0057	0.0381	0.0045	0.00569	0.00027	0.055453	-0.04	36.6	1.8	37.7	4.4	130	200	36.6	1.8	UC Santa Cruz
15JLS029_101	5250	59	0.0459	0.0055	0.0377	0.0043	0.00604	0.0003	0.058109	0.06	38.9	1.9	37.4	4.2	40	190	38.9	1.9	UC Santa Cruz
15JLS029_103	7630	17	0.0499	0.0049	0.0428	0.0048	0.0064	0.00031	0.2221	-0.13	41	2	42.8	4.6	130	170	41	2	UC Santa Cruz
15JLS029_104	11370	33	0.0492	0.0039	0.0396	0.0037	0.00601	0.00027	0.034735	-0.09	38.5	1.7	39.3	3.6	110	140	38.5	1.7	UC Santa Cruz
15JLS029_105	9890	1	0.0452	0.0034	0.0343	0.0029	0.00563	0.00025	0.096981	0.07	36.3	1.6	34.2	2.9	30	130	36.3	1.6	UC Santa Cruz
15JLS029_106	11350	-18	0.0454	0.0036	0.0345	0.0031	0.00575	0.00026	0.25571	0.12	37	1.7	34.9	3.1	40	140	37	1.7	UC Santa Cruz
15JLS029_107	9	24																	UC Santa Cruz
15JLS029_108	4620	22	0.0469	0.0059	0.0165	0.0021	0.00279	0.00015	0.10129	0	17.9	1	16.5	2.1	40	210	17.9	1	UC Santa Cruz
15JLS029_109	3860	40	0.0447	0.0056	0.0335	0.0043	0.00575	0.00028	0.03613	0.06	37.1	1.8	33.7	4.1	10	190	37.1	1.8	UC Santa Cruz
15JLS029_110	6410	37	0.0499	0.0046	0.0388	0.004	0.00575	0.00026	0.32097	-0.19	36.8	1.7	38.5	3.9	160	170	36.8	1.7	UC Santa Cruz
15JLS029_111	18110	0	0.0474	0.0028	0.035	0.0025	0.00549	0.00022	0.18654	-0.04	35.3	1.4	34.9	2.5	105	110	35.3	1.4	UC Santa Cruz
15JLS029_112	6730	22	0.0457	0.0046	0.0344	0.0036	0.00578	0.00026	0.20824	0.1	37.2	1.7	34.2	3.5	0	170	37.2	1.7	UC Santa Cruz	fair
15JLS029_113	33	53																	UC Santa Cruz
15JLS029_114	7490	37	0.0496	0.0055	0.0372	0.0042	0.00563	0.00026	-0.063554	-0.14	36.1	1.7	36.9	4.1	80	180	36.1	1.7	UC Santa Cruz
15JLS029_115	18360	30	0.0486	0.0028	0.0366	0.0025	0.00567	0.00023	0.12289	-0.08	36.4	1.5	36.5	2.4	141	110	36.4	1.5	UC Santa Cruz
15JLS029_116	12970	32	0.0768	0.0044	1.639	0.12	0.1602	0.0069	0.4323	0	959	38	980	46	1097	120	959	38	UC Santa Cruz
15JLS029_117	2510	-2	0.05	0.01	0.0185	0.0038	0.00302	0.00019	-0.021916	-0.05	19.4	1.2	18.4	3.8	50	310	19.4	1.2	UC Santa Cruz
15JLS029_118	66	17																	UC Santa Cruz
15JLS029_119	2526	96	0.588	0.038	1.453	0.1	0.01866	0.00099	0.17334	-80.66	38.4	6.1	913	41	4454	100	38.4	6.1	UC Santa Cruz	high 207 corr
15JLS029_120	8850	20	0.0465	0.0039	0.035	0.0034	0.00558	0.00024	0.28378	0.01	35.9	1.6	34.8	3.3	50	150	35.9	1.6	UC Santa Cruz
15JLS029-1	129363	27.943	0.0704333	0.0111917	0.0414512	89.4065	0.00426833	3.11842	0.0348791		27.4569	0.854399	41.2399	36.1477	941.029	271.116	27.4569	0.854399	Arizona LaserChron
15JLS029-2	116577	43.7736	0.0806052	0.0245794	0.0668311	40.8394	0.00601332	3.55481	0.0870436		38.6483	1.36976	65.6879	25.9829	1211.85	836.274	38.6483	1.36976	Arizona LaserChron
15JLS029-3	109382	7.7875	0.0878206	0.00477512	0.0708747	209.459	0.0058532	4.08221	0.0194893		37.6222	1.53134	69.5291	141.673	1378.54	666.283	37.6222	1.53134	Arizona LaserChron
15JLS029-4	155354	2.02468	0.0495131	0.0192574	0.0419924	51.9971	0.00615105	2.67505	0.0514462		39.5308	1.05423	41.7674	21.2803	172.176	1295.15	39.5308	1.05423	Arizona LaserChron
15JLS029-5	52828.7	8.15621	-12.0159	0.00011943	-9.75628	8373.1	0.00588882	12.7764	0.00152589		37.8504	4.82177					37.8504	4.82177	Arizona LaserChron
15JLS029-6	99488.6	14.1875	0.135459	0.00432384	0.110061	231.334	0.00589282	5.15438	0.0222812		37.8761	1.94655	106.021	237.11	2169.92	147.212	37.8761	1.94655	Arizona LaserChron
15JLS029-7	68894.1	40.9459	0.112312	0.0105774	0.0942466	95.0507	0.0060861	9.82876	0.103405		39.1146	3.83284	91.4516	83.3123	1837.14		39.1146	3.83284	Arizona LaserChron
15JLS029-8	184250	5.83772	0.0427519	0.0327268	0.0345322	30.593	0.00585824	1.50438	0.049174		37.6545	0.564814	34.4715	10.3692	-182.017	778.295	37.6545	0.564814	Arizona LaserChron
15JLS029-9	117551	11.4582	0.143534	0.00175602	0.116154	569.482	0.00586917	3.66566	0.00643683		37.7245	1.37881	111.579	692.211	2270.27	1170.71	37.7245	1.37881	Arizona LaserChron
15JLS029-10	110765	11.9453	0.229932	0.00375708	0.188378	266.234	0.00594194	6.08415	0.0228527		38.1909	2.31672	175.244	457.078	3051.56	350.656	38.1909	2.31672	Arizona LaserChron
15JLS029-11	142380	1.26958	0.0249017	0.0127231	0.0202988	78.6841	0.00591206	3.69935	0.0470152		37.9994	1.4016	20.4046	15.8962			37.9994	1.4016	Arizona LaserChron
15JLS029-12	648212	25.7825	0.0484115	0.0902716	0.0959011	11.1297	0.0143673	1.07505	0.0965927		91.9583	0.981579	92.9857	9.88964	119.449	261.76	91.9583	0.981579	Arizona LaserChron
15JLS029-13	409775	28.1779	0.0420581	0.0357305	0.0341814	28.018	0.00589439	1.31252	0.0468455		37.8861	0.495804	34.1272	9.40313	-223.033	716.195	37.8861	0.495804	Arizona LaserChron
15JLS029-14	207325	24.3264	0.0668545	0.0330765	0.053442	30.3987	0.00579763	3.17026	0.104289		37.266	1.17802	52.8637	15.66	833.23	644.217	37.266	1.17802	Arizona LaserChron
15JLS029-15	181155	10.3642	0.0436169	0.0131782	0.0367307	75.9063	0.00610765	1.89597	0.0249778		39.2527	0.741958	36.6271	27.3134	-132.249	2224.1	39.2527	0.741958	Arizona LaserChron
15JLS029-16	166618	46.7598	0.0816254	0.00976561	0.0671043	102.461	0.00596244	3.53922	0.034542		38.3222	1.35229	65.9478	65.5142	1236.56	164.923	38.3222	1.35229	Arizona LaserChron
15JLS029-17	103398	14.0062	0.15153	0.00684057	0.134245	146.257	0.00642536	4.52368	0.0309297		41.288	1.86177	127.905	177.554	2363.25	329.261	41.288	1.86177	Arizona LaserChron
15JLS029-18	75192.6	20.4098	0.286208	0.00272746	0.231759	366.693	0.0058729	6.13627	0.0167341		37.7484	2.30958	211.649	860.889	3397.12	325.473	37.7484	2.30958	Arizona LaserChron
15JLS029-19	215566	149.874	0.0235656	0.0106869	0.0189253	93.5897	0.00582457	1.81066	0.0193468		37.4387	0.675924	19.0369	17.6523			37.4387	0.675924	Arizona LaserChron
15JLS029-20	198776	6.06464	0.0447672	0.0136286	0.0372552	73.4281	0.00603566	2.79162	0.0380184		38.7914	1.07966	37.1406	26.7851	-68.2807	2092.67	38.7914	1.07966	Arizona LaserChron
15JLS029-21	89238.5	25.366	0.305243	0.00192674	0.260859	519.142	0.0061981	11.6492	0.0224393		39.8322	4.62582	235.359		3497.03	81.3223	39.8322	4.62582	Arizona LaserChron
15JLS029-22	155258	13.6079	0.0549038	0.0206133	0.0460305	48.6056	0.00608053	3.00906	0.0619076		39.079	1.17235	45.6948	21.7212	408.286	1150.71	39.079	1.17235	Arizona LaserChron
15JLS029-23	3.17573e+06	16.2384	0.100773	0.479245	2.56024	5.07055	0.184262	4.62131	0.911402		1090.21	46.353	1289.36	37.0407	1638.38	38.7459	1638.38	38.7459	Arizona LaserChron	discordance
15JLS029-24	104860	20.4361	0.0711508	0.0201599	0.059796	49.7677	0.00609524	4.04141	0.0812055		39.1732	1.57835	58.9698	28.5195	961.768	1082.17	39.1732	1.57835	Arizona LaserChron
15JLS029-25	88885.5	4.86388	0.0372346	0.013486	0.0303556	74.6732	0.00591277	8.81377	0.118031		38.0039	3.33972	30.364	22.3417	-539.519	2314.58	38.0039	3.33972	Arizona LaserChron
15JLS029-26	92672.6	40.0218	0.118526	0.00459241	0.0629011	217.806	0.00384895	4.92373	0.022606		24.7643	1.21699	61.9404	131.61	1934.11	267.344	24.7643	1.21699	Arizona LaserChron
15JLS029-27	96987	204.019	0.086458	0.00906114	0.075049	110.496	0.00629562	5.4579	0.0493945		40.4569	2.20119	73.4795	78.4798	1348.43	140.693	40.4569	2.20119	Arizona LaserChron
15JLS029-28	151963	0.978402	0.0696393	0.0116157	0.0573774	86.2566	0.00597565	5.34666	0.0619856		38.4069	2.04738	56.65	47.561	917.756	2384.6	38.4069	2.04738	Arizona LaserChron
15JLS029-29	170249	9.8083	0.0359545	0.00682862	0.0310067	146.479	0.00625462	3.28977	0.0224589		40.1943	1.31819	31.0054	44.7591	-634.36	0	40.1943	1.31819	Arizona LaserChron
15JLS029-30	64451.3	3.01262	0.2197	0.00687116	0.179211	145.813	0.00591608	8.99117	0.0616622		38.0251	3.40884	167.381	228.805	2978.48	707.193	38.0251	3.40884	Arizona LaserChron
15JLS029-31	413652	14.9795	0.0803172	0.00628072	0.107191	159.221	0.00967944	1.10448	0.00693676		62.0976	0.682562	103.393	157.777	1204.77	530.384	62.0976	0.682562	Arizona LaserChron
15JLS029-32	50727.9	23.0145	0.365401	0.00431865	0.298105	231.916	0.00591696	12.9645	0.0559015		38.0308	4.91597	264.919	602.884	3772.45	901.416	38.0308	4.91597	Arizona LaserChron
15JLS029-33	74418.9	134.264	-0.584883	0.00149169	-0.469972	670.432	0.00582776	8.41803	0.0125561		37.4591	3.14418	-644.591				37.4591	3.14418	Arizona LaserChron
15JLS029-34	82421	159.805	0.457928	0.00260918	0.429181	383.319	0.0067974	6.55875	0.0171104		43.6706	2.85456	362.595		4111.17	761.619	43.6706	2.85456	Arizona LaserChron
15JLS029-35	172186	9.83731	0.0444059	0.00979126	0.0364566	102.311	0.00595436	6.05382	0.0591707		38.2704	2.30996	36.3586	36.5566	-88.1127	1121.63	38.2704	2.30996	Arizona LaserChron
15JLS029-1 REMOUNT	122662	32.9568	0.0417295	0.0406468	0.0343531	25.9678	0.00597066	8.31026	0.320022		38.3749	3.17958	34.2958	8.75736	-242.815	629.567	38.3749	3.17958	Arizona LaserChron
15JLS029-2 REMOUNT	96018.6	412.876	0.115883	0.0580252	0.0406261	25.897	0.00254263	19.33	0.746418		16.37	3.16031	40.4351	10.2661	1893.64	312.435	16.37	3.16031	Arizona LaserChron
15JLS029-3 REMOUNT	130891	12.9193	0.0486069	0.0738159	0.043069	15.4022	0.00642636	7.32815	0.475785		41.2944	3.01645	42.8159	6.4576	128.935	319.976	41.2944	3.01645	Arizona LaserChron
15JLS029-4 REMOUNT	60078.3	15.0867	0.0526048	0.0312862	0.0442735	32.9054	0.00610404	7.81903	0.237621		39.2295	3.05806	43.9878	14.1663	311.795	744.593	39.2295	3.05806	Arizona LaserChron
15JLS029-5 REMOUNT	83944.8	7.09557	0.0528061	0.0247334	0.0433576	41.127	0.00595498	7.53303	0.183165		38.2744	2.87468	43.0969	17.3553	320.497	954.853	38.2744	2.87468	Arizona LaserChron
15JLS029-6 REMOUNT	185709	3.46197	0.0447995	0.0693252	0.0358302	14.6612	0.00580062	2.62253	0.178875		37.2852	0.974992	35.7448	5.14949	-66.5224	353.689	37.2852	0.974992	Arizona LaserChron
15JLS029-7 REMOUNT	75621.9	9.22166	0.123116	0.00335256	0.099852	298.358	0.00588222	6.86264	0.0230013		37.8081	2.58704	96.6397	282.076	2001.85	533.909	37.8081	2.58704	Arizona LaserChron
15JLS029-8 REMOUNT	214618	23.1455	0.0459673	0.106423	0.0387641	9.79882	0.00611617	2.77909	0.283615		39.3073	1.08906	38.6167	3.71295	-4.07282	227.092	39.3073	1.08906	Arizona LaserChron
15JLS029-9 REMOUNT	162300	6.56299	0.0439269	0.0778463	0.036841	13.4307	0.00608275	3.92022	0.291886		39.0931	1.5279	36.7351	4.84564	-114.766	317.629	39.0931	1.5279	Arizona LaserChron
15JLS029-10 REMOUNT	259118	22.1927	0.0482645	0.158372	0.168116	6.60401	0.0252627	1.93469	0.292957		160.831	3.07308	157.782	9.65102	112.266	149.149	160.831	3.07308	Arizona LaserChron
Humboldt Formation eastern base section sample 15JLS036B:
15JLS036B_1	14	53																	UC Santa Cruz
15JLS036B_2	37100	10	0.0507	0.0028	0.01232	0.00079	0.001794	6.8e-05	0.051006	-0.06	11.5	0.4	12.43	0.79	195	100	11.5	0.4	UC Santa Cruz
15JLS036B_4	-35	89																	UC Santa Cruz
15JLS036B_5	5310	83	0.0523	0.0065	0.039	0.0051	0.00541	0.00025	0.14032	-0.26	34.5	1.6	38.6	4.9	180	210	34.5	1.6	UC Santa Cruz
15JLS036B_6	140	20																	UC Santa Cruz
15JLS036B_7	34370	15	0.0468	0.0023	0.0271	0.0018	0.00429	0.00017	0.29029	-0.01	27.6	1.1	27.2	1.7	55	94	27.6	1.1	UC Santa Cruz
15JLS036B_8	6210	198	0.582	0.029	1.779	0.1	0.02241	0.0011	0.0634	-95.38	47.4	5.7	1034	37	4474	74	47.4	5.7	UC Santa Cruz	high 207 corr
15JLS036B_9	126	36																	UC Santa Cruz
15JLS036B_16	70000	130																	UC Santa Cruz
15JLS036B_17	440	66																	UC Santa Cruz
15JLS036B_18	210	107																	UC Santa Cruz
15JLS036B_20	26000	125																	UC Santa Cruz
15JLS036B_22	189	63																	UC Santa Cruz
15JLS036B_24	1380	103																	UC Santa Cruz
15JLS036B_19A	67	88																	UC Santa Cruz
15JLS036B_20A	155	83																	UC Santa Cruz
15JLS036B_21A	2400	149																	UC Santa Cruz
15JLS036B_22A	166	64																	UC Santa Cruz
15JLS036B_24A	183	71																	UC Santa Cruz	204 spk:TRIM
15JLS036B_26	350	53																	UC Santa Cruz
15JLS036B_27	45	17																	UC Santa Cruz
15JLS036B_28	2300	0																	UC Santa Cruz
15JLS036B_30	360	138																	UC Santa Cruz
15JLS036B_31	70000	91																	UC Santa Cruz	204 spk:TRIM
15JLS036B_32	360	39																	UC Santa Cruz
15JLS036B_35	700	31																	UC Santa Cruz
15JLS036B_37	86	5																	UC Santa Cruz
15JLS036B_38	13000	88																	UC Santa Cruz
15JLS036B_39	590	76																	UC Santa Cruz
15JLS036B_41	514	71																	UC Santa Cruz
15JLS036B_42	3830	16	0.0455	0.0054	0.0348	0.0044	0.00546	0.00028	0.08557	0.06	35.2	1.8	34.5	4.3	-60	190	35.2	1.8	UC Santa Cruz
15JLS036B_45	418	63																	UC Santa Cruz
15JLS036B_46	3700	60																	UC Santa Cruz
15JLS036B_47	-3	70																	UC Santa Cruz	204 spk:TRIM
15JLS036B_48	93	96																	UC Santa Cruz
15JLS036B_50	800	74																	UC Santa Cruz
15JLS036B_52	1500	62																	UC Santa Cruz
15JLS036B_54	490	22																	UC Santa Cruz	204 spk:TRIM
15JLS036B_55	1800	102																	UC Santa Cruz
15JLS036B_56	320	84																	UC Santa Cruz
15JLS036B_57	-17	7																	UC Santa Cruz
15JLS036B_58	1770	103																	UC Santa Cruz
15JLS036B_59	102	39																	UC Santa Cruz
15JLS036B_60	154	101																	UC Santa Cruz
15JLS036B_62	181	42																	UC Santa Cruz
15JLS036B_63	13	62																	UC Santa Cruz
15JLS036B_64	2900	65																	UC Santa Cruz
15JLS036B_65	1230	125																	UC Santa Cruz
15JLS036B_66	7600	150																	UC Santa Cruz
15JLS036B_67	714	43	0.89	0.16	3.43	0.33	0.0411	0.0045	-0.11234	-270.27	-12.3	52.6	1483	79	4920	430	-12.3	52.6	UC Santa Cruz	fair; low U; high 207 corr
15JLS036B_68	76	-17																	UC Santa Cruz
15JLS036B_70	483	76																	UC Santa Cruz
15JLS036B_71	136	25																	UC Santa Cruz
15JLS036B_72	7	-43																	UC Santa Cruz
15JLS036B_74	79	75																	UC Santa Cruz
15JLS036B_75	520	23																	UC Santa Cruz
15JLS036B_77	400	120																	UC Santa Cruz
15JLS036B_78	1100	77																	UC Santa Cruz
15JLS036B_80	200	29																	UC Santa Cruz	204 spk:TRIM
15JLS036B_81	98	131																	UC Santa Cruz
15JLS036B_82	209	21																	UC Santa Cruz
15JLS036B_83	350	50																	UC Santa Cruz
15JLS036B_84	2300	114																	UC Santa Cruz
15JLS036B_85	736	89																	UC Santa Cruz
15JLS036B_86	159	88																	UC Santa Cruz
15JLS036B_87	24	32																	UC Santa Cruz
15JLS036B_88	118	56																	UC Santa Cruz	204 spk:TRIM
15JLS036B_89	53	22																	UC Santa Cruz
15JLS036B_91	85	89																	UC Santa Cruz
15JLS036B_93	3600	29																	UC Santa Cruz	204 spk:TRIM
15JLS036B_94	144	91																	UC Santa Cruz
15JLS036B_95	1815	32	0.238	0.023	0.456	0.042	0.01415	0.00087	0.078951	-21.55	69	5	372	30	3000	170	69	5	UC Santa Cruz	high 207 corr
15JLS036B_96	284	-15																	UC Santa Cruz
15JLS036B_98	1	51																	UC Santa Cruz
15JLS036B_100	146	-32																	UC Santa Cruz
15JLS036B-1	88482.9	58.5282	-2.14589	0.000548935	-1.75418	1821.73	0.00592877	9.74922	0.00535161		38.1065	3.70412					38.1065	7.40825	Arizona LaserChron
15JLS036B-2	167531	16.7296	-0.596938	0.00102409	-0.543264	976.483	0.00660055	4.00461	0.00410106		42.4101	1.69278	-795.704				42.4101	3.38557	Arizona LaserChron
15JLS036B-3	1.59372e+07	165.268	0.173532	0.605775	9.57225	2.51686	0.400067	1.89988	0.754859		2169.35	34.9971	2394.51	23.1426	2591.99	27.5404	2591.99	55.0808	Arizona LaserChron
15JLS036B-4	1.07812e+06	219.488	0.0488384	0.0931078	0.0395576	10.9323	0.00587444	2.04023	0.186624		37.7583	0.768103	39.392	4.22401	140.09	252.778	37.7583	1.53621	Arizona LaserChron
15JLS036B-5	306589	5.6127	0.0387098	0.0133813	0.0297743	74.7421	0.00557852	1.26448	0.0169179		35.8615	0.452201	29.791	21.9463	-436.33	2295.93	35.8615	0.904403	Arizona LaserChron
15JLS036B-6	199621	6.29711	0.0581486	0.0106017	0.0473876	94.3586	0.0059105	2.53247	0.0268388		37.9894	0.95924	47.0113	43.3743	535.379	583.368	37.9894	1.91848	Arizona LaserChron
15JLS036B-7	112801	11.5485	-0.680225	0.00123873	-0.582588	807.301	0.00621165	6.1602	0.00763061		39.919	2.45149	-887.12				39.919	4.90299	Arizona LaserChron
15JLS036B-8	128400	188.117	0.123539	0.00763347	0.0723717	131.079	0.00424878	4.49082	0.0342604		27.3314	1.2248	70.9476	90.0583	2007.94	174.609	27.3314	2.44961	Arizona LaserChron
15JLS036B-9	33134.9	81.2398	1.54938	0.00125498	1.1697	796.933	0.00547537	12.9907	0.0163008		35.2002	4.56028	786.503				35.2002	9.12055	Arizona LaserChron
15JLS036B-10	108394	18.0403	0.322643	0.00313115	0.276142	319.441	0.00620739	6.62881	0.0207513		39.8917	2.63618	247.593	863.392	3582.47	559.761	39.8917	5.27236	Arizona LaserChron
15JLS036B-11	98712.8	25.3201	0.776017	0.00180463	0.624254	554.136	0.0058343	2.68283	0.00484145		37.501	1.00317	492.51				37.501	2.00633	Arizona LaserChron
15JLS036B-12	104925	17.3248	0.058939	0.00691796	0.053161	145.056	0.00654168	12.0938	0.0833732		42.033	5.06686	52.5929	74.4806	564.824	945.203	42.033	10.1337	Arizona LaserChron
15JLS036B-13	8334.64	2.21392	4.03335	0.00376745	1.06653	271.845	0.00191781	58.7024	0.215941		12.3511	7.24348	737.035				12.3511	14.487	Arizona LaserChron	extremely high error
15JLS036B-14	19904.6	28.7168	-2.43299	0.00165429	-0.640922	610.589	0.00191057	86.0898	0.140995		12.3046	10.5829	-1039.97				12.3046	21.1658	Arizona LaserChron	extremely high error
15JLS036B-15	168101	204.176	0.112883	0.0124473	0.0939815	80.4241	0.00603829	3.71132	0.0461468		38.8082	1.43597	91.2056	70.2654	1846.32	347.24	38.8082	2.87194	Arizona LaserChron
Humboldt Formation middle–upper section sample 15JLS037:
15JLS037_2	41800	-9	0.0878	0.0034	2.876	0.16	0.2346	0.0095	0.49958	0	1357	50	1374	43	1385	74	1385	74	UC Santa Cruz	reverse discordance; low 206/204
15JLS037_3	3300	19	0.153	0.012	0.243	0.02	0.01165	0.00059	0.1488	-9.93	64.8	3.5	218	17	2280	140	64.8	3.5	UC Santa Cruz	high 207 corr
15JLS037_4	10520	67	0.0959	0.0071	0.273	0.023	0.02046	0.00088	0.31856	-8.24	122.9	5.4	243	18	1490	150	122.9	5.4	UC Santa Cruz	zoned:TRIM
15JLS037_5	1029	42	0.445	0.045	1.406	0.12	0.0256	0.0021	0.15274	-79.62	82.4	11.4	888	51	3930	170	82.4	11.4	UC Santa Cruz	fair; high 207 corr
15JLS037_6	5440	40	0.129	0.017	0.168	0.028	0.00791	0.00043	0.62967	-5.25	45.5	2.7	148	21	1780	210	45.5	2.7	UC Santa Cruz	fair; high 207 corr
15JLS037_7	7040	36	0.1051	0.008	0.18	0.015	0.01259	0.00054	0.11406	-5.77	74.8	3.3	167	13	1550	140	74.8	3.3	UC Santa Cruz
15JLS037_8	8920	66	0.1048	0.0063	0.274	0.019	0.01929	0.00082	0.19609	-8.6	114.5	4.9	247	15	1657	110	114.5	4.9	UC Santa Cruz
15JLS037_9	470	24	0.18	0.15	0.063	0.027	0.00547	0.00058	-0.022214	-5.95	29.3	7.3	54	24	-1100	1100	29.3	7.3	UC Santa Cruz	fair; high 207 corr
15JLS037_10	10720	7	0.0806	0.0053	0.1093	0.0077	0.01013	0.00043	0.040724	-2.65	62.3	2.7	105	7	1160	130	62.3	2.7	UC Santa Cruz
15JLS037_11	2950	3	0.24	0.026	0.671	0.068	0.0205	0.0018	0.14447	-31.49	99.5	9.7	526	38	3090	190	99.5	9.7	UC Santa Cruz	zoned:TRIM; high 207 corr
15JLS037_12	49500	36	0.0753	0.0029	1.419	0.081	0.1349	0.0052	0.48495	0	815	29	894	34	1067	80	815	29	UC Santa Cruz
15JLS037_13	83100	18	0.0508	0.0048	0.0923	0.0081	0.01373	0.00081	0.21058	-0.33	87.6	5.2	89.6	7.5	210	200	87.6	5.2	UC Santa Cruz	zoned:TRIM
15JLS037_14	6310	-5	0.1262	0.0085	0.244	0.018	0.01382	0.00063	0.14596	-8.73	79.8	3.7	223	14	2080	120	79.8	3.7	UC Santa Cruz	fair
15JLS037_15	1473	44	0.247	0.026	0.203	0.019	0.00651	0.00043	0.13417	-10.53	31.3	2.5	186	16	3000	150	31.3	2.5	UC Santa Cruz	high 207 corr
15JLS037_16	57470	-16	0.0742	0.003	1.777	0.1	0.1727	0.0067	0.46944	0	1026	37	1037	37	1043	81	1043	81	UC Santa Cruz
15JLS037_17	463	-15	1.08	0.22	6.4	1.2	0.0457	0.0075	0.30465	-368.51	-82.5	82	1940	150	5520	530	-82.5	82	UC Santa Cruz	zoned:TRIM; high 207 corr
15JLS037_18	1304	53	0.239	0.026	0.192	0.019	0.00634	0.00044	0.029423	-9.84	30.9	2.5	177	16	3000	190	30.9	2.5	UC Santa Cruz	high 207 corr
15JLS037_19	136800	8	0.04771	0.0017	0.0737	0.0041	0.0113	0.00044	0.58489	-0.09	72.4	2.8	72.2	3.8	91	75	72.4	2.8	UC Santa Cruz
15JLS037_20	9560	-11	0.0557	0.004	0.0909	0.0072	0.01159	0.00048	0.089458	-0.98	73.5	3.1	88	6.7	430	150	73.5	3.1	UC Santa Cruz
15JLS037_21	1290	-2	2.3	3.1	11	17	0.0251	0.0041	0.079767	-458.03	-299	650.5	1230	110	8400	6900	-299	650.5	UC Santa Cruz	zoned_TRIM; high 207 corr
15JLS037_22	930	16	0.635	0.082	2.2	0.21	0.0288	0.0022	-0.04706	-133.89	49.1	19.3	1136	66	4410	220	49.1	19.3	UC Santa Cruz	high 207 corr
15JLS037_23	2900	57	0.184	0.015	0.391	0.036	0.01509	0.00084	0.23413	-16.43	80.1	4.8	332	26	2650	150	80.1	4.8	UC Santa Cruz	high 207 corr
15JLS037_24	6060	71	0.1462	0.0092	0.489	0.034	0.02411	0.0011	0.011095	-19.01	135	6.4	402	23	2273	110	135	6.4	UC Santa Cruz	high 207 corr
15JLS037_25	20760	47	0.0723	0.0035	1.676	0.11	0.1678	0.0068	0.42711	0	1003	39	998	41	970	100	970	100	UC Santa Cruz
15JLS037_26	8010	20	0.068	0.0053	0.1261	0.01	0.01365	0.0006	0.028467	-2.22	85.2	3.8	120.6	9.2	770	160	85.2	3.8	UC Santa Cruz
15JLS037_27	177000	4	0.0759	0.0027	1.705	0.094	0.1622	0.0061	0.43913	0	969	34	1009	34	1087	69	969	34	UC Santa Cruz
15JLS037_28	9270	95	0.1567	0.0098	0.319	0.023	0.01531	0.00078	0.27322	-13.31	84.6	4.5	280	18	2399	110	84.6	4.5	UC Santa Cruz	zoned:TRIM; high 207 corr
15JLS037_29	14380	49	0.0744	0.0044	0.1232	0.0087	0.01225	0.00051	0.23656	-2.65	75.8	3.2	117.5	7.9	980	120	75.8	3.2	UC Santa Cruz
15JLS037_31	1095	53	0.373	0.037	0.507	0.046	0.01052	0.0008	0.065258	-27.6	39.8	4.4	410	32	3690	160	39.8	4.4	UC Santa Cruz	fair; high 207 corr
15JLS037_32	214000	41	0.1089	0.0037	4.391	0.24	0.296	0.011	0.71225	0	1672	56	1709	44	1781	62	1781	62	UC Santa Cruz	76 fair
15JLS037_33	1435	8	0.041	0.014	0.048	0.015	0.00828	0.00051	0.13843	0.36	53.6	3.4	46	15	-360	420	53.6	3.4	UC Santa Cruz
15JLS037_34	246	6																	UC Santa Cruz
15JLS037_35	4890	44	0.0786	0.0072	0.136	0.013	0.01259	0.00059	0.0050526	-3.08	77.5	3.7	129.3	12	1050	180	77.5	3.7	UC Santa Cruz
15JLS037_38	891	35	0.54	0.056	1.398	0.12	0.022	0.0018	0.12871	-86.05	54	10.8	897	49	4190	170	54	10.8	UC Santa Cruz	fair; high 207 corr
15JLS037_39	5030	23	0.1327	0.0088	0.214	0.015	0.01189	0.00054	0.11124	-8.16	68	3.2	196.7	13	2110	120	68	3.2	UC Santa Cruz	high 207 corr
15JLS037_40	1157	6	0.256	0.028	0.44	0.041	0.01295	0.00092	-0.11553	-21.67	61.2	5.2	367	29	3160	210	61.2	5.2	UC Santa Cruz	high 207 corr
15JLS037_41	1777	5	0.254	0.022	0.475	0.044	0.01427	0.00082	0.24649	-23.6	67.7	4.6	388	30	3160	150	67.7	4.6	UC Santa Cruz	high 207 corr
15JLS037_42	80900	0	0.1093	0.004	4.455	0.25	0.2983	0.012	0.57638	0	1684	57	1722	46	1784	65	1784	65	UC Santa Cruz
15JLS037_43	2220	-15	0.092	0.011	0.144	0.019	0.01132	0.00064	-0.00031112	-4.1	68.5	4	133	16	1210	260	68.5	4	UC Santa Cruz
15JLS037_44	1771	30	0.233	0.022	0.413	0.038	0.01341	0.00083	0.1409	-19.91	65.9	4.7	346	27	2950	160	65.9	4.7	UC Santa Cruz	high 207 corr
15JLS037_46	911	56	0.335	0.034	0.714	0.069	0.016	0.0012	0.088869	-36.62	65.5	6.6	540	40	3520	180	65.5	6.6	UC Santa Cruz	high 207 corr
15JLS037_51	8250	4	0.0646	0.0045	0.1044	0.0084	0.01197	0.0005	0.24885	-1.64	75.1	3.2	100.4	7.7	740	140	75.1	3.2	UC Santa Cruz
15JLS037_52	7410	56	0.0688	0.0052	0.121	0.01	0.01297	0.00059	0.13008	-2.13	80.9	3.7	115.1	9.4	800	160	80.9	3.7	UC Santa Cruz
15JLS037_53	2230	53	0.279	0.027	0.593	0.063	0.01534	0.00088	0.25238	-28.41	69.7	5.2	461	40	3260	170	69.7	5.2	UC Santa Cruz	high 207 corr
15JLS037_54	47700	6	0.0873	0.0034	2.787	0.16	0.235	0.0098	0.57686	0	1359	51	1350	43	1365	76	1365	76	UC Santa Cruz	fair
15JLS037_56	1903	50	0.199	0.017	0.33	0.029	0.01295	0.00082	0.14465	-15.72	67.2	4.6	288	22	2740	150	67.2	4.6	UC Santa Cruz	fair; high 207 corr
15JLS037_58	104200	19	0.1084	0.0038	4.62	0.26	0.3122	0.012	0.66927	0	1750	60	1757	44	1774	64	1774	64	UC Santa Cruz	fair
15JLS037_59	220000	-27	0.0763	0.0026	1.922	0.1	0.1853	0.007	0.67768	0	1097	38	1091	35	1101	68	1101	68	UC Santa Cruz
15JLS037_60	3500	17	0.1338	0.01	0.1513	0.012	0.00836	0.00042	0.06037	-6.09	47.8	2.5	142.9	10	2100	140	47.8	2.5	UC Santa Cruz	high 207 corr
15JLS037_62	147400	57	0.0763	0.0027	1.726	0.095	0.1658	0.0064	0.67909	0	988	35	1021	36	1104	69	988	35	UC Santa Cruz	fair
15JLS037_63	914	-25	0.335	0.045	0.353	0.059	0.00805	0.00079	0.45659	-18.78	32.9	4.4	301	44	3680	190	32.9	4.4	UC Santa Cruz	zoned:TRIM; high 207 corr
15JLS037_64	814	63	0.546	0.068	1.43	0.16	0.0201	0.0018	0.3453	-79.74	48.3	11.8	846	61	4130	200	48.3	11.8	UC Santa Cruz	high 207 corr
15JLS037_65	5660	90	0.0751	0.0075	0.0679	0.007	0.0069	0.00043	-0.010519	-1.55	42.8	2.7	66.2	6.6	800	210	42.8	2.7	UC Santa Cruz
15JLS037_66	9560	16	0.0923	0.0061	0.1414	0.01	0.01096	0.00048	0.10671	-3.9	66.3	2.9	134.4	9	1450	120	66.3	2.9	UC Santa Cruz
15JLS037_67	3340	43	0.174	0.012	0.452	0.035	0.01931	0.00095	0.17358	-19.26	103.9	5.4	378	23	2550	120	103.9	5.4	UC Santa Cruz	high 207 corr
15JLS037_68	1358	25	0.528	0.058	2.48	0.24	0.0362	0.003	0.16009	-135.88	93.1	18.3	1252	73	4200	180	93.1	18.3	UC Santa Cruz	zoned:TRIM; high 207 corr
15JLS037_69	10	22																	UC Santa Cruz
15JLS037_70	135600	-10	0.0865	0.0031	1.912	0.1	0.1607	0.0063	0.63044	0	960	35	1086	35	1350	69	960	35	UC Santa Cruz
15JLS037_71	5410	21	0.155	0.0096	0.278	0.019	0.01323	0.0006	0.19406	-11.39	73.3	3.5	248	15	2389	110	73.3	3.5	UC Santa Cruz	high 207 corr
15JLS037_72	5180	81	0.0987	0.0071	0.151	0.013	0.01109	0.00052	-0.085948	-4.58	66.5	3.2	141.5	11	1540	140	66.5	3.2	UC Santa Cruz
15JLS037_73	1624	33	0.568	0.047	2.83	0.21	0.0373	0.0025	0.1496	-150.82	84.2	15	1362	53	4330	130	84.2	15	UC Santa Cruz	high 207 corr
15JLS037_74	1446	32	0.279	0.027	0.564	0.054	0.01563	0.001	0.16586	-28.9	71	5.7	442	34	3260	160	71	5.7	UC Santa Cruz	fair; high 207 corr
15JLS037_75	763	0	0.266	0.041	0.277	0.034	0.00864	0.00072	0.14079	-15.23	40.2	4.4	250	25	2920	280	40.2	4.4	UC Santa Cruz	high 207 corr
15JLS037_76	4550	1	0.1317	0.01	0.253	0.02	0.01409	0.00066	-0.13116	-9.5	80.7	3.9	228	16	2080	150	80.7	3.9	UC Santa Cruz	high 207 corr
15JLS037_77	3770	44	0.129	0.012	0.178	0.017	0.00956	0.00052	0.3327	-6.28	55	3.1	164	14	2020	180	55	3.1	UC Santa Cruz	high 207 corr
15JLS037_78	3640	46	0.1515	0.011	0.304	0.023	0.01457	0.00075	0.17882	-12.07	81.1	4.4	268	18	2320	130	81.1	4.4	UC Santa Cruz	high 207 corr
15JLS037_79	1784	50	0.28	0.023	0.601	0.05	0.01595	0.00089	0.20302	-29.67	72.3	5	479	31	3350	130	72.3	5	UC Santa Cruz	high 207 corr
15JLS037_80	4080	44	0.131	0.013	0.242	0.023	0.01395	0.00065	-0.013819	-9.32	80	4	217	18	1960	160	80	4	UC Santa Cruz	high 207 corr
15JLS037_81	702	29	0.411	0.067	0.631	0.068	0.0134	0.0011	0.10134	-39.38	46.6	8.2	488	43	3510	260	46.6	8.2	UC Santa Cruz	high 207 corr
15JLS037_82	70000	99	0.089	0.0064	2.55	0.29	0.2039	0.0094	0.95578	0	1186	44	1233	43	1301	85	1301	85	UC Santa Cruz	76 fair
15JLS037_83	5090	38	0.1182	0.011	0.187	0.016	0.0118	0.00055	0.032554	-6.69	68.9	3.4	172	14	1670	180	68.9	3.4	UC Santa Cruz
15JLS037_84	17400	26	0.0496	0.003	0.1637	0.012	0.0237	0.00098	0.22666	-0.1	150.9	6.2	153.1	10	192	120	150.9	6.2	UC Santa Cruz
15JLS037_85	1158	20	0.221	0.029	0.389	0.045	0.01331	0.0011	-0.036169	-18.42	66.7	6.3	324	32	2840	250	66.7	6.3	UC Santa Cruz	high 207 corr
15JLS037_86	612	24	0.716	0.074	4.3	0.42	0.0479	0.0045	0.32687	-246.92	53.1	28.5	1681	85	4670	210	53.1	28.5	UC Santa Cruz	high 207 corr
15JLS037_87	3310	33	0.138	0.013	0.211	0.021	0.01116	0.00054	0.14037	-8.1	63.4	3.3	191	17	2100	170	63.4	3.3	UC Santa Cruz	high 207 corr
15JLS037_88	1307	60	0.639	0.053	2.5	0.19	0.0305	0.0022	0.17088	-141.85	51.1	13.4	1261	54	4530	140	51.1	13.4	UC Santa Cruz	fair; high 207 corr
15JLS037_89	458700	27	0.1454	0.0047	2.766	0.15	0.137	0.0051	0.8406	0	828	29	1345	40	2294	57	828	29	UC Santa Cruz	fair; discordance
15JLS037_90	718	39	0.283	0.043	0.459	0.063	0.0135	0.0012	-0.022169	-25.21	60.9	7.1	384	43	3120	280	60.9	7.1	UC Santa Cruz
15JLS037_91	9350	11	0.0831	0.0055	0.1358	0.011	0.01184	0.00051	0.18862	-3.41	72.5	3.2	129.2	9.4	1270	130	72.5	3.2	UC Santa Cruz
15JLS037_94	2460	4	0.198	0.017	0.411	0.034	0.01557	0.00088	0.011625	-18.74	80.9	5	353	24	2740	150	80.9	5	UC Santa Cruz	high 207 corr
15JLS037_95	5760	23	0.0864	0.0069	0.155	0.013	0.01277	0.00058	0.11001	-3.98	77.8	3.6	146.7	12	1360	150	77.8	3.6	UC Santa Cruz
15JLS037_96	4470	52	0.1354	0.0099	0.259	0.021	0.01374	0.00067	0.21029	-9.7	78.3	4	231	17	2190	120	78.3	4	UC Santa Cruz	high 207 corr
15JLS037_98	2328	91	0.465	0.033	1.106	0.088	0.01714	0.0012	0.49508	-57.26	52.2	5.8	747	42	4081	110	52.2	5.8	UC Santa Cruz	high 207 corr
15JLS037_99	3390	58	0.256	0.018	0.544	0.039	0.01539	0.00079	0.070697	-25.64	72.8	4.3	438	26	3170	120	72.8	4.3	UC Santa Cruz	high 207 corr
15JLS037-1	3.43705e+06	9.85958	0.106516	0.412933	4.29407	2.45336	0.292382	0.392842	0.160124		1653.42	5.72923	1692.22	20.2082	1740.62	44.3895	1740.62	88.7791	Arizona LaserChron
15JLS037-2	4.4924e+06	304.205	0.0655011	0.330097	0.35498	15.7072	0.0393055	15.4123	0.981225		248.527	37.5752	308.46	41.8066	790.455	63.585	248.527	75.1503	Arizona LaserChron
15JLS037-3	2.33375e+06	493.48	0.0535736	0.146749	0.166778	14.9074	0.022578	13.2588	0.88941		143.929	18.8718	156.619	21.6396	353.147	154.112	143.929	37.7436	Arizona LaserChron
15JLS037-4	2.24967e+06	20.0927	0.0854768	0.303138	2.63237	3.54271	0.223356	1.29173	0.364615		1299.58	15.2032	1309.73	26.0746	1326.36	63.8791	1326.36	127.758	Arizona LaserChron
15JLS037-5	829808	12.0375	0.0716786	0.0728508	1.74606	13.8034	0.176673	1.45298	0.105262		1048.77	14.0634	1025.71	89.3477	976.821	281.032	976.821	562.064	Arizona LaserChron	reverse discordance
15JLS037-6	687758	12.0468	0.048662	0.0238588	0.438159	41.9287	0.0653041	1.13544	0.0270802		407.802	4.48692	368.953	130.42	131.576	1026.65	407.802	8.97384	Arizona LaserChron
15JLS037-7	1.61969e+06	201.089	0.106345	0.26671	3.33626	16.2277	0.227533	15.7886	0.972942		1321.55	188.71	1489.58	127.439	1737.66	68.7688	1737.66	137.538	Arizona LaserChron
15JLS037-8	670002	41.9502	0.0805429	0.128588	2.38664	7.95344	0.214911	1.66705	0.209601		1254.93	19.01	1238.6	56.9716	1210.33	153.287	1210.33	306.575	Arizona LaserChron
15JLS037-9	465336	223.23	0.0783222	0.0420762	2.04311	23.7917	0.189193	1.09765	0.0461357		1117	11.2573	1130	163.593	1155.04	478.235	1155.04	956.47	Arizona LaserChron
15JLS037-10	7.52563e+06	28412.8	0.0416417	0.040888	0.143402	31.0861	0.0249761	19.1885	0.61727		159.028	30.1421	136.069	39.6071	-248.136	626.415	159.028	60.2843	Arizona LaserChron	high 204Pb
15JLS037-11	3.66523e+06	3.71291	0.0584696	0.260776	0.738717	4.00989	0.0916319	1.17227	0.292345		565.181	6.34332	561.656	17.3003	547.382	83.8076	565.181	12.6866	Arizona LaserChron
15JLS037-12	4.38907e+06	2630.68	0.0497199	0.160448	0.114014	7.76874	0.0166313	4.63771	0.596971		106.33	4.89085	109.63	8.0734	181.898	145.314	106.33	9.7817	Arizona LaserChron	high 204Pb
15JLS037-13	7.77673e+06	16.9404	0.109556	0.870689	4.63865	1.7845	0.307081	1.36579	0.765358		1726.32	20.6848	1756.25	14.9072	1792.03	20.9167	1792.03	41.8333	Arizona LaserChron
15JLS037-14	2.25127e+06	9.54618	0.0758578	0.17805	1.8723	5.86007	0.179009	1.67227	0.285368		1061.56	16.3676	1071.34	38.8052	1091.3	112.567	1091.3	225.135	Arizona LaserChron
15JLS037-15	292866	4.66102	0.0778873	0.0465027	1.89204	21.6666	0.176182	2.6483	0.12223		1046.08	25.5725	1078.3	144.904	1143.98	432.29	1143.98	864.579	Arizona LaserChron	low 206/204
15JLS037-16	32371.2	557.929	0.336266	0.0242296	0.0550487	63.888	0.00118731	48.7679	0.763334		7.64933	3.7282	54.4113	33.8598	3645.88	1553.41	7.64933	7.45641	Arizona LaserChron
15JLS037-17	1.60172e+06	11.6194	0.111731	0.281242	5.00954	3.76818	0.32518	1.2476	0.331089		1814.98	19.7354	1820.93	31.9052	1827.74	64.4896	1827.74	128.979	Arizona LaserChron
15JLS037-18	1.95451e+06	115.825	0.0851786	0.196278	2.57636	5.34323	0.219369	1.6103	0.301371		1278.54	18.6752	1293.95	39.1033	1319.59	98.8005	1319.59	197.601	Arizona LaserChron
15JLS037-19	4.77542e+06	119.562	0.177936	0.851949	9.11166	3.56068	0.371392	3.36164	0.944103		2035.95	58.6885	2349.28	32.5902	2633.71	19.5023	2633.71	39.0046	Arizona LaserChron
15JLS037-20	2.60843e+06	1182.07	0.0488323	0.183446	0.0762605	6.16014	0.0113264	2.86912	0.465756		72.6041	2.07141	74.6231	4.43206	139.809	128.081	72.6041	4.14283	Arizona LaserChron	high 204Pb
15JLS037-21	1.83297e+06	100.456	0.0879122	0.354832	1.47747	7.81509	0.12189	7.28926	0.932715		741.433	51.0538	921.194	47.3575	1380.55	54.1671	1380.55	108.334	Arizona LaserChron
15JLS037-22	7.15775e+06	365.335	0.0911631	0.480183	1.14927	8.43217	0.0914326	8.17096	0.969022		564.004	44.1268	776.897	45.8136	1449.99	39.6452	1449.99	79.2905	Arizona LaserChron
15JLS037-23	683773	23.9091	0.0761568	0.0905211	1.88501	11.305	0.179516	2.40085	0.21237		1064.33	23.5551	1075.83	75.138	1099.19	221.667	1099.19	443.334	Arizona LaserChron
15JLS037-24	2.54611e+06	6.97154	0.108281	0.397778	4.50625	2.59257	0.30183	0.633575	0.244381		1700.38	9.46946	1732.13	21.5469	1770.68	45.9112	1770.68	91.8224	Arizona LaserChron
15JLS037-25	5.72729e+06	23.3975	0.109063	0.976712	4.58344	1.16943	0.3048	0.56508	0.483209		1715.07	8.50942	1746.26	9.74783	1783.8	18.6648	1783.8	37.3295	Arizona LaserChron
15JLS037-26	838866	2.11354	0.0755339	0.0957451	1.84068	10.4797	0.17674	0.859525	0.082018		1049.14	8.32206	1060.1	69.0563	1082.76	210.028	1082.76	420.057	Arizona LaserChron
15JLS037-27	2.02963e+06	7.88317	0.075523	0.243077	1.85515	4.32087	0.178155	1.32121	0.305775		1056.89	12.8792	1065.26	28.5145	1082.45	82.5483	1082.45	165.097	Arizona LaserChron
15JLS037-28	6.89761e+06	16.6783	0.101807	0.805409	2.96268	7.38596	0.21106	7.28085	0.985769		1234.46	81.8019	1398.1	56.1274	1657.31	22.9978	1657.31	45.9957	Arizona LaserChron
15JLS037-29	1.05352e+06	216.923	0.0838501	0.120128	2.37633	8.3696	0.205543	0.867805	0.103685		1205.03	9.53806	1235.51	59.8824	1289.06	162.292	1289.06	324.584	Arizona LaserChron
15JLS037-30	2.67644e+06	74.4291	0.102635	0.666403	3.20757	22.2654	0.226661	22.2147	0.997726		1316.98	264.762	1458.99	174.032	1672.3	27.7427	1672.3	55.4854	Arizona LaserChron
15JLS037-31	4.60166e+06	37.6243	0.0478676	0.7254	0.10508	9.74951	0.0159212	9.65156	0.989953		101.826	9.75061	101.455	9.41349	92.7529	32.6469	101.826	19.5012	Arizona LaserChron
15JLS037-32	3.6615e+06	3103.79	0.0569082	0.0652187	0.076647	20.2211	0.00976831	13.183	0.651942		62.665	8.2211	74.9877	14.618	487.954	340.161	62.665	16.4422	Arizona LaserChron	high 204Pb
15JLS037-33	1.04222e+06	11.3963	0.0791219	0.13369	2.14731	7.59257	0.196833	1.30272	0.171578		1158.28	13.8113	1164.19	52.6457	1175.21	148.191	1175.21	296.381	Arizona LaserChron
15JLS037-34	265513	2.31631	0.079103	0.0283934	2.46306	35.2865	0.22583	2.17433	0.0616192		1312.61	25.8224	1261.26	260.394	1174.73	719.355	1174.73	1438.71	Arizona LaserChron	reverse discordance; extremely high error
15JLS037-35	2.26971e+06	492.916	0.0477732	0.0859797	0.0595768	13.7843	0.00904464	7.39823	0.536716		58.0434	4.27491	58.7598	7.86985	88.0756	276.509	58.0434	8.54982	Arizona LaserChron
15JLS037-36	4.1735e+06	48.9683	0.100965	0.926223	2.69101	4.03743	0.193305	3.8904	0.963583		1139.25	40.6264	1325.99	29.8972	1641.91	20.0388	1641.91	40.0777	Arizona LaserChron	discordance
15JLS037-37	3.75964e+06	656.319	0.0485954	0.23683	0.088694	5.9083	0.0132373	4.13268	0.69947		84.773	3.48046	86.2861	4.88747	128.378	99.38	84.773	6.96092	Arizona LaserChron
15JLS037-38	492086	187.622	0.0858305	0.0591403	1.61486	27.2728	0.136456	21.3984	0.784607		824.591	165.667	975.998	172.665	1334.35	329.358	1334.35	658.716	Arizona LaserChron
15JLS037-39	1.77388e+06	33.6204	0.046262	0.113667	0.0654412	8.85533	0.0102595	1.00942	0.11399		65.7999	0.660817	64.3641	5.52281	11.2843	211.94	65.7999	1.32163	Arizona LaserChron
15JLS037-40	3.16437e+06	6.80926	0.0907324	0.849688	3.04737	1.3025	0.243591	0.558029	0.42843		1405.34	7.04626	1419.57	9.958	1440.97	22.4303	1440.97	44.8607	Arizona LaserChron
15JLS037-41	667013	6.99398	0.0470722	0.0431458	0.0719782	23.1905	0.0110901	0.784454	0.0338265		71.0978	0.554665	70.575	15.8121	52.9167	559.553	71.0978	1.10933	Arizona LaserChron
15JLS037-42	4.68999e+06	10812	0.0492187	0.0567487	0.114909	27.9945	0.0169326	21.7526	0.777029		108.241	23.3487	110.446	29.3048	158.251	415.137	108.241	46.6974	Arizona LaserChron	high 204Pb
15JLS037-43	6.49875e+06	665.854	0.115671	0.257752	1.53059	7.05709	0.0959693	5.89495	0.835323		590.744	33.2764	942.736	43.3668	1890.35	69.8438	1890.35	139.688	Arizona LaserChron
15JLS037-44	4.47331e+06	6263.09	0.0494643	0.199061	0.117877	10.4715	0.0172836	9.18786	0.877412		110.466	1629631801493	113.145	11.2122	169.876	117.358	110.466	20.1259	Arizona LaserChron	high 204Pb
15JLS037-45	1.457e+06	20592.7	0.0923158	0.0208432	0.903228	76.5207	0.070961	59.612	0.779031		441.943	254.756	653.451	386.362	1473.87	970.927	441.943	509.512	Arizona LaserChron	high 204Pb; extrmely high error
15JLS037-46	3.66387e+06	4467.49	0.0699158	0.0649866	0.338177	17.5904	0.0350807	8.52285	0.484517		222.268	18.6208	295.79	45.1672	925.879	317.867	222.268	37.2416	Arizona LaserChron	high 204Pb
15JLS037-47	3.05345e+06	97.0773	0.0495509	0.0972579	0.0564195	75.8743	0.00825802	75.1744	0.990776		53.016	39.6915	55.7296	41.1675	173.96	240.436	53.016	79.383	Arizona LaserChron	extremely high error
15JLS037-48	4.55832e+06	48.4053	0.10848	0.850875	3.63088	2.78638	0.24275	2.5264	0.906695		1400.98	31.8126	1556.33	22.1864	1774.04	21.4514	1774.04	42.9028	Arizona LaserChron
15JLS037-49	2.60842e+06	2797.57	0.0490508	0.192565	0.0718022	6.05784	0.0106167	3.11924	0.514909		68.0791	2.11237	70.4083	4.12072	150.282	121.752	68.0791	4.22475	Arizona LaserChron	high 204Pb
15JLS037-50	2.55796e+06	131.872	0.0909402	0.425857	2.699	5.30111	0.215252	4.75265	0.896539		1256.74	54.2681	1328.19	39.2945	1445.33	44.7322	1445.33	89.4644	Arizona LaserChron
15JLS037-51	2.20104e+06	30.9965	0.0879254	0.218481	2.53918	8.01158	0.209449	6.5754	0.820738		1225.88	73.4091	1283.34	58.4276	1380.84	87.9966	1380.84	175.993	Arizona LaserChron
15JLS037-52	4.4828e+06	17809.2	0.0575387	0.0203242	0.105662	50.9872	0.0133185	13.3723	0.262269		85.2899	11.3302	101.989	49.5142	512.221	1149.38	85.2899	22.6603	Arizona LaserChron	high 204Pb
15JLS037-53	6.21739e+06	29732.4	0.0515179	0.0339233	0.156575	29.6856	0.0220427	3.5024	0.117983		140.553	4.86944	147.701	40.8281	264.092	690.005	140.553	9.73887	Arizona LaserChron	high 204Pb
15JLS037-54	3.00124e+06	2368.93	0.0482411	0.265786	0.0723192	5.96513	0.0108726	4.62892	0.775997		69.7113	3.2095	70.8979	4.0849	111.086	88.8285	69.7113	6.41899	Arizona LaserChron	high 204Pb
15JLS037-55	2.27546e+06	45600	0.0670847	0.0132511	0.0340465	75.8813	0.00368085	7.93518	0.104574		23.6847	1.87598	33.9948	25.3739	840.386	1897.41	23.6847	3.75195	Arizona LaserChron	high 204Pb
15JLS037-56	1.14804e+07	21.215	0.109707	4.80381	4.47856	0.857789	0.296076	0.832147	0.970106		1671.82	12.2544	1727.01	7.12016	1794.53	3.79018	1794.53	7.58037	Arizona LaserChron
15JLS037-57	4.73849e+06	58.95	0.104525	0.895494	4.15345	2.01409	0.288195	1.67616	0.83222		1632.5	24.1736	1664.89	16.4838	1705.96	20.5566	1705.96	41.1131	Arizona LaserChron
15JLS037-58	5.38999e+06	21.9196	0.109073	1.0985	3.89521	2.10395	0.259008	1.89682	0.901549		1484.77	25.1554	1612.69	17.0007	1783.97	16.5948	1783.97	33.1895	Arizona LaserChron
15JLS037-59	5.48174e+06	26.8447	0.109151	0.97403	2.58803	3.88895	0.171965	3.75099	0.964524		1022.93	35.4808	1297.26	28.4898	1785.28	18.7127	1785.28	37.4254	Arizona LaserChron	discordance
15JLS037-60	1.48592e+06	4.66458	0.0760461	0.329922	1.85932	3.53411	0.177327	1.81737	0.514238		1052.36	17.6458	1066.74	23.3388	1096.3	60.6833	1096.3	121.367	Arizona LaserChron
15JLS037-61	4.006e+06	278.379	0.0849738	0.116588	1.16037	10.6726	0.09904	6.35098	0.595076		608.781	36.8945	782.129	58.2698	1314.92	166.638	608.781	73.7889	Arizona LaserChron
15JLS037-62	3.30058e+06	43.2772	0.103212	0.402284	4.05904	2.89795	0.285228	1.4896	0.514018		1617.64	21.3109	1646.12	23.6132	1682.65	45.9008	1682.65	91.8015	Arizona LaserChron
15JLS037-63	170026	2.58356	0.0894557	0.024205	2.25837	41.5088	0.183099	4.0195	0.0968348		1083.88	40.1015	1199.4	300.608	1413.92	827.479	1413.92	1654.96	Arizona LaserChron	extremely high error
15JLS037-64	3.24837e+06	970.874	0.0485056	0.317911	0.0886727	4.29304	0.0132586	2.92161	0.680546		84.9086	2.46443	86.2662	3.5505	123.981	74.0858	84.9086	4.92886	Arizona LaserChron	high 204Pb
15JLS037-65	2.91182e+06	5001.53	0.0506303	0.195814	0.0869243	7.04298	0.0124517	4.85008	0.68864		79.7733	3.84523	84.6341	5.71916	224.018	118.137	79.7733	7.69045	Arizona LaserChron	high 204Pb
15JLS037-66	2.99684e+06	4308.84	0.0492132	0.129537	0.0842887	8.63253	0.0124219	3.86332	0.44753		79.5832	3.05565	82.169	6.81395	158.008	180.868	79.5832	6.1113	Arizona LaserChron	high 204Pb
15JLS037-67	5.73915e+06	159.814	0.100852	0.886395	1.62369	4.37403	0.116766	4.22603	0.966165		711.921	28.4844	979.418	27.4921	1639.83	20.9432	1639.83	41.8864	Arizona LaserChron
15JLS037-68	1.04993e+06	3.53979	0.07551	0.32707	1.83524	3.11768	0.176274	0.609862	0.195614		1046.58	5.89154	1058.16	20.4939	1082.1	61.3413	1082.1	122.683	Arizona LaserChron
15JLS037-69	6.54199e+06	13.2404	0.10923	1.11348	4.65073	1.23878	0.308802	0.853236	0.688773		1734.81	12.9776	1758.43	10.3527	1786.59	16.3662	1786.59	32.7325	Arizona LaserChron
15JLS037-71	222831	16.6504	0.0619188	0.0291291	1.4407	35.1586	0.168752	7.58803	0.215823		1005.23	70.6305	906.011	213.833	671.285	755.639	1005.23	141.261	Arizona LaserChron	reverse discordance
15JLS037-72	2.63753e+06	67.2647	0.0484023	0.269249	0.0664834	12.0216	0.00996199	11.4335	0.95108		63.9013	7.27009	65.3569	7.60959	118.958	87.5808	63.9013	14.5402	Arizona LaserChron
15JLS037-73	3.27396e+06	2493.12	0.0453023	0.15383	0.0794891	9.12856	0.0127258	6.40873	0.702053		81.5183	5.1914	77.6645	6.8254	-39.3464	158.009	81.5183	10.3828	Arizona LaserChron	high 204Pb
15JLS037-74	4.25415e+06	5839.22	0.0492351	0.155055	0.102865	9.52692	0.0151527	7.01203	0.736023		96.9479	6.74716	99.4173	9.02274	159.066	151.051	96.9479	13.4943	Arizona LaserChron	high 204Pb
15JLS037-75	1.24458e+06	49.4405	0.0939809	0.263499	3.36362	3.84997	0.259577	0.647781	0.168256		1487.68	8.60575	1495.97	30.1422	1507.71	71.7053	1507.71	143.411	Arizona LaserChron
15JLS037-76	2.5218e+06	27.4526	0.0754235	0.441224	1.95763	2.49385	0.188244	1.04049	0.417222		1111.86	10.6261	1101.07	16.762	1079.79	45.5005	1079.79	91.001	Arizona LaserChron
15JLS037-77	391145	9.3835	0.0821522	0.0441129	2.55053	22.7753	0.22517	2.19693	0.0964611		1309.13	26.0286	1286.59	167.63	1249.13	449.46	1249.13	898.921	Arizona LaserChron
15JLS037-78	2.0212e+06	27.1187	0.0778547	0.520382	1.96699	2.18445	0.183238	1.03876	0.475524		1084.64	10.37	1104.28	14.7058	1143.15	38.2015	1143.15	76.403	Arizona LaserChron
15JLS037-79	4.43709e+06	54.1566	0.0742093	0.911374	1.14616	2.44307	0.112017	2.18281	0.893469		684.452	14.1745	775.426	13.2487	1047.18	22.1439	684.452	28.349	Arizona LaserChron
15JLS037-80	1.94499e+06	22.2438	0.0915139	0.238297	3.11642	5.03743	0.246983	2.78667	0.553193		1422.9	35.5808	1436.75	38.7423	1457.3	79.8335	1457.3	159.667	Arizona LaserChron
15JLS037-81	112082	5.34796	0.14351	0.00136917	0.112976	730.412	0.00570957	7.62031	0.0104329		36.7016	2.78883	108.684	968.312	2269.98	0	36.7016	5.57765	Arizona LaserChron
15JLS037-82	3.66746e+06	948.527	0.0489106	0.376576	0.0903654	6.78111	0.0133998	6.23953	0.920134		85.807	5.31848	87.8437	5.70645	143.559	62.3366	85.807	10.637	Arizona LaserChron	high 204Pb
15JLS037-83	569277	32.4993	0.0752019	0.0831432	1.88758	12.1758	0.182043	1.89467	0.15561		1078.13	18.8102	1076.73	80.9872	1073.92	242.369	1073.92	484.737	Arizona LaserChron
15JLS037-84	4.44429e+06	270.381	0.0479753	0.627794	0.108664	4.57966	0.0164273	4.29372	0.937563		105.037	4.47344	104.742	4.55776	98.0741	37.6921	105.037	8.94688	Arizona LaserChron
15JLS037-85	3.34312e+06	32.9834	0.108378	0.723671	4.06351	7.74561	0.271931	7.62135	0.983957		1550.6	105.047	1647.01	63.1968	1772.32	25.2281	1772.32	50.4562	Arizona LaserChron
15JLS037-86	1.47578e+06	27.2401	0.0755578	0.245988	1.89299	4.13859	0.181706	0.775676	0.187425		1076.29	7.68878	1078.63	27.5036	1083.36	81.5598	1083.36	163.12	Arizona LaserChron
15JLS037-87	2.60738e+06	14.8664	0.109093	0.690961	4.40875	1.9288	0.293102	1.27504	0.661051		1657.01	18.6306	1713.99	15.9651	1784.3	26.3834	1784.3	52.7669	Arizona LaserChron
15JLS037-88	4.90441e+06	1504.82	0.0486407	0.228907	0.138875	7.48511	0.0207073	6.07801	0.812014		132.124	7.9488	132.041	9.26804	130.541	102.806	132.124	15.8976	Arizona LaserChron	high 204Pb
15JLS037-89	1.09663e+06	1927.42	0.0487329	0.0561811	0.0345533	19.0773	0.0051424	6.86419	0.35981		33.0651	2.26384	34.4923	6.46976	135.004	421.185	33.0651	4.52768	Arizona LaserChron	high 204Pb
15JLS037-90	1.13181e+06	2070.36	0.0496255	0.127441	0.0386565	7.96851	0.00564957	1.38754	0.174128		36.317	0.502495	38.5115	3.01133	177.47	183.194	36.317	1.00499	Arizona LaserChron	high 204Pb
15JLS037-91	3.24955e+06	22.4668	0.0750382	0.23273	1.85042	4.383	0.178849	0.864904	0.197331		1060.68	8.45891	1063.58	28.8988	1069.54	86.3873	1069.54	172.775	Arizona LaserChron
15JLS037-92	5.46117e+06	447.856	0.0963226	0.837339	1.13395	14.5161	0.0853816	14.4669	0.99661		528.165	73.3661	769.635	78.4791	1554.06	22.4189	1554.06	44.8379	Arizona LaserChron
15JLS037-93	2.94837e+06	593.051	0.0860626	0.298237	2.33147	7.00738	0.196478	6.15309	0.878087		1156.37	65.1381	1221.93	49.8342	1339.57	64.8187	1339.57	129.637	Arizona LaserChron
15JLS037-94	148510	18.1059	0.0413378	0.00617142	1.02077	162.062	0.179094	2.81403	0.0173639		1062.02	27.5538	714.302	1170.41	-266.701	0	1062.02	55.1076	Arizona LaserChron	discordance
15JLS037-95	5.20483e+06	21.6751	0.108426	0.795374	4.63933	1.63225	0.310327	1.04091	0.637718		1742.32	15.8918	1756.37	13.6355	1773.13	22.9511	1773.13	45.9023	Arizona LaserChron
15JLS037-96	630242	5.85621	0.0820438	0.0925082	2.61098	11.0429	0.230811	2.25672	0.20436		1338.75	27.2813	1303.73	81.2489	1246.58	212.284	1246.58	424.567	Arizona LaserChron	reverse discordance
15JLS037-97	23832.1	5.60163	4.70756	0.000489505	1.22215	2042.96	0.00188289	18.3851	0.00899924		12.1265	2.22737	810.756				12.1265	4.45475	Arizona LaserChron
15JLS037-98	3.70047e+06	4809.04	0.0527382	0.0470372	0.103179	21.8042	0.0141894	4.84198	0.222067		90.828	4.36704	99.7066	20.7098	317.529	488.219	90.828	8.73408	Arizona LaserChron	high 204Pb
15JLS037-99	4.10156e+06	1690.61	0.0494079	0.198705	0.100945	5.60983	0.0148179	2.47854	0.441821		94.8213	2.33298	97.6479	5.22277	167.212	117.644	94.8213	4.66596	Arizona LaserChron	high 204Pb
15JLS037-100	4.97043e+06	1009.66	0.18523	1.51256	13.4643	4.504	0.527196	4.45521	0.989168		2729.63	99.1512	2712.78	42.596	2700.25	10.9175	2700.25	21.8351	Arizona LaserChron	high 204Pb
15JLS037-101	1.89821e+06	97.248	0.0483805	0.277766	0.0969572	6.14949	0.0145348	4.98549	0.810716		93.0228	4.60434	93.9637	5.51904	117.933	84.8881	93.0228	9.20869	Arizona LaserChron
15JLS037-102	1.11255e+06	18.0692	0.056112	0.0977147	0.641896	10.2666	0.0829674	0.819434	0.0798153		513.811	4.04692	503.48	40.7765	456.795	227.564	513.811	8.09383	Arizona LaserChron
15JLS037-103	724112	33.8583	0.0760597	0.154721	1.95753	6.64518	0.186661	1.54425	0.232386		1103.26	15.6589	1101.04	44.6886	1096.65	129.48	1096.65	258.96	Arizona LaserChron
15JLS037-104	5.71851e+06	3944.53	0.0483389	0.163627	0.0892445	69.1555	0.0133901	68.885	0.996087		85.7452	58.676	86.7993	57.5941	115.878	144.246	85.7452	117.352	Arizona LaserChron	high 204Pb; extremely high error
15JLS037-105	5.82865e+06	3720.54	0.048925	0.097031	0.0330917	341.722	0.00490555	341.566	0.999545		31.5459	107.497	33.0568	111.59	144.214	242.323	31.5459	214.994	Arizona LaserChron	high 204Pb; extremely high error
15JLS037-106	823441	5.01942	0.0735525	0.0895698	1.91382	11.2438	0.188713	1.33304	0.118558		1114.4	13.6424	1085.92	75.1229	1029.2	226.401	1029.2	452.802	Arizona LaserChron	reverse discordance
15JLS037-107	1.46257e+06	35.9625	0.0827128	0.203245	0.992189	13.985	0.0870003	13.091	0.936069		537.772	67.5455	699.837	70.8372	1262.46	96.1838	537.772	135.091	Arizona LaserChron
15JLS037-108	3.16571e+06	2086.35	0.0485004	0.195002	0.07683	17.3757	0.0114891	16.6017	0.955456		73.641	12.1561	75.1602	12.5886	123.726	120.835	73.641	24.3122	Arizona LaserChron	high 204Pb
15JLS037-109	3.07268e+06	43.6851	0.106008	0.370787	2.66202	14.5277	0.182127	14.2751	0.982617		1078.58	141.8	1317.98	107.631	1731.84	49.4918	1731.84	98.9836	Arizona LaserChron	discordance
15JLS037-110	3.857e+06	200.657	0.100979	0.577061	1.59451	7.19146	0.114523	6.97954	0.970533		698.963	46.2335	968.063	44.9057	1642.17	32.1608	1642.17	64.3216	Arizona LaserChron
15JLS037-111	430842	1.17826	0.0763069	0.0595117	1.87569	16.8165	0.178277	0.662064	0.03937		1057.56	6.45753	1072.54	111.824	1103.14	338.306	1103.14	676.612	Arizona LaserChron
15JLS037-112	1.04298e+06	16.8239	0.0754644	0.115277	1.78385	11.042	0.171441	6.83184	0.618716		1020.05	64.4562	1039.58	71.9639	1080.9	174.347	1080.9	348.694	Arizona LaserChron
15JLS037-113	4.65301e+06	8316.53	0.0527581	0.0437936	0.127553	25.8584	0.0175348	12.1347	0.469273		112.057	13.4802	121.897	29.7105	318.386	525.111	112.057	26.9605	Arizona LaserChron	high 204Pb
15JLS037-114	2.96453e+06	0.775755	0.108731	0.568082	4.30154	3.43411	0.286925	2.94863	0.85863		1626.14	42.3799	1693.66	28.2995	1778.25	32.1156	1778.25	64.2311	Arizona LaserChron
15JLS037-115	331953	639.153	0.0519502	0.0769579	0.0139508	13.5994	0.00194765	4.01195	0.29501		12.5432	0.502737	14.0675	1.89991	283.243	298.338	12.5432	1.00547	Arizona LaserChron
15JLS037-116	3.37018e+06	37.2944	0.102606	0.611576	3.42953	4.56347	0.242415	4.26047	0.933604		1399.24	53.5894	1511.19	35.8908	1671.77	30.2323	1671.77	60.4646	Arizona LaserChron
15JLS037-117	2.92883e+06	10.7204	0.0668385	0.16005	0.869322	8.97275	0.0943307	6.4399	0.717718		581.099	35.7854	635.199	42.394	832.755	130.361	581.099	71.5709	Arizona LaserChron
15JLS037-118	1.4911e+06	23.6048	0.0766883	0.177729	1.88002	5.6593	0.1778	0.607911	0.107418		1054.94	5.91586	1074.07	37.5281	1113.08	112.427	1113.08	224.854	Arizona LaserChron
15JLS037-119	1.67322e+06	21.7262	0.0768971	0.266366	1.73662	4.02538	0.163793	1.45239	0.360808		977.819	13.1771	1022.21	25.9431	1118.54	74.9417	1118.54	149.883	Arizona LaserChron
15JLS037-120	1656.62	19.3658	35.2008	0.00150786	13.7603	685.657	0.00283513	174.068	0.25387		18.2506	31.7236	2733.35				18.2506	63.4473	Arizona LaserChron	extrmely high error
Humboldt Formation middle–upper section sample 15JLS041:
15JLS041-1	13226.3	54.3876	-3.8442	0.00187876	-1.05094	533.544	0.00198275	36.8872	0.0691362		12.769	4.70546					12.769	9.41093	Arizona LaserChron
15JLS041-2	18190.9	46.2179	-9.74927	0.00054426	-2.70407	1837.53	0.00201162	25.4262	0.0138372		12.9547	3.29058					12.9547	6.58116	Arizona LaserChron
15JLS041-3	85940.7	3567.02	0.0894507	0.00446971	0.0264694	224.176	0.00214614	14.1618	0.0631729		13.8201	1.95508	26.527	58.7626			13.8201	3.91017	Arizona LaserChron	high 204Pb
15JLS041-4	35811.4	294.974	0.328832	0.00808885	0.0588005	172.388	0.00129689	120.141	0.696925		8.35491	1312045094074	58.0156	97.5069	3611.64	1155.91	8.35491	20.0624	Arizona LaserChron	extrmely high error; extremely high error
15JLS041-5	73054.6	2475.74	-0.131048	0.00976133	-0.0389398	104.674	0.00215507	21.4837	0.205245		13.8775	2.9782	-40.3292	-43.0894			13.8775	5.9564	Arizona LaserChron	high 204Pb
15JLS041-6	67750.8	451.546	0.153266	0.0199648	0.0424464	50.9667	0.0020086	9.4222	0.18487		12.9353	1.21757	42.2098	21.075	2382.68	921.664	12.9353	2.43513	Arizona LaserChron
15JLS041-7	462013	16.6352	0.0476845	0.0320993	0.0151736	31.1796	0.00230786	1.27989	0.041049		14.8603	0.189977	15.2913	4.73208	83.6225	755.221	14.8603	0.379954	Arizona LaserChron
15JLS041-8	39252.6	1169.02	0.370366	0.00966754	0.228811	176.877	0.00448069	143.478	0.811173		28.8199	41.2585	209.217	347.367	3792.92	1335.82	28.8199	82.517	Arizona LaserChron	high 204Pb; extremely high error
15JLS041-9	25150.8	23.5074	-0.590514	0.00305576	-0.177826	327.673	0.00218406	16.6303	0.0507528		14.064	2.33634	-198.815	-898.209			14.064	4.67268	Arizona LaserChron
15JLS041-10	47064.6	1663.54	0.0193959	0.00170715	0.00704776	585.814	0.00263537	7.08662	0.0120971		16.9663	1.20076	7.13108	41.6518			16.9663	2.40152	Arizona LaserChron	high 204Pb
15JLS041-11	24157	116.242	0.360592	0.00326894	0.117386	306.57	0.00236102	20.1101	0.0655971		15.2022	3.05357	112.7	339.086	3752.35	700.3	15.2022	6.10713	Arizona LaserChron
15JLS041-12	76712.6	2949.82	-0.105047	0.00627764	-0.0468233	159.418	0.0032328	6.24641	0.0391826		20.8064	1.29756	-48.6926	-79.6794			20.8064	2.59511	Arizona LaserChron	high 204Pb
15JLS041-13	30705.3	357.509	0.114955	0.014596	0.037668	68.8722	0.00237654	7.03571	0.102156		15.302	1.07532	37.5447	25.3909	1879.16	1447.96	15.302	2.15065	Arizona LaserChron
15JLS041-14	34679.2	6.52251	-0.372899	0.00356286	-0.119722	280.886	0.00232853	10.9274	0.0389032		14.9932	1.63647	-129.479	-408.613			14.9932	3.27293	Arizona LaserChron
15JLS041-15	11485.1	296.618	2.9081	0.00457342	0.14543	590.559	0.000362697	548.589	0.928932		2.33767	12.8219	137.869	987.473			2.33767	25.6438	Arizona LaserChron	extrmely high error
15JLS041-16	49061.8	1749.38	0.0318485	0.00131573	0.0154588	760.057	0.00352033	6.06059	0.00797386		22.6537	1.37054	15.5765	118.015			22.6537	2.74107	Arizona LaserChron	high 204Pb
15JLS041-17	114198	18.1527	0.069906	0.00999058	0.022046	100.195	0.00228726	4.48554	0.0447682		14.7278	0.659866	22.142	21.9484	925.604	356.838	14.7278	1.31973	Arizona LaserChron
15JLS041-18	26283.9	1.23084	-3.45145	0.000635986	-1.11541	1572.48	0.00234386	19.5678	0.0124439		15.0918	2.94967					15.0918	5.89935	Arizona LaserChron
15JLS041-19	42945.1	73.966	1.58128	0.00139218	0.443252	718.483	0.00203302	16.3565	0.0227653		13.0924	2.13928	372.543				13.0924	4.27857	Arizona LaserChron
15JLS041-20	6045.25	62.8784	-7.47797	0.000615365	-2.55679	1626.03	0.00247976	56.3096	0.0346302		15.9658	8.97913					15.9658	17.9583	Arizona LaserChron	extremely high error
15JLS041-21	20430.6	18.0837	1.35949	0.00110809	0.414993	902.8	0.00221392	25.0035	0.0276955		14.2561	3.56059	352.465				14.2561	7.12117	Arizona LaserChron
15JLS041-22	63997	150.106	0.137266	0.0214127	0.0485658	47.0431	0.00256606	5.66069	0.12033		16.5207	0.933988	48.1528	22.1273	2192.98	866.156	16.5207	1.86798	Arizona LaserChron
15JLS041-23	100598	21.7679	0.0565838	0.0145942	0.0179727	68.5829	0.00230367	2.92271	0.0426158		14.8334	0.433038	18.0871	12.2955	475.336	1738.05	14.8334	0.866076	Arizona LaserChron
15JLS041-24	21025.8	23.2242	0.534746	0.00429541	0.172042	233.388	0.00233338	16.4662	0.0705529		15.0244	2.47107	161.19	362.512			15.0244	4.94214	Arizona LaserChron
15JLS041-25	153574	6867.83	0.284924	0.0236029	0.47117	43.6756	0.0119935	10.6082	0.242886		76.8553	8.10454	391.997	142.968			76.8553	16.2091	Arizona LaserChron	high 204Pb
15JLS041-26	41573.8	1371.5	0.0717618	0.00783125	0.020804	128.007	0.00210258	8.95489	0.0699562		13.5399	1.21121	20.9073	26.4952			13.5399	2.42242	Arizona LaserChron	high 204Pb
15JLS041-27	32880.1	694.534	0.080584	0.010543	0.0336921	96.7029	0.00303235	18.8433	0.194857		19.5182	3.6723	33.6468	32.0148	1211.3	132.759	19.5182	7.3446	Arizona LaserChron
15JLS041-28	53628.1	1784.74	0.190842	0.0166461	0.0883412	60.7811	0.00335728	9.24241	0.152061		21.6062	1.99359	85.957	50.136			21.6062	3.98718	Arizona LaserChron	high 204Pb
15JLS041-29	78940.4	11.5259	5.08111	0.000126767	1.6019	7888.49	0.00228652	4.50578	0.000571184		14.723	0.662631	970.952				14.723	1.32526	Arizona LaserChron
15JLS041-30	22236.4	393.916	0.316087	0.0049719	0.041722	236.31	0.000957321	124.053	0.524957		6.16833	7.64833	41.5039	96.3889	3550.89	856.856	6.16833	15.2967	Arizona LaserChron	extrmely high error
15JLS041-31	41701	142.592	0.41583	0.0018226	0.110552	548.892	0.00192819	15.7539	0.0287013		12.418	1.95443	106.47	622.676	3967.33	372.544	12.418	3.90886	Arizona LaserChron
15JLS041-32	100136	227.045	0.0749775	0.025771	0.0252548	39.1314	0.00244294	5.05602	0.129206		15.729	0.794291	25.3249	9.7877	1067.92	810.738	15.729	1.58858	Arizona LaserChron
15JLS041-33	423871	38.8339	0.0469314	0.057458	0.0148751	17.5134	0.00229878	1.95448	0.111599		14.8018	0.288967	14.9927	2.60645	45.7286	418.594	14.8018	0.577934	Arizona LaserChron
15JLS041-34	31249.5	670.939	0.507958	0.0331253	0.0750259	116.652	0.00107123	112.678	0.965933		6.90189	7.77275	73.4576	82.8468			6.90189	15.5455	Arizona LaserChron	extrmely high error
15JLS041-35	13869.9	9.65632	0.413916	0.00385749	0.121756	263.22	0.00213341	45.6241	0.173331		13.7382	6.26127	116.662	298.398	3960.4	941.667	13.7382	12.5225	Arizona LaserChron
15JLS041-36	19724.5	53.4695	0.482353	0.00221641	0.153694	451.578	0.00231094	18.9661	0.0419996		14.8801	2.81892	145.168	706.331			14.8801	5.63784	Arizona LaserChron
15JLS041-37	25796.4	31.1452	-0.142316	0.00501436	-0.0418982	200.009	0.00213521	15.2409	0.0762013		13.7498	2.09336	-43.4597	-89.0378			13.7498	4.18672	Arizona LaserChron
15JLS041-38	39090.2	438.625	0.31455	0.00386948	0.116479	260.823	0.0026857	35.23	0.135072		17.2899	6.08308	111.875	283.435	3543.38	688.577	17.2899	12.1662	Arizona LaserChron
15JLS041-39	21404.5	3.2924	0.797323	0.00406581	0.222138	247.008	0.00202063	22.7968	0.0922917		13.0127	2.96348	203.688	490.841			13.0127	5.92696	Arizona LaserChron
15JLS041-40	43697.4	14.8545	0.209513	0.00370083	0.0652676	270.544	0.00225936	13.4584	0.0497455		14.5484	1.95576	64.1987	169.876	2901.77	237.865	14.5484	3.91153	Arizona LaserChron
15JLS041-41	57048.1	45.5618	0.0630604	0.0192487	0.018165	54.6422	0.00208918	16.935	0.309925		13.4537	2.27601	18.2789	9.89894	710.288	1185.7	13.4537	4.55202	Arizona LaserChron
15JLS041-42	21724.5	30.6684	-0.748518	0.00359549	-0.229163	279.13	0.00222045	23.6575	0.0847545		14.2981	3.37882	-264.282	-1205.86			14.2981	6.75765	Arizona LaserChron
15JLS041-43	88373.4	3609.75	0.102946	0.0048838	0.07586	208.586	0.00534445	39.7726	0.190678		34.3608	13.6298	74.2451	150.429			34.3608	27.2597	Arizona LaserChron	high 204Pb
15JLS041-44	8054.98	9.54893	0.631637	0.00659538	0.230469	160.056	0.00264633	51.2716	0.320336		17.0368	8.72351	210.586	314.043			17.0368	17.447	Arizona LaserChron	extremely high error
15JLS041-45	27653.3	63.7653	0.18166	0.0069396	0.0557523	144.488	0.00222589	10.5743	0.0731845		14.333	1.51393	55.0882	77.6261	2668.07	526.45	14.333	3.02786	Arizona LaserChron
15JLS041-46	35864	1296.01	0.134676	0.00890968	0.0204788	117.469	0.00110284	34.6654	0.295102		7.10544	2.46177	20.5837	23.9405			7.10544	4.92354	Arizona LaserChron	high 204Pb
15JLS041-47	137960	265.795	0.0377971	0.0367098	0.0117926	27.4417	0.00226282	3.31555	0.120822		14.5706	0.48255	11.904	3.24759	-499.438	736.235	14.5706	0.9651	Arizona LaserChron
15JLS041-48	21708.2	16.3068	-0.143933	0.00320688	-0.0441727	312.564	0.00222583	21.402	0.0684725		14.3327	3.06408	-45.873	-147.704			14.3327	6.12815	Arizona LaserChron
15JLS041-49	10158.6	2.25027	-1.17361	0.0012662	-0.357854	796.752	0.00221147	105.31	0.132174		14.2403	14.9799	-449.753				14.2403	29.9599	Arizona LaserChron	extrmely high error
15JLS041-50	30883.1	423.422	-0.0184363	0.00590113	-0.0058457	171.495	0.00229964	26.3467	0.15363		14.8074	3.8968	-5.95304	-10.2395	0	776.166	14.8074	7.7936	Arizona LaserChron
15JLS041-51	56780.2	1699.94	0.0409917	0.00195408	0.00787523	512.422	0.00139337	26.2292	0.0511867		8.97597	2.35268	7.96505	40.6767			8.97597	4.70536	Arizona LaserChron	high 204Pb
15JLS041-52	23722.1	817.984	0.114491	0.00529084	0.0301123	193.928	0.00190753	43.4136	0.223865		12.285	5.32829	30.1242	57.6229			12.285	10.6566	Arizona LaserChron	high 204Pb
15JLS041-53	16485.1	8.77303	0.274632	0.00921165	0.0956975	127.487	0.00252725	66.8444	0.524322		16.2711	10.8626	92.797	113.53	3332.67	1060.25	16.2711	21.7253	Arizona LaserChron	extremely high error
15JLS041-54	5078.18	5.21751	0.118594	0.0037793	0.0381951	272.494	0.00233585	65.1167	0.238966		15.0403	9.78235	38.0604	102.136	1935.13	458.542	15.0403	19.5647	Arizona LaserChron	extremely high error
15JLS041-55	37836.4	1361.7	0.242504	0.0129214	0.0311793	90.788	0.000932496	47.4664	0.522827		6.00846	2.85067	31.1754	27.8805			6.00846	5.70135	Arizona LaserChron	high 204Pb
15JLS041-56	163875	14.5587	0.0463164	0.0249324	0.0146993	40.1798	0.00230176	2.39419	0.0595869		14.821	0.354436	14.8167	5.91018	14.1006	1000.04	14.821	0.708872	Arizona LaserChron
15JLS041-57	34905.3	47.3927	-6.05078	0.000252998	-1.88357	3952.64	0.00225771	16.1768	0.00409266		14.5377	2.34909					14.5377	4.69819	Arizona LaserChron
15JLS041-58	9978.19	18.5857	3.02311	0.0011259	0.877386	889.273	0.00210492	44.0651	0.0495519		13.5549	5.96672	639.57				13.5549	11.9334	Arizona LaserChron
15JLS041-59	77738.2	0.370175	0.0557642	0.0222196	0.0185006	46.2038	0.00240619	10.4551	0.226282		15.4926	1.61782	18.6135	8.52201	442.97	1051.74	15.4926	3.23565	Arizona LaserChron
15JLS041-60	29626.4	330.498	4.02791	0.000458415	0.110276	3396.72	0.000198564	2603.66	0.766523		1.2799	33.3212	106.218				1.2799	66.6424	Arizona LaserChron	extrmely high error
15JLS041-61	31220.4	34.7256	0.501887	0.00486763	0.154859	206.169	0.00223785	17.3408	0.0841095		14.41	2.49601	146.193	288.212			14.41	4.99202	Arizona LaserChron
15JLS041-62	15489.8	12.5411	0.361419	0.00531845	0.112671	191.736	0.002261	37.5421	0.195801		14.5589	5.45955	108.406	199.677	3755.82	1017.8	14.5589	10.9191	Arizona LaserChron
15JLS041-63	109752	1.1592	0.0732974	0.00798583	0.022802	125.299	0.00225622	4.3909	0.0350435		14.5282	0.6372	22.8927	28.3707	1022.17	457.763	14.5282	1.2744	Arizona LaserChron
15JLS041-64	10439.7	1.19995	1.16756	0.00334887	0.393516	304.431	0.00244445	59.2548	0.194641		15.7387	9.31455	336.935	1312.01			15.7387	18.6291	Arizona LaserChron	extremely high error
15JLS041-65	14930.5	11.399	0.517968	0.00440516	0.144481	230.754	0.00202305	41.4163	0.179483		13.0283	5.39038	137.028	304.61			13.0283	10.7808	Arizona LaserChron
15JLS041-66	19323	170.023	0.286477	0.0114796	0.119186	91.6148	0.00301741	28.3723	0.309691		19.4222	5.50222	114.334	99.3809	3398.59		19.4222	11.0044	Arizona LaserChron
15JLS041-67	38963.9	574.139	0.0814134	0.00766869	0.0204782	131.352	0.00182429	15.7791	0.120128		11.7494	1.85226	20.5831	26.7703	1231.46	341.073	11.7494	3.70452	Arizona LaserChron
15JLS041-68	33151	247.489	0.642544	0.00407692	0.164339	245.747	0.00185497	15.1007	0.061448		11.9468	1.80238	154.494	367.433			11.9468	3.60476	Arizona LaserChron
15JLS041-69	37888.9	9.36574	0.188328	0.00371366	0.0569886	270.733	0.00219468	28.0493	0.103605		14.1323	3.95968	56.2765	149.28	2727.6	120.386	14.1323	7.91935	Arizona LaserChron
15JLS041-70	26101.4	16.8912	-1.00941	0.00169921	-0.294478	588.644	0.00211585	12.6352	0.0214649		13.6253	1.71976	-354.183				13.6253	3.43951	Arizona LaserChron
15JLS041-71	30421.1	14.4815	1.29016	0.00151459	0.398184	660.377	0.00223841	13.2352	0.0200419		14.4136	1.90554	340.33				14.4136	3.81108	Arizona LaserChron
15JLS041-72	172325	3.66596	0.0463899	0.0159075	0.0150919	62.913	0.0023595	2.49399	0.0396419		15.1924	0.37845	15.2096	9.49778	17.9112	1674.39	15.1924	0.7569	Arizona LaserChron
15JLS041-73	27672.8	30.6248	-0.478006	0.00255781	-0.157856	391.171	0.00239512	12.8829	0.0329341		15.4215	1.98435	-174.448	-950.081			15.4215	3.96871	Arizona LaserChron
15JLS041-74	16758.8	212.022	-41.2536	9.35755e-05	-18.7478	10686.6	0.00329601	21.322	0.00199521		21.2125	4.51551					21.2125	9.03101	Arizona LaserChron
15JLS041-75	15882.5	363.165	-13.8826	0.000828243	-4.71195	1207.52	0.00246167	18.9744	0.0157135		15.8494	3.00364					15.8494	6.00728	Arizona LaserChron
15JLS041-76	20105.2	10.7663	5.6694	0.00074143	1.83308	1348.94	0.002345	22.8385	0.0169307		15.0991	3.44437	1057.38				15.0991	6.88874	Arizona LaserChron
15JLS041-77	24092.5	69.4365	0.7162	0.00307347	0.239817	325.852	0.00242853	17.8095	0.0546552		15.6363	2.78138	218.27	753.315			15.6363	5.56277	Arizona LaserChron
15JLS041-78	17857.9	50.5882	0.332902	0.0085808	0.10083	121.661	0.00219671	34.9267	0.287083		14.1454	4.9351	97.5424	113.621	3630.49	1193.95	14.1454	9.87019	Arizona LaserChron
15JLS041-79	13281.5	22.3127	2.04965	0.00112029	0.714276	892.97	0.00252747	24.7434	0.0277091		16.2726	4.02131	547.282				16.2726	8.04263	Arizona LaserChron
15JLS041-80	20105.4	331.683	1.40138	0.00327862	0.194028	315.803	0.00100417	81.8702	0.259245		6.47007	5.2944	180.061	575.755			6.47007	10.5888	Arizona LaserChron	extremely high error
15JLS041-81	228301	32.644	0.0332626	0.0283095	0.0107366	35.4529	0.00234105	3.02344	0.0852803		15.0737	0.455212	10.8437	3.82397	-852.461	1039.66	15.0737	0.910424	Arizona LaserChron
15JLS041-82	34991.3	389.418	0.135979	0.0232281	0.0524003	44.5345	0.00279486	11.3972	0.255919		17.9917	2.04769	51.8592	22.5191	2176.59	791.321	17.9917	4.09539	Arizona LaserChron
15JLS041-83	11577.7	14.961	1.17778	0.00491288	0.333934	206.998	0.00205635	37.6399	0.181838		13.2425	4.97935	292.565	582.695			13.2425	9.95869	Arizona LaserChron
15JLS041-84	16905.2	51.1523	0.50091	0.00520348	0.136734	197.55	0.00197978	45.7526	0.2316		12.7499	5.82763	130.131	245.984			12.7499	11.6553	Arizona LaserChron
15JLS041-85	31098	373.611	0.431604	0.0117027	0.204768	597.678	0.00344092	591.538	0.989727		22.1435	130.781	189.153		4023.02		22.1435	261.561	Arizona LaserChron	extrmely high error
15JLS041-86	36684.1	2.91696	1.07919	0.00198951	0.339535	502.888	0.00228184	15.9145	0.0316463		14.6929	2.33564	296.819				14.6929	4.67129	Arizona LaserChron
15JLS041-87	26017.7	296.979	0.237291	0.0207165	0.072931	62.5044	0.0022291	39.7083	0.635288		14.3537	5.69326	71.477	43.1661	3101.88	828.832	14.3537	11.3865	Arizona LaserChron
15JLS041-88	37433.5	887.216	0.188311	0.0147569	0.0974232	69.0773	0.0037522	13.4005	0.193993		24.143	3.22923	94.395	62.3446	2727.45	918.046	24.143	6.45847	Arizona LaserChron	high 204Pb
15JLS041-89	20750.4	398.309	0.258656	0.0121336	0.100827	88.5969	0.00282717	32.5125	0.366972		18.1994	5.90874	97.5391	82.5772	3238.53	1124.61	18.1994	11.8175	Arizona LaserChron
15JLS041-90	22195.2	3.34695	3.25615	0.000760018	1.03241	1315.85	0.00229958	15.7833	0.0119947		14.807	2.33436	720.134				14.807	4.66872	Arizona LaserChron
15JLS041-91	19808.6	449.549	0.023744	0.00221922	0.00370003	451.805	0.00113019	32.8542	0.0727177		7.28155	2.39095	3.75002	16.9131	-1945.22	0	7.28155	4.7819	Arizona LaserChron
15JLS041-92	279856	30.6158	0.0464067	0.0350783	0.0149164	28.5446	0.00233121	1.45174	0.0508587		15.0104	0.217659	15.034	4.25979	18.8255	696.926	15.0104	0.435318	Arizona LaserChron
15JLS041-93	50485.9	427.041	0.261922	0.0105141	0.0655225	96.7097	0.00181433	17.5138	0.181097		11.6853	2.04469	64.4416	60.4562	3258.3		11.6853	4.08938	Arizona LaserChron
15JLS041-94	25325.9	8.28036	0.93557	0.0012861	0.323065	777.84	0.00250445	21.381	0.0274877		16.1245	3.44328	284.257				16.1245	6.88656	Arizona LaserChron
15JLS041-95	17377.1	204.807	-1.26162	0.00289325	-0.23364	356.575	0.00134313	87.659	0.245836		8.65258	7.57968	-270.197				8.65258	15.1594	Arizona LaserChron	extremely high error
15JLS041-96	39576.2	1406.52	0.647154	0.0440725	0.276815	74.0718	0.00310228	70.511	0.951928		19.9676	14.0576	248.128	164.483			19.9676	28.1152	Arizona LaserChron	high 204Pb; extremely high error
15JLS041-97	14956.6	34.7683	-4.13607	0.000771172	-1.38132	1296.84	0.00242217	16.7303	0.0129009		15.5954	2.60602					15.5954	5.21204	Arizona LaserChron
15JLS041-98	80216.3	2.41789	-1.75827	0.000284091	-0.586519	3520.01	0.00241932	5.40214	0.0015347		15.5771	0.840483	-896.729				15.5771	1.68097	Arizona LaserChron
15JLS041-99	22273.9	73.1739	7.36664	0.000331171	2.61817	3019.65	0.00257767	20.155	0.00667462		16.5954	3.3405	1305.75				16.5954	6.681	Arizona LaserChron
15JLS041-100	32727.5	99.6411	0.188226	0.0128185	0.0575099	79.3652	0.00221596	14.5909	0.183844		14.2692	2.07969	56.7772	43.8519	2726.72	863.581	14.2692	4.15938	Arizona LaserChron
15JLS041-101	380502	170.611	0.0446255	0.0774046	0.0142408	13.0002	0.00231446	1.44926	0.11148		14.9028	0.215731	14.3579	1.85342	-76.0319	317.075	14.9028	0.431461	Arizona LaserChron
15JLS041-102	129771	29.6848	0.0591669	0.0321355	0.0171195	31.8161	0.00209851	6.62727	0.208299		13.5137	0.89465	17.2357	5.43751	573.262	692.36	13.5137	1.7893	Arizona LaserChron
15JLS041-103	34282.1	10.5338	0.248991	0.00321718	0.0756072	311.315	0.0022023	17.3422	0.0557064		14.1814	2.45666	74.0065	225.85	3178.35	312.643	14.1814	4.91332	Arizona LaserChron
15JLS041-104	34894.3	763.613	0.0474717	0.0043174	0.012022	233.77	0.00183672	31.6224	0.135272		11.8294	3.7373	12.1342	28.2045	73.0389	0	11.8294	7.4746	Arizona LaserChron	high 204Pb
15JLS041-105	9820.69	43.0584	1.28549	0.00281795	0.403253	355.704	0.00227514	24.3876	0.0685614		14.6498	3.56868	344.005				14.6498	7.13736	Arizona LaserChron
15JLS041-106	217561	169.768	0.0427299	0.0286674	0.0137429	35.0241	0.00233262	3.14175	0.0897026		15.0195	0.471326	13.8592	4.82113	-183.3	894.44	15.0195	0.942652	Arizona LaserChron
15JLS041-107	52857.3	1495.7	0.0454893	0.00317979	0.0143198	316.494	0.0022831	35.5908	0.112454		14.701	5.22626	14.4369	45.3988			14.701	10.4525	Arizona LaserChron	high 204Pb
15JLS041-108	59387.6	1317.7	0.842794	0.0040816	0.169361	250.017	0.00145744	49.8251	0.199287		9.38841	4.67438	158.864	385.14			9.38841	9.34876	Arizona LaserChron	high 204Pb
15JLS041-109	37767.5	32.3618	0.135755	0.00814942	0.0427507	123.076	0.00228396	9.50311	0.0772136		14.7065	1.39599	42.5061	51.2783	2173.71	318.855	14.7065	2.79197	Arizona LaserChron
15JLS041-110	86263.8	9.27835	0.0955869	0.00886836	0.0294942	112.886	0.00223788	5.32265	0.0471507		14.4102	0.766148	29.5148	32.8499	1539.65	29.7941	14.4102	1.5323	Arizona LaserChron
15JLS041-111	34550.5	13.3661	0.246989	0.00511841	0.0815146	195.899	0.00239363	14.3451	0.0732271		15.4119	2.20821	79.5679	151.026	3165.55	641.845	15.4119	4.41642	Arizona LaserChron
15JLS041-112	20100.3	15.4375	-1.3429	0.00130242	-0.4191	768.02	0.00226347	18.2209	0.0237245		14.5748	2.65265	-551.532				14.5748	5.3053	Arizona LaserChron
15JLS041-113	13334.1	19.0862	-1.37878	0.00282857	-0.419685	353.983	0.00220763	17.8045	0.0502977		14.2156	2.52824	-552.555				14.2156	5.05648	Arizona LaserChron
15JLS041-114	35652.5	26.5812	-0.153296	0.00471401	-0.0470239	212.675	0.00222478	15.1654	0.0713079		14.3259	2.17017	-48.9064	-106.951			14.3259	4.34034	Arizona LaserChron
15JLS041-115	23934.6	238.11	0.740926	0.00316549	0.201396	316.151	0.0019714	12.4234	0.0392956		12.696	1.57571	186.307	599.195			12.696	3.15142	Arizona LaserChron
15JLS041-116	260803	9.78361	0.035124	0.01824	0.0114259	54.8711	0.00235932	2.25578	0.0411106		15.1913	0.342278	11.5359	6.29415	-698.795	1628.92	15.1913	0.684556	Arizona LaserChron
15JLS041-117	20841.7	2.54336	-0.225641	0.00318106	-0.0683604	314.974	0.00219728	19.6452	0.0623709		14.1491	2.77656	-71.8985	-238.989			14.1491	5.55312	Arizona LaserChron
15JLS041-118	58651.1	7.50615	0.0939919	0.0153612	0.0295669	65.4348	0.00228147	6.61792	0.101138		14.6905	0.9711	29.5865	19.0827	1507.94	1406.59	14.6905	1.9422	Arizona LaserChron
15JLS041-119	25833.2	41.1579	-13.7815	6.17021e-05	-4.54533	16206.9	0.00239204	13.305	0.000820947		15.4017	2.04675					15.4017	4.0935	Arizona LaserChron
15JLS041-120	102227	1127.53	0.0899665	0.0126611	0.0216719	80.5705	0.00174709	15.9209	0.197603		11.2526	1.78996	21.7702	17.3554	1424.8	1901.65	11.2526	3.57992	Arizona LaserChron	high 204Pb
FC-5Z secondary standard:
FC-5Z_1	640100	66	0.07587	0.0025	1.895	0.1	0.182	0.0068	0.83545		1082.34	37.3098	1078	35	1091	64	1091	64	UC Santa Cruz	reverse discordance
FC-5Z_2	162400	77	0.0764	0.0027	1.925	0.11	0.1852	0.0072	0.60296		1099.88	39.4015	1087	37	1112	72	1112	72	UC Santa Cruz	reverse discordance
FC-5Z_3	513600	65	0.07704	0.0025	1.854	0.098	0.1763	0.0065	0.75955		1050.98	35.8307	1064.7	35	1120	66	1120	66	UC Santa Cruz
FC-5Z_4	184700	11	0.0761	0.0027	1.874	0.1	0.181	0.007	0.66586		1076.85	38.4386	1069	36	1091	69	1091	69	UC Santa Cruz
FC-5Z_5	83200	54	0.0755	0.0029	1.953	0.11	0.1899	0.0075	0.56237		1125.56	40.8869	1101	38	1078	79	1078	79	UC Santa Cruz	reverse discordance
FC-5Z_6	97100	69	0.0766	0.0029	1.965	0.11	0.1853	0.0071	0.49418		1100.43	38.8511	1106	36	1101	76	1101	76	UC Santa Cruz	reverse discordance
FC-5Z_7	69500	17	0.0758	0.0029	1.926	0.11	0.1845	0.0072	0.51394		1096.05	39.424	1089	36	1085	75	1085	75	UC Santa Cruz	reverse discordance; low 206/204
FC-5Z_8	-2	170																	UC Santa Cruz
FC-5Z_9	307600	70	0.07585	0.0025	1.928	0.1	0.1866	0.0071	0.80055		1107.54	38.81	1089	36	1086	67	1086	67	UC Santa Cruz	reverse discordance
FC-5Z_10	631000	35	0.07586	0.0025	1.972	0.1	0.1885	0.0069	0.75341		1117.92	37.6586	1105.7	35	1094	64	1094	64	UC Santa Cruz	reverse discordance
FC-5Z_11	173100	26	0.0756	0.0026	1.931	0.1	0.1881	0.0073	0.27055		1115.74	39.8546	1092	36	1084	73	1084	73	UC Santa Cruz	reverse discordance
FC-5Z_12	105300	33	0.0764	0.0028	1.902	0.11	0.1844	0.0071	0.58259		1095.5	38.8797	1083	36	1098	75	1098	75	UC Santa Cruz	reverse discordance; low 206/204
FC-5Z_13	276500	-9	0.0757	0.0026	1.958	0.11	0.1896	0.0071	0.72321		1123.93	38.7156	1099	36	1087	66	1087	66	UC Santa Cruz	reverse discordance
FC-5Z_14	151900	28	0.0775	0.0028	1.94	0.11	0.1834	0.0071	0.042447		1090.02	38.9113	1092	37	1122	72	1122	72	UC Santa Cruz	low 206/204
FC-5Z_15	159200	-19	0.0748	0.0026	1.923	0.11	0.1856	0.0071	0.65224		1102.07	38.8416	1091	35	1064	72	1064	72	UC Santa Cruz	reverse discordance; low 206/204
FC-5Z_16	282400	-18	0.07587	0.0026	1.968	0.1	0.1878	0.007	0.64753		1114.1	38.2262	1103	36	1091	66	1091	66	UC Santa Cruz	reverse discordance
FC-5Z_17	199700	14	0.0755	0.0026	1.941	0.11	0.1861	0.007	0.10277		1104.81	38.279	1092	37	1073	70	1073	70	UC Santa Cruz	reverse discordance
FC-5Z_18	139000	26	0.0775	0.0027	1.957	0.11	0.1807	0.0069	0.71926		1075.2	37.8988	1103	37	1130	68	1130	68	UC Santa Cruz
FC-5Z_19	81400	61	0.0765	0.003	1.989	0.11	0.1845	0.0071	0.51065		1096.05	38.8766	1113	38	1107	75	1107	75	UC Santa Cruz	reverse discordance
FC-5Z_20	61800	55	0.0755	0.0029	1.96	0.11	0.1866	0.0074	0.45692		1107.54	40.45	1099	38	1072	77	1072	77	UC Santa Cruz	reverse discordance
FC-5Z_21	169200	78	0.0759	0.0026	1.925	0.11	0.1833	0.0069	0.63127		1089.47	37.8183	1089	37	1099	69	1099	69	UC Santa Cruz	reverse discordance
FC-5Z_22	143500	14	0.0754	0.0027	1.935	0.11	0.1857	0.0071	0.36083		1102.62	38.8384	1097	37	1073	73	1073	73	UC Santa Cruz	reverse discordance; low 206/204
FC-5Z_23	142500	-21	0.0756	0.0027	1.928	0.11	0.1844	0.007	0.61315		1095.5	38.332	1091	37	1081	70	1081	70	UC Santa Cruz	reverse discordance
FC-5Z_24	150500	10	0.0771	0.0028	1.945	0.11	0.1807	0.0069	0.26356		1075.2	37.8988	1094	37	1115	70	1115	70	UC Santa Cruz	low 206/204
FC-5Z_25	140600	-13	0.0753	0.0027	1.946	0.11	0.1862	0.007	0.64229		1105.35	38.2759	1096	36	1072	72	1072	72	UC Santa Cruz	reverse discordance
FC-5Z_26	59400	40	0.076	0.0031	1.883	0.11	0.1813	0.0075	0.21769		1078.49	41.1741	1074	38	1080	84	1080	84	UC Santa Cruz	reverse discordance
FC-5Z_27	71900	64	0.0753	0.0029	1.984	0.11	0.187	0.0072	0.4408		1109.73	39.3439	1110	38	1089	80	1089	80	UC Santa Cruz	reverse discordance
FC-5Z_28	209400	20	0.0756	0.0026	1.945	0.11	0.1855	0.007	0.74444		1101.52	38.2977	1096	35	1081	68	1081	68	UC Santa Cruz	reverse discordance; low 206/204
FC-5Z_29	67200	-17	0.0767	0.003	1.99	0.11	0.1887	0.0076	0.22753		1119.01	41.4724	1115	38	1130	76	1130	76	UC Santa Cruz	reverse discordance
FC-5Z_30	356300	10	0.07702	0.0026	1.975	0.11	0.1862	0.007	0.79387		1105.35	38.2758	1108	35	1127	67	1127	67	UC Santa Cruz	low 206/204
FC-5Z_31	88800	-7	0.0762	0.0028	1.929	0.11	0.1869	0.0073	0.57056		1109.18	39.8936	1093	36	1094	74	1094	74	UC Santa Cruz	reverse discordance
FC-5Z_32	60400	43	0.0839	0.0034	2.11	0.12	0.1849	0.0073	0.041654		1098.24	39.9587	1155	40	1278	79	1278	79	UC Santa Cruz
FC-5Z_33	223900	38	0.07656	0.0026	1.992	0.11	0.1891	0.0072	0.74058		1121.2	39.2768	1110	37	1106	68	1106	68	UC Santa Cruz	reverse discordance; low 206/204
FC-5Z_34	91	75																	UC Santa Cruz
FC-5Z_35	72200	25	0.0762	0.0028	1.958	0.11	0.1856	0.0072	0.48797		1102.07	39.3887	1101	38	1094	75	1094	75	UC Santa Cruz	reverse discordance
FC-5Z_36	171700	49	0.0773	0.0028	2.003	0.11	0.1892	0.0072	0.56425		1121.74	39.2737	1117	37	1129	71	1129	71	UC Santa Cruz	reverse discordance
FC-5Z_37	615000	53	0.07595	0.0025	1.98	0.1	0.1915	0.007	0.71019		1134.28	38.1116	1108.5	36	1092	66	1092	66	UC Santa Cruz	reverse discordance
FC-5Z_38	169100	20	0.0772	0.0027	1.995	0.11	0.1881	0.0072	0.5939		1115.74	39.3088	1113	37	1124	72	1124	72	UC Santa Cruz	reverse discordance
FC-5Z_39	273500	32	0.0746	0.0026	1.918	0.11	0.1876	0.0074	0.78018		1113.01	40.417	1086	37	1052	69	1052	69	UC Santa Cruz	reverse discordance
FC-5Z_40	224900	8	0.0771	0.0027	2.002	0.11	0.1852	0.0069	0.65832		1099.88	37.7598	1115	37	1126	68	1126	68	UC Santa Cruz	low 206/204
FC-5Z_41	171700	-17	0.0757	0.0026	1.929	0.1	0.1796	0.0068	0.59724		1069.15	37.3831	1089	36	1090	70	1090	70	UC Santa Cruz
FC-5Z_42	181600	50	0.0772	0.0027	2.027	0.11	0.1841	0.0069	0.62197		1093.85	37.7937	1125	38	1127	69	1127	69	UC Santa Cruz
FC-5Z_43	277500	8	0.07663	0.0026	1.958	0.1	0.1792	0.0067	0.7054		1066.95	36.8454	1102	36	1108	67	1108	67	UC Santa Cruz
FC-5Z_44	422500	0	0.07602	0.0025	1.946	0.1	0.1828	0.0067	0.6546		1086.73	36.7371	1095.8	35	1098	66	1098	66	UC Santa Cruz	reverse discordance; low 206/204
FC-5Z_45	188300	-9	0.0762	0.0026	1.985	0.11	0.1919	0.0074	0.71141		1136.46	40.2764	1110	37	1104	69	1104	69	UC Santa Cruz	reverse discordance
FC-5Z_46	283400	10	0.07707	0.0026	1.968	0.11	0.1866	0.0069	0.70222		1107.54	37.7168	1103	36	1122	67	1122	67	UC Santa Cruz
FC-5Z_48	807000	33	0.07571	0.0025	1.934	0.1	0.1871	0.0069	0.79879		1110.27	37.7014	1092.1	35	1086	66	1086	66	UC Santa Cruz	reverse discordance
FC-5Z_49	97500	34	0.0779	0.0042	1.98	0.14	0.1856	0.0073	0.14906		1102.07	39.9362	1089	26	1104	71	1104	71	UC Santa Cruz	reverse discordance
FC-5Z_50	218500	14	0.0756	0.0026	1.924	0.11	0.1884	0.0071	0.62924		1117.38	38.7533	1092	36	1078	71	1078	71	UC Santa Cruz	reverse discordance; low 206/204
FC-5Z_51	223500	-10	0.07611	0.0026	1.91	0.1	0.1851	0.0071	0.73467		1099.33	38.8575	1083	36	1098	70	1098	70	UC Santa Cruz	reverse discordance
FC-5Z_52	184000	20	0.0772	0.003	2.03	0.22	0.192	0.015	-0.0097821		1136.99	81.6322	1089	17	1110	95	1110	95	UC Santa Cruz	reverse discordance; high 207 corr; low 206/204
FC-5Z_53	273000	-5	0.0768	0.0026	1.962	0.11	0.191	0.0072	0.70312		1131.56	39.2164	1102	36	1108	69	1108	69	UC Santa Cruz	reverse discordance
FC-5Z_54	74950	8	0.0755	0.0028	1.873	0.1	0.1858	0.0072	0.57437		1103.16	39.3823	1071	37	1079	75	1079	75	UC Santa Cruz	reverse discordance
FC-5Z_55	84200	29	0.0765	0.0028	1.977	0.11	0.1895	0.0073	0.56665		1123.38	39.8094	1105	38	1103	74	1103	74	UC Santa Cruz	reverse discordance
FC-5Z_56	73300	4	0.0759	0.0029	1.957	0.11	0.1882	0.0073	0.44346		1116.28	39.8515	1107	38	1081	75	1081	75	UC Santa Cruz	reverse discordance
FC-5Z_57	627000	2	0.0764	0.0025	2	0.11	0.1852	0.0069	-0.047916		1099.88	37.7598	1114	37	1101	66	1101	66	UC Santa Cruz	reverse discordance
FC-5Z_58	205800	18	0.0748	0.0026	1.923	0.1	0.1839	0.0071	0.62044		1092.76	38.8955	1087	36	1066	69	1066	69	UC Santa Cruz	reverse discordance
FC-5Z_59	243700	9	0.0759	0.0026	1.921	0.1	0.1815	0.0067	0.58151		1079.59	36.7762	1088	35	1092	69	1092	69	UC Santa Cruz
FC-5Z_60	103100	6	0.077	0.0027	1.98	0.11	0.1859	0.0072	0.69878		1103.71	39.3791	1107	37	1115	71	1115	71	UC Santa Cruz	reverse discordance
FC-5Z_61	96600	23	0.0739	0.0027	1.961	0.11	0.1934	0.0076	0.66808		1144.63	41.3148	1103	38	1052	72	1052	72	UC Santa Cruz	reverse discordance
FC-5Z_62	172600	17	0.0765	0.0026	1.982	0.11	0.1907	0.0073	0.68298		1129.93	39.7707	1110	35	1099	69	1099	69	UC Santa Cruz	reverse discordance
FC-5Z_63	114200	25	0.0767	0.0028	1.991	0.11	0.188	0.0072	0.57064		1115.19	39.3119	1111	37	1121	69	1121	69	UC Santa Cruz	reverse discordance; low 206/204
FC-5Z_64	95200	-6	0.0756	0.0028	1.927	0.11	0.1876	0.0072	0.56033		1113.01	39.3247	1091	39	1077	75	1077	75	UC Santa Cruz	reverse discordance
FC-5Z_65	88000	2	0.0776	0.0029	1.917	0.11	0.1828	0.0071	0.51899		1086.73	38.9304	1089	37	1138	74	1138	74	UC Santa Cruz	low 206/204
FC-5Z_66	290200	-11	0.0759	0.0026	1.941	0.1	0.1839	0.0069	0.29029		1092.76	37.7998	1093	36	1086	68	1086	68	UC Santa Cruz	reverse discordance
FC-5Z_67	104700	46	0.078	0.0028	1.949	0.11	0.1802	0.0072	0.72024		1072.45	39.5627	1096	38	1139	71	1139	71	UC Santa Cruz	low 206/204
FC-5Z_68	90500	-21	0.0774	0.0029	1.966	0.11	0.1835	0.0077	-0.036431		1090.57	42.1961	1103	38	1119	78	1119	78	UC Santa Cruz
FC-5Z_69	79400	26	0.0754	0.0029	1.96	0.11	0.1851	0.0072	0.486		1099.33	39.4048	1100	37	1085	73	1085	73	UC Santa Cruz	reverse discordance
FC-5Z_70	85710	10	0.0768	0.0028	1.941	0.11	0.1837	0.007	0.60441		1091.66	38.3539	1096	36	1103	73	1103	73	UC Santa Cruz	reverse discordance
FC-5Z_71	94800	6	0.075	0.0027	1.935	0.11	0.1878	0.0077	0.74268		1114.1	42.0487	1089	38	1071	74	1071	74	UC Santa Cruz	reverse discordance; low 206/204
FC-5Z_72	236600	-8	0.0768	0.0026	1.988	0.11	0.1902	0.0074	0.72456		1127.2	40.3318	1112	37	1114	69	1114	69	UC Santa Cruz	reverse discordance; low 206/204
FC-5Z_73	593000	-19	0.07545	0.0025	1.938	0.1	0.1848	0.0069	0.74778		1097.69	37.7721	1093	35	1085	67	1085	67	UC Santa Cruz	reverse discordance
FC-5Z_74	167800	45	0.0762	0.0027	1.972	0.11	0.1875	0.0072	0.7255		1112.46	39.3279	1108	39	1104	72	1104	72	UC Santa Cruz	reverse discordance
FC-5Z_75	406900	26	0.07623	0.0025	1.969	0.1	0.1862	0.0068	0.69096		1105.35	37.1823	1105.6	36	1099	66	1099	66	UC Santa Cruz	reverse discordance; low 206/204
FC-5Z_76	273800	-11	0.0769	0.0026	1.925	0.1	0.1839	0.0072	0.73657		1092.76	39.4432	1090	36	1120	71	1120	71	UC Santa Cruz	low 206/204
FC-5Z_77	140600	-2	0.0755	0.0027	1.892	0.11	0.1823	0.007	0.71899		1083.98	38.3977	1076	38	1084	72	1084	72	UC Santa Cruz	reverse discordance
FC-5Z_78	118700	37	0.0757	0.0027	1.901	0.11	0.1822	0.0071	0.66244		1083.43	38.9494	1080	37	1093	70	1093	70	UC Santa Cruz	reverse discordance
FC-5Z_79	430800	25	0.07656	0.0026	1.936	0.1	0.1847	0.0068	0.63524		1097.14	37.2277	1093	35	1110	64	1110	64	UC Santa Cruz
FC-5Z_80	265000	29	0.0762	0.0026	2.005	0.11	0.191	0.0073	0.74622		1131.56	39.7611	1116	36	1102	70	1102	70	UC Santa Cruz	reverse discordance
FC-5Z_81	51820	0	0.0766	0.003	1.889	0.11	0.186	0.0074	0.57656		1104.26	40.4697	1080	40	1096	79	1096	79	UC Santa Cruz	reverse discordance
FC-5Z_82	157300	52	0.0761	0.0027	1.842	0.1	0.1826	0.0071	0.68788		1085.63	38.9367	1061	36	1093	71	1093	71	UC Santa Cruz	reverse discordance
FC-5Z_83	157700	25	0.0763	0.0027	1.885	0.1	0.1847	0.0072	0.66098		1097.14	39.4175	1076	37	1106	70	1106	70	UC Santa Cruz	reverse discordance
FC-5Z_84	102600	7	0.0759	0.0028	1.904	0.11	0.1843	0.007	0.57508		1094.95	38.3352	1082	36	1082	75	1082	75	UC Santa Cruz	reverse discordance; low 206/204
FC-5Z_85	125800	-19	0.0747	0.0027	1.882	0.1	0.1823	0.0073	0.64802		1083.98	443321931142	1072	37	1060	70	1060	70	UC Santa Cruz	reverse discordance
FC-5Z_86	70700	10	0.0792	0.0031	1.92	0.11	0.1751	0.0074	0.59788		1044.35	40.8322	1090	40	1178	76	1178	76	UC Santa Cruz	low 206/204
FC-5Z_87	167200	-3	0.0775	0.0027	2.036	0.11	0.1867	0.0073	0.68799		1108.09	39.9	1126	38	1127	71	1127	71	UC Santa Cruz
FC-5Z_88	116000	43	0.0763	0.0028	1.988	0.11	0.1828	0.0073	0.7304		1086.73	4269833251288	1107	38	1117	70	1117	70	UC Santa Cruz
FC-5Z_89	253500	47	0.07617	0.0026	2.009	0.11	0.1885	0.0072	0.72528		1117.92	39.296	1119	36	1096	67	1096	67	UC Santa Cruz	reverse discordance
FC-5Z_90	123200	39	0.0768	0.0028	1.927	0.11	0.1802	0.0069	-0.088792		1072.45	37.9143	1087	38	1102	74	1102	74	UC Santa Cruz
FC-5Z_91	267800	21	0.07656	0.0026	1.946	0.11	0.1834	0.0073	0.81492		1090.02	4074134958849	1097	36	1111	68	1111	68	UC Santa Cruz	low 206/204
FC-5Z_92	114200	-21	0.0767	0.0028	1.945	0.11	0.1848	0.0079	0.80252		1097.69	43.2462	1095	40	1104	73	1104	73	UC Santa Cruz	reverse discordance
FC-5Z_93	64000	28	0.0762	0.003	1.992	0.11	0.1855	0.0074	0.54855		1101.52	40.4861	1112	39	1110	80	1110	80	UC Santa Cruz	reverse discordance
FC-5Z_94	140900	12	0.0761	0.0027	1.912	0.11	0.1824	0.0072	0.68534		1084.53	39.4916	1085	38	1111	68	1111	68	UC Santa Cruz	low 206/204
FC-5Z_95	105400	-10	0.0768	0.0028	1.963	0.11	0.1837	0.0072	0.59597		1091.66	39.4497	1099	38	1113	74	1113	74	UC Santa Cruz
FC-5Z_96	387000	41	0.07486	0.0025	1.907	0.1	0.1836	0.007	0.72502		1091.11	38.357	1084	36	1062	69	1062	69	UC Santa Cruz	reverse discordance
FC-5Z_97	75900	32	0.0756	0.003	1.944	0.12	0.1873	0.0078	0.68848		1111.37	42.6121	1096	39	1072	81	1072	81	UC Santa Cruz	reverse discordance
FC-5Z_98	91200	48	0.0822	0.0031	2.253	0.14	0.1984	0.008	0.61061		1171.77	43.3146	1192	40	1242	71	1242	71	UC Santa Cruz
FC-5Z_99	115200	54	0.0754	0.0027	1.876	0.11	0.1845	0.0071	0.71161		1096.05	38.8764	1073	37	1076	74	1076	74	UC Santa Cruz	reverse discordance
FC-5Z_100	220300	34	0.0757	0.0026	1.935	0.11	0.1882	0.0073	0.77146		1116.28	39.8514	1095	37	1088	68	1088	68	UC Santa Cruz	reverse discordance
FC-5Z_101	78900	73	0.0777	0.0029	1.942	0.11	0.1814	0.0071	0.69825		1079.04	38.9751	1093	39	1130	74	1130	74	UC Santa Cruz
FC-5Z_102	237400	73	0.07685	0.0026	1.962	0.11	0.1843	0.007	0.74377		1094.95	38.3351	1100	37	1117	67	1117	67	UC Santa Cruz	low 206/204
FC-5Z_103	117000	-20	0.0758	0.0028	1.952	0.11	0.1854	0.0073	0.66302		1100.98	39.9423	1100	37	1084	72	1084	72	UC Santa Cruz	reverse discordance
FC-5Z_104	94800	20	0.0759	0.0028	1.973	0.11	0.1858	0.0073	0.56807		1103.16	39.9293	1103	38	1082	75	1082	75	UC Santa Cruz	reverse discordance
FC-5Z_105	127000	45	0.0753	0.0027	1.929	0.11	0.1845	0.0075	0.69962		1096.05	41.0666	1088	37	1082	73	1082	73	UC Santa Cruz	reverse discordance
FC-5Z_106	166300	40	0.077	0.0027	1.883	0.1	0.1752	0.0068	0.69294		1044.91	37.5184	1075	36	1116	69	1116	69	UC Santa Cruz
FC-5Z_107	224000	30	0.0752	0.0026	1.95	0.11	0.1841	0.0073	0.74221		1093.86	39.9846	1100	36	1066	68	1066	68	UC Santa Cruz	reverse discordance
FC-5Z_108	64200	33	0.0761	0.0029	1.896	0.11	0.1766	0.0068	0.63005		1052.63	37.4753	1075	38	1107	77	1107	77	UC Santa Cruz
MADDER U, Th, and Pb sensitivity standard:
Madder	871000	43	0.05689	0.0019	0.6388	0.034	0.0796	0.0029	0.77867		495.253	17.3795	501.7	21	486	73	495.253	17.3795	UC Santa Cruz
Madder_36	841000	-9	0.05752	0.0019	0.64	0.034	0.0817	0.003	0.79249		507.828	17.9446	501.7	21	517	77	507.828	17.9446	UC Santa Cruz
Madder_37	830000	20	0.05727	0.0019	0.6491	0.034	0.0816	0.003	0.82443		507.23	17.9462	507.5	21	501	71	507.23	17.9462	UC Santa Cruz
Madder1	1474000	89	0.05696	0.0019	0.6851	0.036	0.0876	0.0033	0.81457		543.03	19.6341	529.5	22	493	76	543.03	19.6341	UC Santa Cruz
Madder10	1167000	93	0.05757	0.0019	0.6455	0.034	0.0819	0.0031	0.85002		509.025	18.5394	505.9	21	514	72	509.025	18.5394	UC Santa Cruz
Madder11	1200000	40	0.05765	0.0019	0.6694	0.035	0.08432	0.0031	0.74233		523.483	18.4988	520.5	22	515	73	523.483	18.4988	UC Santa Cruz
Madder12	1135000	58	0.05736	0.0019	0.6587	0.035	0.0837	0.0031	0.7376		519.782	18.5092	514	22	502	72	519.782	18.5092	UC Santa Cruz
Madder13	1201000	21	0.05779	0.0019	0.659	0.035	0.0837	0.0032	0.83162		519.782	19.1063	514.8	21	524	72	519.782	19.1063	UC Santa Cruz
Madder14	1138000	35	0.05709	0.0018	0.662	0.035	0.0837	0.0031	0.83555		519.782	18.5092	515.4	21	493	72	519.782	18.5092	UC Santa Cruz
Madder15	1147000	83	0.05766	0.0019	0.6788	0.036	0.0847	0.0031	0.85386		525.751	18.4925	525.5	22	516	72	525.751	18.4925	UC Santa Cruz
Madder16	1114000	-4	0.0574	0.0019	0.66	0.035	0.08285	0.003	0.74543		514.704	17.9259	515.3	21	503	72	514.704	17.9259	UC Santa Cruz
Madder17	1088000	37	0.05731	0.0019	0.6672	0.035	0.08391	0.0031	0.77839		521.036	18.5057	519.8	21	501	71	521.036	18.5057	UC Santa Cruz
Madder18	1055000	19	0.05721	0.0019	0.6665	0.035	0.08455	0.0031	0.81362		524.856	18.495	519.3	22	499	70	524.856	18.495	UC Santa Cruz
Madder19	1040000	40	0.05749	0.0019	0.6678	0.035	0.0842	0.0031	0.87501		522.767	18.5009	519.6	22	513	73	522.767	18.5009	UC Santa Cruz
Madder2	1445000	64	0.05724	0.0018	0.6888	0.036	0.0872	0.0032	0.92691		540.65	19.046	531.7	22	502	71	540.65	19.046	UC Santa Cruz
Madder20	1112000	35	0.05715	0.0018	0.6776	0.036	0.0859	0.0032	0.83849		532.906	19.0683	525.5	22	496	72	532.906	19.0683	UC Santa Cruz
Madder21	1057000	66	0.05728	0.0019	0.6597	0.034	0.08101	0.0029	0.73401		503.699	17.3573	514.1	21	501	71	503.699	17.3573	UC Santa Cruz
Madder22	1030000	35	0.05782	0.0019	0.6477	0.034	0.08178	0.0029	0.64278		508.307	17.3452	506.7	21	524	70	508.307	17.3452	UC Santa Cruz
Madder23	710000	10	0.05723	0.0019	0.7228	0.038	0.09288	0.0033	0.57417		574.375	19.5412	552.4	22	499	73	574.375	19.5412	UC Santa Cruz
Madder24	1081000	10	0.05702	0.0019	0.6616	0.035	0.0852	0.0031	0.7601		528.733	18.4841	515.2	21	495	72	528.733	18.4841	UC Santa Cruz
Madder25	1069000	92	0.05764	0.0019	0.6627	0.035	0.0815	0.003	0.80032		506.631	17.9479	516.3	22	512	72	506.631	17.9479	UC Santa Cruz
Madder26	1007000	78	0.05781	0.0019	0.6586	0.035	0.0832	0.0031	0.7899		516.796	18.5176	513.3	21	521	72	516.796	18.5176	UC Santa Cruz
Madder27	1011000	2	0.05781	0.0019	0.6656	0.035	0.0843	0.0031	0.74454		523.364	18.4992	518.2	22	519	72	523.364	18.4992	UC Santa Cruz
Madder28	937000	-8	0.05731	0.0019	0.6711	0.035	0.0832	0.0031	0.8083		516.796	18.5176	522.1	22	508	72	516.796	18.5176	UC Santa Cruz
Madder29	1414000	68	0.05716	0.0019	0.6762	0.036	0.0864	0.0032	0.90199		535.886	19.0598	524.7	21	497	73	535.886	19.0598	UC Santa Cruz
Madder3	1213000	33	0.05811	0.0019	0.6641	0.035	0.0839	0.0031	0.8044		520.976	18.5059	517.3	21	534	74	520.976	18.5059	UC Santa Cruz
Madder30	1019000	49	0.05754	0.0019	0.6749	0.035	0.08417	0.0031	0.77399		522.588	18.5014	523.3	21	513	71	522.588	18.5014	UC Santa Cruz
Madder31	958000	26	0.05712	0.0019	0.6855	0.036	0.0881	0.0032	0.75976		546.005	19.0306	530.2	22	501	70	546.005	19.0306	UC Santa Cruz
Madder32	1067000	27	0.05739	0.0019	0.6577	0.035	0.0855	0.0032	0.81848		530.522	19.0752	513.4	21	507	70	530.522	19.0752	UC Santa Cruz
Madder33	995500	1	0.05725	0.0019	0.662	0.036	0.083	0.0031	0.89185		515.601	18.5209	514.8	22	497	73	515.601	18.5209	UC Santa Cruz
Madder34	912000	53	0.05733	0.0019	0.6466	0.034	0.0822	0.0031	0.81259		510.818	18.5344	505.9	21	507	72	510.818	18.5344	UC Santa Cruz
Madder35	856000	46	0.05769	0.0019	0.6655	0.035	0.0832	0.0031	0.79813		516.796	18.5176	517.5	21	515	71	516.796	18.5176	UC Santa Cruz
Madder4	1195000	4	0.05754	0.0019	0.6498	0.034	0.08278	0.003	0.7322		514.286	17.9271	508.1	21	509	71	514.286	17.9271	UC Santa Cruz
Madder5	1217000	39	0.05743	0.0018	0.6689	0.035	0.085	0.0032	0.85875		527.54	19.0838	519.6	21	511	74	527.54	19.0838	UC Santa Cruz
Madder6	1228000	-3	0.05757	0.0019	0.6531	0.035	0.0833	0.0031	0.76977		517.393	18.5159	511.4	20	510	71	517.393	18.5159	UC Santa Cruz
Madder7	1204000	112	0.05715	0.0019	0.6525	0.034	0.0839	0.0031	0.79548		520.976	18.5059	510.8	22	496	72	520.976	18.5059	UC Santa Cruz
Madder8	1209000	60	0.05754	0.0019	0.6543	0.034	0.0832	0.0031	0.81547		516.796	18.5176	511.2	22	515	72	516.796	18.5176	UC Santa Cruz
Madder9	1244000	29	0.05764	0.0019	0.6397	0.034	0.081	0.003	0.82336		503.639	17.956	503	21	515	73	503.639	17.956	UC Santa Cruz
R33 secondary standard:
15JLS029-R33	8.93072e+06	39.4095	0.0550049	1.22087	0.51902	1.00416	0.0684355	0.580898	0.578489		426.723	2.39857	424.497	3.48383	412.401	18.3128	426.723	4.79713	Arizona LaserChron
15JLS029-R33	4.95135e+06	351.019	0.0561523	0.524985	0.531691	2.3191	0.0686737	1.32284	0.57041		428.16	5.47987	432.932	8.17423	458.377	42.2717	428.16	10.9597	Arizona LaserChron
15JLS029-R33 REMOUNT	5.52014e+06	25.6029	0.0552026	2.16354	0.520048	0.581697	0.0683255	0.353181	0.607156		426.06	1.45611	425.184	2.02075	420.416	10.3187	426.06	2.91222	Arizona LaserChron
15JLS029-R33 REMOUNT	987763	83.0464	0.0570184	0.542316	0.51416	1.9596	0.0654007	0.66327	0.338471		408.387	2.62469	421.243	6.75665	492.267	40.6626	408.387	5.24938	Arizona LaserChron
15JLS036B-R33	7.62389e+06	30.1978	0.0554854	0.456693	0.513962	2.89476	0.0671816	1.89342	0.654085		419.153	7.68382	421.11	9.97865	431.814	48.7941	419.153	15.3676	Arizona LaserChron
15JLS037-R33	1.12691e+06	14.3678	0.0574111	0.124848	0.534853	8.19258	0.0675673	1.72127	0.2101		421.483	7.02276	435.025	28.9959	507.34	176.405	421.483	14.0455	Arizona LaserChron
15JLS037-R33	623311	12.6929	0.0499373	0.0375153	0.455903	26.6642	0.0662133	0.669941	0.0251251		413.302	2.68198	381.404	84.9788	192.1	629.737	413.302	5.36397	Arizona LaserChron
15JLS037-R33	579517	30.2937	0.0506465	0.0463989	0.461554	21.5797	0.0660956	1.08869	0.0504495		412.59	4.35108	385.338	69.3038	224.783	503.336	412.59	8.70216	Arizona LaserChron
15JLS037-R33	165126	12.3997	0.0807254	0.00984732	0.732494	101.572	0.0658102	2.10353	0.0207097		410.864	8.37299	558.016	466.28	1214.75	173.784	410.864	16.746	Arizona LaserChron
15JLS037-R33	1.84079e+06	40.4205	0.0544142	0.152166	0.504309	6.60403	0.0672176	0.652092	0.0987415		419.371	2.64763	414.615	22.4838	388.21	147.671	419.371	5.29526	Arizona LaserChron
15JLS041-R33	1.4473e+06	0.704709	0.0542363	0.143864	0.518787	7.04655	0.0693742	1.15645	0.164115		432.384	4.83628	424.341	24.4446	380.851	156.432	432.384	9.67256	Arizona LaserChron
15JLS041-R33	3.38773e+06	7.29349	0.0555267	0.269443	0.521685	3.76529	0.0681405	0.635014	0.168649		424.943	2.61143	426.276	13.108	433.471	82.6802	424.943	5.22286	Arizona LaserChron
15JLS041-R33	273579	21.7457	0.0511509	0.0336493	0.476028	29.7817	0.0674959	1.94244	0.0652226		421.051	7.91732	395.344	97.827	247.632	697.897	421.051	15.8346	Arizona LaserChron
15JLS041-R33	2.99468e+06	8.14955	0.0556515	0.260883	0.518153	3.86983	0.0675274	0.531684	0.137392		421.242	2.16807	423.917	13.4119	438.469	85.3274	421.242	4.33614	Arizona LaserChron
Temora 2 primary standard:
Temora-II_1	102500	64	0.0561	0.0023	0.539	0.031	0.0708	0.0028	0.40894		442.297	16.9156	439.4	21	450	90	442.297	16.9156	UC Santa Cruz	moved
Temora-II_2	29890	34	0.0547	0.0027	0.488	0.031	0.0654	0.0026	0.33579		409.589	15.7855	406	22	382	100	409.589	15.7855	UC Santa Cruz	moved
Temora-II_3	30740	61	0.0543	0.0026	0.492	0.031	0.0656	0.0027	0.30792		410.803	16.3896	406	21	361	100	410.803	16.3896	UC Santa Cruz
Temora-II_4	17230	9	0.053	0.0031	0.479	0.035	0.0651	0.0027	0.34248		407.767	16.3972	395	24	299	120	407.767	16.3972	UC Santa Cruz
Temora-II_5	44940	20	0.0561	0.0025	0.526	0.032	0.0668	0.0026	0.3209		418.084	15.7651	427	21	453	99	418.084	15.7651	UC Santa Cruz
Temora-II_6	40760	8	0.0556	0.0024	0.508	0.029	0.0661	0.0026	0.32096		413.838	15.7753	415.5	20	429	92	413.838	15.7753	UC Santa Cruz
Temora-II_7	73700	39	0.057	0.0022	0.511	0.03	0.0661	0.0026	0.57274		413.838	15.7753	418.7	20	484	85	413.838	15.7753	UC Santa Cruz
Temora-II_8	45850	30	0.0538	0.0024	0.485	0.029	0.0659	0.0026	0.30577		412.624	15.7782	401	20	335	94	412.624	15.7782	UC Santa Cruz
Temora-II_9	67500	18	0.0563	0.0023	0.506	0.03	0.0663	0.0026	0.48175		415.052	15.7724	415	20	448	89	415.052	15.7724	UC Santa Cruz
Temora-II_10	48090	26	0.0559	0.0024	0.539	0.033	0.0705	0.0027	0.40202		440.484	16.3159	438	21	436	96	440.484	16.3159	UC Santa Cruz
Temora-II_11	35400	31	0.0568	0.0027	0.508	0.032	0.0654	0.0026	0.20897		409.589	15.7855	417	21	444	100	409.589	15.7855	UC Santa Cruz
Temora-II_12	69950	30	0.0541	0.0021	0.498	0.028	0.0665	0.0025	0.44009		416.265	15.163	410.4	19	369	86	416.265	15.163	UC Santa Cruz
Temora-II_13	97500	-14	0.0563	0.0021	0.512	0.029	0.0661	0.0026	0.14451		413.838	15.7753	418.6	19	462	85	413.838	15.7753	UC Santa Cruz
Temora-II_14	164400	136	0.06	0.0026	0.547	0.034	0.0667	0.0026	0.66761		417.478	15.7666	442	22	595	87	417.478	15.7666	UC Santa Cruz
Temora-II_15	127200	46	0.0556	0.0021	0.51	0.028	0.0671	0.0026	0.031578		419.903	15.7608	417.7	19	418	83	419.903	15.7608	UC Santa Cruz
Temora-II_16	246700	-3	0.05535	0.002	0.51	0.028	0.0666	0.0026	-0.0010097		416.872	15.768	417.4	19	415	79	416.872	15.768	UC Santa Cruz
Temora-II_17	356000	77	0.05503	0.0019	0.5046	0.027	0.06687	0.0025	0.67463		418.509	15.1578	414.9	18	411	75	418.509	15.1578	UC Santa Cruz
Temora-II_18	43540	-25	0.0561	0.0025	0.499	0.03	0.066	0.0026	0.21612		413.231	15.7768	411	20	443	95	413.231	15.7768	UC Santa Cruz
Temora-II_19	474300	42	0.05488	0.0018	0.5082	0.027	0.06774	0.0025	0.77912		423.782	15.1456	416.9	18	405	75	423.782	15.1456	UC Santa Cruz
Temora-II_20	156000	21	0.0553	0.002	0.504	0.028	0.06681	0.0025	0.54882		418.145	15.1586	413.6	19	419	82	418.145	15.1586	UC Santa Cruz
Temora-II_21	61070	58	0.0559	0.0023	0.504	0.029	0.0658	0.0025	0.47464		412.018	15.1727	414.3	20	440	91	412.018	15.1727	UC Santa Cruz
Temora-II_22	81500	27	0.0563	0.0022	0.508	0.029	0.0662	0.0026	0.5293		414.445	15.7738	416.5	20	464	88	414.445	15.7738	UC Santa Cruz
Temora-II_23	36600	91	0.0553	0.0027	0.505	0.032	0.0679	0.0027	0.23459		424.752	16.3549	413	21	382	100	424.752	16.3549	UC Santa Cruz
Temora-II_24	27590	34	0.0524	0.0026	0.475	0.031	0.0658	0.0026	0.37142		412.017	15.7797	392	21	323	110	412.017	15.7797	UC Santa Cruz
Temora-II_25	37320	-23	0.0566	0.0027	0.499	0.032	0.065	0.0026	0.40202		407.16	15.7913	409	22	469	100	407.16	15.7913	UC Santa Cruz
Temora-II_26	88400	39	0.0553	0.0021	0.512	0.029	0.0679	0.0026	0.59549		424.752	15.7492	418.9	19	420	85	424.752	15.7492	UC Santa Cruz
Temora-II_27	51730	34	0.0545	0.0023	0.494	0.029	0.0663	0.0025	0.32178		415.052	15.1658	406.4	20	380	93	415.052	15.1658	UC Santa Cruz
Temora-II_28	99920	-7	0.0556	0.0021	0.509	0.03	0.0669	0.0026	0.67244		418.691	15.7637	416.1	20	434	86	418.691	15.7637	UC Santa Cruz
Temora-II_29	32440	-3	0.0536	0.0028	0.506	0.034	0.0684	0.0027	0.29769		427.78	16.3474	418	23	335	110	427.78	16.3474	UC Santa Cruz
Temora-II_30	131000	72	0.055	0.0021	0.495	0.027	0.06569	0.0025	0.48475		411.35	15.1743	408.1	19	401	85	411.35	15.1743	UC Santa Cruz
Temora-II_31	60500	-1	0.0541	0.0022	0.502	0.029	0.0673	0.0025	0.45089		421.116	15.1518	413.1	19	364	89	421.116	15.1518	UC Santa Cruz
Temora-II_32	64200	60	0.0565	0.0022	0.515	0.03	0.0659	0.0025	0.40324		412.624	15.1713	422	20	455	87	412.624	15.1713	UC Santa Cruz
Temora-II_33	36560	12	0.0559	0.0027	0.515	0.033	0.0673	0.0027	0.40399		421.116	16.364	422	22	403	100	421.116	16.364	UC Santa Cruz
Temora-II_34	147400	17	0.0544	0.002	0.503	0.028	0.0671	0.0025	0.57416		419.903	15.1546	413.7	19	384	84	419.903	15.1546	UC Santa Cruz
Temora-II_35	40630	53	0.0557	0.0025	0.506	0.031	0.066	0.0026	0.21634		413.231	15.7768	417	21	418	100	413.231	15.7768	UC Santa Cruz
Temora-II_36	40500	-4	0.054	0.0025	0.492	0.031	0.0658	0.0026	0.51408		412.018	15.7797	404	21	354	96	412.018	15.7797	UC Santa Cruz
Temora-II_37	86000	40	0.0556	0.0022	0.52	0.03	0.0675	0.0026	0.53557		422.328	15.755	425.1	20	428	88	422.328	15.755	UC Santa Cruz
Temora-II_38	53300	41	0.055	0.0023	0.517	0.031	0.068	0.0026	0.40111		425.357	15.7477	423	20	405	95	425.357	15.7477	UC Santa Cruz
Temora-II_39	21120	27	0.0549	0.0029	0.492	0.032	0.0646	0.0026	0.15404		404.73	15.7972	409	22	367	110	404.73	15.7972	UC Santa Cruz
Temora-II_40	94800	4	0.0545	0.0021	0.504	0.028	0.0677	0.0026	0.45357		423.54	15.7521	413.2	19	398	88	423.54	15.7521	UC Santa Cruz
Temora-II_41	95300	11	0.0544	0.0021	0.491	0.028	0.0651	0.0025	0.5135		407.767	15.1825	404.5	19	374	86	407.767	15.1825	UC Santa Cruz
Temora-II_42	29850	-3	0.0543	0.0029	0.505	0.033	0.0671	0.0027	0.25923		419.904	16.367	412	22	349	110	419.904	16.367	UC Santa Cruz
Temora-II_43	15270	-19	0.0536	0.0036	0.501	0.04	0.0664	0.0027	0.18707		415.658	16.3776	408	26	350	130	415.658	16.3776	UC Santa Cruz
Temora-II_44	77200	0	0.0558	0.0023	0.526	0.031	0.0682	0.0026	0.46678		426.569	15.7448	429	21	441	84	426.569	15.7448	UC Santa Cruz
Temora-II_45	49800	45	0.056	0.0025	0.515	0.032	0.0657	0.0026	0.43462		411.411	15.7811	421	21	425	96	411.411	15.7811	UC Santa Cruz
Temora-II_46	121700	63	0.0547	0.0019	0.51	0.028	0.0672	0.0026	0.66964		420.51	15.7593	418	19	401	77	420.51	15.7593	UC Santa Cruz
Temora-II_47	278000	31	0.05577	0.002	0.518	0.028	0.06666	0.0025	-0.014796		417.235	15.1607	422.9	19	431	77	417.235	15.1607	UC Santa Cruz
Temora-II_48	315300	-8	0.05551	0.0019	0.5155	0.028	0.06655	0.0025	0.61786		416.568	15.1622	421.7	18	432	75	416.568	15.1622	UC Santa Cruz
Temora-II_49	49230	53	0.0546	0.0024	0.508	0.03	0.0659	0.0025	0.3972		412.624	15.1714	416	20	373	94	412.624	15.1714	UC Santa Cruz
Temora-II_50	138300	50	0.0552	0.002	0.512	0.028	0.0669	0.0025	0.65072		418.691	15.1574	418.7	19	421	76	418.691	15.1574	UC Santa Cruz
Temora-II_51	25700	10	0.0552	0.0029	0.509	0.034	0.0676	0.0026	0.28692		422.934	15.7536	419	24	411	110	422.934	15.7536	UC Santa Cruz
Temora-II_52	32290	28	0.056	0.0028	0.506	0.032	0.0657	0.0025	0.064553		411.411	15.1742	416	21	428	110	411.411	15.1742	UC Santa Cruz
Temora-II_53	30010	26	0.056	0.0028	0.523	0.034	0.0675	0.0027	0.3715		422.328	16.361	426	23	428	110	422.328	16.361	UC Santa Cruz
Temora-II_54	48900	-18	0.0548	0.0023	0.506	0.031	0.0671	0.0026	0.59099		419.904	15.7608	416	20	381	90	419.904	15.7608	UC Santa Cruz
Temora-II_55	35990	70	0.0558	0.0026	0.505	0.031	0.0655	0.0026	0.3472		410.196	15.784	413	21	416	100	410.196	15.784	UC Santa Cruz
Temora-II_56	45400	46	0.0547	0.0024	0.524	0.03	0.0681	0.0027	0.24042		425.963	16.3519	427.4	21	392	95	425.963	16.3519	UC Santa Cruz
Temora-II_57	28190	4	0.0536	0.0028	0.49	0.033	0.0661	0.0026	0.27784		413.838	15.7753	405	22	329	110	413.838	15.7753	UC Santa Cruz
Temora-II_58	27600	31	0.0534	0.0028	0.48	0.033	0.0665	0.0027	0.34086		416.265	16.376	397	23	312	110	416.265	16.376	UC Santa Cruz
Temora-II_59	129000	-24	0.05496	0.0019	0.508	0.028	0.0671	0.0026	0.71841		419.903	15.7607	416.4	19	412	77	419.903	15.7607	UC Santa Cruz
Temora-II_60	31380	5	0.0562	0.0028	0.511	0.032	0.0661	0.0026	0.2774		413.838	15.7753	417	21	437	100	413.838	15.7753	UC Santa Cruz
Temora-II_61	38230	3	0.0537	0.0024	0.488	0.031	0.0665	0.0027	0.3455		416.265	16.376	404	20	336	98	416.265	16.376	UC Santa Cruz
Temora-II_62	456000	20	0.05507	0.0018	0.5053	0.027	0.0669	0.0026	-0.067796		418.691	15.7636	414.8	18	409	74	418.691	15.7636	UC Santa Cruz
Temora-II_63	64230	72	0.0541	0.0022	0.498	0.03	0.0667	0.0026	0.50532		417.478	15.7666	410	20	366	86	417.478	15.7666	UC Santa Cruz
Temora-II_64	45700	-4	0.0571	0.0025	0.516	0.031	0.0656	0.0025	0.23872		410.804	15.1756	423	21	482	97	410.804	15.1756	UC Santa Cruz
Temora-II_65	67000	-1	0.0547	0.0022	0.506	0.029	0.0669	0.0026	0.47281		418.691	15.7637	415.5	20	394	86	418.691	15.7637	UC Santa Cruz
Temora-II_66	78000	31	0.0541	0.0022	0.511	0.029	0.06753	0.0025	0.36178		422.51	15.1486	417.6	20	349	90	422.51	15.1486	UC Santa Cruz
Temora-II_67	78100	11	0.0558	0.0021	0.516	0.029	0.0673	0.0026	0.49081		421.116	15.7579	421.2	20	440	85	421.116	15.7579	UC Santa Cruz
Temora-II_68	36140	9	0.0549	0.0025	0.505	0.032	0.0665	0.0026	0.35014		416.265	15.7695	416	21	386	100	416.265	15.7695	UC Santa Cruz
Temora-II_69	26540	-12	0.0561	0.0028	0.519	0.032	0.0664	0.0026	0.17085		415.658	15.771	424	21	454	110	415.658	15.771	UC Santa Cruz
Temora-II_70	23160	30	0.0542	0.0028	0.497	0.034	0.0662	0.0027	0.31177		414.445	16.3806	408	22	347	110	414.445	16.3806	UC Santa Cruz
Temora-II_71	53220	-26	0.0546	0.0023	0.491	0.029	0.0658	0.0025	0.33123		412.018	15.1728	404.4	19	380	92	412.018	15.1728	UC Santa Cruz
Temora-II_72	15730	-6	0.0526	0.0033	0.483	0.035	0.0673	0.0028	0.24145		421.116	16.9701	403	24	300	120	421.116	16.9701	UC Santa Cruz
Temora-II_73	40900	17	0.0556	0.0026	0.512	0.031	0.0674	0.0026	0.25699		421.722	15.7565	418	21	405	97	421.722	15.7565	UC Santa Cruz
Temora-II_74	113200	12	0.0546	0.0021	0.498	0.028	0.06666	0.0025	0.47435		417.235	15.1607	410.4	19	382	86	417.235	15.1607	UC Santa Cruz
Temora-II_75	17370	29	0.0551	0.0033	0.498	0.037	0.066	0.0027	0.23402		413.231	16.3836	409	25	400	130	413.231	16.3836	UC Santa Cruz
Temora-II_76	29310	9	0.0554	0.0028	0.498	0.032	0.0661	0.0026	0.30545		413.838	15.7753	409	22	402	110	413.838	15.7753	UC Santa Cruz
Temora-II_77	252700	47	0.05459	0.0018	0.506	0.027	0.06711	0.0025	0.58591		419.964	15.1544	416	18	394	77	419.964	15.1544	UC Santa Cruz
Temora-II_78	127000	27	0.05344	0.0019	0.5	0.028	0.0662	0.0025	0.64653		414.445	15.1671	412.6	19	352	84	414.445	15.1671	UC Santa Cruz
Temora-II_79	94800	1	0.0546	0.0025	0.506	0.034	0.066	0.0028	0.52236		413.231	16.9903	414	23	374	100	413.231	16.9903	UC Santa Cruz	DT:TRIM
Temora-II_80	87700	19	0.0554	0.0021	0.518	0.029	0.067	0.0025	0.46777		419.297	15.156	424.7	20	420	85	419.297	15.156	UC Santa Cruz
Temora-II_81	53350	30	0.0554	0.0025	0.516	0.031	0.06586	0.0025	0.28848		412.382	15.1719	423	21	397	96	412.382	15.1719	UC Santa Cruz
Temora-II_82	50500	-6	0.0554	0.0024	0.525	0.031	0.0678	0.0027	0.43567		424.146	16.3564	426	21	417	94	424.146	16.3564	UC Santa Cruz
Temora-II_83	42100	19	0.0545	0.0026	0.563	0.036	0.0726	0.0031	0.46579		453.163	18.6971	452	23	373	100	453.163	18.6971	UC Santa Cruz
Temora-II_84	42300	2	0.056	0.0024	0.514	0.031	0.0656	0.0025	0.36162		410.803	15.1756	420	21	431	94	410.803	15.1756	UC Santa Cruz
Temora-II_85	19790	46	0.0545	0.003	0.508	0.036	0.0665	0.0027	0.29907		416.265	16.376	413	24	353	110	416.265	16.376	UC Santa Cruz
Temora-II_86	46900	48	0.054	0.0024	0.501	0.03	0.0662	0.0025	0.27593		414.445	15.1672	412	20	346	94	414.445	15.1672	UC Santa Cruz
Temora-II_87	45320	9	0.0559	0.0023	0.519	0.031	0.0666	0.0026	0.48235		416.872	15.768	424	20	430	91	416.872	15.768	UC Santa Cruz
Temora-II_88	107300	39	0.0546	0.002	0.5079	0.028	0.06701	0.0025	0.52147		419.358	15.1558	416.4	19	391	82	419.358	15.1558	UC Santa Cruz
Temora-II_89	33120	32	0.0555	0.0025	0.507	0.032	0.0662	0.0026	0.37065		414.445	15.7739	414	21	401	96	414.445	15.7739	UC Santa Cruz
Temora-II_90	42810	-14	0.0576	0.0026	0.522	0.031	0.0665	0.0026	0.28996		416.265	15.7695	424	21	498	98	416.265	15.7695	UC Santa Cruz
Temora-II_91	56960	-19	0.0561	0.0023	0.51	0.03	0.0659	0.0025	0.35651		412.624	15.1713	418.7	20	438	91	412.624	15.1713	UC Santa Cruz
Temora-II_92	83900	36	0.0558	0.0021	0.524	0.03	0.06823	0.0025	0.57415		426.751	15.1388	427.8	20	439	84	426.751	15.1388	UC Santa Cruz
Temora-II_93	85600	8	0.0556	0.0022	0.5	0.029	0.06623	0.0025	0.44665		414.627	15.1667	411.1	20	417	90	414.627	15.1667	UC Santa Cruz
Temora-II_94	45110	-17	0.0554	0.0025	0.497	0.03	0.0654	0.0025	0.23101		409.589	15.1784	410	21	413	100	409.589	15.1784	UC Santa Cruz
Temora-II_95	85200	21	0.0538	0.0021	0.496	0.028	0.06657	0.0025	0.25672		416.69	15.162	407.8	19	345	85	416.69	15.162	UC Santa Cruz
Temora-II_96	40400	4	0.0549	0.0024	0.517	0.031	0.0682	0.0027	0.42032		426.569	16.3504	424	21	387	94	426.569	16.3504	UC Santa Cruz
Temora-II_97	40660	44	0.0541	0.0025	0.5	0.031	0.0679	0.0026	0.37693		424.752	15.7492	411	21	342	97	424.752	15.7492	UC Santa Cruz
Temora-II_98	251000	47	0.05752	0.002	0.522	0.029	0.06704	0.0025	0.64265		419.54	15.1554	426.3	19	510	78	419.54	15.1554	UC Santa Cruz
Temora-II_99	318000	15	0.05571	0.0019	0.4926	0.027	0.065	0.0025	0.78898		407.16	15.1839	406.1	18	448	76	407.16	15.1839	UC Santa Cruz
Temora-II_100	28450	30	0.0558	0.0027	0.503	0.032	0.0658	0.0026	0.23872		412.018	15.7797	411	22	435	110	412.018	15.7797	UC Santa Cruz
Temora-II_101	43910	19	0.0549	0.0025	0.508	0.031	0.0681	0.0027	0.41451		425.963	16.3519	416	21	405	98	425.963	16.3519	UC Santa Cruz
Temora-II_102	43200	5	0.0543	0.0024	0.486	0.03	0.067	0.0026	0.25147		419.297	15.7622	401	20	363	98	419.297	15.7622	UC Santa Cruz
Temora-II_103	58100	-21	0.0548	0.0023	0.499	0.029	0.0669	0.0026	0.43683		418.691	15.7637	409.3	20	399	92	418.691	15.7637	UC Santa Cruz
Temora-II_104	29300	28	0.0527	0.0026	0.474	0.031	0.067	0.0027	0.40461		419.297	16.3685	393	22	333	110	419.297	16.3685	UC Santa Cruz
Temora-II_105	19000	10	0.0563	0.0031	0.499	0.034	0.0661	0.0027	0.28107		413.838	16.3821	408	23	428	120	413.838	16.3821	UC Santa Cruz
Temora-II_106	32	42																	UC Santa Cruz
Temora-II_107	33300	36	0.0559	0.0028	0.51	0.034	0.0666	0.0026	0.024367		416.872	15.7681	415	23	408	110	416.872	15.7681	UC Santa Cruz
Temora-II_108	23460	-27	0.0559	0.0031	0.497	0.034	0.0664	0.0026	0.29352		415.658	15.771	411	23	400	120	415.658	15.771	UC Santa Cruz
Temora-II_109	52010	18	0.0571	0.0024	0.512	0.03	0.0658	0.0026	0.41164		412.018	15.7797	419	20	473	94	412.018	15.7797	UC Santa Cruz
Temora-II_110	39500	10	0.0562	0.0027	0.502	0.03	0.0648	0.0026	0.27179		405.945	15.7942	418	21	431	98	405.945	15.7942	UC Santa Cruz
Temora-II_111	37000	68	0.0548	0.0026	0.516	0.032	0.0671	0.0027	0.39927		419.903	16.367	421	22	397	100	419.903	16.367	UC Santa Cruz
Temora-II_112	84300	-5	0.0562	0.0021	0.529	0.031	0.068	0.0026	0.57013		425.357	15.7477	431.7	20	455	84	425.357	15.7477	UC Santa Cruz
Temora-II_113	74300	42	0.0536	0.0023	0.565	0.035	0.0733	0.0029	0.48107		457.384	17.4796	452	23	350	95	457.384	17.4796	UC Santa Cruz
Temora-II_114	48510	-13	0.0578	0.0025	0.524	0.031	0.0649	0.0025	0.20772		406.552	15.1854	431	21	513	96	406.552	15.1854	UC Santa Cruz
Temora-II_115	19370	42	0.0534	0.0033	0.484	0.036	0.0654	0.0026	0.25403		409.589	15.7856	398	25	300	120	409.589	15.7856	UC Santa Cruz
Temora-II_116	39370	-34	0.0551	0.0026	0.514	0.032	0.0663	0.0026	0.19599		415.052	15.7724	423	21	416	100	415.052	15.7724	UC Santa Cruz
Temora-II_117	45000	25	0.0552	0.0024	0.494	0.03	0.0655	0.0026	0.42714		410.196	15.784	409	21	404	94	410.196	15.784	UC Santa Cruz
Temora-II_118	318000	34	0.05512	0.0019	0.511	0.028	0.0682	0.0027	0.74819		426.569	16.3504	419.7	19	420	77	426.569	16.3504	UC Santa Cruz
Temora-II_119	29690	-7	0.0556	0.0028	0.504	0.033	0.0657	0.0026	0.4526		411.411	15.7811	413	23	434	110	411.411	15.7811	UC Santa Cruz
Temora-II_120	102700	-18	0.056	0.0021	0.505	0.029	0.066	0.0026	0.61741		413.231	15.7767	413.7	20	442	81	413.231	15.7767	UC Santa Cruz
Temora-II_121	42990	-1	0.0547	0.0024	0.497	0.031	0.0674	0.0026	0.49309		421.722	15.7564	410	21	378	97	421.722	15.7564	UC Santa Cruz
Temora-II_122	90900	-9	0.0558	0.0022	0.513	0.029	0.0672	0.0027	0.065915		420.51	16.3654	418.9	20	420	88	420.51	16.3654	UC Santa Cruz
Temora-II_123	76500	10	0.0544	0.0021	0.512	0.03	0.0674	0.0026	0.53502		421.722	15.7564	419.5	20	393	93	421.722	15.7564	UC Santa Cruz
Temora-II_124	43310	27	0.0552	0.0025	0.506	0.03	0.067	0.0026	0.37779		419.297	15.7622	414	21	397	96	419.297	15.7622	UC Santa Cruz
Temora-II_125	7040	31	0.0565	0.005	0.503	0.049	0.0639	0.0031	0.34673		400.475	18.8474	405	33	450	170	400.475	18.8474	UC Santa Cruz
Temora-II_126	15510	-24	0.0545	0.0031	0.496	0.035	0.0658	0.0028	0.17556		412.017	16.9935	405	23	359	120	412.017	16.9935	UC Santa Cruz
Temora-II_127	36900	-1	0.0564	0.0026	0.504	0.032	0.0671	0.0027	0.39861		419.903	16.367	413	22	437	99	419.903	16.367	UC Santa Cruz
Temora-II_128	72600	8	0.0553	0.0022	0.507	0.029	0.0672	0.0027	0.42088		420.51	16.3654	415.3	20	410	88	420.51	16.3654	UC Santa Cruz
Temora-II_129	28050	-5	0.0568	0.0029	0.515	0.034	0.0662	0.0026	0.37613		414.445	15.7739	422	23	448	110	414.445	15.7739	UC Santa Cruz
Temora-II_130	64800	43	0.0532	0.0021	0.49	0.028	0.0662	0.0026	0.45211		414.445	15.7738	405.3	20	330	89	414.445	15.7738	UC Santa Cruz
Temora-II_131	87400	83	0.0548	0.0022	0.51	0.029	0.0662	0.0026	0.3419		414.445	15.7738	418	19	403	89	414.445	15.7738	UC Santa Cruz
Temora-II_132	101800	5	0.0563	0.0021	0.525	0.029	0.0664	0.0026	0.6179		415.658	15.7709	428.2	19	449	82	415.658	15.7709	UC Santa Cruz
Temora-II_133	41000	36	0.0545	0.0024	0.519	0.031	0.0687	0.0027	0.32036		429.596	16.3429	425	20	381	96	429.596	16.3429	UC Santa Cruz
Temora-II_134	39800	-44	0.0573	0.0027	0.54	0.033	0.0682	0.0027	0.29393		426.569	16.3504	437	22	475	100	426.569	16.3504	UC Santa Cruz
Temora-II_135	117200	4	0.0551	0.002	0.497	0.028	0.0647	0.0025	0.57328		405.337	15.1881	409	19	406	83	405.337	15.1881	UC Santa Cruz
Temora-II_136	34110	-15	0.0547	0.0025	0.514	0.032	0.0678	0.0027	0.39651		424.146	16.3564	421	21	371	98	424.146	16.3564	UC Santa Cruz
Temora-II_137	33800	35	0.0555	0.0025	0.518	0.032	0.0673	0.0026	0.36327		421.116	15.7579	425	22	428	100	421.116	15.7579	UC Santa Cruz
Temora-II_138	39750	21	0.0563	0.0026	0.524	0.032	0.0665	0.0026	0.34635		416.265	15.7695	430	21	436	99	416.265	15.7695	UC Santa Cruz
Temora-II_139	52000	49	0.0566	0.0025	0.511	0.031	0.066	0.0026	0.35296		413.231	15.7768	419	20	447	96	413.231	15.7768	UC Santa Cruz
Temora-II_140	144400	44	0.05552	0.002	0.518	0.029	0.0676	0.0026	0.63775		422.934	15.7535	422.9	19	430	83	422.934	15.7535	UC Santa Cruz
Temora-II_141	26430	5	0.0553	0.0027	0.498	0.032	0.0655	0.0027	0.36835		410.196	16.3911	411	22	407	100	410.196	16.3911	UC Santa Cruz
Temora-II_142	41070	-38	0.0478	0.0023	0.443	0.029	0.0665	0.0027	0.34456		416.265	16.376	374	20	119	98	416.265	16.376	UC Santa Cruz
Temora-II_143	85300	38	0.0547	0.0021	0.492	0.028	0.0662	0.0026	0.50805		414.445	15.7738	406.7	19	401	90	414.445	15.7738	UC Santa Cruz
Temora-II_144	95300	-21	0.0542	0.0021	0.502	0.029	0.0667	0.0026	0.54764		417.478	15.7666	411.7	20	366	87	417.478	15.7666	UC Santa Cruz
Temora-II_145	35080	68	0.0539	0.0027	0.491	0.032	0.0656	0.0027	0.39201		410.803	16.3896	404	22	336	100	410.803	16.3896	UC Santa Cruz
Temora-II_146	132000	12	0.0547	0.002	0.508	0.029	0.0678	0.0027	0.61442		424.146	16.3564	416.9	19	387	84	424.146	16.3564	UC Santa Cruz
Temora-II_147	108000	38	0.0564	0.002	0.526	0.029	0.0675	0.0025	0.4853		422.328	15.149	428.1	19	457	83	422.328	15.149	UC Santa Cruz
Temora-II_148	32790	-4	0.0544	0.0027	0.511	0.032	0.0677	0.0027	0.35041		423.54	16.358	419	22	375	100	423.54	16.358	UC Santa Cruz
Temora-II_149	69030	75	0.056	0.0025	0.504	0.031	0.0654	0.0026	0.49868		409.589	15.7855	413	21	430	95	409.589	15.7855	UC Santa Cruz
Temora-II_150	30730	37	0.0581	0.0028	0.533	0.035	0.0662	0.0027	0.54324		414.445	16.3806	432	24	516	100	414.445	16.3806	UC Santa Cruz
Temora-II_151	42270	24	0.0551	0.0025	0.494	0.031	0.0667	0.0026	0.43507		417.478	15.7666	408	21	396	94	417.478	15.7666	UC Santa Cruz
Temora-II_152	22300	31	0.056	0.003	0.513	0.035	0.0672	0.0027	0.36756		420.51	16.3655	420	23	420	110	420.51	16.3655	UC Santa Cruz
Temora-II_153	80900	-5	0.0548	0.0021	0.496	0.028	0.06654	0.0025	0.47467		416.508	15.1624	407.9	19	401	84	416.508	15.1624	UC Santa Cruz
Temora-II_154	24980	16	0.0545	0.003	0.498	0.035	0.0656	0.0027	0.29818		410.803	16.3896	408	24	375	110	410.803	16.3896	UC Santa Cruz
Temora-II_155	120400	0	0.0545	0.002	0.5	0.028	0.0673	0.0026	0.58821		421.116	15.7579	411	19	378	83	421.116	15.7579	UC Santa Cruz
Temora-II_156	49760	15	0.0543	0.0024	0.488	0.03	0.0663	0.0026	0.45029		415.052	15.7724	404	21	367	97	415.052	15.7724	UC Santa Cruz
Temora-II_157	57700	1	0.0562	0.0023	0.507	0.03	0.0667	0.0026	0.42994		417.478	15.7666	414.9	20	449	90	417.478	15.7666	UC Santa Cruz
Temora-II_158	57100	71	0.0549	0.0022	0.499	0.029	0.0666	0.0026	0.34106		416.871	15.768	410.4	20	398	90	416.871	15.768	UC Santa Cruz
Temora-II_159	67300	-1	0.0567	0.0023	0.525	0.03	0.0673	0.0026	0.43858		421.116	15.7579	427.6	20	467	88	421.116	15.7579	UC Santa Cruz
Temora-II_160	177400	34	0.0553	0.002	0.502	0.027	0.0673	0.0026	0.63817		421.116	15.7579	413.9	19	428	77	421.116	15.7579	UC Santa Cruz
Temora-II_161	33510	8	0.0556	0.0026	0.49	0.031	0.0661	0.0027	0.34324		413.838	16.382	405	21	422	99	413.838	16.382	UC Santa Cruz
Temora-II_162	28280	27	0.0559	0.0028	0.498	0.031	0.0661	0.0027	0.24255		413.838	16.3821	410	21	422	100	413.838	16.3821	UC Santa Cruz
Temora-II_163	25480	-37	0.0556	0.003	0.485	0.032	0.0654	0.0027	0.1966		409.589	16.3926	402	22	399	110	409.589	16.3926	UC Santa Cruz
Temora-II_164	80400	-4	0.0543	0.0022	0.499	0.029	0.0684	0.0026	0.49552		427.78	15.7419	410.7	20	384	91	427.78	15.7419	UC Santa Cruz
Temora-II_165	54570	-8	0.0558	0.0023	0.488	0.029	0.0654	0.0026	0.53894		409.589	15.7855	404.3	19	418	90	409.589	15.7855	UC Santa Cruz
Temora-II_166	32260	-9	0.0538	0.0025	0.481	0.03	0.0657	0.0026	0.23165		411.411	15.7811	400	21	350	100	411.411	15.7811	UC Santa Cruz
Temora-II_167	49200	58	0.0524	0.0022	0.465	0.028	0.0646	0.0025	0.37716		404.73	15.1895	388	19	311	93	404.73	15.1895	UC Santa Cruz
Temora-II_168	124000	34	0.05561	0.002	0.526	0.029	0.0695	0.0027	0.58854		434.437	16.3309	427.9	20	436	82	434.437	16.3309	UC Santa Cruz
Temora-II_169	33730	64	0.0551	0.0026	0.516	0.032	0.0673	0.0027	0.34111		421.116	16.364	421	21	395	100	421.116	16.364	UC Santa Cruz
Temora-II_170	82300	-9	0.0538	0.0022	0.5	0.029	0.0668	0.0026	0.48197		418.084	15.7651	411.4	19	340	88	418.084	15.7651	UC Santa Cruz
Temora-II_171	30130	40	0.0574	0.0029	0.535	0.036	0.0669	0.0027	0.13143		418.691	16.37	432	23	456	110	418.691	16.37	UC Santa Cruz
Temora-II_172	36880	12	0.055	0.0025	0.515	0.032	0.0664	0.0027	0.4017		415.658	16.3775	421	22	388	100	415.658	16.3775	UC Santa Cruz
Temora-II_173	133400	10	0.0559	0.0021	0.535	0.031	0.0671	0.0028	0.66177		419.903	16.9731	435.9	20	442	84	419.903	16.9731	UC Santa Cruz
Temora-II_174	66000	26	0.0567	0.0023	0.531	0.031	0.0671	0.0026	0.43956		419.903	15.7608	432.3	20	477	90	419.903	15.7608	UC Santa Cruz
Temora-II_175	33300	52	0.0563	0.0025	0.527	0.033	0.0668	0.0027	0.44145		418.084	16.3715	428	22	442	96	418.084	16.3715	UC Santa Cruz
Temora-II_176	36880	-1	0.0547	0.0026	0.506	0.031	0.0663	0.0026	0.28927		415.052	15.7724	416	21	369	100	415.052	15.7724	UC Santa Cruz
Temora-II_177	14820	15	0.056	0.0033	0.499	0.035	0.0651	0.0028	0.29463		407.767	17.0045	412	25	430	120	407.767	17.0045	UC Santa Cruz
Temora-II_178	69400	38	0.056	0.0023	0.512	0.029	0.0663	0.0026	0.47449		415.052	15.7724	420.9	19	443	90	415.052	15.7724	UC Santa Cruz
Temora-II_179	131300	-1	0.0558	0.0022	0.53	0.03	0.0693	0.0029	0.097251		433.227	17.5438	432.8	21	437	86	433.227	17.5438	UC Santa Cruz
Temora-II_180	22650	57	0.0556	0.003	0.517	0.034	0.0669	0.0027	0.21667		418.691	16.37	421	23	408	110	418.691	16.37	UC Santa Cruz
Temora-II_181	38440	-4	0.0553	0.0026	0.507	0.032	0.066	0.0026	0.21867		413.231	15.7768	414	21	401	100	413.231	15.7768	UC Santa Cruz
Temora-II_182	94610	35	0.0556	0.0021	0.511	0.029	0.0666	0.0025	0.20069		416.872	15.1616	417.8	20	416	84	416.872	15.1616	UC Santa Cruz
Temora-II_183	40970	42	0.0551	0.0025	0.508	0.031	0.0665	0.0027	0.39546		416.265	16.376	418	20	432	97	416.265	16.376	UC Santa Cruz
Temora-II_184	199800	-1	0.05499	0.002	0.511	0.028	0.0671	0.0026	0.68629		419.903	15.7608	418.8	19	411	81	419.903	15.7608	UC Santa Cruz
Temora-II_185	60760	31	0.0557	0.0024	0.505	0.03	0.0662	0.0026	0.37879		414.445	15.7738	415.7	20	446	92	414.445	15.7738	UC Santa Cruz
Temora-II_186	18910	47	0.0543	0.003	0.503	0.034	0.0659	0.0027	0.31556		412.624	16.3851	417	23	374	110	412.624	16.3851	UC Santa Cruz
Temora-II_187	49000	27	0.0558	0.0024	0.514	0.031	0.0667	0.0026	0.4438		417.478	15.7666	419	21	427	90	417.478	15.7666	UC Santa Cruz
Temora-II_188	33540	31	0.0577	0.0026	0.553	0.035	0.069	0.0028	0.45374		431.412	16.9435	447	22	486	97	431.412	16.9435	UC Santa Cruz
Temora-II_189	63600	31	0.0556	0.0025	0.511	0.032	0.0662	0.0026	-0.11829		414.445	15.7739	417	21	403	94	414.445	15.7739	UC Santa Cruz
Temora-II_190	89000	-12	0.0557	0.0023	0.518	0.03	0.0669	0.0026	0.32058		418.691	15.7637	423.6	20	437	94	418.691	15.7637	UC Santa Cruz
Temora-II_191	25180	9	0.054	0.0028	0.49	0.033	0.0662	0.0026	0.25156		414.445	15.7739	402	22	341	100	414.445	15.7739	UC Santa Cruz
Temora-II_192	35480	4	0.0577	0.003	0.539	0.035	0.0677	0.0027	-0.041947		423.54	16.358	434	23	467	110	423.54	16.358	UC Santa Cruz
Temora-II_193	29660	16	0.0573	0.0027	0.517	0.034	0.0668	0.0027	0.50364		418.084	16.3715	420	22	465	100	418.084	16.3715	UC Santa Cruz
Temora-II_194	48200	18	0.0558	0.0024	0.509	0.03	0.06613	0.0025	0.24836		414.02	15.1681	417	21	435	95	414.02	15.1681	UC Santa Cruz
Temora-II_195	67600	25	0.0575	0.0024	0.515	0.03	0.0658	0.0025	0.29434		412.018	15.1728	421.2	20	488	92	412.018	15.1728	UC Santa Cruz
Temora-II_196	22000	35	0.0546	0.003	0.497	0.034	0.0673	0.0027	0.25752		421.116	16.364	406	23	373	110	421.116	16.364	UC Santa Cruz
Temora-II_197	43400	-3	0.0541	0.0023	0.495	0.029	0.0676	0.0026	0.27277		422.934	15.7535	409	20	366	93	422.934	15.7535	UC Santa Cruz
Temora-II_198	72700	-7	0.0543	0.0021	0.496	0.029	0.0668	0.0026	0.52463		418.084	15.7651	409.8	19	374	88	418.084	15.7651	UC Santa Cruz
Temora-II_199	16410	20	0.0541	0.003	0.495	0.034	0.0667	0.0027	0.23623		417.478	16.373	409	22	369	120	417.478	16.373	UC Santa Cruz
Temora-II_200	69500	-35	0.0548	0.0022	0.499	0.029	0.0657	0.0025	0.49132		411.411	15.1741	410	20	399	91	411.411	15.1741	UC Santa Cruz
Temora-II_201	15580	-10	0.054	0.0034	0.492	0.035	0.0658	0.0026	0.12628		412.018	15.7797	406	25	380	130	412.018	15.7797	UC Santa Cruz
Temora-II_202	82300	27	0.0548	0.0021	0.511	0.029	0.068	0.0026	0.43985		425.357	15.7477	419.7	20	401	84	425.357	15.7477	UC Santa Cruz
Temora-II_203	49900	16	0.0571	0.0038	0.535	0.042	0.0672	0.0027	-0.0041307		420.51	16.3656	424	17	405	87	420.51	16.3656	UC Santa Cruz
Temora-II_204	27270	34	0.0539	0.0028	0.493	0.032	0.0658	0.0026	0.2672		412.018	15.7797	408	21	325	110	412.018	15.7797	UC Santa Cruz
Temora-II_205	-3	26																	UC Santa Cruz
Temora-II_206	42600	5	0.0532	0.0024	0.498	0.031	0.0669	0.0027	0.45321		418.691	16.37	410	21	328	97	418.691	16.37	UC Santa Cruz
Temora-II_207	32400	1	0.0537	0.0025	0.501	0.032	0.0675	0.0027	0.31833		422.328	16.3609	414	21	330	100	422.328	16.3609	UC Santa Cruz
Temora-II_208	51200	-1	0.0546	0.0026	0.497	0.031	0.0662	0.0028	-0.075565		414.445	16.9872	408	21	367	100	414.445	16.9872	UC Santa Cruz
Temora-II_209	42170	11	0.0556	0.0026	0.506	0.031	0.0656	0.0026	0.36155		410.803	15.7826	415	21	406	100	410.803	15.7826	UC Santa Cruz
Temora-II_210	26290	5	0.054	0.0028	0.511	0.035	0.0677	0.0028	0.42463		423.54	16.9638	416	24	338	100	423.54	16.9638	UC Santa Cruz
*If 206Pb/238U age <= 800 Ma, age was corrected for common Pb using 207Pb for samples analyzed on the UC Santa Cruz Earth and Marine Sciences single collector LA-ICP-MS. Corrected for common Pb using 204Pb for samples analyzed on the University of Arizona multi-collector LA-ICP-MS.

## Sheet: TableS3_Isotopes_and_ages
Table S3. Compilation of stable isotope data from prior work and updated age constraints
			Coordinates†		Depositional age constraints			Plotted chemical abundances						References
Sample	Rock	Stratigraphic position	Latitude	Longitude	Minimum	Maximum	Best age	d18O	±1σ	d13C	±1σ	87Sr	Sr	Minimum	Maximum	Isotopic
number	type	(m above section base)	(º in NAD27*)	(º in NAD27*)	(Ma)	(Ma)	(Ma)	(‰ VSMOW‡)	(‰ VSMOW‡)	(‰ VPDBˆ)	(‰ VPDBˆ)	86Sr	(ppm)	depositional age	depositional age	measurement
QTHR-08	Limestone	165	[unknown]	[unknown]	1.8	3.6	3.3	17.05	NaN	6.1	NaN	NaN	NaN	Smith & Ketner (1976)	Smith & Ketner (1976)	Horton et al. (2004)
QTHR-16	Shale	150	[unknown]	[unknown]	1.8	3.6	3.2	15.81	NaN	3.7	NaN	NaN	NaN	Smith & Ketner (1976)	Smith & Ketner (1976)	Horton et al. (2004)
QTHR-15	Shale	135	[unknown]	[unknown]	1.8	3.6	3.1	15.71	NaN	0.1	NaN	NaN	NaN	Smith & Ketner (1976)	Smith & Ketner (1976)	Horton et al. (2004)
QTHR-14	Limestone	120	[unknown]	[unknown]	1.8	3.6	3	16.12	NaN	2.9	NaN	NaN	NaN	Smith & Ketner (1976)	Smith & Ketner (1976)	Horton et al. (2004)
QTHR-13	Shale	105	[unknown]	[unknown]	1.8	3.6	2.9	15.6	NaN	-1.1	NaN	NaN	NaN	Smith & Ketner (1976)	Smith & Ketner (1976)	Horton et al. (2004)
QTHR-12	Shale	90	[unknown]	[unknown]	1.8	3.6	2.8	16.53	NaN	3.8	NaN	NaN	NaN	Smith & Ketner (1976)	Smith & Ketner (1976)	Horton et al. (2004)
QTHR-10	Limestone	75	[unknown]	[unknown]	1.8	3.6	2.7	16.63	NaN	-0.2	NaN	NaN	NaN	Smith & Ketner (1976)	Smith & Ketner (1976)	Horton et al. (2004)
QTHR-09	Shale	60	[unknown]	[unknown]	1.8	3.6	2.6	16.94	NaN	3.3	NaN	NaN	NaN	Smith & Ketner (1976)	Smith & Ketner (1976)	Horton et al. (2004)
QTHR-06	[smectite]	45	[unknown]	[unknown]	1.8	3.6	2.5	20.1391	NaN	NaN	NaN	NaN	NaN	Smith & Ketner (1976)	Smith & Ketner (1976)	Horton et al. (2004)
QTHR-05	[smectite]	30	[unknown]	[unknown]	1.8	3.6	2.4	15.6033	NaN	NaN	NaN	NaN	NaN	Smith & Ketner (1976)	Smith & Ketner (1976)	Horton et al. (2004)
QTHR-03	Shale	15	[unknown]	[unknown]	1.8	3.6	2.3	16.02	NaN	-9.1	NaN	NaN	NaN	Smith & Ketner (1976)	Smith & Ketner (1976)	Horton et al. (2004)
QTHR-01	Shale	0	[unknown]	[unknown]	1.8	3.6	2.2	15.81	NaN	-8.9	NaN	NaN	NaN	Smith & Ketner (1976)	Smith & Ketner (1976)	Horton et al. (2004)
NV-HF 06-07	Paleosol	99.67	40.6105	-115.691	8.01	15.03	13.38	15.23	NaN	-0.45	NaN	NaN	NaN	Lund Snee et al. (2016) sample 12HBD09	This study sample 15JLS041	Mulch et al. (2015) and sources therein
NV-HF 07-07	Paleosol	99.67	40.6105	-115.691	8.01	15.03	13.38	13.28	NaN	-2.11	NaN	NaN	NaN	Lund Snee et al. (2016) sample 12HBD09	This study sample 15JLS041	Mulch et al. (2015) and sources therein
NV-HF 10-07	Paleosol	86.87	40.6115	-115.692	8.01	15.03	13.57	12.2	NaN	-2.02	NaN	0.71055	26.9	Lund Snee et al. (2016) sample 12HBD09	This study sample 15JLS041	Mulch et al. (2015) and sources therein
NV-HF 11-07	Cement from gravels	86.87	40.6115	-115.692	8.01	15.03	13.57	11.49	NaN	-2.65	NaN	NaN	NaN	Lund Snee et al. (2016) sample 12HBD09	This study sample 15JLS041	Mulch et al. (2015) and sources therein
NV-HF 12-07	Cement from gravels	86.87	40.6115	-115.692	8.01	15.03	13.57	13.12	NaN	-1.63	NaN	NaN	NaN	Lund Snee et al. (2016) sample 12HBD09	This study sample 15JLS041	Mulch et al. (2015) and sources therein
NV-HF 08-07	Carbonate	79.57	40.6114	-115.692	8.01	15.03	13.68	12.11	NaN	-2.2	NaN	NaN	NaN	Lund Snee et al. (2016) sample 12HBD09	This study sample 15JLS041	Mulch et al. (2015) and sources therein
NV-HF 09-07	Carbonate	79.57	40.6114	-115.692	8.01	15.03	13.68	12.46	NaN	-2.57	NaN	0.71062	38.7	Lund Snee et al. (2016) sample 12HBD09	This study sample 15JLS041	Mulch et al. (2015) and sources therein
NV-HF 05-07	Paleosol	32.16	40.6102	-115.697	8.01	15.03	14.39	12.37	NaN	-2	NaN	0.7092	61.5	Lund Snee et al. (2016) sample 12HBD09	This study sample 15JLS041	Mulch et al. (2015) and sources therein
NV-IW-40-07	Paleosol	669.1	40.5427	-115.852	14.4	15.75	15.17	13.27	NaN	-2.93	NaN	0.70873	95.9	Lund Snee et al. (2016) Tiws-J3	Lund Snee et al. (2016) sample Tiws-J4	Mulch et al. (2015) and sources therein
NV-IW-39-07	Paleosol	662.1	40.5426	-115.852	14.4	15.75	15.23	13.52	NaN	-3.47	NaN	NaN	NaN	Lund Snee et al. (2016) Tiws-J3	Lund Snee et al. (2016) sample Tiws-J4	Mulch et al. (2015) and sources therein
NV-IW-38-07	Paleosol	655.1	40.5425	-115.852	14.4	15.75	15.28	12.34	NaN	-4.35	NaN	NaN	NaN	Lund Snee et al. (2016) Tiws-J3	Lund Snee et al. (2016) sample Tiws-J4	Mulch et al. (2015) and sources therein
NV-IW-37-07	Paleosol	648.1	40.5425	-115.852	14.4	15.75	15.33	14.21	NaN	-3.54	NaN	NaN	NaN	Lund Snee et al. (2016) Tiws-J3	Lund Snee et al. (2016) sample Tiws-J4	Mulch et al. (2015) and sources therein
NV-IW-36-07	Paleosol	641.1	40.5424	-115.852	14.4	15.75	15.38	14.59	NaN	-3.58	NaN	NaN	NaN	Lund Snee et al. (2016) Tiws-J3	Lund Snee et al. (2016) sample Tiws-J4	Mulch et al. (2015) and sources therein
NV-IW-34-07	Paleosol	627.1	40.5423	-115.852	14.4	15.75	15.48	14.56	NaN	-3.22	NaN	NaN	NaN	Lund Snee et al. (2016) Tiws-J3	Lund Snee et al. (2016) sample Tiws-J4	Mulch et al. (2015) and sources therein
07-IW-4a-G	Paleosol	624.6	40.5395	-115.853	14.4	15.75	15.5	15	NaN	-4.6	NaN	NaN	NaN	Lund Snee et al. (2016) Tiws-J3	Lund Snee et al. (2016) sample Tiws-J4	Mulch et al. (2015) and sources therein
07-IW-2a-J	Paleosol	623.2	40.5394	-115.854	15.27	15.75	15.52	20.3	NaN	4.2	NaN	NaN	NaN	Lund Snee et al. (2016) average of ELM11-PN11 and ELM11-PN13	Lund Snee et al. (2016) sample Tiws-J4	Mulch et al. (2015) and sources therein
07-IW-3a-H	Paleosol	621.2	40.5395	-115.853	15.27	15.75	15.53	17.2	NaN	-0.2	NaN	NaN	NaN	Lund Snee et al. (2016) average of ELM11-PN11 and ELM11-PN13	Lund Snee et al. (2016) sample Tiws-J4	Mulch et al. (2015) and sources therein
NV-IW-33-07	Paleosol	620.1	40.5422	-115.852	15.53	15.75	15.53	11.55	NaN	-4.74	NaN	NaN	NaN	Lund Snee et al. (2016) average of ELM11-PN11 and ELM11-PN13	Lund Snee et al. (2016) sample Tiws-J4	Mulch et al. (2015) and sources therein
NV-IW-32-07	Paleosol	613.1	40.5421	-115.852	15.53	15.75	15.54	12.7	NaN	-4.11	NaN	NaN	NaN	Lund Snee et al. (2016) average of ELM11-PN11 and ELM11-PN13	Lund Snee et al. (2016) sample Tiws-J4	Mulch et al. (2015) and sources therein
07-IW-1a-P	Paleosol	564	40.5394	-115.854	15.53	15.75	15.61	16.4	NaN	1.6	NaN	NaN	NaN	Lund Snee et al. (2016) average of ELM11-PN11 and ELM11-PN13	Lund Snee et al. (2016) sample Tiws-J4	Mulch et al. (2015) and sources therein
NV-IW-20-07	Sandstone	465.2	40.5064	-115.87	15.53	15.75	15.74	12	NaN	-4.7	NaN	NaN	NaN	Lund Snee et al. (2016) average of ELM11-PN11 and ELM11-PN13	Lund Snee et al. (2016) sample Tiws-J4	Mulch et al. (2015) and sources therein
NV-IW-19-07	Sandstone	464.2	40.5064	-115.87	15.53	15.75	15.74	10.01	NaN	-5.38	NaN	0.70858	57.9	Lund Snee et al. (2016) average of ELM11-PN11 and ELM11-PN13	Lund Snee et al. (2016) sample Tiws-J4	Mulch et al. (2015) and sources therein
NV-IW-18-07	Sandstone	462.4	40.5064	-115.87	15.53	15.75	15.74	10.17	NaN	-4.27	NaN	NaN	NaN	Lund Snee et al. (2016) average of ELM11-PN11 and ELM11-PN13	Lund Snee et al. (2016) sample Tiws-J4	Mulch et al. (2015) and sources therein
NV-IW-17-07	Sandstone	460.2	40.5063	-115.87	15.53	15.75	15.75	11.67	NaN	-4.6	NaN	NaN	NaN	Lund Snee et al. (2016) average of ELM11-PN11 and ELM11-PN13	Lund Snee et al. (2016) sample Tiws-J4	Mulch et al. (2015) and sources therein
NV-IW-16-07	Sandstone	459.2	40.5063	-115.87	15.53	15.75	15.75	11.29	NaN	-5.66	NaN	NaN	NaN	Lund Snee et al. (2016) average of ELM11-PN11 and ELM11-PN13	Lund Snee et al. (2016) sample Tiws-J4	Mulch et al. (2015) and sources therein
NV-IW-15-07	Sandstone	458.2	40.5063	-115.87	15.53	15.75	15.75	11.19	NaN	-4.81	NaN	NaN	NaN	Lund Snee et al. (2016) average of ELM11-PN11 and ELM11-PN13	Lund Snee et al. (2016) sample Tiws-J4	Mulch et al. (2015) and sources therein
NV-IW-13-07	Sandstone	457.2	40.5063	-115.87	15.53	16.9	15.75	10.73	NaN	-4.34	NaN	NaN	NaN	Lund Snee et al. (2016) Tiws-J4	This study sample 15JLS017	Mulch et al. (2015) and sources therein
NV-IW-12-07	Sandstone	456.2	40.5063	-115.87	15.53	16.9	15.76	9.23	NaN	-4.22	NaN	NaN	NaN	Lund Snee et al. (2016) Tiws-J4	This study sample 15JLS017	Mulch et al. (2015) and sources therein
NV-IW-11-07	Sandstone	455.2	40.5062	-115.87	15.53	16.9	15.76	13.04	NaN	-4.96	NaN	NaN	NaN	Lund Snee et al. (2016) Tiws-J4	This study sample 15JLS017	Mulch et al. (2015) and sources therein
NV-IW-10-07	Channel sand	453.2	40.5062	-115.87	15.53	16.9	15.77	11.56	NaN	-3.39	NaN	NaN	NaN	Lund Snee et al. (2016) Tiws-J4	This study sample 15JLS017	Mulch et al. (2015) and sources therein
NV-IW-9-07	Sandstone	452.2	40.5062	-115.87	15.53	16.9	15.78	9.24	NaN	-5.44	NaN	NaN	NaN	Lund Snee et al. (2016) Tiws-J4	This study sample 15JLS017	Mulch et al. (2015) and sources therein
NV-IW-8-07	Sandstone	451.2	40.5062	-115.87	15.53	16.9	15.78	9.13	NaN	-3.93	NaN	NaN	NaN	Lund Snee et al. (2016) Tiws-J4	This study sample 15JLS017	Mulch et al. (2015) and sources therein
NV-IW-7-07	Sandstone 2	449.2	40.5061	-115.87	15.53	16.9	15.79	9.75	NaN	-4.57	NaN	NaN	NaN	Lund Snee et al. (2016) Tiws-J4	This study sample 15JLS017	Mulch et al. (2015) and sources therein
NV-IW-4-07	Sandstone 1	447.2	40.505	-115.87	15.53	16.9	15.8	10	NaN	-11.76	NaN	0.70852	69.9	Lund Snee et al. (2016) Tiws-J4	This study sample 15JLS017	Mulch et al. (2015) and sources therein
NV-IW-5-07	Sandstone 2	447.2	40.5051	-115.87	15.53	16.9	15.8	8.95	NaN	-5.73	NaN	NaN	NaN	Lund Snee et al. (2016) Tiws-J4	This study sample 15JLS017	Mulch et al. (2015) and sources therein
NV-IW-3-07	Ash	445.7	40.505	-115.87	15.53	16.9	15.81	10.92	NaN	-6.14	NaN	NaN	NaN	Lund Snee et al. (2016) Tiws-J4	This study sample 15JLS017	Mulch et al. (2015) and sources therein
NV-IW-2-07	Conglomerate	445.2	40.505	-115.87	15.53	16.9	15.81	18.6	NaN	0.17	NaN	0.70851	87.5	Lund Snee et al. (2016) Tiws-J4	This study sample 15JLS017	Mulch et al. (2015) and sources therein
NV-IW-1-07	Conglomerate	443.2	40.505	-115.87	15.53	16.9	15.82	13.36	NaN	0.28	NaN	0.70866	155.4	Lund Snee et al. (2016) Tiws-J4	This study sample 15JLS017	Mulch et al. (2015) and sources therein
NV-EF-24-07	Limey shale	110	40.5786	-115.99	38.32	40	38.61	26.1	NaN	6.3	NaN	NaN	NaN	Henry et al. (2015) sample H10-45	Mulch et al. (2015) sample NV-28-07	Mulch et al. (2015) and sources therein
NV-EF-23-07	Limey shale	98	40.5786	-115.99	38.32	40	39.07	24.9	NaN	3.3	NaN	0.70766	634.6	Henry et al. (2015) sample H10-45	Mulch et al. (2015) sample NV-28-07	Mulch et al. (2015) and sources therein
NV-EF-22-07	Limey shale	95	40.5786	-115.99	38.32	40	39.19	14.4	NaN	-5.6	NaN	0.70802	85.9	Henry et al. (2015) sample H10-45	Mulch et al. (2015) sample NV-28-07	Mulch et al. (2015) and sources therein
NV-EF-20-07	Tuff	85	40.5786	-115.991	38.32	40.5	39.58	17.3	NaN	-8.2	NaN	NaN	NaN	Henry et al. (2015) sample H10-45	Mulch et al. (2015) sample NV-EF-29	Mulch et al. (2015) and sources therein
NV-EF-18-07	Limey shale	83	40.5786	-115.991	38.32	40.5	39.66	29.2	NaN	-2.2	NaN	0.70762	536.9	Henry et al. (2015) sample H10-45	Mulch et al. (2015) sample NV-EF-29	Mulch et al. (2015) and sources therein
NV-EF-19-07	Tuff	83	40.5786	-115.991	38.32	40.5	39.66	29.5	NaN	-0.8	NaN	NaN	NaN	Henry et al. (2015) sample H10-45	Mulch et al. (2015) sample NV-EF-29	Mulch et al. (2015) and sources therein
NV-EF-17-07	Sandstone	73	40.5786	-115.991	38.32	40.5	40.05	28.7	NaN	0	NaN	NaN	NaN	Henry et al. (2015) sample H10-45	Mulch et al. (2015) sample NV-EF-29	Mulch et al. (2015) and sources therein
NV-EF-16-07	Limestone	67	40.5786	-115.991	38.32	42	40.28	28.5	NaN	3.8	NaN	NaN	NaN	Henry et al. (2015) sample H10-45	Mulch et al. (2015) samples NV-EF-31-07 and NV-EF-32-07	Mulch et al. (2015) and sources therein
NV-EF-15-07	Limestone	66	40.5786	-115.991	38.32	42	40.32	29.6	NaN	7	NaN	NaN	NaN	Henry et al. (2015) sample H10-45	Mulch et al. (2015) samples NV-EF-31-07 and NV-EF-32-07	Mulch et al. (2015) and sources therein
NV-EF-14-07	Limey shale	61.5	40.5786	-115.991	38.32	42	40.5	29.7	NaN	6.1	NaN	NaN	NaN	Henry et al. (2015) sample H10-45	Mulch et al. (2015) samples NV-EF-31-07 and NV-EF-32-07	Mulch et al. (2015) and sources therein
NV-EF-13-07	Limey shale	58.5	40.5786	-115.991	38.32	42	40.61	17.6	NaN	-1	NaN	NaN	NaN	Henry et al. (2015) sample H10-45	Mulch et al. (2015) samples NV-EF-31-07 and NV-EF-32-07	Mulch et al. (2015) and sources therein
NV-EF-12-07	Limestone	51	40.5786	-115.991	38.32	42	40.91	26.8	NaN	11.1	NaN	NaN	NaN	Henry et al. (2015) sample H10-45	Mulch et al. (2015) samples NV-EF-31-07 and NV-EF-32-07	Mulch et al. (2015) and sources therein
NV-EF-11-07	Limestone	37	40.5786	-115.991	41.2	45.4	41.45	29.1	NaN	12.9	NaN	NaN	NaN	Henry et al. (2015) sample H10-45	Haynes (2003) sample 00-188GS pink air-fall tuff	Mulch et al. (2015) and sources therein
NV-EF-I0-07	Limestone	32.3	40.5786	-115.991	41.2	45.4	41.64	31.2	NaN	13	NaN	NaN	NaN	Henry et al. (2015) sample H10-45	Haynes (2003) sample 00-188GS pink air-fall tuff	Mulch et al. (2015) and sources therein
NV-EF-9-07	Limestone	28	40.5786	-115.991	41.2	45.4	41.8	28.9	NaN	13.2	NaN	NaN	NaN	Henry et al. (2015) sample H10-45	Haynes (2003) sample 00-188GS pink air-fall tuff	Mulch et al. (2015) and sources therein
NV-EF-8-07	Limey shale	17.5	40.5786	-115.991	41.2	45.4	42.21	25.5	NaN	11.1	NaN	NaN	NaN	Henry et al. (2015) sample H10-45	Haynes (2003) sample 00-188GS pink air-fall tuff	Mulch et al. (2015) and sources therein
NV-EF-7-07	Limestone	12.3	40.5786	-115.991	41.2	45.4	42.42	26.2	NaN	11.6	NaN	NaN	NaN	Henry et al. (2015) sample H10-45	Haynes (2003) sample 00-188GS pink air-fall tuff	Mulch et al. (2015) and sources therein
NV-EF-6-07	Limestone	11.2	40.5786	-115.991	41.2	45.4	42.46	29.7	NaN	10.9	NaN	NaN	NaN	Henry et al. (2015) sample H10-45	Haynes (2003) sample 00-188GS pink air-fall tuff	Mulch et al. (2015) and sources therein
NV-EF-5-07	Limestone	8	40.5786	-115.991	41.2	45.4	42.58	30.9	NaN	6.6	NaN	NaN	NaN	Henry et al. (2015) sample H10-45	Haynes (2003) sample 00-188GS pink air-fall tuff	Mulch et al. (2015) and sources therein
NV-EF-4-07	Limestone	6.5	40.5786	-115.991	41.2	45.4	42.64	27.1	NaN	9.7	NaN	0.70851	939.7	Henry et al. (2015) sample H10-45	Haynes (2003) sample 00-188GS pink air-fall tuff	Mulch et al. (2015) and sources therein
NV-EF-3-07	Paleosol	5	40.5786	-115.991	41.2	45.4	43.2	28.4	NaN	6.1	NaN	0.70784	1000.9	Henry et al. (2015) sample H10-45	Haynes (2003) sample 00-188GS pink air-fall tuff	Mulch et al. (2015) and sources therein
CL-10	Limestone	90	[unknown]	[unknown]	41.2	46.3	44.3	21.8	NaN	-2.1	NaN	0.707955	269.5	Haynes (2003) sample 00-188GS pink air-fall tuff	Smith & Ketner (1976) limited fossil data	Mulch et al. (2015) and sources therein
CL-11	Limestone	80	[unknown]	[unknown]	41.2	46.3	44.4	18.9	NaN	-2.5	NaN	NaN	NaN	Haynes (2003) sample 00-188GS pink air-fall tuff	Smith & Ketner (1976) limited fossil data	Mulch et al. (2015) and sources therein
CL-12	Limestone	70	[unknown]	[unknown]	41.2	46.3	44.5	19.2	NaN	-2	NaN	NaN	NaN	Haynes (2003) sample 00-188GS pink air-fall tuff	Smith & Ketner (1976) limited fossil data	Mulch et al. (2015) and sources therein
CL-15	Limestone	60	[unknown]	[unknown]	41.2	46.3	44.6	19.8	NaN	-2.1	NaN	NaN	NaN	Haynes (2003) sample 00-188GS pink air-fall tuff	Smith & Ketner (1976) limited fossil data	Mulch et al. (2015) and sources therein
CL-16	Limestone	50	[unknown]	[unknown]	41.2	46.3	44.7	18.5	NaN	-1.7	NaN	NaN	NaN	Haynes (2003) sample 00-188GS pink air-fall tuff	Smith & Ketner (1976) limited fossil data	Mulch et al. (2015) and sources therein
CL-17	Limestone	40	[unknown]	[unknown]	41.2	46.3	44.8	21.1	NaN	-4.4	NaN	0.708015	226.8	Haynes (2003) sample 00-188GS pink air-fall tuff	Smith & Ketner (1976) limited fossil data	Mulch et al. (2015) and sources therein
TL12-02	Limestone	30	[unknown]	[unknown]	41.2	46.3	44.9	25.6	NaN	3.1	NaN	0.708225	24.5	Haynes (2003) sample 00-188GS pink air-fall tuff	Smith & Ketner (1976) limited fossil data	Mulch et al. (2015) and sources therein
TL04-02	Limestone	20	[unknown]	[unknown]	41.2	46.3	45	25.3	NaN	2.1	NaN	0.708267	79.2	Haynes (2003) sample 00-188GS pink air-fall tuff	Smith & Ketner (1976) limited fossil data	Mulch et al. (2015) and sources therein
*NAD27—North American Datum 1927
†Italicized values indicate approximate locations
ˆVPDB—Vienna Peedee belemnite
‡VSMOW—Vienna standard mean ocean water

## Sheet: PlotDat4
Source sheet	data_isoplot	0.2	26.5743	1	24.2488	1.66932	0.85	22.5795
Plot name	Average1	183.8	26.5743	2	24.3564	0.965752	1.15	22.5795
Plot Type	15			3	24.5946	0.965718	1.15	25.9182
1st free col	8			4	24.7449	1.02749	0.85	25.9182
Sigma Level	2			5	24.7813	0.965692	0.85	22.5795
Absolute Errs	TRUE			6	24.9744	1.03005	ErrBox	ErrBox
Symbol Type	1			7	25.0195	0.965655	1.85	23.3906
Inverse Plot	FALSE			8	25.0259	1.86729	2.15	23.3906
Color Plot	TRUE			9	25.0388	0.901273	2.15	25.3221
3D plot	FALSE			10	25.1547	0.965635	1.85	25.3221
Linear	FALSE			11	25.1676	1.03001	1.85	23.3906
Data Range	Q7:R189			12	25.174	0.965637	ErrBox	ErrBox
Filled Symbols	TRUE			13	25.2191	1.09438	2.85	23.6289
ConcAge	FALSE			14	25.3285	1.09436	3.15	23.6289
ConcSwap	FALSE			15	25.3865	0.965599	3.15	25.5603
1st Symbol-row	1			16	25.3929	1.09436	2.85	25.5603
				17	25.3993	1.02997	2.85	23.6289
				18	25.4122	1.15872	ErrBox	ErrBox
				19	25.4143	1.02719	3.85	23.7174
				20	25.4379	1.02997	4.15	23.7174
				21	25.4637	1.02996	4.15	25.7723
				22	25.4766	1.15872	3.85	25.7723
				23	25.4766	1.09434	3.85	23.7174
				24	25.4766	1.22308	ErrBox	ErrBox
				25	25.4766	1.15872	4.85	23.8156
				26	25.4933	1.02726	5.15	23.8156
				27	25.5136	0.963088	5.15	25.747
				28	25.5183	1.0917	4.85	25.747
				29	25.5216	0.965578	4.85	23.8156
				30	25.5281	1.02995	ErrBox	ErrBox
				31	25.5286	1.54036	5.85	23.9444
				32	25.5409	1.28746	6.15	23.9444
				33	25.5409	1.15871	6.15	26.0045
				34	25.5667	1.02994	5.85	26.0045
				35	25.586	1.09433	5.85	23.9444
				36	25.6229	0.963075	ErrBox	ErrBox
				37	25.6516	0.963187	6.85	24.0539
				38	25.6632	1.02993	7.15	24.0539
				39	25.6826	1.02993	7.15	25.9852
				40	25.7212	1.02992	6.85	25.9852
				41	25.7984	1.09428	6.85	24.0539
				42	25.9079	1.02989	ErrBox	ErrBox
				43	25.9079	1.02989	7.85	23.1587
				44	25.9272	1.15863	8.15	23.1587
				45	25.9272	1.02989	8.15	26.8932
				46	25.94	1.02989	7.85	26.8932
				47	25.9529	1.02989	7.85	23.1587
				48	25.9787	0.965511	ErrBox	ErrBox
				49	25.9915	1.22299	8.85	24.1376
				50	26.0044	0.965507	9.15	24.1376
				51	26.0108	1.02988	9.15	25.9401
				52	26.0559	1.15861	8.85	25.9401
				53	26.0559	1.22298	8.85	24.1376
				54	26.0688	0.965498	ErrBox	ErrBox
				55	26.1074	1.09423	9.85	24.1891
				56	26.1103	1.34786	10.15	24.1891
				57	26.1203	1.15859	10.15	26.1203
				58	26.137	1.02722	9.85	26.1203
				59	26.1396	1.09422	9.85	24.1891
				60	26.146	1.09422	ErrBox	ErrBox
				61	26.1846	1.09422	10.85	24.1376
				62	26.1846	1.09422	11.15	24.1376
				63	26.2297	1.09421	11.15	26.1976
				64	26.249	1.09421	10.85	26.1976
				65	26.249	1.15857	10.85	24.1376
				66	26.2499	1.2842	ErrBox	ErrBox
				67	26.2619	1.0942	11.85	24.2084
				68	26.2804	1.09176	12.15	24.2084
				69	26.2876	1.0942	12.15	26.1397
				70	26.2953	0.962914	11.85	26.1397
				71	26.3005	1.09421	11.85	24.2084
				72	26.3134	1.15856	ErrBox	ErrBox
				73	26.3134	1.15857	12.85	24.1247
				74	26.3134	1.22294	13.15	24.1247
				75	26.3391	0.965458	13.15	26.3135
				76	26.3584	1.0942	12.85	26.3135
				77	26.3715	1.09127	12.85	24.1247
				78	26.3777	1.15855	ErrBox	ErrBox
				79	26.3777	1.09418	13.85	24.2342
				80	26.4099	1.09418	14.15	24.2342
				81	26.4421	1.09418	14.15	26.4229
				82	26.4421	1.41603	13.85	26.4229
				83	26.4614	1.09418	13.85	24.2342
				84	26.5064	1.09417	ErrBox	ErrBox
				85	26.5129	1.02981	14.85	24.4209
				86	26.5386	0.965427	15.15	24.4209
				87	26.5451	1.02979	15.15	26.352
				88	26.5644	1.09415	14.85	26.352
				89	26.5708	1.15852	14.85	24.4209
				90	26.5708	1.28726	ErrBox	ErrBox
				91	26.5708	1.15851	15.85	24.2985
				92	26.5708	1.09416	16.15	24.2985
				93	26.603	0.965418	16.15	26.4872
				94	26.6352	1.09414	15.85	26.4872
				95	26.6352	1.09415	15.85	24.2985
				96	26.648	1.02978	ErrBox	ErrBox
				97	26.6962	1.15556	16.85	24.3694
				98	26.6995	1.1585	17.15	24.3694
				99	26.6995	1.15853	17.15	26.4293
				100	26.6995	1.28722	16.85	26.4293
				101	26.6995	1.15849	16.85	24.3694
				102	26.751	1.02976	ErrBox	ErrBox
				103	26.7639	1.15849	17.85	24.2535
				104	26.7639	1.22285	18.15	24.2535
				105	26.8089	1.09411	18.15	26.5709
				106	26.8089	1.09411	17.85	26.5709
				107	26.8283	1.15848	17.85	24.2535
				108	26.8283	1.2872	ErrBox	ErrBox
				109	26.8283	1.15847	18.85	24.3871
				110	26.8283	1.15848	19.15	24.3871
				111	26.8283	1.22283	19.15	26.4415
				112	26.8604	0.96538	18.85	26.4415
				113	26.8739	1.02632	18.85	24.3871
				114	26.8897	1.15557	ErrBox	ErrBox
				115	26.8926	1.28719	19.85	24.408
				116	26.8926	1.28718	20.15	24.408
				117	26.8926	1.15846	20.15	26.4679
				118	26.9377	1.09409	19.85	26.4679
				119	26.9544	1.47656	19.85	24.408
				120	26.957	1.15845	ErrBox	ErrBox
				121	26.957	1.22281	20.85	24.4337
				122	26.9754	1.09144	21.15	24.4337
				123	27.0213	2.3813	21.15	26.4937
				124	27.0213	1.35154	20.85	26.4937
				125	27.0278	1.09408	20.85	24.4337
				126	27.0857	1.16405	ErrBox	ErrBox
				127	27.0857	1.22279	21.85	24.3179
				128	27.0857	1.41587	22.15	24.3179
				129	27.0857	1.15843	22.15	26.6353
				130	27.0857	1.22279	21.85	26.6353
				131	27.15	1.22278	21.85	24.3179
				132	27.15	1.15842	ErrBox	ErrBox
				133	27.15	1.28717	22.85	24.3822
				134	27.1629	1.02969	23.15	24.3822
				135	27.1693	1.02969	23.15	26.5709
				136	27.1758	1.02969	22.85	26.5709
				137	27.2144	1.22277	22.85	24.3822
				138	27.2478	1.02705	ErrBox	ErrBox
				139	27.2493	1.02711	23.85	24.2535
				140	27.2788	1.15839	24.15	24.2535
				141	27.3431	1.02966	24.15	26.6997
				142	27.3431	1.22274	23.85	26.6997
				143	27.3431	1.22275	23.85	24.2535
				144	27.3431	1.2871	ErrBox	ErrBox
				145	27.4075	1.22274	24.85	24.3179
				146	27.4718	1.15836	25.15	24.3179
				147	27.4782	1.15836	25.15	26.6353
				148	27.5104	1.02964	24.85	26.6353
				149	27.5169	1.02964	24.85	24.3179
				150	27.5362	1.35143	ErrBox	ErrBox
				151	27.6005	1.22269	25.85	24.466
				152	27.6584	1.09396	26.15	24.466
				153	27.6649	1.22268	26.15	26.5205
				154	27.6842	1.02961	25.85	26.5205
				155	27.7292	1.28703	25.85	24.466
				156	27.7357	1.09395	ErrBox	ErrBox
				157	27.7871	1.09395	26.85	24.5506
				158	27.7936	1.35141	27.15	24.5506
				159	27.7936	1.28701	27.15	26.4767
				160	27.8257	1.15829	26.85	26.4767
				161	27.8579	1.28699	26.85	24.5506
				162	27.8579	1.41571	ErrBox	ErrBox
				163	27.9223	1.35134	27.85	24.4266
				164	27.9223	1.28698	28.15	24.4266
				165	27.9866	1.15828	28.15	26.61
				166	28.051	2.25219	27.85	26.61
				167	28.051	1.15825	27.85	24.4266
				168	28.1797	1.22259	ErrBox	ErrBox
				169	28.2118	1.15822	28.85	24.5561
				170	28.244	1.28691	29.15	24.5561
				171	28.2504	1.15822	29.15	26.4872
				172	28.3083	1.15821	28.85	26.4872
				173	28.3727	1.15823	28.85	24.5561
				174	28.4177	1.15821	ErrBox	ErrBox
				175	28.7587	1.28681	29.85	24.4981
				176	28.8231	1.15811	30.15	24.4981
				177	29.4021	3.40985	30.15	26.558
				178	29.9168	1.41525	29.85	26.558
				179	30.0454	1.28666	29.85	24.4981
				180	30.8187	1.53106	ErrBox	ErrBox
				181	32.2322	1.60782	30.85	23.9883
				182	34.6754	1.54292	31.15	23.9883
				183	36.8606	1.60668	31.15	27.069
				IsoLine	IsoLine	IsoLine	30.85	27.069
							30.85	23.9883
							ErrBox	ErrBox
							31.85	24.2535
							32.15	24.2535
							32.15	26.8284
							31.85	26.8284
							31.85	24.2535
							ErrBox	ErrBox
							32.85	24.3822
							33.15	24.3822
							33.15	26.6997
							32.85	26.6997
							32.85	24.3822
							ErrBox	ErrBox
							33.85	24.5367
							34.15	24.5367
							34.15	26.5966
							33.85	26.5966
							33.85	24.5367
							ErrBox	ErrBox
							34.85	24.4917
							35.15	24.4917
							35.15	26.6803
							34.85	26.6803
							34.85	24.4917
							ErrBox	ErrBox
							35.85	24.6598
							36.15	24.6598
							36.15	26.586
							35.85	26.586
							35.85	24.6598
							ErrBox	ErrBox
							36.85	24.6884
							37.15	24.6884
							37.15	26.6148
							36.85	26.6148
							36.85	24.6884
							ErrBox	ErrBox
							37.85	24.6333
							38.15	24.6333
							38.15	26.6932
							37.85	26.6932
							37.85	24.6333
							ErrBox	ErrBox
							38.85	24.6526
							39.15	24.6526
							39.15	26.7125
							38.85	26.7125
							38.85	24.6526
							ErrBox	ErrBox
							39.85	24.6913
							40.15	24.6913
							40.15	26.7511
							39.85	26.7511
							39.85	24.6913
							ErrBox	ErrBox
							40.85	24.7041
							41.15	24.7041
							41.15	26.8927
							40.85	26.8927
							40.85	24.7041
							ErrBox	ErrBox
							41.85	24.878
							42.15	24.878
							42.15	26.9377
							41.85	26.9377
							41.85	24.878
							ErrBox	ErrBox
							42.85	24.878
							43.15	24.878
							43.15	26.9377
							42.85	26.9377
							42.85	24.878
							ErrBox	ErrBox
							43.85	24.7685
							44.15	24.7685
							44.15	27.0858
							43.85	27.0858
							43.85	24.7685
							ErrBox	ErrBox
							44.85	24.8973
							45.15	24.8973
							45.15	26.9571
							44.85	26.9571
							44.85	24.8973
							ErrBox	ErrBox
							45.85	24.9101
							46.15	24.9101
							46.15	26.9699
							45.85	26.9699
							45.85	24.9101
							ErrBox	ErrBox
							46.85	24.923
							47.15	24.923
							47.15	26.9828
							46.85	26.9828
							46.85	24.923
							ErrBox	ErrBox
							47.85	25.0131
							48.15	25.0131
							48.15	26.9442
							47.85	26.9442
							47.85	25.0131
							ErrBox	ErrBox
							48.85	24.7685
							49.15	24.7685
							49.15	27.2145
							48.85	27.2145
							48.85	24.7685
							ErrBox	ErrBox
							49.85	25.0389
							50.15	25.0389
							50.15	26.9699
							49.85	26.9699
							49.85	25.0389
							ErrBox	ErrBox
							50.85	24.981
							51.15	24.981
							51.15	27.0407
							50.85	27.0407
							50.85	24.981
							ErrBox	ErrBox
							51.85	24.8973
							52.15	24.8973
							52.15	27.2145
							51.85	27.2145
							51.85	24.8973
							ErrBox	ErrBox
							52.85	24.8329
							53.15	24.8329
							53.15	27.2789
							52.85	27.2789
							52.85	24.8329
							ErrBox	ErrBox
							53.85	25.1033
							54.15	25.1033
							54.15	27.0343
							53.85	27.0343
							53.85	25.1033
							ErrBox	ErrBox
							54.85	25.0132
							55.15	25.0132
							55.15	27.2016
							54.85	27.2016
							54.85	25.0132
							ErrBox	ErrBox
							55.85	24.7624
							56.15	24.7624
							56.15	27.4581
							55.85	27.4581
							55.85	24.7624
							ErrBox	ErrBox
							56.85	24.9617
							57.15	24.9617
							57.15	27.2789
							56.85	27.2789
							56.85	24.9617
							ErrBox	ErrBox
							57.85	25.1097
							58.15	25.1097
							58.15	27.1642
							57.85	27.1642
							57.85	25.1097
							ErrBox	ErrBox
							58.85	25.0454
							59.15	25.0454
							59.15	27.2338
							58.85	27.2338
							58.85	25.0454
							ErrBox	ErrBox
							59.85	25.0518
							60.15	25.0518
							60.15	27.2402
							59.85	27.2402
							59.85	25.0518
							ErrBox	ErrBox
							60.85	25.0904
							61.15	25.0904
							61.15	27.2788
							60.85	27.2788
							60.85	25.0904
							ErrBox	ErrBox
							61.85	25.0904
							62.15	25.0904
							62.15	27.2788
							61.85	27.2788
							61.85	25.0904
							ErrBox	ErrBox
							62.85	25.1355
							63.15	25.1355
							63.15	27.3239
							62.85	27.3239
							62.85	25.1355
							ErrBox	ErrBox
							63.85	25.1548
							64.15	25.1548
							64.15	27.3432
							63.85	27.3432
							63.85	25.1548
							ErrBox	ErrBox
							64.85	25.0904
							65.15	25.0904
							65.15	27.4076
							64.85	27.4076
							64.85	25.0904
							ErrBox	ErrBox
							65.85	24.9657
							66.15	24.9657
							66.15	27.5341
							65.85	27.5341
							65.85	24.9657
							ErrBox	ErrBox
							66.85	25.1677
							67.15	25.1677
							67.15	27.3561
							66.85	27.3561
							66.85	25.1677
							ErrBox	ErrBox
							67.85	25.1886
							68.15	25.1886
							68.15	27.3721
							67.85	27.3721
							67.85	25.1886
							ErrBox	ErrBox
							68.85	25.1934
							69.15	25.1934
							69.15	27.3818
							68.85	27.3818
							68.85	25.1934
							ErrBox	ErrBox
							69.85	25.3324
							70.15	25.3324
							70.15	27.2583
							69.85	27.2583
							69.85	25.3324
							ErrBox	ErrBox
							70.85	25.2063
							71.15	25.2063
							71.15	27.3947
							70.85	27.3947
							70.85	25.2063
							ErrBox	ErrBox
							71.85	25.1548
							72.15	25.1548
							72.15	27.4719
							71.85	27.4719
							71.85	25.1548
							ErrBox	ErrBox
							72.85	25.1548
							73.15	25.1548
							73.15	27.4719
							72.85	27.4719
							72.85	25.1548
							ErrBox	ErrBox
							73.85	25.0904
							74.15	25.0904
							74.15	27.5363
							73.85	27.5363
							73.85	25.0904
							ErrBox	ErrBox
							74.85	25.3736
							75.15	25.3736
							75.15	27.3046
							74.85	27.3046
							74.85	25.3736
							ErrBox	ErrBox
							75.85	25.2642
							76.15	25.2642
							76.15	27.4526
							75.85	27.4526
							75.85	25.2642
							ErrBox	ErrBox
							76.85	25.2803
							77.15	25.2803
							77.15	27.4628
							76.85	27.4628
							76.85	25.2803
							ErrBox	ErrBox
							77.85	25.2192
							78.15	25.2192
							78.15	27.5363
							77.85	27.5363
							77.85	25.2192
							ErrBox	ErrBox
							78.85	25.2835
							79.15	25.2835
							79.15	27.4719
							78.85	27.4719
							78.85	25.2835
							ErrBox	ErrBox
							79.85	25.3157
							80.15	25.3157
							80.15	27.5041
							79.85	27.5041
							79.85	25.3157
							ErrBox	ErrBox
							80.85	25.3479
							81.15	25.3479
							81.15	27.5363
							80.85	27.5363
							80.85	25.3479
							ErrBox	ErrBox
							81.85	25.0261
							82.15	25.0261
							82.15	27.8581
							81.85	27.8581
							81.85	25.0261
							ErrBox	ErrBox
							82.85	25.3672
							83.15	25.3672
							83.15	27.5556
							82.85	27.5556
							82.85	25.3672
							ErrBox	ErrBox
							83.85	25.4123
							84.15	25.4123
							84.15	27.6006
							83.85	27.6006
							83.85	25.4123
							ErrBox	ErrBox
							84.85	25.4831
							85.15	25.4831
							85.15	27.5427
							84.85	27.5427
							84.85	25.4831
							ErrBox	ErrBox
							85.85	25.5732
							86.15	25.5732
							86.15	27.5041
							85.85	27.5041
							85.85	25.5732
							ErrBox	ErrBox
							86.85	25.5153
							87.15	25.5153
							87.15	27.5749
							86.85	27.5749
							86.85	25.5153
							ErrBox	ErrBox
							87.85	25.4702
							88.15	25.4702
							88.15	27.6585
							87.85	27.6585
							87.85	25.4702
							ErrBox	ErrBox
							88.85	25.4123
							89.15	25.4123
							89.15	27.7293
							88.85	27.7293
							88.85	25.4123
							ErrBox	ErrBox
							89.85	25.2836
							90.15	25.2836
							90.15	27.8581
							89.85	27.8581
							89.85	25.2836
							ErrBox	ErrBox
							90.85	25.4123
							91.15	25.4123
							91.15	27.7293
							90.85	27.7293
							90.85	25.4123
							ErrBox	ErrBox
							91.85	25.4767
							92.15	25.4767
							92.15	27.665
							91.85	27.665
							91.85	25.4767
							ErrBox	ErrBox
							92.85	25.6376
							93.15	25.6376
							93.15	27.5684
							92.85	27.5684
							92.85	25.6376
							ErrBox	ErrBox
							93.85	25.541
							94.15	25.541
							94.15	27.7293
							93.85	27.7293
							93.85	25.541
							ErrBox	ErrBox
							94.85	25.541
							95.15	25.541
							95.15	27.7293
							94.85	27.7293
							94.85	25.541
							ErrBox	ErrBox
							95.85	25.6183
							96.15	25.6183
							96.15	27.6778
							95.85	27.6778
							95.85	25.6183
							ErrBox	ErrBox
							96.85	25.5406
							97.15	25.5406
							97.15	27.8518
							96.85	27.8518
							96.85	25.5406
							ErrBox	ErrBox
							97.85	25.541
							98.15	25.541
							98.15	27.858
							97.85	27.858
							97.85	25.541
							ErrBox	ErrBox
							98.85	25.541
							99.15	25.541
							99.15	27.8581
							98.85	27.8581
							98.85	25.541
							ErrBox	ErrBox
							99.85	25.4123
							100.15	25.4123
							100.15	27.9868
							99.85	27.9868
							99.85	25.4123
							ErrBox	ErrBox
							100.85	25.541
							101.15	25.541
							101.15	27.858
							100.85	27.858
							100.85	25.541
							ErrBox	ErrBox
							101.85	25.7213
							102.15	25.7213
							102.15	27.7808
							101.85	27.7808
							101.85	25.7213
							ErrBox	ErrBox
							102.85	25.6054
							103.15	25.6054
							103.15	27.9224
							102.85	27.9224
							102.85	25.6054
							ErrBox	ErrBox
							103.85	25.541
							104.15	25.541
							104.15	27.9867
							103.85	27.9867
							103.85	25.541
							ErrBox	ErrBox
							104.85	25.7148
							105.15	25.7148
							105.15	27.9031
							104.85	27.9031
							104.85	25.7148
							ErrBox	ErrBox
							105.85	25.7148
							106.15	25.7148
							106.15	27.9031
							105.85	27.9031
							105.85	25.7148
							ErrBox	ErrBox
							106.85	25.6698
							107.15	25.6698
							107.15	27.9867
							106.85	27.9867
							106.85	25.6698
							ErrBox	ErrBox
							107.85	25.5411
							108.15	25.5411
							108.15	28.1155
							107.85	28.1155
							107.85	25.5411
							ErrBox	ErrBox
							108.85	25.6698
							109.15	25.6698
							109.15	27.9867
							108.85	27.9867
							108.85	25.6698
							ErrBox	ErrBox
							109.85	25.6698
							110.15	25.6698
							110.15	27.9867
							109.85	27.9867
							109.85	25.6698
							ErrBox	ErrBox
							110.85	25.6054
							111.15	25.6054
							111.15	28.0511
							110.85	28.0511
							110.85	25.6054
							ErrBox	ErrBox
							111.85	25.8951
							112.15	25.8951
							112.15	27.8258
							111.85	27.8258
							111.85	25.8951
							ErrBox	ErrBox
							112.85	25.8476
							113.15	25.8476
							113.15	27.9002
							112.85	27.9002
							112.85	25.8476
							ErrBox	ErrBox
							113.85	25.7341
							114.15	25.7341
							114.15	28.0452
							113.85	28.0452
							113.85	25.7341
							ErrBox	ErrBox
							114.85	25.6054
							115.15	25.6054
							115.15	28.1798
							114.85	28.1798
							114.85	25.6054
							ErrBox	ErrBox
							115.85	25.6054
							116.15	25.6054
							116.15	28.1798
							115.85	28.1798
							115.85	25.6054
							ErrBox	ErrBox
							116.85	25.7342
							117.15	25.7342
							117.15	28.0511
							116.85	28.0511
							116.85	25.7342
							ErrBox	ErrBox
							117.85	25.8436
							118.15	25.8436
							118.15	28.0317
							117.85	28.0317
							117.85	25.8436
							ErrBox	ErrBox
							118.85	25.4779
							119.15	25.4779
							119.15	28.431
							118.85	28.431
							118.85	25.4779
							ErrBox	ErrBox
							119.85	25.7985
							120.15	25.7985
							120.15	28.1154
							119.85	28.1154
							119.85	25.7985
							ErrBox	ErrBox
							120.85	25.7342
							121.15	25.7342
							121.15	28.1798
							120.85	28.1798
							120.85	25.7342
							ErrBox	ErrBox
							121.85	25.884
							122.15	25.884
							122.15	28.0669
							121.85	28.0669
							121.85	25.884
							ErrBox	ErrBox
							122.85	24.64
							123.15	24.64
							123.15	29.4026
							122.85	29.4026
							122.85	24.64
							ErrBox	ErrBox
							123.85	25.6698
							124.15	25.6698
							124.15	28.3729
							123.85	28.3729
							123.85	25.6698
							ErrBox	ErrBox
							124.85	25.9337
							125.15	25.9337
							125.15	28.1218
							124.85	28.1218
							124.85	25.9337
							ErrBox	ErrBox
							125.85	25.9216
							126.15	25.9216
							126.15	28.2497
							125.85	28.2497
							125.85	25.9216
							ErrBox	ErrBox
							126.85	25.8629
							127.15	25.8629
							127.15	28.3085
							126.85	28.3085
							126.85	25.8629
							ErrBox	ErrBox
							127.85	25.6698
							128.15	25.6698
							128.15	28.5016
							127.85	28.5016
							127.85	25.6698
							ErrBox	ErrBox
							128.85	25.9273
							129.15	25.9273
							129.15	28.2441
							128.85	28.2441
							128.85	25.9273
							ErrBox	ErrBox
							129.85	25.8629
							130.15	25.8629
							130.15	28.3085
							129.85	28.3085
							129.85	25.8629
							ErrBox	ErrBox
							130.85	25.9273
							131.15	25.9273
							131.15	28.3728
							130.85	28.3728
							130.85	25.9273
							ErrBox	ErrBox
							131.85	25.9916
							132.15	25.9916
							132.15	28.3085
							131.85	28.3085
							131.85	25.9916
							ErrBox	ErrBox
							132.85	25.8629
							133.15	25.8629
							133.15	28.4372
							132.85	28.4372
							132.85	25.8629
							ErrBox	ErrBox
							133.85	26.1332
							134.15	26.1332
							134.15	28.1926
							133.85	28.1926
							133.85	26.1332
							ErrBox	ErrBox
							134.85	26.1397
							135.15	26.1397
							135.15	28.199
							134.85	28.199
							134.85	26.1397
							ErrBox	ErrBox
							135.85	26.1461
							136.15	26.1461
							136.15	28.2055
							135.85	28.2055
							135.85	26.1461
							ErrBox	ErrBox
							136.85	25.9916
							137.15	25.9916
							137.15	28.4372
							136.85	28.4372
							136.85	25.9916
							ErrBox	ErrBox
							137.85	26.2208
							138.15	26.2208
							138.15	28.2749
							137.85	28.2749
							137.85	26.2208
							ErrBox	ErrBox
							138.85	26.2222
							139.15	26.2222
							139.15	28.2764
							138.85	28.2764
							138.85	26.2222
							ErrBox	ErrBox
							139.85	26.1204
							140.15	26.1204
							140.15	28.4371
							139.85	28.4371
							139.85	26.1204
							ErrBox	ErrBox
							140.85	26.3134
							141.15	26.3134
							141.15	28.3728
							140.85	28.3728
							140.85	26.3134
							ErrBox	ErrBox
							141.85	26.1204
							142.15	26.1204
							142.15	28.5658
							141.85	28.5658
							141.85	26.1204
							ErrBox	ErrBox
							142.85	26.1204
							143.15	26.1204
							143.15	28.5659
							142.85	28.5659
							142.85	26.1204
							ErrBox	ErrBox
							143.85	26.056
							144.15	26.056
							144.15	28.6302
							143.85	28.6302
							143.85	26.056
							ErrBox	ErrBox
							144.85	26.1847
							145.15	26.1847
							145.15	28.6302
							144.85	28.6302
							144.85	26.1847
							ErrBox	ErrBox
							145.85	26.3135
							146.15	26.3135
							146.15	28.6302
							145.85	28.6302
							145.85	26.3135
							ErrBox	ErrBox
							146.85	26.3199
							147.15	26.3199
							147.15	28.6366
							146.85	28.6366
							146.85	26.3199
							ErrBox	ErrBox
							147.85	26.4808
							148.15	26.4808
							148.15	28.5401
							147.85	28.5401
							147.85	26.4808
							ErrBox	ErrBox
							148.85	26.4872
							149.15	26.4872
							149.15	28.5465
							148.85	28.5465
							148.85	26.4872
							ErrBox	ErrBox
							149.85	26.1847
							150.15	26.1847
							150.15	28.8876
							149.85	28.8876
							149.85	26.1847
							ErrBox	ErrBox
							150.85	26.3778
							151.15	26.3778
							151.15	28.8232
							150.85	28.8232
							150.85	26.3778
							ErrBox	ErrBox
							151.85	26.5645
							152.15	26.5645
							152.15	28.7524
							151.85	28.7524
							151.85	26.5645
							ErrBox	ErrBox
							152.85	26.4422
							153.15	26.4422
							153.15	28.8875
							152.85	28.8875
							152.85	26.4422
							ErrBox	ErrBox
							153.85	26.6546
							154.15	26.6546
							154.15	28.7138
							153.85	28.7138
							153.85	26.6546
							ErrBox	ErrBox
							154.85	26.4422
							155.15	26.4422
							155.15	29.0163
							154.85	29.0163
							154.85	26.4422
							ErrBox	ErrBox
							155.85	26.6417
							156.15	26.6417
							156.15	28.8296
							155.85	28.8296
							155.85	26.6417
							ErrBox	ErrBox
							156.85	26.6932
							157.15	26.6932
							157.15	28.8811
							156.85	28.8811
							156.85	26.6932
							ErrBox	ErrBox
							157.85	26.4422
							158.15	26.4422
							158.15	29.145
							157.85	29.145
							157.85	26.4422
							ErrBox	ErrBox
							158.85	26.5066
							159.15	26.5066
							159.15	29.0806
							158.85	29.0806
							158.85	26.5066
							ErrBox	ErrBox
							159.85	26.6675
							160.15	26.6675
							160.15	28.984
							159.85	28.984
							159.85	26.6675
							ErrBox	ErrBox
							160.85	26.5709
							161.15	26.5709
							161.15	29.1449
							160.85	29.1449
							160.85	26.5709
							ErrBox	ErrBox
							161.85	26.4422
							162.15	26.4422
							162.15	29.2736
							161.85	29.2736
							161.85	26.4422
							ErrBox	ErrBox
							162.85	26.5709
							163.15	26.5709
							163.15	29.2736
							162.85	29.2736
							162.85	26.5709
							ErrBox	ErrBox
							163.85	26.6353
							164.15	26.6353
							164.15	29.2092
							163.85	29.2092
							163.85	26.6353
							ErrBox	ErrBox
							164.85	26.8283
							165.15	26.8283
							165.15	29.1449
							164.85	29.1449
							164.85	26.8283
							ErrBox	ErrBox
							165.85	25.7988
							166.15	25.7988
							166.15	30.3031
							165.85	30.3031
							165.85	25.7988
							ErrBox	ErrBox
							166.85	26.8927
							167.15	26.8927
							167.15	29.2092
							166.85	29.2092
							166.85	26.8927
							ErrBox	ErrBox
							167.85	26.9571
							168.15	26.9571
							168.15	29.4022
							167.85	29.4022
							167.85	26.9571
							ErrBox	ErrBox
							168.85	27.0536
							169.15	27.0536
							169.15	29.37
							168.85	29.37
							168.85	27.0536
							ErrBox	ErrBox
							169.85	26.9571
							170.15	26.9571
							170.15	29.5309
							169.85	29.5309
							169.85	26.9571
							ErrBox	ErrBox
							170.85	27.0922
							171.15	27.0922
							171.15	29.4087
							170.85	29.4087
							170.85	27.0922
							ErrBox	ErrBox
							171.85	27.1501
							172.15	27.1501
							172.15	29.4666
							171.85	29.4666
							171.85	27.1501
							ErrBox	ErrBox
							172.85	27.2145
							173.15	27.2145
							173.15	29.5309
							172.85	29.5309
							172.85	27.2145
							ErrBox	ErrBox
							173.85	27.2595
							174.15	27.2595
							174.15	29.5759
							173.85	29.5759
							173.85	27.2595
							ErrBox	ErrBox
							174.85	27.4719
							175.15	27.4719
							175.15	30.0455
							174.85	30.0455
							174.85	27.4719
							ErrBox	ErrBox
							175.85	27.665
							176.15	27.665
							176.15	29.9812
							175.85	29.9812
							175.85	27.665
							ErrBox	ErrBox
							176.85	25.9923
							177.15	25.9923
							177.15	32.812
							176.85	32.812
							176.85	25.9923
							ErrBox	ErrBox
							177.85	28.5015
							178.15	28.5015
							178.15	31.332
							177.85	31.332
							177.85	28.5015
							ErrBox	ErrBox
							178.85	28.7588
							179.15	28.7588
							179.15	31.3321
							178.85	31.3321
							178.85	28.7588
							ErrBox	ErrBox
							179.85	29.2876
							180.15	29.2876
							180.15	32.3497
							179.85	32.3497
							179.85	29.2876
							ErrBox	ErrBox
							180.85	30.6244
							181.15	30.6244
							181.15	33.84
							180.85	33.84
							180.85	30.6244
							ErrBox	ErrBox
							181.85	33.1324
							182.15	33.1324
							182.15	36.2183
							181.85	36.2183
							181.85	33.1324
							ErrBox	ErrBox
							182.85	35.2539
							183.15	35.2539
							183.15	38.4673
							182.85	38.4673
							182.85	35.2539
							ErrBox	ErrBox

## Sheet: PlotDat5
Source sheet	data_isoplot	0.2	24.7743	1	24.2488	1.66932	0.85	22.5795
Plot name	Average2	9.8	24.7743	2	24.3564	0.965752	1.15	22.5795
Plot Type	15			3	24.5946	0.965718	1.15	25.9182
1st free col	8			4	24.7449	1.02749	0.85	25.9182
Sigma Level	2			5	24.7813	0.965692	0.85	22.5795
Absolute Errs	TRUE			6	24.9744	1.03005	ErrBox	ErrBox
Symbol Type	1			7	25.0195	0.965655	1.85	23.3906
Inverse Plot	FALSE			8	25.0259	1.86729	2.15	23.3906
Color Plot	TRUE			9	25.0388	0.901273	2.15	25.3221
3D plot	FALSE			IsoLine	IsoLine	IsoLine	1.85	25.3221
Linear	FALSE						1.85	23.3906
Data Range	Q7:R15						ErrBox	ErrBox
Filled Symbols	TRUE						2.85	23.6289
ConcAge	FALSE						3.15	23.6289
ConcSwap	FALSE						3.15	25.5603
1st Symbol-row	1						2.85	25.5603
							2.85	23.6289
							ErrBox	ErrBox
							3.85	23.7174
							4.15	23.7174
							4.15	25.7723
							3.85	25.7723
							3.85	23.7174
							ErrBox	ErrBox
							4.85	23.8156
							5.15	23.8156
							5.15	25.747
							4.85	25.747
							4.85	23.8156
							ErrBox	ErrBox
							5.85	23.9444
							6.15	23.9444
							6.15	26.0045
							5.85	26.0045
							5.85	23.9444
							ErrBox	ErrBox
							6.85	24.0539
							7.15	24.0539
							7.15	25.9852
							6.85	25.9852
							6.85	24.0539
							ErrBox	ErrBox
							7.85	23.1587
							8.15	23.1587
							8.15	26.8932
							7.85	26.8932
							7.85	23.1587
							ErrBox	ErrBox
							8.85	24.1376
							9.15	24.1376
							9.15	25.9401
							8.85	25.9401
							8.85	24.1376
							ErrBox	ErrBox

## Sheet: PlotDat6
Source sheet	data_isoplot	0.2	25.0755	1	24.2488	1.66932	0.85	22.5795
Plot name	Average3	20.8	25.0755	2	24.3564	0.965752	1.15	22.5795
Plot Type	15			3	24.5946	0.965718	1.15	25.9182
1st free col	8			4	24.7449	1.02749	0.85	25.9182
Sigma Level	2			5	24.7813	0.965692	0.85	22.5795
Absolute Errs	TRUE			6	24.9744	1.03005	ErrBox	ErrBox
Symbol Type	1			7	25.0195	0.965655	1.85	23.3906
Inverse Plot	FALSE			8	25.0259	1.86729	2.15	23.3906
Color Plot	TRUE			9	25.0388	0.901273	2.15	25.3221
3D plot	FALSE			10	25.1547	0.965635	1.85	25.3221
Linear	FALSE			11	25.1676	1.03001	1.85	23.3906
Data Range	Q7:R26			12	25.174	0.965637	ErrBox	ErrBox
Filled Symbols	TRUE			13	25.2191	1.09438	2.85	23.6289
ConcAge	FALSE			14	25.3285	1.09436	3.15	23.6289
ConcSwap	FALSE			15	25.3865	0.965599	3.15	25.5603
1st Symbol-row	1			16	25.3929	1.09436	2.85	25.5603
				17	25.3993	1.02997	2.85	23.6289
				18	25.4122	1.15872	ErrBox	ErrBox
				19	25.4143	1.02719	3.85	23.7174
				20	25.4379	1.02997	4.15	23.7174
				IsoLine	IsoLine	IsoLine	4.15	25.7723
							3.85	25.7723
							3.85	23.7174
							ErrBox	ErrBox
							4.85	23.8156
							5.15	23.8156
							5.15	25.747
							4.85	25.747
							4.85	23.8156
							ErrBox	ErrBox
							5.85	23.9444
							6.15	23.9444
							6.15	26.0045
							5.85	26.0045
							5.85	23.9444
							ErrBox	ErrBox
							6.85	24.0539
							7.15	24.0539
							7.15	25.9852
							6.85	25.9852
							6.85	24.0539
							ErrBox	ErrBox
							7.85	23.1587
							8.15	23.1587
							8.15	26.8932
							7.85	26.8932
							7.85	23.1587
							ErrBox	ErrBox
							8.85	24.1376
							9.15	24.1376
							9.15	25.9401
							8.85	25.9401
							8.85	24.1376
							ErrBox	ErrBox
							9.85	24.1891
							10.15	24.1891
							10.15	26.1203
							9.85	26.1203
							9.85	24.1891
							ErrBox	ErrBox
							10.85	24.1376
							11.15	24.1376
							11.15	26.1976
							10.85	26.1976
							10.85	24.1376
							ErrBox	ErrBox
							11.85	24.2084
							12.15	24.2084
							12.15	26.1397
							11.85	26.1397
							11.85	24.2084
							ErrBox	ErrBox
							12.85	24.1247
							13.15	24.1247
							13.15	26.3135
							12.85	26.3135
							12.85	24.1247
							ErrBox	ErrBox
							13.85	24.2342
							14.15	24.2342
							14.15	26.4229
							13.85	26.4229
							13.85	24.2342
							ErrBox	ErrBox
							14.85	24.4209
							15.15	24.4209
							15.15	26.352
							14.85	26.352
							14.85	24.4209
							ErrBox	ErrBox
							15.85	24.2985
							16.15	24.2985
							16.15	26.4872
							15.85	26.4872
							15.85	24.2985
							ErrBox	ErrBox
							16.85	24.3694
							17.15	24.3694
							17.15	26.4293
							16.85	26.4293
							16.85	24.3694
							ErrBox	ErrBox
							17.85	24.2535
							18.15	24.2535
							18.15	26.5709
							17.85	26.5709
							17.85	24.2535
							ErrBox	ErrBox
							18.85	24.3871
							19.15	24.3871
							19.15	26.4415
							18.85	26.4415
							18.85	24.3871
							ErrBox	ErrBox
							19.85	24.408
							20.15	24.408
							20.15	26.4679
							19.85	26.4679
							19.85	24.408
							ErrBox	ErrBox

## Sheet: PlotDat7
Source sheet	data_isoplot	0.2	25.81	1	24.2488	1.66932	0.85	22.5795
Plot name	Average4	91.8	25.81	2	24.3564	0.965752	1.15	22.5795
Plot Type	15			3	24.5946	0.965718	1.15	25.9182
1st free col	8			4	24.7449	1.02749	0.85	25.9182
Sigma Level	2			5	24.7813	0.965692	0.85	22.5795
Absolute Errs	TRUE			6	24.9744	1.03005	ErrBox	ErrBox
Symbol Type	1			7	25.0195	0.965655	1.85	23.3906
Inverse Plot	FALSE			8	25.0259	1.86729	2.15	23.3906
Color Plot	TRUE			9	25.0388	0.901273	2.15	25.3221
3D plot	FALSE			10	25.1547	0.965635	1.85	25.3221
Linear	FALSE			11	25.1676	1.03001	1.85	23.3906
Data Range	Q7:R97			12	25.174	0.965637	ErrBox	ErrBox
Filled Symbols	TRUE			13	25.2191	1.09438	2.85	23.6289
ConcAge	FALSE			14	25.3285	1.09436	3.15	23.6289
ConcSwap	FALSE			15	25.3865	0.965599	3.15	25.5603
1st Symbol-row	1			16	25.3929	1.09436	2.85	25.5603
				17	25.3993	1.02997	2.85	23.6289
				18	25.4122	1.15872	ErrBox	ErrBox
				19	25.4143	1.02719	3.85	23.7174
				20	25.4379	1.02997	4.15	23.7174
				21	25.4637	1.02996	4.15	25.7723
				22	25.4766	1.15872	3.85	25.7723
				23	25.4766	1.09434	3.85	23.7174
				24	25.4766	1.22308	ErrBox	ErrBox
				25	25.4766	1.15872	4.85	23.8156
				26	25.4933	1.02726	5.15	23.8156
				27	25.5136	0.963088	5.15	25.747
				28	25.5183	1.0917	4.85	25.747
				29	25.5216	0.965578	4.85	23.8156
				30	25.5281	1.02995	ErrBox	ErrBox
				31	25.5286	1.54036	5.85	23.9444
				32	25.5409	1.28746	6.15	23.9444
				33	25.5409	1.15871	6.15	26.0045
				34	25.5667	1.02994	5.85	26.0045
				35	25.586	1.09433	5.85	23.9444
				36	25.6229	0.963075	ErrBox	ErrBox
				37	25.6516	0.963187	6.85	24.0539
				38	25.6632	1.02993	7.15	24.0539
				39	25.6826	1.02993	7.15	25.9852
				40	25.7212	1.02992	6.85	25.9852
				41	25.7984	1.09428	6.85	24.0539
				42	25.9079	1.02989	ErrBox	ErrBox
				43	25.9079	1.02989	7.85	23.1587
				44	25.9272	1.15863	8.15	23.1587
				45	25.9272	1.02989	8.15	26.8932
				46	25.94	1.02989	7.85	26.8932
				47	25.9529	1.02989	7.85	23.1587
				48	25.9787	0.965511	ErrBox	ErrBox
				49	25.9915	1.22299	8.85	24.1376
				50	26.0044	0.965507	9.15	24.1376
				51	26.0108	1.02988	9.15	25.9401
				52	26.0559	1.15861	8.85	25.9401
				53	26.0559	1.22298	8.85	24.1376
				54	26.0688	0.965498	ErrBox	ErrBox
				55	26.1074	1.09423	9.85	24.1891
				56	26.1103	1.34786	10.15	24.1891
				57	26.1203	1.15859	10.15	26.1203
				58	26.137	1.02722	9.85	26.1203
				59	26.1396	1.09422	9.85	24.1891
				60	26.146	1.09422	ErrBox	ErrBox
				61	26.1846	1.09422	10.85	24.1376
				62	26.1846	1.09422	11.15	24.1376
				63	26.2297	1.09421	11.15	26.1976
				64	26.249	1.09421	10.85	26.1976
				65	26.249	1.15857	10.85	24.1376
				66	26.2499	1.2842	ErrBox	ErrBox
				67	26.2619	1.0942	11.85	24.2084
				68	26.2804	1.09176	12.15	24.2084
				69	26.2876	1.0942	12.15	26.1397
				70	26.2953	0.962914	11.85	26.1397
				71	26.3005	1.09421	11.85	24.2084
				72	26.3134	1.15856	ErrBox	ErrBox
				73	26.3134	1.15857	12.85	24.1247
				74	26.3134	1.22294	13.15	24.1247
				75	26.3391	0.965458	13.15	26.3135
				76	26.3584	1.0942	12.85	26.3135
				77	26.3715	1.09127	12.85	24.1247
				78	26.3777	1.15855	ErrBox	ErrBox
				79	26.3777	1.09418	13.85	24.2342
				80	26.4099	1.09418	14.15	24.2342
				81	26.4421	1.09418	14.15	26.4229
				82	26.4421	1.41603	13.85	26.4229
				83	26.4614	1.09418	13.85	24.2342
				84	26.5064	1.09417	ErrBox	ErrBox
				85	26.5129	1.02981	14.85	24.4209
				86	26.5386	0.965427	15.15	24.4209
				87	26.5451	1.02979	15.15	26.352
				88	26.5644	1.09415	14.85	26.352
				89	26.5708	1.15852	14.85	24.4209
				90	26.5708	1.28726	ErrBox	ErrBox
				91	26.5708	1.15851	15.85	24.2985
				IsoLine	IsoLine	IsoLine	16.15	24.2985
							16.15	26.4872
							15.85	26.4872
							15.85	24.2985
							ErrBox	ErrBox
							16.85	24.3694
							17.15	24.3694
							17.15	26.4293
							16.85	26.4293
							16.85	24.3694
							ErrBox	ErrBox
							17.85	24.2535
							18.15	24.2535
							18.15	26.5709
							17.85	26.5709
							17.85	24.2535
							ErrBox	ErrBox
							18.85	24.3871
							19.15	24.3871
							19.15	26.4415
							18.85	26.4415
							18.85	24.3871
							ErrBox	ErrBox
							19.85	24.408
							20.15	24.408
							20.15	26.4679
							19.85	26.4679
							19.85	24.408
							ErrBox	ErrBox
							20.85	24.4337
							21.15	24.4337
							21.15	26.4937
							20.85	26.4937
							20.85	24.4337
							ErrBox	ErrBox
							21.85	24.3179
							22.15	24.3179
							22.15	26.6353
							21.85	26.6353
							21.85	24.3179
							ErrBox	ErrBox
							22.85	24.3822
							23.15	24.3822
							23.15	26.5709
							22.85	26.5709
							22.85	24.3822
							ErrBox	ErrBox
							23.85	24.2535
							24.15	24.2535
							24.15	26.6997
							23.85	26.6997
							23.85	24.2535
							ErrBox	ErrBox
							24.85	24.3179
							25.15	24.3179
							25.15	26.6353
							24.85	26.6353
							24.85	24.3179
							ErrBox	ErrBox
							25.85	24.466
							26.15	24.466
							26.15	26.5205
							25.85	26.5205
							25.85	24.466
							ErrBox	ErrBox
							26.85	24.5506
							27.15	24.5506
							27.15	26.4767
							26.85	26.4767
							26.85	24.5506
							ErrBox	ErrBox
							27.85	24.4266
							28.15	24.4266
							28.15	26.61
							27.85	26.61
							27.85	24.4266
							ErrBox	ErrBox
							28.85	24.5561
							29.15	24.5561
							29.15	26.4872
							28.85	26.4872
							28.85	24.5561
							ErrBox	ErrBox
							29.85	24.4981
							30.15	24.4981
							30.15	26.558
							29.85	26.558
							29.85	24.4981
							ErrBox	ErrBox
							30.85	23.9883
							31.15	23.9883
							31.15	27.069
							30.85	27.069
							30.85	23.9883
							ErrBox	ErrBox
							31.85	24.2535
							32.15	24.2535
							32.15	26.8284
							31.85	26.8284
							31.85	24.2535
							ErrBox	ErrBox
							32.85	24.3822
							33.15	24.3822
							33.15	26.6997
							32.85	26.6997
							32.85	24.3822
							ErrBox	ErrBox
							33.85	24.5367
							34.15	24.5367
							34.15	26.5966
							33.85	26.5966
							33.85	24.5367
							ErrBox	ErrBox
							34.85	24.4917
							35.15	24.4917
							35.15	26.6803
							34.85	26.6803
							34.85	24.4917
							ErrBox	ErrBox
							35.85	24.6598
							36.15	24.6598
							36.15	26.586
							35.85	26.586
							35.85	24.6598
							ErrBox	ErrBox
							36.85	24.6884
							37.15	24.6884
							37.15	26.6148
							36.85	26.6148
							36.85	24.6884
							ErrBox	ErrBox
							37.85	24.6333
							38.15	24.6333
							38.15	26.6932
							37.85	26.6932
							37.85	24.6333
							ErrBox	ErrBox
							38.85	24.6526
							39.15	24.6526
							39.15	26.7125
							38.85	26.7125
							38.85	24.6526
							ErrBox	ErrBox
							39.85	24.6913
							40.15	24.6913
							40.15	26.7511
							39.85	26.7511
							39.85	24.6913
							ErrBox	ErrBox
							40.85	24.7041
							41.15	24.7041
							41.15	26.8927
							40.85	26.8927
							40.85	24.7041
							ErrBox	ErrBox
							41.85	24.878
							42.15	24.878
							42.15	26.9377
							41.85	26.9377
							41.85	24.878
							ErrBox	ErrBox
							42.85	24.878
							43.15	24.878
							43.15	26.9377
							42.85	26.9377
							42.85	24.878
							ErrBox	ErrBox
							43.85	24.7685
							44.15	24.7685
							44.15	27.0858
							43.85	27.0858
							43.85	24.7685
							ErrBox	ErrBox
							44.85	24.8973
							45.15	24.8973
							45.15	26.9571
							44.85	26.9571
							44.85	24.8973
							ErrBox	ErrBox
							45.85	24.9101
							46.15	24.9101
							46.15	26.9699
							45.85	26.9699
							45.85	24.9101
							ErrBox	ErrBox
							46.85	24.923
							47.15	24.923
							47.15	26.9828
							46.85	26.9828
							46.85	24.923
							ErrBox	ErrBox
							47.85	25.0131
							48.15	25.0131
							48.15	26.9442
							47.85	26.9442
							47.85	25.0131
							ErrBox	ErrBox
							48.85	24.7685
							49.15	24.7685
							49.15	27.2145
							48.85	27.2145
							48.85	24.7685
							ErrBox	ErrBox
							49.85	25.0389
							50.15	25.0389
							50.15	26.9699
							49.85	26.9699
							49.85	25.0389
							ErrBox	ErrBox
							50.85	24.981
							51.15	24.981
							51.15	27.0407
							50.85	27.0407
							50.85	24.981
							ErrBox	ErrBox
							51.85	24.8973
							52.15	24.8973
							52.15	27.2145
							51.85	27.2145
							51.85	24.8973
							ErrBox	ErrBox
							52.85	24.8329
							53.15	24.8329
							53.15	27.2789
							52.85	27.2789
							52.85	24.8329
							ErrBox	ErrBox
							53.85	25.1033
							54.15	25.1033
							54.15	27.0343
							53.85	27.0343
							53.85	25.1033
							ErrBox	ErrBox
							54.85	25.0132
							55.15	25.0132
							55.15	27.2016
							54.85	27.2016
							54.85	25.0132
							ErrBox	ErrBox
							55.85	24.7624
							56.15	24.7624
							56.15	27.4581
							55.85	27.4581
							55.85	24.7624
							ErrBox	ErrBox
							56.85	24.9617
							57.15	24.9617
							57.15	27.2789
							56.85	27.2789
							56.85	24.9617
							ErrBox	ErrBox
							57.85	25.1097
							58.15	25.1097
							58.15	27.1642
							57.85	27.1642
							57.85	25.1097
							ErrBox	ErrBox
							58.85	25.0454
							59.15	25.0454
							59.15	27.2338
							58.85	27.2338
							58.85	25.0454
							ErrBox	ErrBox
							59.85	25.0518
							60.15	25.0518
							60.15	27.2402
							59.85	27.2402
							59.85	25.0518
							ErrBox	ErrBox
							60.85	25.0904
							61.15	25.0904
							61.15	27.2788
							60.85	27.2788
							60.85	25.0904
							ErrBox	ErrBox
							61.85	25.0904
							62.15	25.0904
							62.15	27.2788
							61.85	27.2788
							61.85	25.0904
							ErrBox	ErrBox
							62.85	25.1355
							63.15	25.1355
							63.15	27.3239
							62.85	27.3239
							62.85	25.1355
							ErrBox	ErrBox
							63.85	25.1548
							64.15	25.1548
							64.15	27.3432
							63.85	27.3432
							63.85	25.1548
							ErrBox	ErrBox
							64.85	25.0904
							65.15	25.0904
							65.15	27.4076
							64.85	27.4076
							64.85	25.0904
							ErrBox	ErrBox
							65.85	24.9657
							66.15	24.9657
							66.15	27.5341
							65.85	27.5341
							65.85	24.9657
							ErrBox	ErrBox
							66.85	25.1677
							67.15	25.1677
							67.15	27.3561
							66.85	27.3561
							66.85	25.1677
							ErrBox	ErrBox
							67.85	25.1886
							68.15	25.1886
							68.15	27.3721
							67.85	27.3721
							67.85	25.1886
							ErrBox	ErrBox
							68.85	25.1934
							69.15	25.1934
							69.15	27.3818
							68.85	27.3818
							68.85	25.1934
							ErrBox	ErrBox
							69.85	25.3324
							70.15	25.3324
							70.15	27.2583
							69.85	27.2583
							69.85	25.3324
							ErrBox	ErrBox
							70.85	25.2063
							71.15	25.2063
							71.15	27.3947
							70.85	27.3947
							70.85	25.2063
							ErrBox	ErrBox
							71.85	25.1548
							72.15	25.1548
							72.15	27.4719
							71.85	27.4719
							71.85	25.1548
							ErrBox	ErrBox
							72.85	25.1548
							73.15	25.1548
							73.15	27.4719
							72.85	27.4719
							72.85	25.1548
							ErrBox	ErrBox
							73.85	25.0904
							74.15	25.0904
							74.15	27.5363
							73.85	27.5363
							73.85	25.0904
							ErrBox	ErrBox
							74.85	25.3736
							75.15	25.3736
							75.15	27.3046
							74.85	27.3046
							74.85	25.3736
							ErrBox	ErrBox
							75.85	25.2642
							76.15	25.2642
							76.15	27.4526
							75.85	27.4526
							75.85	25.2642
							ErrBox	ErrBox
							76.85	25.2803
							77.15	25.2803
							77.15	27.4628
							76.85	27.4628
							76.85	25.2803
							ErrBox	ErrBox
							77.85	25.2192
							78.15	25.2192
							78.15	27.5363
							77.85	27.5363
							77.85	25.2192
							ErrBox	ErrBox
							78.85	25.2835
							79.15	25.2835
							79.15	27.4719
							78.85	27.4719
							78.85	25.2835
							ErrBox	ErrBox
							79.85	25.3157
							80.15	25.3157
							80.15	27.5041
							79.85	27.5041
							79.85	25.3157
							ErrBox	ErrBox
							80.85	25.3479
							81.15	25.3479
							81.15	27.5363
							80.85	27.5363
							80.85	25.3479
							ErrBox	ErrBox
							81.85	25.0261
							82.15	25.0261
							82.15	27.8581
							81.85	27.8581
							81.85	25.0261
							ErrBox	ErrBox
							82.85	25.3672
							83.15	25.3672
							83.15	27.5556
							82.85	27.5556
							82.85	25.3672
							ErrBox	ErrBox
							83.85	25.4123
							84.15	25.4123
							84.15	27.6006
							83.85	27.6006
							83.85	25.4123
							ErrBox	ErrBox
							84.85	25.4831
							85.15	25.4831
							85.15	27.5427
							84.85	27.5427
							84.85	25.4831
							ErrBox	ErrBox
							85.85	25.5732
							86.15	25.5732
							86.15	27.5041
							85.85	27.5041
							85.85	25.5732
							ErrBox	ErrBox
							86.85	25.5153
							87.15	25.5153
							87.15	27.5749
							86.85	27.5749
							86.85	25.5153
							ErrBox	ErrBox
							87.85	25.4702
							88.15	25.4702
							88.15	27.6585
							87.85	27.6585
							87.85	25.4702
							ErrBox	ErrBox
							88.85	25.4123
							89.15	25.4123
							89.15	27.7293
							88.85	27.7293
							88.85	25.4123
							ErrBox	ErrBox
							89.85	25.2836
							90.15	25.2836
							90.15	27.8581
							89.85	27.8581
							89.85	25.2836
							ErrBox	ErrBox
							90.85	25.4123
							91.15	25.4123
							91.15	27.7293
							90.85	27.7293
							90.85	25.4123
							ErrBox	ErrBox

## Sheet: PlotDat9
Source sheet	data_isoplot	20	6.16515e-09	24	0	20	0
Plot name	ProbDens6	20.01	6.55239e-09	24.5	0	39.99	0
Plot Type	16	20.02	6.96296e-09	24.5	2
1st free col	9	20.03	7.39818e-09	24	2
Sigma Level	2	20.04	7.85948e-09	24	0
Absolute Errs	TRUE	20.05	8.34835e-09	ErrBox	ErrBox
Symbol Type	1	20.06	8.86635e-09	24.5	0
Inverse Plot	FALSE	20.07	9.41514e-09	25	0
Color Plot	TRUE	20.08	9.99647e-09	25	4
3D plot	FALSE	20.09	1.06122e-08	24.5	4
Linear	FALSE	20.1	1.12642e-08	24.5	0
Data Range	Q7:R189	20.11	1.19545e-08	ErrBox	ErrBox
Filled Symbols	TRUE	20.12	1.26853e-08	25	0
ConcAge	FALSE	20.13	1.34589e-08	25.5	0
ConcSwap	FALSE	20.14	1.42776e-08	25.5	20
1st Symbol-row	1	20.15	1.51439e-08	25	20
		20.16	1.60605e-08	25	0
		20.17	1.70301e-08	ErrBox	ErrBox
		20.18	1.80557e-08	25.5	0
		20.19	1.91403e-08	26	0
		20.2	2.02871e-08	26	23
		20.21	2.14995e-08	25.5	23
		20.22	2.27812e-08	25.5	0
		20.23	2.41357e-08	ErrBox	ErrBox
		20.24	2.55672e-08	26	0
		20.25	2.70796e-08	26.5	0
		20.26	2.86774e-08	26.5	34
		20.27	3.03652e-08	26	34
		20.28	3.78669e-08	26	0
		20.29	4.00688e-08	ErrBox	ErrBox
		20.3	4.23928e-08	26.5	0
		20.31	4.48454e-08	27	0
		20.32	4.74333e-08	27	39
		20.33	5.01636e-08	26.5	39
		20.34	5.30438e-08	26.5	0
		20.35	5.60815e-08	ErrBox	ErrBox
		20.36	5.9285e-08	27	0
		20.37	6.26627e-08	27.5	0
		20.38	6.62238e-08	27.5	25
		20.39	6.99775e-08	27	25
		20.4	7.39337e-08	27	0
		20.41	7.81028e-08	ErrBox	ErrBox
		20.42	8.24955e-08	27.5	0
		20.43	8.71232e-08	28	0
		20.44	9.19977e-08	28	18
		20.45	9.71314e-08	27.5	18
		20.46	1.02537e-07	27.5	0
		20.47	1.08229e-07	ErrBox	ErrBox
		20.48	1.14221e-07	28	0
		20.49	1.20528e-07	28.5	0
		20.5	1.27166e-07	28.5	9
		20.51	1.3415e-07	28	9
		20.52	1.41498e-07	28	0
		20.53	1.49229e-07	ErrBox	ErrBox
		20.54	1.57359e-07	28.5	0
		20.55	1.6591e-07	29	0
		20.56	1.749e-07	29	2
		20.57	1.84353e-07	28.5	2
		20.58	1.94289e-07	28.5	0
		20.59	2.04732e-07	ErrBox	ErrBox
		20.6	2.15707e-07	29	0
		20.61	2.27238e-07	29.5	0
		20.62	2.39353e-07	29.5	1
		20.63	2.52078e-07	29	1
		20.64	2.65442e-07	29	0
		20.65	2.79477e-07	ErrBox	ErrBox
		20.66	2.94212e-07	29.5	0
		20.67	3.09682e-07	30	0
		20.68	3.25919e-07	30	1
		20.69	3.4296e-07	29.5	1
		20.7	3.60842e-07	29.5	0
		20.71	3.79603e-07	ErrBox	ErrBox
		20.72	3.99284e-07	30	0
		20.73	4.19926e-07	30.5	0
		20.74	4.41575e-07	30.5	1
		20.75	4.64275e-07	30	1
		20.76	4.88074e-07	30	0
		20.77	5.13021e-07	ErrBox	ErrBox
		20.78	5.39168e-07	30.5	0
		20.79	5.66569e-07	31	0
		20.8	5.95279e-07	31	1
		20.81	6.25358e-07	30.5	1
		20.82	6.56864e-07	30.5	0
		20.83	6.89861e-07	ErrBox	ErrBox
		20.84	7.24416e-07	32	0
		20.85	7.60594e-07	32.5	0
		20.86	7.98469e-07	32.5	1
		20.87	8.38112e-07	32	1
		20.88	8.79601e-07	32	0
		20.89	9.23015e-07	ErrBox	ErrBox
		20.9	9.68437e-07	34.5	0
		20.91	1.01595e-06	35	0
		20.92	1.06565e-06	35	1
		20.93	1.12318e-06	34.5	1
		20.94	1.17769e-06	34.5	0
		20.95	1.23467e-06	ErrBox	ErrBox
		20.96	1.29424e-06	36.5	0
		20.97	1.35649e-06	37	0
		20.98	1.42154e-06	37	1
		20.99	1.4895e-06	36.5	1
		21	1.5605e-06	36.5	0
		21.01	1.63465e-06	ErrBox	ErrBox
		21.02	1.71767e-06
		21.03	1.79878e-06
		21.04	1.88346e-06
		21.05	1.97185e-06
		21.06	2.06411e-06
		21.07	2.16039e-06
		21.08	2.26084e-06
		21.09	2.36564e-06
		21.1	2.47496e-06
		21.11	2.58897e-06
		21.12	2.70786e-06
		21.13	2.83182e-06
		21.14	2.96105e-06
		21.15	3.09574e-06
		21.16	3.23611e-06
		21.17	3.38239e-06
		21.18	3.53478e-06
		21.19	3.69353e-06
		21.2	3.85888e-06
		21.21	4.03107e-06
		21.22	4.21036e-06
		21.23	4.39702e-06
		21.24	4.59132e-06
		21.25	4.79354e-06
		21.26	5.00398e-06
		21.27	5.22293e-06
		21.28	5.45071e-06
		21.29	5.68763e-06
		21.3	5.93403e-06
		21.31	6.19025e-06
		21.32	6.45663e-06
		21.33	6.73355e-06
		21.34	7.02137e-06
		21.35	7.32048e-06
		21.36	7.63127e-06
		21.37	7.95415e-06
		21.38	8.28955e-06
		21.39	8.63789e-06
		21.4	8.99963e-06
		21.41	9.37521e-06
		21.42	9.76511e-06
		21.43	1.01698e-05
		21.44	1.05898e-05
		21.45	1.10257e-05
		21.46	1.14778e-05
		21.47	1.19469e-05
		21.48	1.24334e-05
		21.49	1.29379e-05
		21.5	1.34611e-05
		21.51	1.40034e-05
		21.52	1.45656e-05
		21.53	1.51482e-05
		21.54	1.5752e-05
		21.55	1.63775e-05
		21.56	1.70256e-05
		21.57	1.76968e-05
		21.58	1.83975e-05
		21.59	1.91176e-05
		21.6	1.98633e-05
		21.61	2.06351e-05
		21.62	2.1434e-05
		21.63	2.22607e-05
		21.64	2.31161e-05
		21.65	2.4001e-05
		21.66	2.49164e-05
		21.67	2.58631e-05
		21.68	2.6842e-05
		21.69	2.78542e-05
		21.7	2.89005e-05
		21.71	2.9982e-05
		21.72	3.10997e-05
		21.73	3.22546e-05
		21.74	3.34477e-05
		21.75	3.46802e-05
		21.76	3.59531e-05
		21.77	3.72676e-05
		21.78	3.86248e-05
		21.79	4.00259e-05
		21.8	4.14722e-05
		21.81	4.29647e-05
		21.82	4.45048e-05
		21.83	4.60938e-05
		21.84	4.77386e-05
		21.85	4.94298e-05
		21.86	5.11739e-05
		21.87	5.29723e-05
		21.88	5.48264e-05
		21.89	5.67375e-05
		21.9	5.87073e-05
		21.91	6.07371e-05
		21.92	6.28285e-05
		21.93	6.49831e-05
		21.94	6.72024e-05
		21.95	6.94879e-05
		21.96	7.18414e-05
		21.97	7.42645e-05
		21.98	7.67589e-05
		21.99	7.93262e-05
		22	8.19683e-05
		22.01	8.46869e-05
		22.02	8.74838e-05
		22.03	9.03608e-05
		22.04	9.33198e-05
		22.05	9.63627e-05
		22.06	9.94914e-05
		22.07	0.000102713
		22.08	0.000106026
		22.09	0.000109425
		22.1	0.000112918
		22.11	0.000116507
		22.12	0.000120194
		22.13	0.000123981
		22.14	0.000127871
		22.15	0.000131865
		22.16	0.000135966
		22.17	0.000140176
		22.18	0.000144498
		22.19	0.000148933
		22.2	0.000153485
		22.21	0.000158155
		22.22	0.000162951
		22.23	0.000167866
		22.24	0.000172907
		22.25	0.000178076
		22.26	0.000183376
		22.27	0.000188816
		22.28	0.000194387
		22.29	0.000200098
		22.3	0.000205956
		22.31	0.000211953
		22.32	0.000218104
		22.33	0.0002244
		22.34	0.000230849
		22.35	0.000237455
		22.36	0.000244226
		22.37	0.000251154
		22.38	0.000258254
		22.39	0.000265517
		22.4	0.000272952
		22.41	0.000280569
		22.42	0.000288359
		22.43	0.000296331
		22.44	0.00030449
		22.45	0.000312838
		22.46	0.000321378
		22.47	0.000330116
		22.48	0.000339066
		22.49	0.000348221
		22.5	0.00035758
		22.51	0.000367147
		22.52	0.000376931
		22.53	0.000386937
		22.54	0.000397173
		22.55	0.000407641
		22.56	0.000418338
		22.57	0.000429276
		22.58	0.000440458
		22.59	0.00045189
		22.6	0.000463576
		22.61	0.000475524
		22.62	0.000487737
		22.63	0.000500222
		22.64	0.000513001
		22.65	0.000526049
		22.66	0.000539392
		22.67	0.000553027
		22.68	0.000566965
		22.69	0.000581226
		22.7	0.000595793
		22.71	0.000610686
		22.72	0.000625917
		22.73	0.000641484
		22.74	0.000657405
		22.75	0.000673686
		22.76	0.000690334
		22.77	0.000707353
		22.78	0.000724759
		22.79	0.000742567
		22.8	0.000760781
		22.81	0.000779408
		22.82	0.00079847
		22.83	0.000817973
		22.84	0.000837923
		22.85	0.000858346
		22.86	0.000879242
		22.87	0.000900636
		22.88	0.000922533
		22.89	0.000944957
		22.9	0.000967919
		22.91	0.00099143
		22.92	0.00101551
		22.93	0.00104019
		22.94	0.00106547
		22.95	0.00109137
		22.96	0.00111792
		22.97	0.00114513
		22.98	0.00117302
		22.99	0.00120163
		23	0.00123097
		23.01	0.00126107
		23.02	0.00129194
		23.03	0.00132361
		23.04	0.00135611
		23.05	0.00138947
		23.06	0.00142373
		23.07	0.00145889
		23.08	0.001495
		23.09	0.00153208
		23.1	0.00157018
		23.11	0.00160933
		23.12	0.00164955
		23.13	0.00169089
		23.14	0.00173339
		23.15	0.00177708
		23.16	0.00182199
		23.17	0.00186819
		23.18	0.00191569
		23.19	0.00196456
		23.2	0.00201483
		23.21	0.00206655
		23.22	0.00211977
		23.23	0.00217456
		23.24	0.00223094
		23.25	0.00228899
		23.26	0.00234874
		23.27	0.00241025
		23.28	0.00247359
		23.29	0.00253881
		23.3	0.00260597
		23.31	0.00267516
		23.32	0.0027464
		23.33	0.00281978
		23.34	0.00289535
		23.35	0.00297322
		23.36	0.00305341
		23.37	0.00313603
		23.38	0.00322115
		23.39	0.00330883
		23.4	0.00339915
		23.41	0.0034922
		23.42	0.00358806
		23.43	0.00368681
		23.44	0.00378854
		23.45	0.00389335
		23.46	0.00400131
		23.47	0.00411251
		23.48	0.00422704
		23.49	0.00434501
		23.5	0.0044665
		23.51	0.00459163
		23.52	0.00472048
		23.53	0.00485316
		23.54	0.00498979
		23.55	0.00513045
		23.56	0.00527525
		23.57	0.00542434
		23.58	0.00557777
		23.59	0.00573568
		23.6	0.0058982
		23.61	0.00606542
		23.62	0.00623748
		23.63	0.00641449
		23.64	0.00659657
		23.65	0.00678384
		23.66	0.00697644
		23.67	0.0071745
		23.68	0.00737813
		23.69	0.00758747
		23.7	0.00780267
		23.71	0.00802384
		23.72	0.00825111
		23.73	0.00848464
		23.74	0.00872455
		23.75	0.00897099
		23.76	0.0092241
		23.77	0.00948403
		23.78	0.00975091
		23.79	0.0100249
		23.8	0.0103062
		23.81	0.0105948
		23.82	0.010891
		23.83	0.0111949
		23.84	0.0115067
		23.85	0.0118265
		23.86	0.0121545
		23.87	0.0124908
		23.88	0.0128355
		23.89	0.013189
		23.9	0.0135512
		23.91	0.0139224
		23.92	0.0143028
		23.93	0.0146925
		23.94	0.0150916
		23.95	0.0155004
		23.96	0.0159189
		23.97	0.0163475
		23.98	0.0167862
		23.99	0.0172352
		24	0.0176947
		24.01	0.0181648
		24.02	0.0186458
		24.03	0.0191378
		24.04	0.0196409
		24.05	0.0201554
		24.06	0.0206815
		24.07	0.0212192
		24.08	0.0217688
		24.09	0.0223305
		24.1	0.0229044
		24.11	0.0234907
		24.12	0.0240896
		24.13	0.0247012
		24.14	0.0253257
		24.15	0.0259634
		24.16	0.0266143
		24.17	0.0272787
		24.18	0.0279567
		24.19	0.0286484
		24.2	0.0293542
		24.21	0.030074
		24.22	0.0308082
		24.23	0.0315568
		24.24	0.03232
		24.25	0.033098
		24.26	0.0338909
		24.27	0.034699
		24.28	0.0355223
		24.29	0.036361
		24.3	0.0372152
		24.31	0.0380851
		24.32	0.0389709
		24.33	0.0398727
		24.34	0.0407905
		24.35	0.0417246
		24.36	0.0426751
		24.37	0.0436421
		24.38	0.0446257
		24.39	0.045626
		24.4	0.0466431
		24.41	0.0476772
		24.42	0.0487283
		24.43	0.0497965
		24.44	0.050882
		24.45	0.0519847
		24.46	0.0531048
		24.47	0.0542423
		24.48	0.0553973
		24.49	0.0565699
		24.5	0.0577601
		24.51	0.0589678
		24.52	0.0601933
		24.53	0.0614364
		24.54	0.0626972
		24.55	0.0639758
		24.56	0.065272
		24.57	0.0665859
		24.58	0.0679175
		24.59	0.0692668
		24.6	0.0706336
		24.61	0.072018
		24.62	0.07342
		24.63	0.0748393
		24.64	0.0762761
		24.65	0.0777301
		24.66	0.0792013
		24.67	0.0806896
		24.68	0.0821948
		24.69	0.0837169
		24.7	0.0852557
		24.71	0.0868111
		24.72	0.0883829
		24.73	0.089971
		24.74	0.0915751
		24.75	0.0931951
		24.76	0.0948308
		24.77	0.0964821
		24.78	0.0981486
		24.79	0.0998301
		24.8	0.101526
		24.81	0.103237
		24.82	0.104963
		24.83	0.106702
		24.84	0.108455
		24.85	0.110222
		24.86	0.112002
		24.87	0.113795
		24.88	0.1156
		24.89	0.117418
		24.9	0.119248
		24.91	0.121089
		24.92	0.122942
		24.93	0.124806
		24.94	0.126681
		24.95	0.128566
		24.96	0.13046
		24.97	0.132365
		24.98	0.134278
		24.99	0.1362
		25	0.138131
		25.01	0.14007
		25.02	0.142017
		25.03	0.14397
		25.04	0.145931
		25.05	0.147898
		25.06	0.149872
		25.07	0.15185
		25.08	0.153835
		25.09	0.155824
		25.1	0.157817
		25.11	0.159815
		25.12	0.161816
		25.13	0.163821
		25.14	0.165828
		25.15	0.167838
		25.16	0.16985
		25.17	0.171863
		25.18	0.173878
		25.19	0.175894
		25.2	0.17791
		25.21	0.179926
		25.22	0.181942
		25.23	0.183957
		25.24	0.185971
		25.25	0.187983
		25.26	0.189994
		25.27	0.192002
		25.28	0.194008
		25.29	0.196011
		25.3	0.198011
		25.31	0.200007
		25.32	0.201999
		25.33	0.203987
		25.34	0.20597
		25.35	0.207949
		25.36	0.209922
		25.37	0.21189
		25.38	0.213851
		25.39	0.215807
		25.4	0.217756
		25.41	0.219699
		25.42	0.221634
		25.43	0.223563
		25.44	0.225484
		25.45	0.227397
		25.46	0.229302
		25.47	0.231199
		25.48	0.233087
		25.49	0.234967
		25.5	0.236838
		25.51	0.2387
		25.52	0.240553
		25.53	0.242396
		25.54	0.244229
		25.55	0.246052
		25.56	0.247865
		25.57	0.249668
		25.58	0.251461
		25.59	0.253243
		25.6	0.255014
		25.61	0.256774
		25.62	0.258523
		25.63	0.26026
		25.64	0.261987
		25.65	0.263701
		25.66	0.265404
		25.67	0.267095
		25.68	0.268774
		25.69	0.27044
		25.7	0.272095
		25.71	0.273736
		25.72	0.275365
		25.73	0.276982
		25.74	0.278585
		25.75	0.280175
		25.76	0.281752
		25.77	0.283316
		25.78	0.284866
		25.79	0.286403
		25.8	0.287925
		25.81	0.289434
		25.82	0.290928
		25.83	0.292408
		25.84	0.293874
		25.85	0.295325
		25.86	0.296761
		25.87	0.298182
		25.88	0.299587
		25.89	0.300978
		25.9	0.302353
		25.91	0.303712
		25.92	0.305055
		25.93	0.306382
		25.94	0.307692
		25.95	0.308986
		25.96	0.310264
		25.97	0.311524
		25.98	0.312767
		25.99	0.313992
		26	0.3152
		26.01	0.31639
		26.02	0.317562
		26.03	0.318715
		26.04	0.31985
		26.05	0.320965
		26.06	0.322062
		26.07	0.323139
		26.08	0.324197
		26.09	0.325234
		26.1	0.326251
		26.11	0.327248
		26.12	0.328224
		26.13	0.32918
		26.14	0.330113
		26.15	0.331026
		26.16	0.331916
		26.17	0.332784
		26.18	0.33363
		26.19	0.334453
		26.2	0.335254
		26.21	0.336031
		26.22	0.336784
		26.23	0.337514
		26.24	0.33822
		26.25	0.338901
		26.26	0.339558
		26.27	0.34019
		26.28	0.340797
		26.29	0.341379
		26.3	0.341935
		26.31	0.342465
		26.32	0.34297
		26.33	0.343448
		26.34	0.343899
		26.35	0.344324
		26.36	0.344722
		26.37	0.345092
		26.38	0.345436
		26.39	0.345752
		26.4	0.34604
		26.41	0.3463
		26.42	0.346532
		26.43	0.346736
		26.44	0.346912
		26.45	0.347059
		26.46	0.347178
		26.47	0.347267
		26.48	0.347329
		26.49	0.347361
		26.5	0.347364
		26.51	0.347338
		26.52	0.347283
		26.53	0.347199
		26.54	0.347085
		26.55	0.346943
		26.56	0.346771
		26.57	0.34657
		26.58	0.34634
		26.59	0.34608
		26.6	0.345791
		26.61	0.345474
		26.62	0.345127
		26.63	0.344751
		26.64	0.344346
		26.65	0.343912
		26.66	0.34345
		26.67	0.342959
		26.68	0.34244
		26.69	0.341892
		26.7	0.341316
		26.71	0.340712
		26.72	0.34008
		26.73	0.339421
		26.74	0.338734
		26.75	0.338019
		26.76	0.337278
		26.77	0.33651
		26.78	0.335715
		26.79	0.334894
		26.8	0.334047
		26.81	0.333174
		26.82	0.332276
		26.83	0.331352
		26.84	0.330403
		26.85	0.32943
		26.86	0.328432
		26.87	0.32741
		26.88	0.326365
		26.89	0.325296
		26.9	0.324203
		26.91	0.323088
		26.92	0.321951
		26.93	0.320792
		26.94	0.31961
		26.95	0.318408
		26.96	0.317184
		26.97	0.31594
		26.98	0.314676
		26.99	0.313391
		27	0.312088
		27.01	0.310765
		27.02	0.309423
		27.03	0.308063
		27.04	0.306685
		27.05	0.305289
		27.06	0.303876
		27.07	0.302447
		27.08	0.301001
		27.09	0.299539
		27.1	0.298061
		27.11	0.296568
		27.12	0.295061
		27.13	0.293539
		27.14	0.292003
		27.15	0.290453
		27.16	0.28889
		27.17	0.287314
		27.18	0.285726
		27.19	0.284126
		27.2	0.282514
		27.21	0.280891
		27.22	0.279257
		27.23	0.277613
		27.24	0.275958
		27.25	0.274294
		27.26	0.27262
		27.27	0.270937
		27.28	0.269246
		27.29	0.267547
		27.3	0.265839
		27.31	0.264125
		27.32	0.262403
		27.33	0.260674
		27.34	0.258939
		27.35	0.257198
		27.36	0.255451
		27.37	0.253699
		27.38	0.251942
		27.39	0.25018
		27.4	0.248414
		27.41	0.246643
		27.42	0.244869
		27.43	0.243092
		27.44	0.241312
		27.45	0.239529
		27.46	0.237743
		27.47	0.235956
		27.48	0.234167
		27.49	0.232376
		27.5	0.230584
		27.51	0.228791
		27.52	0.226997
		27.53	0.225204
		27.54	0.22341
		27.55	0.221616
		27.56	0.219823
		27.57	0.21803
		27.58	0.216239
		27.59	0.214449
		27.6	0.21266
		27.61	0.210873
		27.62	0.209088
		27.63	0.207306
		27.64	0.205525
		27.65	0.203748
		27.66	0.201974
		27.67	0.200202
		27.68	0.198434
		27.69	0.19667
		27.7	0.19491
		27.71	0.193153
		27.72	0.191401
		27.73	0.189653
		27.74	0.18791
		27.75	0.186171
		27.76	0.184438
		27.77	0.182709
		27.78	0.180986
		27.79	0.179268
		27.8	0.177557
		27.81	0.17585
		27.82	0.17415
		27.83	0.172456
		27.84	0.170768
		27.85	0.169087
		27.86	0.167412
		27.87	0.165744
		27.88	0.164082
		27.89	0.162428
		27.9	0.16078
		27.91	0.15914
		27.92	0.157507
		27.93	0.155882
		27.94	0.154264
		27.95	0.152653
		27.96	0.151051
		27.97	0.149456
		27.98	0.147869
		27.99	0.14629
		28	0.144719
		28.01	0.143156
		28.02	0.141602
		28.03	0.140056
		28.04	0.138518
		28.05	0.136989
		28.06	0.135468
		28.07	0.133956
		28.08	0.132453
		28.09	0.130958
		28.1	0.129472
		28.11	0.127996
		28.12	0.126527
		28.13	0.125068
		28.14	0.123618
		28.15	0.122177
		28.16	0.120745
		28.17	0.119322
		28.18	0.117909
		28.19	0.116504
		28.2	0.115109
		28.21	0.113723
		28.22	0.112347
		28.23	0.11098
		28.24	0.109622
		28.25	0.108274
		28.26	0.106935
		28.27	0.105605
		28.28	0.104286
		28.29	0.102975
		28.3	0.101674
		28.31	0.100383
		28.32	0.0991018
		28.33	0.0978298
		28.34	0.0965676
		28.35	0.095315
		28.36	0.0940721
		28.37	0.0928389
		28.38	0.0916155
		28.39	0.0904018
		28.4	0.0891979
		28.41	0.0880038
		28.42	0.0868195
		28.43	0.085645
		28.44	0.0844804
		28.45	0.0833256
		28.46	0.0821807
		28.47	0.0810458
		28.48	0.0799207
		28.49	0.0788055
		28.5	0.0777003
		28.51	0.0766051
		28.52	0.0755198
		28.53	0.0744446
		28.54	0.0733793
		28.55	0.072324
		28.56	0.0712788
		28.57	0.0702437
		28.58	0.0692185
		28.59	0.0682035
		28.6	0.0671985
		28.61	0.0662037
		28.62	0.0652189
		28.63	0.0642443
		28.64	0.0632798
		28.65	0.0623254
		28.66	0.0613812
		28.67	0.0604472
		28.68	0.0595233
		28.69	0.0586096
		28.7	0.0577061
		28.71	0.0568128
		28.72	0.0559296
		28.73	0.0550567
		28.74	0.054194
		28.75	0.0533415
		28.76	0.0524992
		28.77	0.0516671
		28.78	0.0508452
		28.79	0.0500335
		28.8	0.049232
		28.81	0.0484407
		28.82	0.0476596
		28.83	0.0468888
		28.84	0.0461281
		28.85	0.0453775
		28.86	0.0446371
		28.87	0.0439069
		28.88	0.0431868
		28.89	0.0424768
		28.9	0.041777
		28.91	0.0410872
		28.92	0.0404074
		28.93	0.0397377
		28.94	0.0390781
		28.95	0.0384284
		28.96	0.0377886
		28.97	0.0371588
		28.98	0.0365389
		28.99	0.0359288
		29	0.0353286
		29.01	0.0347382
		29.02	0.0341575
		29.03	0.0335865
		29.04	0.0330252
		29.05	0.0324735
		29.06	0.0319314
		29.07	0.0313987
		29.08	0.0308756
		29.09	0.0303618
		29.1	0.0298575
		29.11	0.0293624
		29.12	0.0288765
		29.13	0.0283998
		29.14	0.0279322
		29.15	0.0274737
		29.16	0.0270241
		29.17	0.0265834
		29.18	0.0261516
		29.19	0.0257285
		29.2	0.0253141
		29.21	0.0249083
		29.22	0.0245109
		29.23	0.0241221
		29.24	0.0237415
		29.25	0.0233693
		29.26	0.0230052
		29.27	0.0226492
		29.28	0.0223012
		29.29	0.0219611
		29.3	0.0216288
		29.31	0.0213042
		29.32	0.0209873
		29.33	0.0206778
		29.34	0.0203758
		29.35	0.0200811
		29.36	0.0197936
		29.37	0.0195132
		29.38	0.0192398
		29.39	0.0189733
		29.4	0.0187136
		29.41	0.0184606
		29.42	0.0182141
		29.43	0.0179742
		29.44	0.0177406
		29.45	0.0175132
		29.46	0.017292
		29.47	0.0170767
		29.48	0.0168674
		29.49	0.0166639
		29.5	0.0164661
		29.51	0.0162738
		29.52	0.016087
		29.53	0.0159055
		29.54	0.0157293
		29.55	0.0155581
		29.56	0.015392
		29.57	0.0152308
		29.58	0.0150743
		29.59	0.0149224
		29.6	0.0147751
		29.61	0.0146323
		29.62	0.0144937
		29.63	0.0143594
		29.64	0.0142291
		29.65	0.0141029
		29.66	0.0139804
		29.67	0.0138618
		29.68	0.0137468
		29.69	0.0136353
		29.7	0.0135273
		29.71	0.0134226
		29.72	0.0133211
		29.73	0.0132228
		29.74	0.0131274
		29.75	0.013035
		29.76	0.0129454
		29.77	0.0128585
		29.78	0.0127742
		29.79	0.0126924
		29.8	0.012613
		29.81	0.012536
		29.82	0.0124612
		29.83	0.0123885
		29.84	0.0123179
		29.85	0.0122492
		29.86	0.0121824
		29.87	0.0121174
		29.88	0.0120541
		29.89	0.0119924
		29.9	0.0119323
		29.91	0.0118736
		29.92	0.0118164
		29.93	0.0117604
		29.94	0.0117056
		29.95	0.011652
		29.96	0.0115996
		29.97	0.0115481
		29.98	0.0114976
		29.99	0.011448
		30	0.0113992
		30.01	0.0113512
		30.02	0.0113039
		30.03	0.0112572
		30.04	0.0112112
		30.05	0.0111657
		30.06	0.0111206
		30.07	0.0110761
		30.08	0.0110319
		30.09	0.010988
		30.1	0.0109445
		30.11	0.0109012
		30.12	0.0108581
		30.13	0.0108152
		30.14	0.0107725
		30.15	0.0107298
		30.16	0.0106873
		30.17	0.0106447
		30.18	0.0106022
		30.19	0.0105596
		30.2	0.010517
		30.21	0.0104743
		30.22	0.0104315
		30.23	0.0103886
		30.24	0.0103456
		30.25	0.0103024
		30.26	0.010259
		30.27	0.0102154
		30.28	0.0101715
		30.29	0.0101275
		30.3	0.0100832
		30.31	0.0100387
		30.32	0.00999389
		30.33	0.00994882
		30.34	0.00990348
		30.35	0.00985785
		30.36	0.00981194
		30.37	0.00976572
		30.38	0.00971921
		30.39	0.00967241
		30.4	0.00962531
		30.41	0.00957792
		30.42	0.00953023
		30.43	0.00948224
		30.44	0.00943397
		30.45	0.0093854
		30.46	0.00933656
		30.47	0.00928744
		30.48	0.00923804
		30.49	0.00918839
		30.5	0.00913849
		30.51	0.00908832
		30.52	0.00903793
		30.53	0.00898732
		30.54	0.00893649
		30.55	0.00888546
		30.56	0.00883423
		30.57	0.00878282
		30.58	0.00873123
		30.59	0.00867949
		30.6	0.0086276
		30.61	0.00857558
		30.62	0.00852344
		30.63	0.0084712
		30.64	0.00841886
		30.65	0.00836645
		30.66	0.00831398
		30.67	0.00826145
		30.68	0.00820889
		30.69	0.00815632
		30.7	0.00810374
		30.71	0.00805117
		30.72	0.00799863
		30.73	0.00794612
		30.74	0.00789368
		30.75	0.00784129
		30.76	0.007789
		30.77	0.0077368
		30.78	0.00768472
		30.79	0.00763276
		30.8	0.00758095
		30.81	0.00752929
		30.82	0.00747781
		30.83	0.00742649
		30.84	0.00737539
		30.85	0.00732449
		30.86	0.00727382
		30.87	0.00722339
		30.88	0.0071732
		30.89	0.00712327
		30.9	0.00707362
		30.91	0.00702425
		30.92	0.00697517
		30.93	0.00692641
		30.94	0.00687796
		30.95	0.00682983
		30.96	0.00678205
		30.97	0.00673461
		30.98	0.00668753
		30.99	0.00664081
		31	0.00659448
		31.01	0.00654852
		31.02	0.00650295
		31.03	0.00645779
		31.04	0.00641303
		31.05	0.00636868
		31.06	0.00632474
		31.07	0.00628124
		31.08	0.00623817
		31.09	0.00619554
		31.1	0.00615334
		31.11	0.0061116
		31.12	0.00607029
		31.13	0.00602945
		31.14	0.00598907
		31.15	0.00594914
		31.16	0.00590968
		31.17	0.00587069
		31.18	0.00583217
		31.19	0.00579411
		31.2	0.00575652
		31.21	0.00571941
		31.22	0.00568277
		31.23	0.00564661
		31.24	0.00561092
		31.25	0.0055757
		31.26	0.00554095
		31.27	0.00550668
		31.28	0.00547288
		31.29	0.00543956
		31.3	0.0054067
		31.31	0.0053743
		31.32	0.00534237
		31.33	0.0053109
		31.34	0.00527989
		31.35	0.00524933
		31.36	0.00521923
		31.37	0.00518958
		31.38	0.00516036
		31.39	0.0051316
		31.4	0.00510326
		31.41	0.00507536
		31.42	0.00504788
		31.43	0.00502083
		31.44	0.00499419
		31.45	0.00496797
		31.46	0.00494215
		31.47	0.00491673
		31.48	0.0048917
		31.49	0.00486707
		31.5	0.00484281
		31.51	0.00481893
		31.52	0.00479542
		31.53	0.00477227
		31.54	0.00474948
		31.55	0.00472703
		31.56	0.00470493
		31.57	0.00468316
		31.58	0.00466171
		31.59	0.00464059
		31.6	0.00461978
		31.61	0.00459928
		31.62	0.00457907
		31.63	0.00455915
		31.64	0.00453951
		31.65	0.00452014
		31.66	0.00450105
		31.67	0.0044822
		31.68	0.00446361
		31.69	0.00444526
		31.7	0.00442714
		31.71	0.00440925
		31.72	0.00439158
		31.73	0.00437411
		31.74	0.00435685
		31.75	0.00433978
		31.76	0.00432289
		31.77	0.00430618
		31.78	0.00428964
		31.79	0.00427326
		31.8	0.00425703
		31.81	0.00424095
		31.82	0.004225
		31.83	0.00420918
		31.84	0.00419348
		31.85	0.00417789
		31.86	0.00416241
		31.87	0.00414703
		31.88	0.00413174
		31.89	0.00411653
		31.9	0.00410139
		31.91	0.00408632
		31.92	0.00407131
		31.93	0.00405635
		31.94	0.00404144
		31.95	0.00402657
		31.96	0.00401172
		31.97	0.00399691
		31.98	0.00398211
		31.99	0.00396732
		32	0.00395254
		32.01	0.00393776
		32.02	0.00392297
		32.03	0.00390816
		32.04	0.00389334
		32.05	0.00387849
		32.06	0.00386361
		32.07	0.0038487
		32.08	0.00383374
		32.09	0.00381874
		32.1	0.00380369
		32.11	0.00378858
		32.12	0.00377341
		32.13	0.00375818
		32.14	0.00374287
		32.15	0.0037275
		32.16	0.00371205
		32.17	0.00369651
		32.18	0.0036809
		32.19	0.00366519
		32.2	0.0036494
		32.21	0.00363351
		32.22	0.00361752
		32.23	0.00360144
		32.24	0.00358525
		32.25	0.00356897
		32.26	0.00355257
		32.27	0.00353607
		32.28	0.00351946
		32.29	0.00350274
		32.3	0.00348591
		32.31	0.00346897
		32.32	0.00345192
		32.33	0.00343475
		32.34	0.00341748
		32.35	0.00340008
		32.36	0.00338258
		32.37	0.00336496
		32.38	0.00334723
		32.39	0.00332939
		32.4	0.00331143
		32.41	0.00329337
		32.42	0.0032752
		32.43	0.00325693
		32.44	0.00323855
		32.45	0.00322007
		32.46	0.00320148
		32.47	0.0031828
		32.48	0.00316402
		32.49	0.00314515
		32.5	0.0031262
		32.51	0.00310715
		32.52	0.00308802
		32.53	0.00306881
		32.54	0.00304953
		32.55	0.00303017
		32.56	0.00301074
		32.57	0.00299126
		32.58	0.00297171
		32.59	0.0029521
		32.6	0.00293245
		32.61	0.00291275
		32.62	0.002893
		32.63	0.00287323
		32.64	0.00285342
		32.65	0.00283359
		32.66	0.00281374
		32.67	0.00279387
		32.68	0.002774
		32.69	0.00275413
		32.7	0.00273426
		32.71	0.0027144
		32.72	0.00269455
		32.73	0.00267473
		32.74	0.00265494
		32.75	0.00263519
		32.76	0.00261548
		32.77	0.00259582
		32.78	0.00257621
		32.79	0.00255667
		32.8	0.00253719
		32.81	0.0025178
		32.82	0.00249848
		32.83	0.00247926
		32.84	0.00246014
		32.85	0.00244112
		32.86	0.00242222
		32.87	0.00240343
		32.88	0.00238478
		32.89	0.00236625
		32.9	0.00234787
		32.91	0.00232964
		32.92	0.00231156
		32.93	0.00229365
		32.94	0.00227591
		32.95	0.00225835
		32.96	0.00224097
		32.97	0.00222379
		32.98	0.00220681
		32.99	0.00219003
		33	0.00217347
		33.01	0.00215713
		33.02	0.00214101
		33.03	0.00212513
		33.04	0.00210949
		33.05	0.00209411
		33.06	0.00207897
		33.07	0.0020641
		33.08	0.0020495
		33.09	0.00203518
		33.1	0.00202113
		33.11	0.00200737
		33.12	0.00199391
		33.13	0.00198074
		33.14	0.00196788
		33.15	0.00195534
		33.16	0.0019431
		33.17	0.0019312
		33.18	0.00191961
		33.19	0.00190837
		33.2	0.00189745
		33.21	0.00188689
		33.22	0.00187667
		33.23	0.0018668
		33.24	0.00185728
		33.25	0.00184813
		33.26	0.00183935
		33.27	0.00183093
		33.28	0.00182288
		33.29	0.00181521
		33.3	0.00180792
		33.31	0.00180101
		33.32	0.00179449
		33.33	0.00178835
		33.34	0.00178261
		33.35	0.00177725
		33.36	0.0017723
		33.37	0.00176773
		33.38	0.00176357
		33.39	0.00175981
		33.4	0.00175645
		33.41	0.00175349
		33.42	0.00175094
		33.43	0.00174879
		33.44	0.00174704
		33.45	0.0017457
		33.46	0.00174477
		33.47	0.00174424
		33.48	0.00174411
		33.49	0.00174439
		33.5	0.00174507
		33.51	0.00174615
		33.52	0.00174763
		33.53	0.0017495
		33.54	0.00175178
		33.55	0.00175445
		33.56	0.0017575
		33.57	0.00176095
		33.58	0.00176479
		33.59	0.00176901
		33.6	0.00177361
		33.61	0.00177859
		33.62	0.00178394
		33.63	0.00178966
		33.64	0.00179575
		33.65	0.00180219
		33.66	0.001809
		33.67	0.00181615
		33.68	0.00182365
		33.69	0.0018315
		33.7	0.00183968
		33.71	0.00184819
		33.72	0.00185702
		33.73	0.00186617
		33.74	0.00187564
		33.75	0.00188541
		33.76	0.00189548
		33.77	0.00190584
		33.78	0.00191649
		33.79	0.00192742
		33.8	0.00193862
		33.81	0.00195009
		33.82	0.00196181
		33.83	0.00197378
		33.84	0.00198599
		33.85	0.00199843
		33.86	0.00201109
		33.87	0.00202397
		33.88	0.00203706
		33.89	0.00205034
		33.9	0.00206382
		33.91	0.00207747
		33.92	0.0020913
		33.93	0.00210529
		33.94	0.00211943
		33.95	0.00213371
		33.96	0.00214813
		33.97	0.00216267
		33.98	0.00217733
		33.99	0.00219209
		34	0.00220695
		34.01	0.00222189
		34.02	0.00223691
		34.03	0.00225199
		34.04	0.00226713
		34.05	0.00228231
		34.06	0.00229753
		34.07	0.00231277
		34.08	0.00232803
		34.09	0.00234329
		34.1	0.00235855
		34.11	0.00237379
		34.12	0.002389
		34.13	0.00240418
		34.14	0.00241931
		34.15	0.00243439
		34.16	0.0024494
		34.17	0.00246434
		34.18	0.00247919
		34.19	0.00249394
		34.2	0.00250859
		34.21	0.00252312
		34.22	0.00253753
		34.23	0.00255181
		34.24	0.00256594
		34.25	0.00257991
		34.26	0.00259373
		34.27	0.00260737
		34.28	0.00262084
		34.29	0.00263411
		34.3	0.00264719
		34.31	0.00266006
		34.32	0.00267272
		34.33	0.00268515
		34.34	0.00269735
		34.35	0.00270931
		34.36	0.00272103
		34.37	0.00273249
		34.38	0.00274369
		34.39	0.00275463
		34.4	0.00276528
		34.41	0.00277566
		34.42	0.00278575
		34.43	0.00279554
		34.44	0.00280503
		34.45	0.00281421
		34.46	0.00282308
		34.47	0.00283163
		34.48	0.00283986
		34.49	0.00284776
		34.5	0.00285533
		34.51	0.00286256
		34.52	0.00286945
		34.53	0.00287599
		34.54	0.00288218
		34.55	0.00288803
		34.56	0.00289351
		34.57	0.00289864
		34.58	0.00290341
		34.59	0.00290781
		34.6	0.00291185
		34.61	0.00291553
		34.62	0.00291883
		34.63	0.00292176
		34.64	0.00292433
		34.65	0.00292652
		34.66	0.00292834
		34.67	0.0029298
		34.68	0.00293087
		34.69	0.00293158
		34.7	0.00293192
		34.71	0.00293189
		34.72	0.0029315
		34.73	0.00293073
		34.74	0.00292961
		34.75	0.00292811
		34.76	0.00292626
		34.77	0.00292406
		34.78	0.0029215
		34.79	0.0029186
		34.8	0.00291534
		34.81	0.00291174
		34.82	0.00290781
		34.83	0.00290354
		34.84	0.00289894
		34.85	0.00289401
		34.86	0.00288877
		34.87	0.00288321
		34.88	0.00287734
		34.89	0.00287117
		34.9	0.0028647
		34.91	0.00285794
		34.92	0.00285089
		34.93	0.00284357
		34.94	0.00283598
		34.95	0.00282812
		34.96	0.00282
		34.97	0.00281164
		34.98	0.00280303
		34.99	0.00279419
		35	0.00278512
		35.01	0.00277584
		35.02	0.00276634
		35.03	0.00275665
		35.04	0.00274676
		35.05	0.00273669
		35.06	0.00272644
		35.07	0.00271603
		35.08	0.00270546
		35.09	0.00269474
		35.1	0.00268388
		35.11	0.00267289
		35.12	0.00266179
		35.13	0.00265057
		35.14	0.00263925
		35.15	0.00262784
		35.16	0.00261635
		35.17	0.00260479
		35.18	0.00259316
		35.19	0.00258149
		35.2	0.00256977
		35.21	0.00255801
		35.22	0.00254624
		35.23	0.00253445
		35.24	0.00252265
		35.25	0.00251087
		35.26	0.0024991
		35.27	0.00248735
		35.28	0.00247565
		35.29	0.00246398
		35.3	0.00245237
		35.31	0.00244083
		35.32	0.00242936
		35.33	0.00241797
		35.34	0.00240667
		35.35	0.00239547
		35.36	0.00238439
		35.37	0.00237342
		35.38	0.00236258
		35.39	0.00235188
		35.4	0.00234132
		35.41	0.00233092
		35.42	0.00232067
		35.43	0.0023106
		35.44	0.0023007
		35.45	0.00229099
		35.46	0.00228148
		35.47	0.00227216
		35.48	0.00226305
		35.49	0.00225415
		35.5	0.00224548
		35.51	0.00223704
		35.52	0.00222882
		35.53	0.00222085
		35.54	0.00221313
		35.55	0.00220566
		35.56	0.00219844
		35.57	0.00219149
		35.58	0.00218481
		35.59	0.0021784
		35.6	0.00217227
		35.61	0.00216642
		35.62	0.00216086
		35.63	0.00215559
		35.64	0.00215061
		35.65	0.00214593
		35.66	0.00214156
		35.67	0.00213748
		35.68	0.00213371
		35.69	0.00213025
		35.7	0.0021271
		35.71	0.00212426
		35.72	0.00212174
		35.73	0.00211953
		35.74	0.00211764
		35.75	0.00211606
		35.76	0.0021148
		35.77	0.00211386
		35.78	0.00211324
		35.79	0.00211294
		35.8	0.00211295
		35.81	0.00211328
		35.82	0.00211392
		35.83	0.00211488
		35.84	0.00211615
		35.85	0.00211773
		35.86	0.00211962
		35.87	0.00212182
		35.88	0.00212431
		35.89	0.00212711
		35.9	0.00213021
		35.91	0.0021336
		35.92	0.00213727
		35.93	0.00214124
		35.94	0.00214549
		35.95	0.00215001
		35.96	0.00215481
		35.97	0.00215988
		35.98	0.00216521
		35.99	0.0021708
		36	0.00217664
		36.01	0.00218273
		36.02	0.00218906
		36.03	0.00219563
		36.04	0.00220242
		36.05	0.00220944
		36.06	0.00221668
		36.07	0.00222412
		36.08	0.00223176
		36.09	0.00223961
		36.1	0.00224763
		36.11	0.00225584
		36.12	0.00226423
		36.13	0.00227277
		36.14	0.00228148
		36.15	0.00229033
		36.16	0.00229933
		36.17	0.00230846
		36.18	0.00231771
		36.19	0.00232708
		36.2	0.00233656
		36.21	0.00234613
		36.22	0.0023558
		36.23	0.00236555
		36.24	0.00237537
		36.25	0.00238525
		36.26	0.00239519
		36.27	0.00240517
		36.28	0.00241519
		36.29	0.00242524
		36.3	0.0024353
		36.31	0.00244537
		36.32	0.00245545
		36.33	0.00246551
		36.34	0.00247555
		36.35	0.00248556
		36.36	0.00249554
		36.37	0.00250547
		36.38	0.00251535
		36.39	0.00252516
		36.4	0.00253489
		36.41	0.00254455
		36.42	0.00255411
		36.43	0.00256357
		36.44	0.00257291
		36.45	0.00258214
		36.46	0.00259125
		36.47	0.00260021
		36.48	0.00260903
		36.49	0.0026177
		36.5	0.0026262
		36.51	0.00263454
		36.52	0.00264269
		36.53	0.00265066
		36.54	0.00265843
		36.55	0.002666
		36.56	0.00267336
		36.57	0.00268051
		36.58	0.00268743
		36.59	0.00269411
		36.6	0.00270056
		36.61	0.00270676
		36.62	0.00271271
		36.63	0.00271839
		36.64	0.00272381
		36.65	0.00272896
		36.66	0.00273383
		36.67	0.00273841
		36.68	0.00274271
		36.69	0.00274671
		36.7	0.00275041
		36.71	0.0027538
		36.72	0.00275688
		36.73	0.00275964
		36.74	0.00276208
		36.75	0.0027642
		36.76	0.00276599
		36.77	0.00276745
		36.78	0.00276857
		36.79	0.00276935
		36.8	0.00276978
		36.81	0.00276988
		36.82	0.00276962
		36.83	0.00276901
		36.84	0.00276804
		36.85	0.00276672
		36.86	0.00276504
		36.87	0.002763
		36.88	0.0027606
		36.89	0.00275784
		36.9	0.00275471
		36.91	0.00275122
		36.92	0.00274736
		36.93	0.00274314
		36.94	0.00273855
		36.95	0.0027336
		36.96	0.00272828
		36.97	0.00272259
		36.98	0.00271654
		36.99	0.00271013
		37	0.00270336
		37.01	0.00269623
		37.02	0.00268873
		37.03	0.00268088
		37.04	0.00267268
		37.05	0.00266412
		37.06	0.0026552
		37.07	0.00264595
		37.08	0.00263634
		37.09	0.00262639
		37.1	0.00261611
		37.11	0.00260548
		37.12	0.00259453
		37.13	0.00258324
		37.14	0.00257163
		37.15	0.0025597
		37.16	0.00254745
		37.17	0.00253489
		37.18	0.00252202
		37.19	0.00250885
		37.2	0.00249537
		37.21	0.00248161
		37.22	0.00246755
		37.23	0.00245321
		37.24	0.00243859
		37.25	0.0024237
		37.26	0.00240854
		37.27	0.00239312
		37.28	0.00237744
		37.29	0.00236151
		37.3	0.00234534
		37.31	0.00232893
		37.32	0.00231229
		37.33	0.00229542
		37.34	0.00227833
		37.35	0.00226103
		37.36	0.00224352
		37.37	0.00222581
		37.38	0.00220791
		37.39	0.00218982
		37.4	0.00217155
		37.41	0.00215311
		37.42	0.0021345
		37.43	0.00211573
		37.44	0.0020968
		37.45	0.00207773
		37.46	0.00205852
		37.47	0.00203918
		37.48	0.00201971
		37.49	0.00200013
		37.5	0.00198043
		37.51	0.00196062
		37.52	0.00194072
		37.53	0.00192073
		37.54	0.00190065
		37.55	0.0018805
		37.56	0.00186027
		37.57	0.00183998
		37.58	0.00181963
		37.59	0.00179924
		37.6	0.0017788
		37.61	0.00175832
		37.62	0.00173781
		37.63	0.00171727
		37.64	0.00169672
		37.65	0.00167616
		37.66	0.00165559
		37.67	0.00163503
		37.68	0.00161447
		37.69	0.00159392
		37.7	0.0015734
		37.71	0.00155289
		37.72	0.00153243
		37.73	0.00151199
		37.74	0.0014916
		37.75	0.00147126
		37.76	0.00145098
		37.77	0.00143075
		37.78	0.00141059
		37.79	0.00139049
		37.8	0.00137048
		37.81	0.00135054
		37.82	0.00133068
		37.83	0.00131092
		37.84	0.00129125
		37.85	0.00127168
		37.86	0.00125222
		37.87	0.00123286
		37.88	0.0012136
		37.89	0.00119447
		37.9	0.00117546
		37.91	0.00115658
		37.92	0.00113782
		37.93	0.00111919
		37.94	0.0011007
		37.95	0.00108234
		37.96	0.00106413
		37.97	0.00104606
		37.98	0.00102814
		37.99	0.00101037
		38	0.000992758
		38.01	0.000975299
		38.02	0.000957999
		38.03	0.000940861
		38.04	0.000923886
		38.05	0.000907077
		38.06	0.000890436
		38.07	0.000873965
		38.08	0.000857666
		38.09	0.000841541
		38.1	0.000825592
		38.11	0.000809819
		38.12	0.000794225
		38.13	0.000778811
		38.14	0.000763578
		38.15	0.000748527
		38.16	0.000733659
		38.17	0.000718975
		38.18	0.000704476
		38.19	0.000690162
		38.2	0.000676035
		38.21	0.000662094
		38.22	0.000648341
		38.23	0.000634775
		38.24	0.000621397
		38.25	0.000608206
		38.26	0.000595203
		38.27	0.000582388
		38.28	0.000569761
		38.29	0.000557321
		38.3	0.000545069
		38.31	0.000533003
		38.32	0.000521124
		38.33	0.00050943
		38.34	0.000497922
		38.35	0.000486599
		38.36	0.000475459
		38.37	0.000464503
		38.38	0.000453728
		38.39	0.000443135
		38.4	0.000432722
		38.41	0.000422489
		38.42	0.000412433
		38.43	0.000402555
		38.44	0.000392852
		38.45	0.000383324
		38.46	0.000373969
		38.47	0.000364786
		38.48	0.000355773
		38.49	0.000346929
		38.5	0.000338253
		38.51	0.000329742
		38.52	0.000321396
		38.53	0.000313213
		38.54	0.00030519
		38.55	0.000297327
		38.56	0.000289622
		38.57	0.000282073
		38.58	0.000274678
		38.59	0.000267435
		38.6	0.000260343
		38.61	0.0002534
		38.62	0.000246604
		38.63	0.000239953
		38.64	0.00023344
		38.65	0.000227074
		38.66	0.000220847
		38.67	0.000214758
		38.68	0.000208804
		38.69	0.000202984
		38.7	0.000197295
		38.71	0.000191736
		38.72	0.000186305
		38.73	0.000181
		38.74	0.000175818
		38.75	0.000170759
		38.76	0.000165819
		38.77	0.000160997
		38.78	0.000156292
		38.79	0.0001517
		38.8	0.00014722
		38.81	0.000142851
		38.82	0.00013859
		38.83	0.000134435
		38.84	0.000130384
		38.85	0.000126436
		38.86	0.000122588
		38.87	0.000118839
		38.88	0.000115187
		38.89	0.00011163
		38.9	0.000108166
		38.91	0.000104793
		38.92	0.000101509
		38.93	9.83136e-05
		38.94	9.52037e-05
		38.95	9.21779e-05
		38.96	8.92344e-05
		38.97	8.63716e-05
		38.98	8.35876e-05
		38.99	8.08808e-05
		39	7.82495e-05
		39.01	7.56922e-05
		39.02	7.3207e-05
		39.03	7.07925e-05
		39.04	6.8447e-05
		39.05	6.6169e-05
		39.06	6.39568e-05
		39.07	6.18091e-05
		39.08	5.97242e-05
		39.09	5.77007e-05
		39.1	5.57371e-05
		39.11	5.3832e-05
		39.12	5.1984e-05
		39.13	5.01916e-05
		39.14	4.84535e-05
		39.15	4.67684e-05
		39.16	4.51349e-05
		39.17	4.35516e-05
		39.18	4.20174e-05
		39.19	4.0531e-05
		39.2	3.90911e-05
		39.21	3.76965e-05
		39.22	3.6346e-05
		39.23	3.50385e-05
		39.24	3.37728e-05
		39.25	3.25477e-05
		39.26	3.13623e-05
		39.27	3.02153e-05
		39.28	2.91058e-05
		39.29	2.80326e-05
		39.3	2.69949e-05
		39.31	2.59915e-05
		39.32	2.50216e-05
		39.33	2.40841e-05
		39.34	2.31781e-05
		39.35	2.23028e-05
		39.36	2.14572e-05
		39.37	2.06405e-05
		39.38	1.98518e-05
		39.39	1.90902e-05
		39.4	1.8355e-05
		39.41	1.76455e-05
		39.42	1.69607e-05
		39.43	1.62999e-05
		39.44	1.56625e-05
		39.45	1.50477e-05
		39.46	1.44547e-05
		39.47	1.3883e-05
		39.48	1.33318e-05
		39.49	1.28005e-05
		39.5	1.22885e-05
		39.51	1.17952e-05
		39.52	1.13199e-05
		39.53	1.0862e-05
		39.54	1.04211e-05
		39.55	9.99652e-06
		39.56	9.58775e-06
		39.57	9.19427e-06
		39.58	8.81557e-06
		39.59	8.45116e-06
		39.6	8.10056e-06
		39.61	7.7633e-06
		39.62	7.43893e-06
		39.63	7.12701e-06
		39.64	6.82711e-06
		39.65	6.53881e-06
		39.66	6.26172e-06
		39.67	5.99545e-06
		39.68	5.7396e-06
		39.69	5.49382e-06
		39.7	5.25776e-06
		39.71	5.03105e-06
		39.72	4.81338e-06
		39.73	4.60441e-06
		39.74	4.40383e-06
		39.75	4.21133e-06
		39.76	4.02663e-06
		39.77	3.84943e-06
		39.78	3.67946e-06
		39.79	3.51644e-06
		39.8	3.36013e-06
		39.81	3.21027e-06
		39.82	3.06662e-06
		39.83	2.92894e-06
		39.84	2.79701e-06
		39.85	2.67061e-06
		39.86	2.54953e-06
		39.87	2.43356e-06
		39.88	2.3225e-06
		39.89	2.21617e-06
		39.9	2.11438e-06
		39.91	2.01695e-06
		39.92	1.92371e-06
		39.93	1.8345e-06
		39.94	1.74916e-06
		39.95	1.66752e-06
		39.96	1.58946e-06
		39.97	1.51481e-06
		39.98	1.44344e-06
		39.99	1.37522e-06
[truncated: 1 more rows]

## Sheet: PlotDat20
Source sheet	data_isoplot	0.2	24.8708	1	16.2068	0.709107	0.85	15.4977
Plot name	Average17	119.8	24.8708	2	16.5743	0.773529	1.15	15.4977
Plot Type	15			3	16.6903	0.773519	1.15	16.9159
1st free col	8			4	16.7805	0.966907	0.85	16.9159
Sigma Level	2			5	16.845	1.03138	0.85	15.4977
Absolute Errs	TRUE			6	17.0384	1.05613	ErrBox	ErrBox
Symbol Type	1			7	17.3606	0.966811	1.85	15.8007
Inverse Plot	FALSE			8	17.4251	1.16029	2.15	15.8007
Color Plot	TRUE			9	17.6829	1.0957	2.15	17.3478
3D plot	FALSE			10	17.6958	0.837843	1.85	17.3478
Linear	FALSE			11	17.9407	0.966713	1.85	15.8007
Data Range	Q483:R601			12	18.1984	0.902238	ErrBox	ErrBox
Filled Symbols	TRUE			13	18.5851	0.902201	2.85	15.9168
ConcAge	FALSE			14	18.9073	1.22436	3.15	15.9168
ConcSwap	FALSE			15	21.0978	0.837402	3.15	17.4638
1st Symbol-row	1			16	21.1622	1.03065	2.85	17.4638
				17	21.3619	0.901781	2.85	15.9168
				18	21.5165	0.901765	ErrBox	ErrBox
				19	21.5422	0.837348	3.85	15.8136
				20	21.5487	1.03059	4.15	15.8136
				21	21.5551	0.966178	4.15	17.7474
				22	21.5744	0.966168	3.85	17.7474
				23	21.6775	1.15939	3.85	15.8136
				24	21.729	0.96615	ErrBox	ErrBox
				25	21.7419	0.966155	4.85	15.8136
				26	21.8707	1.15935	5.15	15.8136
				27	21.9351	1.09493	5.15	17.8764
				28	21.9995	1.15937	4.85	17.8764
				29	22.0124	0.901695	4.85	15.8136
				30	22.0639	1.4814	ErrBox	ErrBox
				31	22.0639	1.03051	5.85	15.9822
				32	22.1928	1.15932	6.15	15.9822
				33	22.1928	1.09489	6.15	18.0945
				34	22.2572	1.15929	5.85	18.0945
				35	22.3087	0.837248	5.85	15.9822
				36	22.4504	1.15926	ErrBox	ErrBox
				37	22.4504	1.54572	6.85	16.3938
				38	22.5856	0.901616	7.15	16.3938
				39	22.6436	1.09482	7.15	18.3274
				40	22.6436	1.03041	6.85	18.3274
				41	22.7724	1.0304	6.85	16.3938
				42	22.7724	1.0948	ErrBox	ErrBox
				43	22.7981	0.837185	7.85	16.2648
				44	22.9012	1.03038	8.15	16.2648
				45	23.03	1.09476	8.15	18.5854
				46	23.0364	0.901552	7.85	18.5854
				47	23.075	0.965945	7.85	16.2648
				48	23.0944	1.03034	ErrBox	ErrBox
				49	23.2232	1.28793	8.85	16.5872
				50	23.2232	1.28791	9.15	16.5872
				51	23.2553	0.965915	9.15	18.7786
				52	23.3391	0.965907	8.85	18.7786
				53	23.3519	1.0947	8.85	16.5872
				54	23.3906	0.965897	ErrBox	ErrBox
				55	23.4678	0.965897	9.85	16.8579
				56	23.4807	1.09468	10.15	16.8579
				57	23.6095	1.09466	10.15	18.5336
				58	23.6739	1.15905	9.85	18.5336
				59	23.6739	1.28784	9.85	16.8579
				60	24.0602	1.09458	ErrBox	ErrBox
				61	24.3113	0.901372	10.85	16.974
				62	24.3886	0.901362	11.15	16.974
				63	24.6397	1.15886	11.15	18.9074
				64	24.8972	1.2876	10.85	18.9074
				65	25.3993	0.965597	10.85	16.974
				66	26.6995	1.1585	ErrBox	ErrBox
				67	28.1217	1.15826	11.85	17.2962
				68	28.6301	1.28684	12.15	17.2962
				69	28.8231	1.35116	12.15	19.1007
				70	30.56	2.12271	11.85	19.1007
				71	31.9107	1.73638	11.85	17.2962
				72	33.1517	1.22164	ErrBox	ErrBox
				73	33.1967	1.47884	12.85	17.6829
				74	33.4539	1.47878	13.15	17.6829
				75	33.6725	1.28583	13.15	19.4873
				76	33.7239	1.28583	12.85	19.4873
				77	34.4182	1.28569	12.85	17.6829
				78	34.4825	1.67141	ErrBox	ErrBox
				79	34.5468	1.34995	13.85	17.6829
				80	34.5468	1.41424	14.15	17.6829
				81	34.6111	1.34994	14.15	20.1317
				82	34.7396	1.4142	13.85	20.1317
				83	34.8682	1.47844	13.85	17.6829
				84	35.1896	1.54266	ErrBox	ErrBox
				85	35.3182	1.41407	14.85	20.2604
				86	35.3182	1.41407	15.15	20.2604
				87	35.3182	1.41407	15.15	21.9352
				88	35.3824	1.41405	14.85	21.9352
				89	35.3824	1.67117	14.85	20.2604
				90	35.511	1.92824	ErrBox	ErrBox
				91	35.6395	1.54255	15.85	20.1315
				92	35.6395	1.47828	16.15	20.1315
				93	35.7038	1.54253	16.15	22.1929
				94	35.7681	1.54253	15.85	22.1929
				95	35.7681	1.99245	15.85	20.1315
				96	35.8323	1.54251	ErrBox	ErrBox
				97	35.8966	1.67102	16.85	20.4601
				98	35.8966	1.47823	17.15	20.4601
				99	36.0252	1.41392	17.15	22.2637
				100	36.0894	1.47818	16.85	22.2637
				101	36.0894	1.4139	16.85	20.4601
				102	36.0894	2.05665	ErrBox	ErrBox
				103	36.1922	1.34961	17.85	20.6147
				104	36.3465	1.47811	18.15	20.6147
				105	36.4108	1.60663	18.15	22.4182
				106	36.4108	1.60664	17.85	22.4182
				107	36.475	1.67089	17.85	20.6147
				108	36.6035	1.73513	ErrBox	ErrBox
				109	36.6035	1.99224	18.85	20.7049
				110	36.6678	1.60659	19.15	20.7049
				111	36.6678	1.92794	19.15	22.3796
				112	36.9313	1.34945	18.85	22.3796
				113	37.3104	1.60641	18.85	20.7049
				114	37.3104	1.54215	ErrBox	ErrBox
				115	37.6317	1.92764	19.85	20.5181
				116	37.6959	1.73485	20.15	20.5181
				117	38.0814	1.86324	20.15	22.5793
				118	38.9166	1.8631	19.85	22.5793
				119	53.4189	2.69272	19.85	20.5181
				IsoLine	IsoLine	IsoLine	ErrBox	ErrBox
							20.85	20.5889
							21.15	20.5889
							21.15	22.5213
							20.85	22.5213
							20.85	20.5889
							ErrBox	ErrBox
							21.85	20.6083
							22.15	20.6083
							22.15	22.5406
							21.85	22.5406
							21.85	20.6083
							ErrBox	ErrBox
							22.85	20.5181
							23.15	20.5181
							23.15	22.8369
							22.85	22.8369
							22.85	20.5181
							ErrBox	ErrBox
							23.85	20.7629
							24.15	20.7629
							24.15	22.6952
							23.85	22.6952
							23.85	20.7629
							ErrBox	ErrBox
							24.85	20.7758
							25.15	20.7758
							25.15	22.7081
							24.85	22.7081
							24.85	20.7758
							ErrBox	ErrBox
							25.85	20.7114
							26.15	20.7114
							26.15	23.0301
							25.85	23.0301
							25.85	20.7114
							ErrBox	ErrBox
							26.85	20.8402
							27.15	20.8402
							27.15	23.0301
							26.85	23.0301
							26.85	20.8402
							ErrBox	ErrBox
							27.85	20.8402
							28.15	20.8402
							28.15	23.1589
							27.85	23.1589
							27.85	20.8402
							ErrBox	ErrBox
							28.85	21.1107
							29.15	21.1107
							29.15	22.9141
							28.85	22.9141
							28.85	21.1107
							ErrBox	ErrBox
							29.85	20.5825
							30.15	20.5825
							30.15	23.5453
							29.85	23.5453
							29.85	20.5825
							ErrBox	ErrBox
							30.85	21.0334
							31.15	21.0334
							31.15	23.0945
							30.85	23.0945
							30.85	21.0334
							ErrBox	ErrBox
							31.85	21.0334
							32.15	21.0334
							32.15	23.3521
							31.85	23.3521
							31.85	21.0334
							ErrBox	ErrBox
							32.85	21.0979
							33.15	21.0979
							33.15	23.2876
							32.85	23.2876
							32.85	21.0979
							ErrBox	ErrBox
							33.85	21.0979
							34.15	21.0979
							34.15	23.4165
							33.85	23.4165
							33.85	21.0979
							ErrBox	ErrBox
							34.85	21.4714
							35.15	21.4714
							35.15	23.1459
							34.85	23.1459
							34.85	21.4714
							ErrBox	ErrBox
							35.85	21.2911
							36.15	21.2911
							36.15	23.6096
							35.85	23.6096
							35.85	21.2911
							ErrBox	ErrBox
							36.85	20.9046
							37.15	20.9046
							37.15	23.9961
							36.85	23.9961
							36.85	20.9046
							ErrBox	ErrBox
							37.85	21.684
							38.15	21.684
							38.15	23.4872
							37.85	23.4872
							37.85	21.684
							ErrBox	ErrBox
							38.85	21.5488
							39.15	21.5488
							39.15	23.7384
							38.85	23.7384
							38.85	21.5488
							ErrBox	ErrBox
							39.85	21.6132
							40.15	21.6132
							40.15	23.674
							39.85	23.674
							39.85	21.6132
							ErrBox	ErrBox
							40.85	21.742
							41.15	21.742
							41.15	23.8028
							40.85	23.8028
							40.85	21.742
							ErrBox	ErrBox
							41.85	21.6776
							42.15	21.6776
							42.15	23.8672
							41.85	23.8672
							41.85	21.6776
							ErrBox	ErrBox
							42.85	21.9609
							43.15	21.9609
							43.15	23.6353
							42.85	23.6353
							42.85	21.9609
							ErrBox	ErrBox
							43.85	21.8708
							44.15	21.8708
							44.15	23.9315
							43.85	23.9315
							43.85	21.8708
							ErrBox	ErrBox
							44.85	21.9352
							45.15	21.9352
							45.15	24.1247
							44.85	24.1247
							44.85	21.9352
							ErrBox	ErrBox
							45.85	22.1349
							46.15	22.1349
							46.15	23.938
							45.85	23.938
							45.85	22.1349
							ErrBox	ErrBox
							46.85	22.1091
							47.15	22.1091
							47.15	24.041
							46.85	24.041
							46.85	22.1091
							ErrBox	ErrBox
							47.85	22.064
							48.15	22.064
							48.15	24.1247
							47.85	24.1247
							47.85	22.064
							ErrBox	ErrBox
							48.85	21.9352
							49.15	21.9352
							49.15	24.5111
							48.85	24.5111
							48.85	21.9352
							ErrBox	ErrBox
							49.85	21.9352
							50.15	21.9352
							50.15	24.5111
							49.85	24.5111
							49.85	21.9352
							ErrBox	ErrBox
							50.85	22.2894
							51.15	22.2894
							51.15	24.2213
							50.85	24.2213
							50.85	22.2894
							ErrBox	ErrBox
							51.85	22.3732
							52.15	22.3732
							52.15	24.305
							51.85	24.305
							51.85	22.3732
							ErrBox	ErrBox
							52.85	22.2572
							53.15	22.2572
							53.15	24.4466
							52.85	24.4466
							52.85	22.2572
							ErrBox	ErrBox
							53.85	22.4247
							54.15	22.4247
							54.15	24.3565
							53.85	24.3565
							53.85	22.4247
							ErrBox	ErrBox
							54.85	22.5019
							55.15	22.5019
							55.15	24.4337
							54.85	24.4337
							54.85	22.5019
							ErrBox	ErrBox
							55.85	22.386
							56.15	22.386
							56.15	24.5754
							55.85	24.5754
							55.85	22.386
							ErrBox	ErrBox
							56.85	22.5149
							57.15	22.5149
							57.15	24.7042
							56.85	24.7042
							56.85	22.5149
							ErrBox	ErrBox
							57.85	22.5148
							58.15	22.5148
							58.15	24.8329
							57.85	24.8329
							57.85	22.5148
							ErrBox	ErrBox
							58.85	22.3861
							59.15	22.3861
							59.15	24.9617
							58.85	24.9617
							58.85	22.3861
							ErrBox	ErrBox
							59.85	22.9656
							60.15	22.9656
							60.15	25.1548
							59.85	25.1548
							59.85	22.9656
							ErrBox	ErrBox
							60.85	23.41
							61.15	23.41
							61.15	25.2127
							60.85	25.2127
							60.85	23.41
							ErrBox	ErrBox
							61.85	23.4872
							62.15	23.4872
							62.15	25.2899
							61.85	25.2899
							61.85	23.4872
							ErrBox	ErrBox
							62.85	23.4808
							63.15	23.4808
							63.15	25.7985
							62.85	25.7985
							62.85	23.4808
							ErrBox	ErrBox
							63.85	23.6096
							64.15	23.6096
							64.15	26.1848
							63.85	26.1848
							63.85	23.6096
							ErrBox	ErrBox
							64.85	24.4337
							65.15	24.4337
							65.15	26.3649
							64.85	26.3649
							64.85	24.4337
							ErrBox	ErrBox
							65.85	25.541
							66.15	25.541
							66.15	27.858
							65.85	27.858
							65.85	25.541
							ErrBox	ErrBox
							66.85	26.9635
							67.15	26.9635
							67.15	29.28
							66.85	29.28
							66.85	26.9635
							ErrBox	ErrBox
							67.85	27.3432
							68.15	27.3432
							68.15	29.9169
							67.85	29.9169
							67.85	27.3432
							ErrBox	ErrBox
							68.85	27.4719
							69.15	27.4719
							69.15	30.1742
							68.85	30.1742
							68.85	27.4719
							ErrBox	ErrBox
							69.85	28.4373
							70.15	28.4373
							70.15	32.6827
							69.85	32.6827
							69.85	28.4373
							ErrBox	ErrBox
							70.85	30.1743
							71.15	30.1743
							71.15	33.647
							70.85	33.647
							70.85	30.1743
							ErrBox	ErrBox
							71.85	31.9301
							72.15	31.9301
							72.15	34.3733
							71.85	34.3733
							71.85	31.9301
							ErrBox	ErrBox
							72.85	31.7179
							73.15	31.7179
							73.15	34.6755
							72.85	34.6755
							72.85	31.7179
							ErrBox	ErrBox
							73.85	31.9751
							74.15	31.9751
							74.15	34.9327
							73.85	34.9327
							73.85	31.9751
							ErrBox	ErrBox
							74.85	32.3867
							75.15	32.3867
							75.15	34.9583
							74.85	34.9583
							74.85	32.3867
							ErrBox	ErrBox
							75.85	32.4381
							76.15	32.4381
							76.15	35.0097
							75.85	35.0097
							75.85	32.4381
							ErrBox	ErrBox
							76.85	33.1325
							77.15	33.1325
							77.15	35.7039
							76.85	35.7039
							76.85	33.1325
							ErrBox	ErrBox
							77.85	32.8111
							78.15	32.8111
							78.15	36.1539
							77.85	36.1539
							77.85	32.8111
							ErrBox	ErrBox
							78.85	33.1968
							79.15	33.1968
							79.15	35.8968
							78.85	35.8968
							78.85	33.1968
							ErrBox	ErrBox
							79.85	33.1326
							80.15	33.1326
							80.15	35.961
							79.85	35.961
							79.85	33.1326
							ErrBox	ErrBox
							80.85	33.2611
							81.15	33.2611
							81.15	35.961
							80.85	35.961
							80.85	33.2611
							ErrBox	ErrBox
							81.85	33.3254
							82.15	33.3254
							82.15	36.1539
							81.85	36.1539
							81.85	33.3254
							ErrBox	ErrBox
							82.85	33.3898
							83.15	33.3898
							83.15	36.3467
							82.85	36.3467
							82.85	33.3898
							ErrBox	ErrBox
							83.85	33.6469
							84.15	33.6469
							84.15	36.7323
							83.85	36.7323
							83.85	33.6469
							ErrBox	ErrBox
							84.85	33.9041
							85.15	33.9041
							85.15	36.7322
							84.85	36.7322
							84.85	33.9041
							ErrBox	ErrBox
							85.85	33.9041
							86.15	33.9041
							86.15	36.7322
							85.85	36.7322
							85.85	33.9041
							ErrBox	ErrBox
							86.85	33.9041
							87.15	33.9041
							87.15	36.7322
							86.85	36.7322
							86.85	33.9041
							ErrBox	ErrBox
							87.85	33.9684
							88.15	33.9684
							88.15	36.7965
							87.85	36.7965
							87.85	33.9684
							ErrBox	ErrBox
							88.85	33.7113
							89.15	33.7113
							89.15	37.0536
							88.85	37.0536
							88.85	33.7113
							ErrBox	ErrBox
							89.85	33.5827
							90.15	33.5827
							90.15	37.4392
							89.85	37.4392
							89.85	33.5827
							ErrBox	ErrBox
							90.85	34.097
							91.15	34.097
							91.15	37.1821
							90.85	37.1821
							90.85	34.097
							ErrBox	ErrBox
							91.85	34.1612
							92.15	34.1612
							92.15	37.1178
							91.85	37.1178
							91.85	34.1612
							ErrBox	ErrBox
							92.85	34.1613
							93.15	34.1613
							93.15	37.2463
							92.85	37.2463
							92.85	34.1613
							ErrBox	ErrBox
							93.85	34.2255
							94.15	34.2255
							94.15	37.3106
							93.85	37.3106
							93.85	34.2255
							ErrBox	ErrBox
							94.85	33.7756
							95.15	33.7756
							95.15	37.7605
							94.85	37.7605
							94.85	33.7756
							ErrBox	ErrBox
							95.85	34.2898
							96.15	34.2898
							96.15	37.3749
							95.85	37.3749
							95.85	34.2898
							ErrBox	ErrBox
							96.85	34.2256
							97.15	34.2256
							97.15	37.5676
							96.85	37.5676
							96.85	34.2256
							ErrBox	ErrBox
							97.85	34.4184
							98.15	34.4184
							98.15	37.3748
							97.85	37.3748
							97.85	34.4184
							ErrBox	ErrBox
							98.85	34.6112
							99.15	34.6112
							99.15	37.4391
							98.85	37.4391
							98.85	34.6112
							ErrBox	ErrBox
							99.85	34.6112
							100.15	34.6112
							100.15	37.5676
							99.85	37.5676
							99.85	34.6112
							ErrBox	ErrBox
							100.85	34.6755
							101.15	34.6755
							101.15	37.5033
							100.85	37.5033
							100.85	34.6755
							ErrBox	ErrBox
							101.85	34.0328
							102.15	34.0328
							102.15	38.1461
							101.85	38.1461
							101.85	34.0328
							ErrBox	ErrBox
							102.85	34.8426
							103.15	34.8426
							103.15	37.5419
							102.85	37.5419
							102.85	34.8426
							ErrBox	ErrBox
							103.85	34.8684
							104.15	34.8684
							104.15	37.8246
							103.85	37.8246
							103.85	34.8684
							ErrBox	ErrBox
							104.85	34.8041
							105.15	34.8041
							105.15	38.0174
							104.85	38.0174
							104.85	34.8041
							ErrBox	ErrBox
							105.85	34.8041
							106.15	34.8041
							106.15	38.0174
							105.85	38.0174
							105.85	34.8041
							ErrBox	ErrBox
							106.85	34.8041
							107.15	34.8041
							107.15	38.1459
							106.85	38.1459
							106.85	34.8041
							ErrBox	ErrBox
							107.85	34.8684
							108.15	34.8684
							108.15	38.3387
							107.85	38.3387
							107.85	34.8684
							ErrBox	ErrBox
							108.85	34.6113
							109.15	34.6113
							109.15	38.5958
							108.85	38.5958
							108.85	34.6113
							ErrBox	ErrBox
							109.85	35.0612
							110.15	35.0612
							110.15	38.2744
							109.85	38.2744
							109.85	35.0612
							ErrBox	ErrBox
							110.85	34.7399
							111.15	34.7399
							111.15	38.5957
							110.85	38.5957
							110.85	34.7399
							ErrBox	ErrBox
							111.85	35.5818
							112.15	35.5818
							112.15	38.2807
							111.85	38.2807
							111.85	35.5818
							ErrBox	ErrBox
							112.85	35.704
							113.15	35.704
							113.15	38.9168
							112.85	38.9168
							112.85	35.704
							ErrBox	ErrBox
							113.85	35.7682
							114.15	35.7682
							114.15	38.8526
							113.85	38.8526
							113.85	35.7682
							ErrBox	ErrBox
							114.85	35.704
							115.15	35.704
							115.15	39.5593
							114.85	39.5593
							114.85	35.704
							ErrBox	ErrBox
							115.85	35.9611
							116.15	35.9611
							116.15	39.4308
							115.85	39.4308
							115.85	35.9611
							ErrBox	ErrBox
							116.85	36.2182
							117.15	36.2182
							117.15	39.9447
							116.85	39.9447
							116.85	36.2182
							ErrBox	ErrBox
							117.85	37.0535
							118.15	37.0535
							118.15	40.7797
							117.85	40.7797
							117.85	37.0535
							ErrBox	ErrBox
							118.85	50.7262
							119.15	50.7262
							119.15	56.1116
							118.85	56.1116
							118.85	50.7262
							ErrBox	ErrBox

[truncated: 30 more sheets: PlotDat21, PlotDat22, PlotDat25, PlotDat26, PlotDat27, PlotDat28, PlotDat30, PlotDat31, PlotDat32, PlotDat34, PlotDat35, PlotDat36, PlotDat37, PlotDat38, PlotDat3, PlotDat8, PlotDat10, PlotDat12, PlotDat11, PlotDat14 …]
